# Supplementary material for: De novo synthesis of inherently chiral heteracalix[4]aromatics from enantioselective macrocyclization enabled by chiral phosphoric acid-catalyzed intramolecular SNAr reaction
Source: Royal Society of Chemistry journal article supplement (doi:10.1039/d3sc06436k), 2024-01-01
Supplement: d3sc06436k1.pdf [file d3sc06436k1.pdf]

## Supporting Information

### De Novo Synthesis of Inherently Chiral Heteracalix[4]aromatics from Enantioselective Macrocyclization Enabled by Chiral Phosphoric Acid-catalyzed Intramolecular S<sub>N</sub>Ar Reaction

Xing-Chi Li,<sup>[a]</sup> Ying Cheng,<sup>\*[a]</sup> Xu-Dong Wang,<sup>[b]</sup> Shuo Tong,<sup>\*[c]</sup> and Mei-Xiang Wang<sup>\*[c]</sup>

<sup>[a]</sup> College of Chemistry, Beijing Normal University, Beijing 100875, China

<sup>[b]</sup> Laboratory of Molecular Recognition and Function, Institute of Chemistry, Chinese Academy of Sciences, Beijing 100190, China

<sup>[c]</sup> Key Laboratory of Bioorganic Phosphorous and Chemical Biology (MOE), Department of Chemistry, Tsinghua University, Beijing 100084, China

#### Table of Contents

|                                                                                                                                                                                                                                                                                              |           |
|----------------------------------------------------------------------------------------------------------------------------------------------------------------------------------------------------------------------------------------------------------------------------------------------|-----------|
| 1. General information.....                                                                                                                                                                                                                                                                  | pS2       |
| 2. Optimization of reaction conditions for the formation of macrocycles <b>6</b> .....                                                                                                                                                                                                       | pS2-5     |
| 3. Synthesis of 6-substituted 2,4-dichloro-1,3,5-triazines <b>2</b> .....                                                                                                                                                                                                                    | pS6-8     |
| 4. Synthesis of <i>N</i> -(3-((6-(alkoxy, alkyl, aryl)-4-chloro-1,3,5-triazin-2-yl)oxy)phenyl)-6-(alkoxy, alkyl, aryl)-4-chloro-1,3,5-triazin-2-amines <b>3</b> .....                                                                                                                        | pS9-12    |
| 5. Synthesis of <i>N</i> <sup>1</sup> , <i>N</i> <sup>3</sup> -dimethyl-2-benzyloxy-5-( <i>t</i> -butyl)benzene-1,3-diamines <b>4</b> .....                                                                                                                                                  | pS13-18   |
| 6. Synthesis of <i>N</i> <sup>1</sup> -(4-(3-((6-(alkoxy, alkyl, aryl)-4-chloro-1,3,5-triazin-2-yl)amino)phenoxy)-6-(alkoxy, alkyl, aryl)-1,3,5-triazin-2-yl)- <i>N</i> <sup>3</sup> , <i>N</i> <sup>3</sup> -dimethyl-2-(benzyloxy)-5-( <i>t</i> -butyl)benzene-1,3-diamines <b>5</b> ..... | pS18-24   |
| 7. Synthesis of racemic macrocycles <b>6</b> .....                                                                                                                                                                                                                                           | pS24-25   |
| 8. Enantioselective synthesis of inherently chiral macrocycles <b>6</b> .....                                                                                                                                                                                                                | pS25-32   |
| 9. Functionalization of macrocyclic compounds <i>S</i> <sub>ic</sub> -(+)- <b>6a</b> and <i>S</i> <sub>ic</sub> -(+)- <b>6g</b> .....                                                                                                                                                        | pS32-38   |
| 10. Crystal data and structure refinements for products (±)- <b>6a</b> , (±)- <b>6d</b> , (±)- <b>6j</b> , <i>S</i> <sub>ic</sub> -(+)- <b>6b</b> , (±)- <b>8d</b> and <i>S</i> <sub>ic</sub> -(+)- <b>8a</b> .....                                                                          | pS39-48   |
| 11. HPLC spectra of products <b>6</b> , <b>8</b> and <b>10</b> .....                                                                                                                                                                                                                         | pS49-71   |
| 12. Copies of CD spectra of compounds <b>6</b> , <b>8</b> and <b>10</b> .....                                                                                                                                                                                                                | pS72-82   |
| 13. Result of a control experiment.....                                                                                                                                                                                                                                                      | pS83-86   |
| 14. <sup>1</sup> H and <sup>13</sup> C NMR spectra of all products.....                                                                                                                                                                                                                      | pS86-148  |
| 15. Details of theoretical calculations.....                                                                                                                                                                                                                                                 | pS148-156 |

## 1. General Information

Commercially available chemical reagents were used without further purification. Anhydrous solvents were prepared according to standard procedures. Melting points were uncorrected.  $^1\text{H}$  NMR (400 and 600 MHz) and  $^{13}\text{C}\{^1\text{H}\}$  NMR (100 and 150 MHz) were recorded in the indicated solvents using JEOL NMR spectrometers. Coupling constants ( $J$  values) are reported in Hz. IR spectra were recorded using an AVATAR 360 FT-IR spectrometer. High resolution mass spectral analysis (HRMS) was performed on a LCT Premier XE (ESI). Column chromatography was performed using 200-300 mesh silica gel eluted with the solvents as indicated in experiments. The starting materials 2,4,6-trichloro-1,3,5-triazine, 3-aminophenol and substituted 3-aminophenols **1**, 4-(*t*-butyl)-2,6-dinitrophenol are commercially available.

## 2. Optimization of reaction conditions for the formation of macrocycles **6**

**Table S1. Formation of racemic **6a** from macrocyclization of **5a** under basic and acidic conditions.**

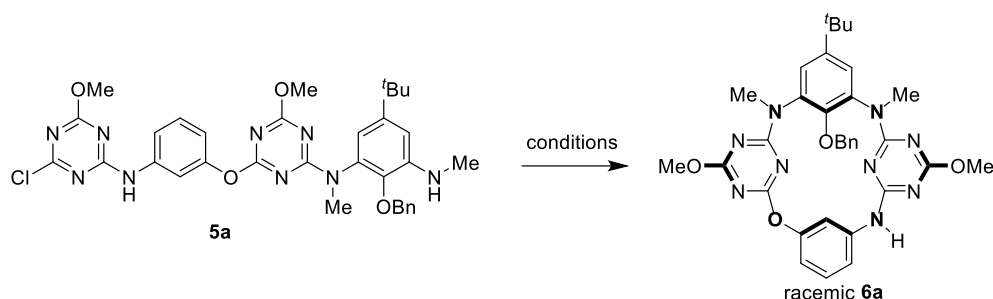

| Entry | Base or Acid<br>(equiv.)               | Solvent<br>( $c = 2.5 \times 10^{-3}$ M) | Temp.<br>( $^{\circ}\text{C}$ ) | Time<br>(h) | Yield<br>(%) |
|-------|----------------------------------------|------------------------------------------|---------------------------------|-------------|--------------|
| 1     | DIPEA (2.0)                            | acetone                                  | rt                              | 12          | 9            |
| 2     | $\text{Et}_3\text{N}$ (2.0)            | acetone                                  | rt                              | 12          | 7            |
| 3     | $\text{K}_2\text{CO}_3$ (2.0)          | acetone                                  | rt                              | 12          | 11           |
| 4     | $\text{Cs}_2\text{CO}_3$ (2.0)         | acetone                                  | rt                              | 12          | trace        |
| 5     | DIPEA (2.0)                            | DCM                                      | rt                              | 12          | 12           |
| 6     | $\text{K}_2\text{CO}_3$ (2.0)          | DCM                                      | rt                              | 12          | 8            |
| 7     | $\text{Cs}_2\text{CO}_3$ (2.0)         | $\text{CH}_3\text{CN}$                   | rt                              | 12          | 8            |
| 8     | $\text{Cs}_2\text{CO}_3$ (2.0)         | $\text{CH}_3\text{CN}$                   | reflux                          | 12          | 15           |
| 9     | $\text{CH}_3\text{CO}_2\text{H}$ (0.5) | DCM                                      | rt                              | 12          | 68           |
| 10    | $\text{CF}_3\text{CO}_2\text{H}$ (0.5) | DCM                                      | rt                              | 12          | 73           |
| 11    | <i>p</i> -TsOH (0.5)                   | DCM                                      | rt                              | 12          | 71           |
| 12    | HCl (1.0)                              | DCM                                      | rt                              | 12          | 66           |
| 13    | $\text{CF}_3\text{CO}_2\text{H}$ (1.0) | DCM                                      | rt                              | 12          | 73           |
| 14    | $\text{CF}_3\text{CO}_2\text{H}$ (2.0) | DCM                                      | rt                              | 12          | 76           |

**Table S2. Screening of chiral phosphoric acid catalysts.**

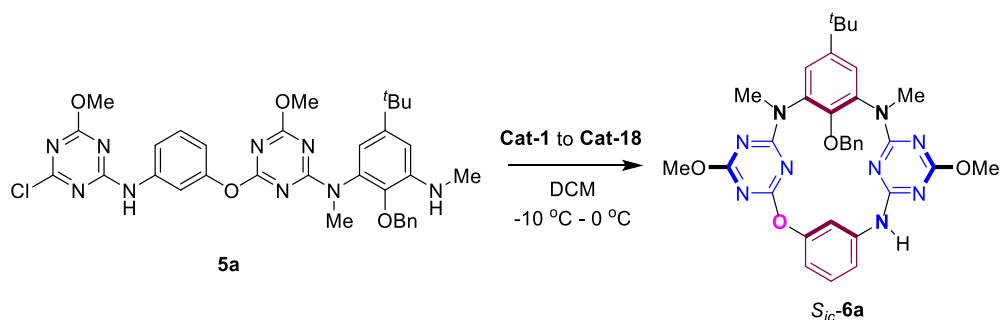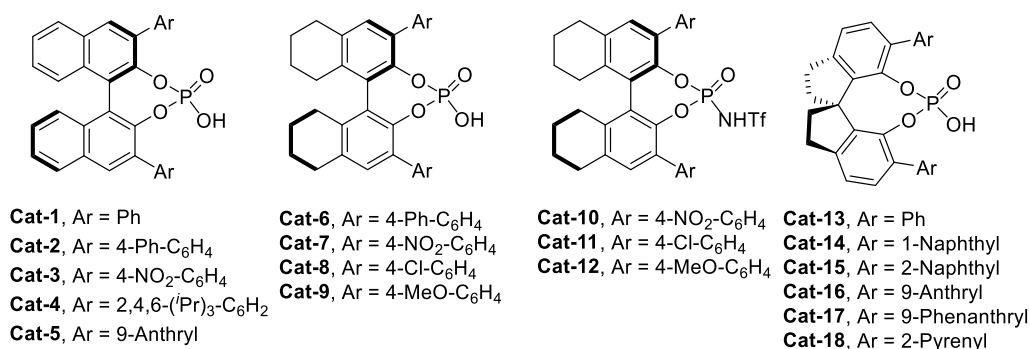

| Entry | Catalyst<br>(30 mol%) | Solvent<br>( <i>c</i> = 2.5×10 <sup>-3</sup> M) | Temp.<br>(°C) | Time<br>(h) | Yield<br>(%) | <i>ee</i> . (%) |
|-------|-----------------------|-------------------------------------------------|---------------|-------------|--------------|-----------------|
| 1     | <b>Cat-1</b>          | DCM                                             | 0             | 12          | 21           | 10              |
| 2     | <b>Cat-2</b>          | DCM                                             | 0             | 12          | 59           | 24              |
| 3     | <b>Cat-3</b>          | DCM                                             | -10           | 12          | 32           | 17              |
| 4     | <b>Cat-4</b>          | DCM                                             | 0             | 12          | 10           | 20              |
| 5     | <b>Cat-5</b>          | DCM                                             | 0             | 12          | 48           | 2               |
| 6     | <b>Cat-6</b>          | DCM                                             | 0             | 12          | 25           | 31              |
| 7     | <b>Cat-7</b>          | DCM                                             | -10           | 12          | 29           | 16              |
| 8     | <b>Cat-8</b>          | DCM                                             | -10           | 12          | 18           | 25              |
| 9     | <b>Cat-9</b>          | DCM                                             | -10           | 12          | 16           | 16              |
| 10    | <b>Cat-10</b>         | DCM                                             | 0             | 12          | 59           | 2               |
| 11    | <b>Cat-11</b>         | DCM                                             | 0             | 12          | trace        | 7               |
| 12    | <b>Cat-12</b>         | DCM                                             | 0             | 12          | 16           | 14              |
| 13    | <b>Cat-13</b>         | DCM                                             | 0             | 12          | 24           | 38              |
| 14    | <b>Cat-14</b>         | DCM                                             | 0             | 12          | 30           | 11              |
| 15    | <b>Cat-15</b>         | DCM                                             | 0             | 12          | 22           | 4               |
| 16    | <b>Cat-16</b>         | DCM                                             | 0             | 12          | 48           | 34              |

|    |               |     |   |    |    |    |
|----|---------------|-----|---|----|----|----|
| 17 | <b>Cat-17</b> | DCM | 0 | 12 | 29 | 20 |
| 18 | <b>Cat-18</b> | DCM | 0 | 12 | 14 | 11 |

**Table S3. Optimization of Cat-16 catalyzed macrocyclization reaction of 5a.**

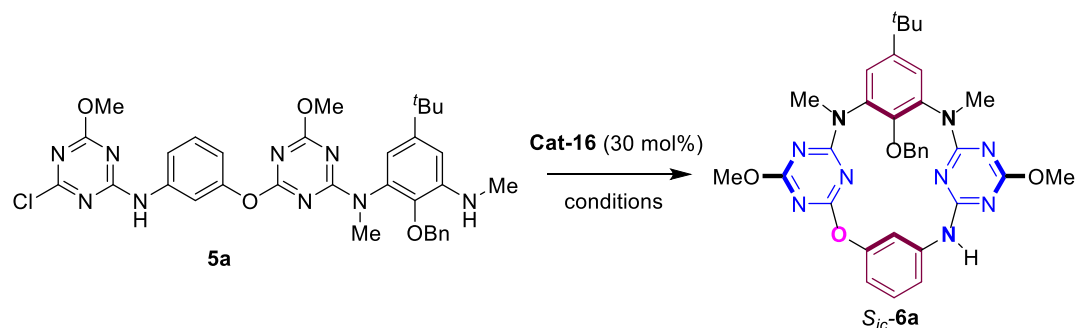

| Entry             | Solvent<br>( $c = 2.5 \times 10^{-3}$ M) | Additive                | Temp.<br>(°C) | Time (h) | Yield (%) | ee. (%) |
|-------------------|------------------------------------------|-------------------------|---------------|----------|-----------|---------|
| 1                 | DCM                                      | -                       | 0             | 12       | 48        | 34      |
| 2                 | DCE                                      | -                       | 0             | 12       | 50        | 47      |
| 3                 | CHCl <sub>3</sub>                        | -                       | 0             | 12       | 48        | 64      |
| 4                 | CHCl <sub>3</sub>                        | -                       | -30           | 24       | 17        | 85      |
| 5                 | CCl <sub>4</sub>                         | -                       | 0             | 12       | 16        | 86      |
| 6                 | toluene                                  | -                       | 0             | 12       | 10        | 64      |
| 7                 | xylene                                   | -                       | 0             | 12       | 11        | 68      |
| 8                 | acetone                                  | -                       | 0             | 12       | 7         | 33      |
| 9                 | CH <sub>3</sub> CN                       | -                       | 0             | 12       | trace     | 48      |
| 10                | benzene                                  | -                       | 0             | 12       | 21        | 64      |
| 11                | CCl <sub>4</sub>                         | -                       | 0             | 24       | 23        | 86      |
| 12                | CCl <sub>4</sub>                         | -                       | 0             | 36       | 31        | 86      |
| 13                | CCl <sub>4</sub>                         | -                       | 0             | 72       | 37        | 85      |
| 14                | CCl <sub>4</sub>                         | -                       | -10           | 24       | 14        | 87      |
| 15                | CCl <sub>4</sub>                         | -                       | 10            | 24       | 33        | 83      |
| 16                | CCl <sub>4</sub>                         | -                       | 20            | 24       | 40        | 78      |
| 17                | CCl <sub>4</sub>                         | -                       | 30            | 24       | 64        | 72      |
| 18 <sup>[a]</sup> | CCl <sub>4</sub>                         | -                       | 0             | 24       | 15        | 86      |
| 19 <sup>[b]</sup> | CCl <sub>4</sub>                         | -                       | 0             | 24       | 21        | 85      |
| 20 <sup>[c]</sup> | CCl <sub>4</sub>                         | -                       | 0             | 24       | 15        | 87      |
| 21                | CCl <sub>4</sub>                         | 3 Å M.S. <sup>[d]</sup> | 0             | 24       | 19        | 88      |
| 22                | CCl <sub>4</sub>                         | 4 Å M.S. <sup>[d]</sup> | 0             | 24       | 19        | 88      |

|    |                                                                       |                                                                   |     |    |      |    |
|----|-----------------------------------------------------------------------|-------------------------------------------------------------------|-----|----|------|----|
| 23 | CCl <sub>4</sub>                                                      | 5 Å M.S. <sup>[d]</sup>                                           | 0   | 24 | 26   | 87 |
| 24 | CCl <sub>4</sub>                                                      | 3 Å M.S. <sup>[e]</sup>                                           | 0   | 24 | 27   | 87 |
| 25 | CCl <sub>4</sub>                                                      | 4 Å M.S. <sup>[e]</sup>                                           | 0   | 24 | 28   | 88 |
| 26 | CCl <sub>4</sub>                                                      | 5 Å M.S. <sup>[e]</sup>                                           | 0   | 24 | 26   | 86 |
| 27 | CCl <sub>4</sub>                                                      | Ag <sub>2</sub> CO <sub>3</sub><br>(1.0 equiv.) <sup>[f]</sup>    | 0   | 12 | 20   | 88 |
| 28 | CCl <sub>4</sub>                                                      | CH <sub>3</sub> CO <sub>2</sub> Ag<br>(1.0 equiv.) <sup>[f]</sup> | 0   | 24 | N.R. |    |
| 29 | CCl <sub>4</sub>                                                      | K <sub>2</sub> CO <sub>3</sub><br>(0.6 equiv.) <sup>[g]</sup>     | 0   | 72 | 38   | 87 |
| 30 | CCl <sub>4</sub>                                                      | K <sub>2</sub> CO <sub>3</sub><br>(1.0 equiv.) <sup>[g]</sup>     | 0   | 72 | 31   | 90 |
| 31 | CCl <sub>4</sub> : Cl <sub>2</sub> CHCHCl <sub>2</sub><br>(13 : 7 mL) | -                                                                 | 0   | 24 | 52   | 15 |
| 32 | CCl <sub>4</sub> : CHCl <sub>3</sub><br>(13 : 7 mL)                   | -                                                                 | 0   | 24 | 54   | 76 |
| 33 | CCl <sub>4</sub> : CHCl <sub>3</sub><br>(13 : 7 mL)                   | -                                                                 | -30 | 24 | 21   | 90 |
| 34 | CCl <sub>4</sub> : cyclohexane<br>(13 : 7 mL)                         | -                                                                 | 0   | 24 | 12   | 90 |
| 35 | CCl <sub>4</sub> : cyclohexane<br>(13 : 7 mL)                         | -                                                                 | 0   | 48 | 19   | 90 |
| 36 | CCl <sub>4</sub> : cyclohexane<br>(13 : 7 mL)                         | -                                                                 | 0   | 72 | 24   | 90 |
| 37 | CCl <sub>4</sub> : cyclohexane<br>(13 : 7 mL)                         | -                                                                 | 10  | 24 | 33   | 88 |
| 38 | CCl <sub>4</sub> : CHCl <sub>3</sub><br>(13 : 7 mL)                   | K <sub>2</sub> CO <sub>3</sub><br>(0.6 equiv.) <sup>[g]</sup>     | -30 | 72 | 30   | 92 |
| 39 | CCl <sub>4</sub> : cyclohexane<br>(13 : 7 mL)                         | K <sub>2</sub> CO <sub>3</sub><br>(0.6 equiv.) <sup>[f]</sup>     | 0   | 72 | 6    | 90 |
| 40 | CCl <sub>4</sub> : cyclohexane<br>(13 : 7 mL)                         | K <sub>2</sub> CO <sub>3</sub><br>(0.6 equiv.) <sup>[g]</sup>     | 0   | 72 | 36   | 93 |
| 41 | CCl <sub>4</sub> : cyclohexane<br>(13 : 7 mL)                         | K <sub>2</sub> CO <sub>3</sub><br>(1.0 equiv.) <sup>[g]</sup>     | 0   | 72 | 28   | 92 |
| 42 | 1,2-dichloroethane                                                    | K <sub>2</sub> CO <sub>3</sub><br>(0.6 equiv.)                    | 0   | 72 | 84   | 41 |

<sup>[a]</sup> Catalyst loading is 20 mol%.

<sup>[b]</sup> Concentration of **5a** is 5.0×10<sup>-3</sup> M.

<sup>[c]</sup> Concentration of **5a** is 2.5×10<sup>-2</sup> M.

<sup>[d]</sup> Non-activated molecular sieve (30 mg), **5a** and **Cat-16** were mixed in a reaction vial.

<sup>[e]</sup> Activated molecular sieve (30 mg), **5a** and **Cat-16** were mixed in a reaction vial.

[f] K<sub>2</sub>CO<sub>3</sub> or silver salt, **5a** and **Cat-16** were mixed in a reaction vial.

[g] K<sub>2</sub>CO<sub>3</sub> was added after 12 h.

### 3. Synthesis of 6-substituted 2,4-dichloro-1,3,5-triazines (monomers)

#### 3.1 Preparation of 6-alkoxy-2,4-dichloro-1,3,5-triazines **2a-2d**

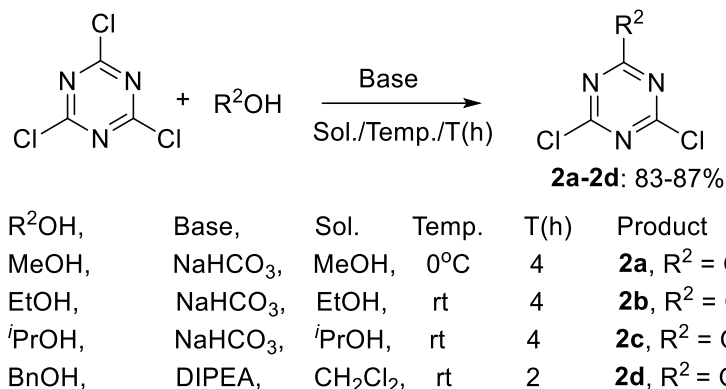

Scheme S1

- A. In a flask that was cooled in an ice bath, 2,4,6-trichloro-1,3,5-triazine (9.22 g, 50 mmol) and NaHCO<sub>3</sub> (4.62 g, 55 mmol) were mixed with an alcohol (methanol, ethanol or isopropanol) (50 mL). The resulting mixture was stirred for 4h at 0 °C or for 4h at room temperature (see Scheme S1). The reaction was quenched by the addition of ice water (100 mL) and the resulting mixture was stirred for 5 min. 2,4-Dichloro-6-methoxy-1,3,5-triazine **2a** was then precipitated from the mixture. After being filtrated, washed with ice water (2×50 mL) and dried under vacuum, the product **2a** was obtained in 83% yield. 2,4-Dichloro-6-ethoxy-1,3,5-triazine **2b** and 2,4-dichloro-6-isopropoxy-1,3,5-triazine **2c** were isolated from the mixture by extraction with ethyl acetate (200×2 mL). The organic layer was washed with saturated aqueous sodium chloride (50×3 mL) and was dried over anhydrous Na<sub>2</sub>SO<sub>4</sub>. After removal of Na<sub>2</sub>SO<sub>4</sub> and solvents, the residue was chromatographed on a silica gel column eluting with a mixture of petroleum ether and ethyl acetate (PE:EA = 10:1) to give products **2b** in 87% and **2c** in 83% yields.
- B. At 0 °C, a solution of phenylmethanol (4.33g, 40 mmol) and DIPEA (5.69 g, 44 mmol) in CH<sub>2</sub>Cl<sub>2</sub> (40 mL) was added dropwise in 30 min to the solution of 2,4,6-trichloro-1,3,5-triazine (7.38 g, 40 mmol) in dichloromethane (70 mL) cooled in an ice bath. The resulting mixture was stirred for 2 h at room temperature. The reaction mixture was then washed with aqueous HCl (1M, 110 mL) and saturated aqueous NaCl (50×2 mL). The organic layer was dried over anhydrous Na<sub>2</sub>SO<sub>4</sub> and concentrated under vacuum. The residue was chromatographed on a silica gel column eluting with a mixture of petroleum ether and chloroform (PE:CHCl<sub>3</sub> = 1:1) to give product **2d** in 87% yield.

### 3.2 Preparation of 2,4-dichloro-6-(4-methoxyphenyl)-1,3,5-triazine **2e** and 2,4-dichloro-6-methyl-1,3,5-triazine **2f**

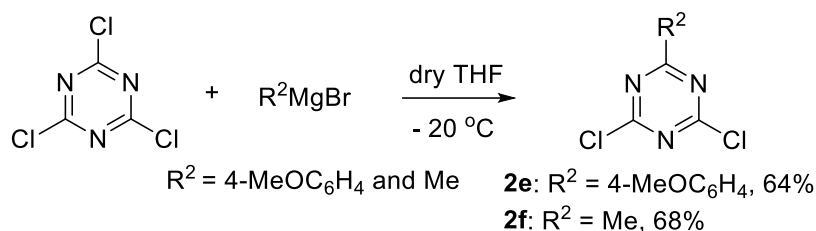

Scheme S2

Under the protection of nitrogen atmosphere, the Grignard reagent (*p*-methoxyphenyl)magnesium bromide or methylmagnesium bromide (50 mmol, 50 mL, 1.0 mol/L in THF) was added dropwise in 1 h to the solution of 2,4,6-trichloro-1,3,5-triazine (9.22 g, 50 mmol) in dry THF (30 mL) which was cooled at - 20 °C. The resulting mixture was stirred for another 1 h at - 20 °C. The reaction solution was concentrated, and then aqueous HCl (1M, 100 mL) was added. The resulting mixture was extracted with dichloromethane (50×2 mL). The combined organic layer was washed with saturated aqueous NaCl (30×3 mL) and dried over anhydrous Na<sub>2</sub>SO<sub>4</sub>. After removal of solvent under vacuum. The residue was chromatographed on a silica gel column eluting with a mixture of petroleum ether and ethyl acetate (PE:EA = 15:1) to give products **2e** (64%) and **2f** (68%), respectively.

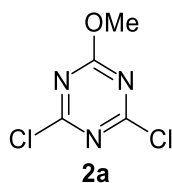

**2,4-Dichloro-6-methoxy-1,3,5-triazine 2a:**<sup>[1]</sup> white solid, 7.43 g (from 50 mmol 2,4,6-trichloro-1,3,5-triazine), 83% yield, mp 90 - 91 °C. <sup>1</sup>H NMR (600 MHz, Acetone-*d*<sub>6</sub>) δ (ppm): 4.13 (s, 3H). <sup>13</sup>C NMR (150 MHz, Acetone-*d*<sub>6</sub>) δ (ppm): 172.7, 172.6, 57.3. IR (KBr) ν 1510, 1488 cm<sup>-1</sup>.

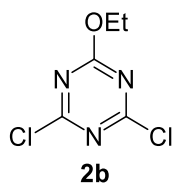

**2,4-Dichloro-6-ethoxy-1,3,5-triazine 2b:**<sup>[2]</sup> white solid, 8.36 (from 50 mmol 2,4,6-trichloro-1,3,5-triazine), 87% yield, mp 31 - 32 °C. <sup>1</sup>H NMR (600 MHz, CDCl<sub>3</sub>) δ (ppm): 4.54 (q, *J* = 7.2 Hz, 2H), 1.43 (t, *J* = 7.2 Hz, 3H). <sup>13</sup>C NMR (150 MHz, CDCl<sub>3</sub>) δ (ppm): 172.6, 171.0, 66.7, 14.0. IR (KBr) ν 1545, 1508 cm<sup>-1</sup>.

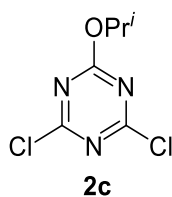

**2,4-Dichloro-6-isopropoxy-1,3,5-triazine 2c:**<sup>[2]</sup> colorless oil, 8.60 g (from 50 mmol 2,4,6-trichloro-1,3,5-triazine), 83% yield. <sup>1</sup>H NMR (400 MHz, Acetone-*d*<sub>6</sub>)  $\delta$  (ppm): 5.40 (hept, *J* = 6.0 Hz, 1H), 1.41 (d, *J* = 6.0 Hz, 6H). <sup>13</sup>C NMR (100 MHz, Acetone-*d*<sub>6</sub>)  $\delta$  (ppm): 172.4, 171.2, 75.1, 21.4. IR (KBr)  $\nu$  1543, 1504, 1458 cm<sup>-1</sup>.

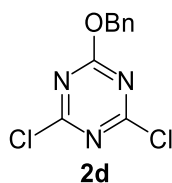

**2-(Benzyloxy)-4,6-dichloro-1,3,5-triazine 2d:**<sup>[3]</sup> white solid, 8.87 g (from 40 mmol 2,4,6-trichloro-1,3,5-triazine), 87% yield, mp 87 - 88 °C. <sup>1</sup>H NMR (400 MHz, Acetone-*d*<sub>6</sub>)  $\delta$  (ppm): 7.53 (dd, *J* = 8.0, 2.0 Hz, 2H), 7.45 - 7.39 (m, 3H), 5.57 (s, 2H). <sup>13</sup>C NMR (100 MHz, CDCl<sub>3</sub>)  $\delta$  (ppm): 172.7, 171.0, 133.9, 129.2, 128.9, 128.8, 71.9. IR (KBr)  $\nu$  1537, 1510, 1499 cm<sup>-1</sup>.

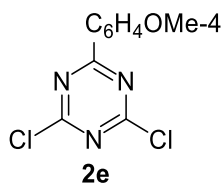

**2,4-Dichloro-6-(4-methoxyphenyl)-1,3,5-triazine 2e:** white solid, 8.20 g (from 50 mmol 2,4,6-trichloro-1,3,5-triazine), 64% yield, mp 129 - 130 °C. <sup>1</sup>H NMR (600 MHz, CDCl<sub>3</sub>)  $\delta$  (ppm): 8.46 (d, *J* = 6.6 Hz, 2H), 6.99 (d, *J* = 6.6 Hz, 2H), 3.91 (s, 3H). <sup>13</sup>C NMR (150 MHz, CDCl<sub>3</sub>)  $\delta$  (ppm): 174.3, 171.8, 165.3, 132.4, 125.2, 114.6, 55.8. IR (KBr)  $\nu$  1607, 1543, 1479 cm<sup>-1</sup>. HRMS (TOF-ESI) *m/z* [M+H]<sup>+</sup> calcd. for C<sub>10</sub>H<sub>8</sub>Cl<sub>2</sub>N<sub>3</sub>O: 256.0038; Found: 256.0036.

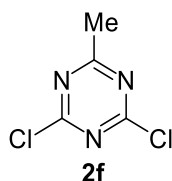

**2,4-Dichloro-6-methyl-1,3,5-triazine 2f:** white solid, 5.55 g (from 50 mmol 2,4,6-trichloro-1,3,5-triazine), 68% yield, mp 94 - 95 °C. <sup>1</sup>H NMR (600 MHz, CDCl<sub>3</sub>)  $\delta$  (ppm): 2.67 (s, 3H). <sup>13</sup>C NMR (150 MHz, CDCl<sub>3</sub>)  $\delta$  (ppm): 180.9, 171.8, 25.5. IR (KBr)  $\nu$ : 1524, 1496 cm<sup>-1</sup>. HRMS (TOF-ESI) *m/z* [M+H]<sup>+</sup> calcd. for C<sub>4</sub>H<sub>4</sub>Cl<sub>2</sub>N<sub>3</sub>: 161.9631; Found: 161.9635.

(Ref.:

[1]. H. Tanaka, A. Wada, M. Shiro, K. Hioki, D. Morisaki, M. Kunishima, Synthesis of aza-bridged calix(4-methoxy) triazines toward flattened  $\pi$  - conjugated macrocycles. *Heterocycles*, **2009**, *79*,

[2]. S. Yrjölä, T. Kalliokoski, T. Laitinen, A. Poso, T. Parkkari, T. Nevalainen, Discovery of novel cannabinoid receptor ligands by a virtual screening approach: Further development of 2,4,6-trisubstituted 1,3,5-triazines as CB<sub>2</sub> agonists. *Eur. J. Pharm. Sci.* **2013**, 48, 9 - 20.

[3]. H. Fujita, N. Hayakawa, M. Kunishima, Study of the reactivities of acid-catalyzed *O*-benzylating reagents based on structural isomers of 1,3,5-triazine. *J. Org. Chem.* **2015**, 80, 11200-11205.)

#### 4. Synthesis of *N*-(3-((6-(alkoxy, alkyl, aryl)-4-chloro-1,3,5-triazin-2-yl)oxy)phenyl)-6-(alkoxy, alkyl, aryl)-4-chloro-1,3,5-triazin-2-amines (trimers)

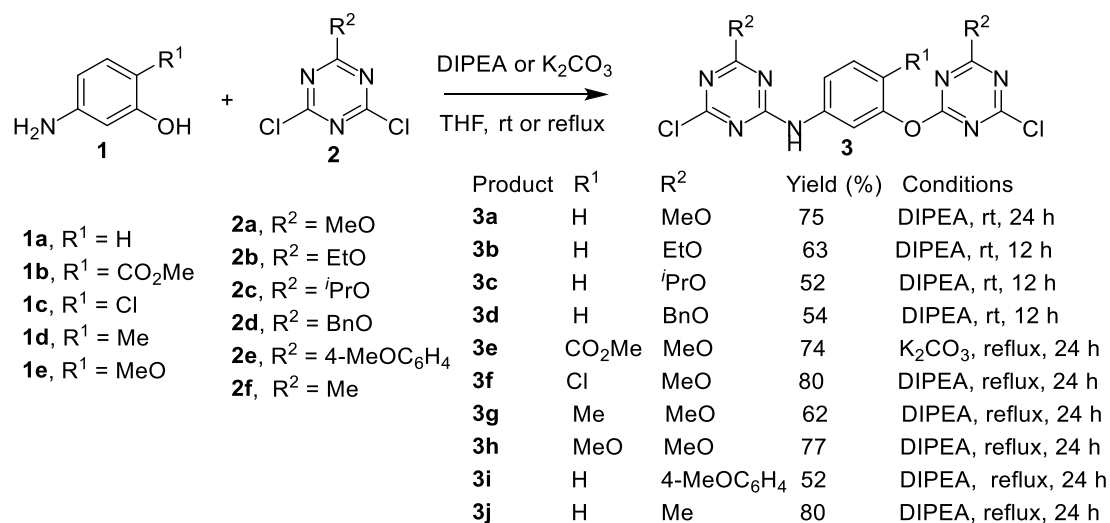

Scheme S3

##### A. Preparation of compounds 3a-3d and 3f-3j

At ambient temperature, 2,4-dichloro-6-substituent-1,3,5-triazines **2** (4.8 mmol) were dissolved in THF (20 mL) in a flask. The solution of 3-aminophenols **1** (2 mmol) and DIPEA (5.0 mmol, 646.2 mg) in THF (20 mL) was added dropwise in 30 min into the flask. The resulting mixture was stirred for 12-24h at room temperature or for 24h in refluxing THF (see Scheme S3). After filtrating diisopropylethylammonium chloride salt, the reaction solution was concentrated under reduced pressure. The products **3a-3d** and **3f-3j** were isolated by chromatography on a silica gel column eluting with a mixture of petroleum ether and ethyl acetate (PE:EA from 4:1 to 2:1 for **3a-3d**, **3f**, and **3h-3j**; PE:EA = 4:1 for **3g**).

##### B. Preparation of compound 3e

At ambient temperature, methyl 4-aminosalicylate **1b** (2 mmol), 2,4-dichloro-6-methoxy-1,3,5-triazine **2a** (864.0 mg, 4.8 mmol), K<sub>2</sub>CO<sub>3</sub> (691.1 mg, 5.0 mmol) and THF (40 mL) were added into a flask. The resulting mixture was stirred for 24 h in refluxing solvent. The inorganic salts were filtrated and washed with dichloromethane (10 mL). The solvents of combined filtrate was evaporated under reduced pressure and the residue was dissolved in dichloromethane (200 mL). The

resulting solution was washed with saturated aqueous NaCl (30 × 3 mL) and was dried over anhydrous Na<sub>2</sub>SO<sub>4</sub>. After removal of Na<sub>2</sub>SO<sub>4</sub> and dichloromethane, the residue was recrystallized in a mixture of dichloromethane and petroleum ether to give product **3e** in 74% yield.

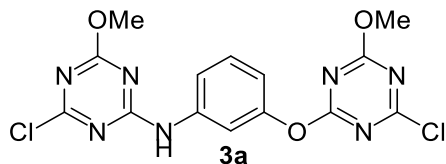

**N-(3-((4-Chloro-6-methoxy-1,3,5-triazin-2-yl)oxy)phenyl)-4-chloro-6-methoxy-1,3,5-triazin-2-amine 3a:** white solid, 604.6 mg, 75% yield, mp 148 - 149 °C. <sup>1</sup>H NMR (400 MHz, Acetone-*d*<sub>6</sub>)  $\delta$  (ppm): 9.62 (s, 1H), 7.86 (brs, 1H), 7.71 (d, *J* = 8.4 Hz, 1H), 7.50 (t, *J* = 8.4 Hz, 1H), 7.09 (dd, *J* = 8.0, 2.4 Hz, 1H), 4.01 (s, 3H), 3.99 (s, 3H). <sup>13</sup>C NMR (100 MHz, CDCl<sub>3</sub>)  $\delta$  (ppm): 173.5, 172.9, 172.2, 171.6, 171.1, 165.2, 151.8, 138.4, 130.2, 118.7, 117.6, 114.1, 56.5, 55.9. IR (KBr)  $\nu$ : 3353 (w), 3287 (w), 1613, 1559 cm<sup>-1</sup>. HRMS (TOF-ESI) *m/z* [M + H]<sup>+</sup> calcd for C<sub>14</sub>H<sub>12</sub>Cl<sub>2</sub>N<sub>7</sub>O<sub>3</sub>: 396.0373; Found: 396.0376.

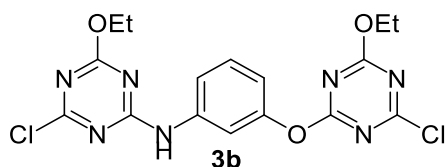

**N-(3-((4-Chloro-6-ethoxy-1,3,5-triazin-2-yl)oxy)phenyl)-4-chloro-6-ethoxy-1,3,5-triazin-2-amine 3b:** white solid, 533.1 mg, 63% yield, mp 122 - 123 °C. <sup>1</sup>H NMR (400 MHz, Acetone-*d*<sub>6</sub>)  $\delta$  (ppm): 9.56 (s, 1H), 7.83 (brs, 1H), 7.69 (d, *J* = 8.0 Hz, 1H), 7.48 (t, *J* = 8.0 Hz, 1H), 7.07 (dd, *J* = 8.0, 2.0 Hz, 1H), 4.46 - 4.38 (m, 4H), 1.344 (t, *J* = 6.8 Hz, 3H), 1.337 (t, *J* = 6.8 Hz, 3H). <sup>13</sup>C NMR (100 MHz, Acetone-*d*<sub>6</sub>)  $\delta$  (ppm): 173.2, 173.13, 173.06, 171.7, 171.2, 166.3, 152.7, 140.2, 130.5, 119.2, 117.7, 114.6, 66.1, 65.0, 14.3, 14.1. IR (KBr)  $\nu$ : 3356 (w), 3290 (w), 1613, 1557, 1538 cm<sup>-1</sup>. HRMS (TOF-ESI) *m/z* [M+H]<sup>+</sup> calcd for C<sub>16</sub>H<sub>16</sub>Cl<sub>2</sub>N<sub>7</sub>O<sub>3</sub>: 424.0686; Found: 424.0689.

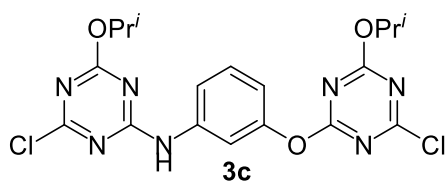

**N-(3-((4-Chloro-6-isopropoxy-1,3,5-triazin-2-yl)oxy)phenyl)-4-chloro-6-isopropoxy-1,3,5-triazin-2-amine 3c:** white solid, 469.1 mg, 52% yield, mp 78 - 79 °C. <sup>1</sup>H NMR (400 MHz, Acetone-*d*<sub>6</sub>)  $\delta$  (ppm): 9.51 (s, 1H), 7.82 (brs, 1H), 7.67 (d, *J* = 8.0 Hz, 1H), 7.46 (t, *J* = 8.0 Hz, 1H), 7.06 (dd, *J* = 8.0, 2.4 Hz, 1H), 5.29 - 5.19 (m, 2H), 1.33 (d, *J* = 5.6 Hz, 6H), 1.32 (d, *J* = 6.0 Hz, 6H). <sup>13</sup>C NMR (100 MHz, Acetone-*d*<sub>6</sub>)  $\delta$  (ppm): 173.2, 173.0, 172.5, 171.1, 166.1, 152.6, 140.1, 130.4, 119.0, 117.6, 114.4, 73.9, 72.5, 21.6, 21.4. IR (KBr)  $\nu$ : 3356 (w), 3291 (w), 1616, 1557, 1533 cm<sup>-1</sup>. HRMS (TOF-ESI) *m/z* [M+H]<sup>+</sup> calcd. for C<sub>18</sub>H<sub>20</sub>Cl<sub>2</sub>N<sub>7</sub>O<sub>3</sub>: 452.0999; Found: 452.1003.

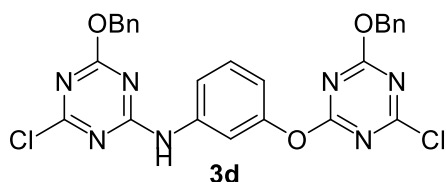

***N*-(3-((4-(Benzyloxy)-6-chloro-1,3,5-triazin-2-yl)oxy)phenyl)-4-(benzyloxy)-6-chloro-1,3,5-triazin-2-amine 3d**: white solid, 590.9 mg, 54% yield, mp 71 - 72 °C. <sup>1</sup>H NMR (400 MHz, Acetone-*d*<sub>6</sub>)  $\delta$  (ppm): 9.66 (brs, 1H), 7.83 (brs, 1H), 7.68 (d, *J* = 8.0 Hz, 1H), 7.51 (t, *J* = 8.0 Hz, 1H), 7.44 - 7.31 (m, 10H), 7.08 (d, *J* = 8.0 Hz, 1H), 5.45 (s, 2H), 5.40 (s, 2H). <sup>13</sup>C NMR (100 MHz, Acetone-*d*<sub>6</sub>)  $\delta$  (ppm): 173.3, 173.0, 171.6, 171.2, 166.2, 152.6, 140.1, 136.3, 135.6, 130.5, 129.3, 129.1, 128.9, 128.7, 119.4, 117.8, 114.8, 71.2, 70.3. IR (KBr)  $\nu$ : 3356, 3195, 1657, 1588, 1545 cm<sup>-1</sup>. HRMS (TOF-ESI) *m/z* [M+H]<sup>+</sup> calcd. for C<sub>26</sub>H<sub>20</sub>Cl<sub>2</sub>N<sub>7</sub>O<sub>3</sub>: 548.0999; Found: 548.0997.

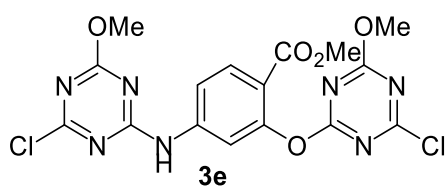

**Methyl 4-((4-chloro-6-methoxy-1,3,5-triazin-2-yl)amino)-2-((4-chloro-6-methoxy-1,3,5-triazin-2-yl)oxy)benzoate 3e**: white solid, 670.5 mg, 74% yield, mp 216 - 218 °C. <sup>1</sup>H NMR (400 MHz, Acetone-*d*<sub>6</sub>)  $\delta$  (ppm): 9.90 (brs, 1H), 8.10 (d, *J* = 8.4 Hz, 1H), 7.97 (s, 1H), 7.87 (d, *J* = 8.4 Hz, 1H), 4.03 (s, 3H), 4.00 (s, 3H), 3.72 (s, 3H). <sup>13</sup>C NMR (100 MHz, DMSO-*d*<sub>6</sub>)  $\delta$  (ppm): 172.4, 171.9, 171.8, 171.0, 170.0, 165.0, 163.7, 151.1, 143.9, 132.5, 118.0, 116.7, 114.3, 56.4, 55.7, 52.2. IR (KBr)  $\nu$ : 3280 (w), 3171 (w), 1697, 1619, 1562 cm<sup>-1</sup>. HRMS (TOF-ESI) *m/z* [M+H]<sup>+</sup> calcd. for C<sub>16</sub>H<sub>14</sub>Cl<sub>2</sub>N<sub>7</sub>O<sub>5</sub>: 454.0427; Found: 454.0429.

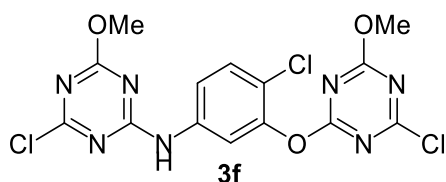

***N*-(4-Chloro-3-((4-chloro-6-methoxy-1,3,5-triazin-2-yl)oxy)phenyl)-4-chloro-6-methoxy-1,3,5-triazin-2-amine 3f**: white solid, 687.0 mg, 80% yield, mp 172 - 173 °C. <sup>1</sup>H NMR (400 MHz, Acetone-*d*<sub>6</sub>)  $\delta$  (ppm): 9.72 (s, 1H), 8.00 (s, 1H), 7.76 (d, *J* = 9.2 Hz, 1H), 7.59 (d, *J* = 8.8 Hz, 1H), 4.03 (s, 3H), 3.99 (s, 3H). <sup>13</sup>C NMR (150 MHz, DMSO-*d*<sub>6</sub>)  $\delta$  (ppm): 172.6, 172.1, 171.1, 169.8, 164.9, 146.9, 138.4, 130.5, 120.0, 115.6, 56.6, 55.6. IR (KBr)  $\nu$ : 3358, 3288, 1611, 1560 cm<sup>-1</sup>. HRMS (TOF-ESI) *m/z* [M+H]<sup>+</sup> calcd. for C<sub>14</sub>H<sub>11</sub>Cl<sub>3</sub>N<sub>7</sub>O<sub>3</sub>: 429.9983; Found: 429.9986.

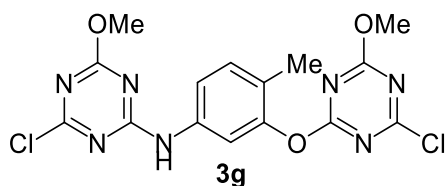

***N*-(3-((4-Chloro-6-methoxy-1,3,5-triazin-2-yl)oxy)-4-methylphenyl)-4-chloro-6-methoxy-**

**1,3,5-triazin-2-amine 3g:** white solid, 507.2 mg, 62% yield, mp 185 - 186 °C. <sup>1</sup>H NMR (400 MHz, Acetone-*d*<sub>6</sub>)  $\delta$  (ppm): 9.54 (brs, 1H), 7.76 (brs, 1H), 7.60 (d, *J* = 8.4 Hz, 1H), 7.35 (d, *J* = 8.4 Hz, 1H), 4.00 (s, 3H), 3.97 (s, 3H), 2.15 (s, 3H). <sup>13</sup>C NMR (100 MHz, Acetone-*d*<sub>6</sub>)  $\delta$  (ppm): 173.9, 173.4, 172.9, 172.4, 171.1, 166.3, 150.9, 137.9, 132.0, 126.5, 119.8, 115.2, 56.5, 55.8, 15.6. IR (KBr)  $\nu$ : 3356 (w), 3286 (w), 1610, 1559, 1540 cm<sup>-1</sup>. HRMS (TOF-ESI) *m/z* [M+H]<sup>+</sup> calcd. for C<sub>15</sub>H<sub>14</sub>Cl<sub>2</sub>N<sub>7</sub>O<sub>3</sub>: 410.0529; Found: 410.0535.

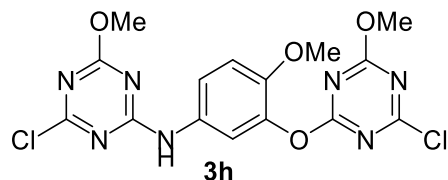

***N*-(3-((4-Chloro-6-methoxy-1,3,5-triazin-2-yl)oxy)-4-methoxyphenyl)-4-chloro-6-methoxy-1,3,5-triazin-2-amine 3h:** white solid, 655.0 mg, 77% yield, mp 164 - 166 °C. <sup>1</sup>H NMR (400 MHz, Acetone-*d*<sub>6</sub>)  $\delta$  (ppm): 9.43 (s, 1H), 7.78 (s, 1H), 7.66 (d, *J* = 9.6 Hz, 1H), 7.21 (d, *J* = 8.8 Hz, 1H), 4.00 (s, 3H), 3.97 (s, 3H), 3.81 (s, 3H). <sup>13</sup>C NMR (150 MHz, DMSO-*d*<sub>6</sub>, 60 °C)  $\delta$  (ppm): 172.4, 171.7, 171.4, 170.8, 169.4, 164.7, 147.1, 139.4, 131.0, 120.0, 115.5, 113.4, 56.14, 56.05, 55.1. IR (KBr)  $\nu$ : 3361, 3288, 1613, 1563, 1509 cm<sup>-1</sup>. HRMS (TOF-ESI) *m/z* [M+H]<sup>+</sup> calcd. for C<sub>15</sub>H<sub>14</sub>Cl<sub>2</sub>N<sub>7</sub>O<sub>4</sub>: 426.0478; Found: 426.0474.

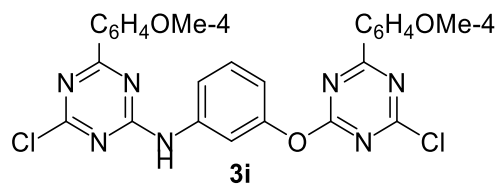

***N*-(3-((4-Chloro-6-(4-methoxyphenyl)-1,3,5-triazin-2-yl)oxy)phenyl)-4-chloro-6-(4-methoxyphenyl)-1,3,5-triazin-2-amine 3i:** white solid, 570.9 mg, 52% yield, mp 90 - 92 °C. <sup>1</sup>H NMR (400 MHz, Acetone-*d*<sub>6</sub>)  $\delta$  (ppm): 9.68 (brs, 1H), 8.37 - 8.33 (m, 4H), 8.02 (br, 1H), 7.81 (d, *J* = 8.0 Hz, 1H), 7.57 (t, *J* = 8.0 Hz, 1H), 7.17 (dd, *J* = 8.0, 2.4 Hz, 1H), 7.06 (d, *J* = 8.4 Hz, 2H), 6.99 (br, 2H), 3.90 (s, 3H), 3.88 (s, 3H). <sup>13</sup>C NMR (100 MHz, Acetone-*d*<sub>6</sub>)  $\delta$  (ppm): 175.5, 173.1, 172.3, 165.6, 165.5, 164.8, 153.1, 140.5, 140.4, 132.2, 131.7, 130.7, 127.7, 126.8, 119.3, 119.2, 117.7, 115.1, 114.8, 56.0, 55.8. IR (KBr)  $\nu$ : 3391, 3318, 1608, 1570, 1544 cm<sup>-1</sup>. HRMS (TOF-ESI) *m/z* [M+H]<sup>+</sup> calcd. for C<sub>26</sub>H<sub>20</sub>Cl<sub>2</sub>N<sub>7</sub>O<sub>3</sub>: 548.0999; Found: 548.1005.

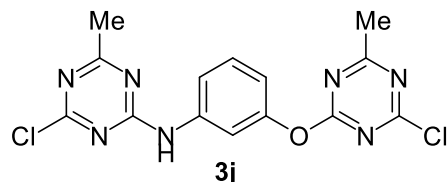

***N*-(3-((4-Chloro-6-methyl-1,3,5-triazin-2-yl)oxy)phenyl)-4-chloro-6-methyl-1,3,5-triazin-2-amine 3j:** white solid, 580.4 mg, 80% yield, mp 113 - 114 °C. <sup>1</sup>H NMR (400 MHz, Acetone-*d*<sub>6</sub>)  $\delta$  (ppm): 9.57 (brs, 1H), 7.86 (brs, 1H), 7.72 (d, *J* = 8.4 Hz, 1H), 7.48 (t, *J* = 8.0 Hz, 1H), 7.07 (d, *J* = 8.0 Hz, 1H), 2.52 (s, 3H), 2.42 (s, 3H). <sup>13</sup>C NMR (150 MHz, benzene-*d*<sub>6</sub>)  $\delta$  (ppm): 181.5, 172.9,

171.4, 164.3, 152.3, 139.0, 129.9, 128.4, 118.21, 117.2, 113.9, 24.9. IR (KBr)  $\nu$ : 3384, 3278, 1610, 1566, 1543  $\text{cm}^{-1}$ . HRMS (TOF-ESI)  $m/z$   $[M+H]^+$  calcd. for  $\text{C}_{14}\text{H}_{12}\text{Cl}_2\text{N}_7\text{O}$ : 364.0474; Found: 364.0478.

## 5. Synthesis of $N^1, N^3$ -dimethyl-2-benzyloxy-5-(*t*-butyl)benzene-1,3-diamines (monomers)

The compounds **4** were prepared based on the reported method for the preparation of **4a** [4]. (Ref. [4]. Tong, S.; Li, J. -T.; Liang, D. -D.; Zhang, Y. -E.; Feng, Q. -Y.; Zhang, X.; Zhu, J. -P.; Wang, M. -X. Catalytic enantioselective synthesis and switchable chiroptical property of inherently chiral macrocycles. *J. Am. Chem. Soc.* **2020**, *142*, 14432–14436.)

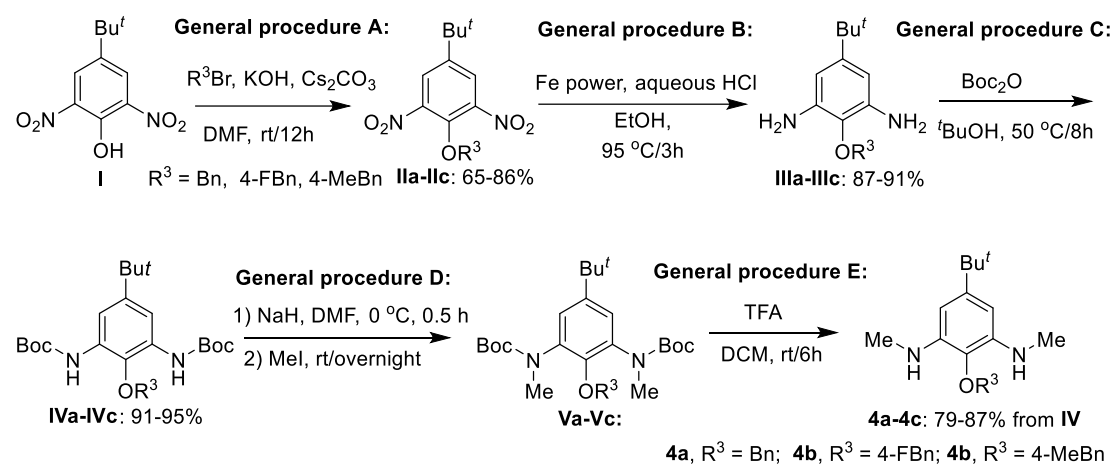

Scheme S4

### General procedure A:

At ambient temperature, 4-(*t*-butyl)-2,6-dinitrophenol **I** (7.21 g, 30 mmol), KOH (3.37 g, 60 mmol) and  $\text{Cs}_2\text{CO}_3$  (977.5 mg, 3 mmol) were mixed in a flask. The flask was then evacuated and backfilled with nitrogen gas. Under the protection of  $\text{N}_2$  atmosphere, the solution of benzyl bromides (90 mmol) in dry DMF (250 mL) was added to flask. The resulting reaction mixture was kept stirring at room temperature for 12 h until the starting material was consumed completely (monitored by TLC). The reaction mixture was added water (100 mL) and then was extracted with ethyl acetate ( $200 \times 3$  mL). The combined organic layer was washed with saturated aqueous NaCl ( $200 \times 3$  mL) and dried over anhydrous  $\text{Na}_2\text{SO}_4$ . After filtration of  $\text{Na}_2\text{SO}_4$  and evaporation of solvents under vacuum. The residue was chromatographed on a silica gel column eluting with a mixture of petroleum ether and ethyl acetate (PE:EA = 20:1) to give 2-benzyloxy-5-(*t*-butyl)-1,3-dinitrobenzenes **IIa-IIc**.

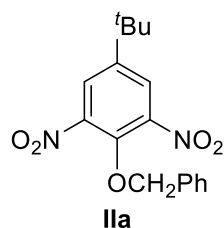

**2-(Benzyloxy)-5-(*t*-butyl)-1,3-dinitrobenzene IIa:** yellow solid, 8.49 g, 86% yield, mp 98 - 99 °C. <sup>1</sup>H NMR (600 MHz, CDCl<sub>3</sub>)  $\delta$  (ppm): 8.06 (s, 2H), 7.48 (dd,  $J$  = 8.4, 2.4 Hz, 2H), 7.42-7.38 (m, 3H), 5.20 (s, 2H), 1.39 (s, 9H). <sup>13</sup>C NMR (150 MHz, CDCl<sub>3</sub>)  $\delta$  (ppm): 149.0, 145.5, 143.5, 134.9, 129.2, 129.1, 128.8, 126.4, 79.1, 35.3, 30.9. IR (KBr)  $\nu$ : 1561, 1533 cm<sup>-1</sup>. HRMS (TOF-ESI)  $m/z$  [M+Na]<sup>+</sup> calcd. for C<sub>17</sub>H<sub>18</sub>N<sub>2</sub>O<sub>5</sub>Na: 353.1107; Found: 353.1106.

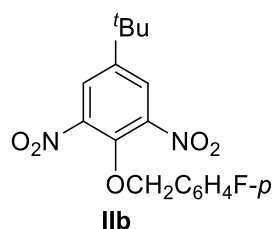

**5-(*t*-Butyl)-2-((4-fluorobenzyl)oxy)-1,3-dinitrobenzene IIb:** white solid, 6.78 g, 65% yield, mp 93 - 94 °C. <sup>1</sup>H NMR (600 MHz, CDCl<sub>3</sub>)  $\delta$  (ppm): 8.06 (s, 2H), 7.47 (dd,  $J$  = 9.0, 5.4 Hz, 2H), 7.08 (t,  $J$  = 8.4 Hz, 2H), 5.16 (s, 2H), 1.39 (s, 9H). <sup>13</sup>C NMR (150 MHz, CDCl<sub>3</sub>)  $\delta$  (ppm): 163.3 (d,  $J$  = 246.0 Hz), 149.2, 145.6, 143.4, 131.3 (d,  $J$  = 9.0 Hz), 130.9 (d,  $J$  = 3.0 Hz), 126.5, 115.7 (d,  $J$  = 22.5 Hz), 78.3, 35.4, 30.9. IR (KBr)  $\nu$ : 1601, 1533, 1514 cm<sup>-1</sup>. HRMS (TOF-ESI)  $m/z$  [M+Na]<sup>+</sup> calcd. for C<sub>17</sub>H<sub>17</sub>FN<sub>2</sub>O<sub>5</sub>Na: 371.1013; Found: 371.1020.

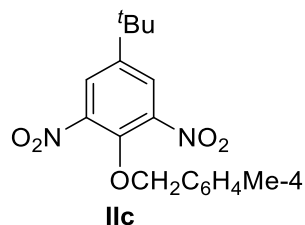

**5-(*t*-Butyl)-2-((4-methylbenzyl)oxy)-1,3-dinitrobenzene IIc:** white solid, 8.86 g, 86% yield, mp 67 - 69 °C. <sup>1</sup>H NMR (600 MHz, CDCl<sub>3</sub>)  $\delta$  (ppm): 8.04 (s, 2H), 7.37 (d,  $J$  = 7.8 Hz, 2H), 7.20 (d,  $J$  = 7.8 Hz, 2H), 5.16 (s, 2H), 2.37 (s, 3H), 1.39 (s, 9H). <sup>13</sup>C NMR (150 MHz, CDCl<sub>3</sub>)  $\delta$  (ppm): 148.8, 145.6, 143.6, 139.1, 131.9, 129.5, 129.4, 126.3, 79.2, 35.4, 31.0, 21.4. IR (KBr)  $\nu$ : 1620, 1539, 1521 cm<sup>-1</sup>. HRMS (TOF-ESI)  $m/z$  [M+Na]<sup>+</sup> calcd. for C<sub>18</sub>H<sub>20</sub>N<sub>2</sub>O<sub>5</sub>Na: 367.1264; Found: 367.1261.

#### General procedure B:

At ambient temperature, the 2-benzyloxy-5-(*t*-butyl)-1,3-dinitrobenzenes **II** (6 mmol), ethanol (50 mL), water (10 mL) and concentrated HCl (12 M, 0.3 mL) were mixed in a test tube, and then iron powder (7 g) was added portionwise with stirring. The resulting mixture was heated for 3h at 95 °C or for 5h at 60 °C in an oil bath (see Scheme S4). After being cooled to room temperature, the

solids in reaction mixture were filtrated and washed with DCM (20 mL). The combined filtrate was concentrated under reduced pressure. The residue was dissolved in DCM (200 mL) and this solution was washed with saturated aqueous solution of sodium chloride (30 × 2 mL). The organic layer was dried over anhydrous sodium sulfate. After filtration of Na<sub>2</sub>SO<sub>4</sub> and removal of DCM, the residue was chromatographed on a silica gel column eluting with a mixture of petroleum ether and ethyl acetate (PE:EA = 10:1) to give 2-benzyloxy-5-(*t*-butyl)benzene-1,3-diamines **IIIa-IIIc**.

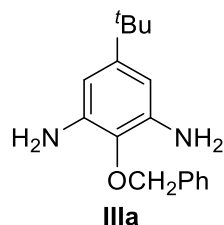

**2-(Benzyloxy)-5-(*t*-butyl)benzene-1,3-diamine IIIa:** white solid, 1.47 g, 91% yield, mp 111 - 112 °C. <sup>1</sup>H NMR (600 MHz, CDCl<sub>3</sub>) δ (ppm): 7.49 (d, *J* = 6.6 Hz, 2H), 7.40 (t, *J* = 7.2 Hz, 2H), 7.35 (t, *J* = 7.2 Hz, 1H), 6.26 (s, 2H), 4.90 (s, 2H), 3.75 (brs, 4H), 1.25 (s, 9H). <sup>13</sup>C NMR (150 MHz, CDCl<sub>3</sub>) δ (ppm): 148.5, 139.4, 138.0, 132.3, 128.8, 128.3, 128.2, 104.4, 73.1, 34.4, 31.5. IR (KBr) ν: 3447, 3354, 3340, 1613, 1595 cm<sup>-1</sup>. HRMS (TOF-ESI) *m/z* [M+H]<sup>+</sup> calcd. for C<sub>17</sub>H<sub>23</sub>N<sub>2</sub>O: 271.1804; Found: 271.1813.

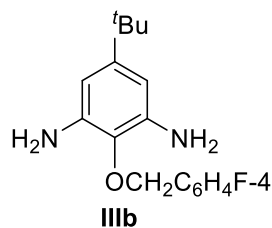

**5-(*t*-Butyl)-2-((4-fluorobenzyl)oxy)benzene-1,3-diamine IIIb:** white solid, 1.50 g, 87% yield, mp 106 - 107 °C. <sup>1</sup>H NMR (600 MHz, CDCl<sub>3</sub>) δ (ppm): 7.45 (dd, *J* = 8.4, 5.4 Hz, 2H), 7.09 (t, *J* = 8.4 Hz, 2H), 6.25 (s, 2H), 4.87 (s, 2H), 3.67 (brs, 4H), 1.27 (s, 9H). <sup>13</sup>C NMR (150 MHz, CDCl<sub>3</sub>) δ (ppm): 162.7 (d, *J* = 244.5 Hz), 148.5, 139.4, 133.8, 132.0, 130.0 (d, *J* = 7.5 Hz), 115.6 (d, *J* = 22.5 Hz), 104.2, 72.3, 34.4, 31.5. IR (KBr) ν: 3454, 3367, 1610 cm<sup>-1</sup>. HRMS (TOF-ESI) *m/z* [M+H]<sup>+</sup> calcd. for C<sub>17</sub>H<sub>22</sub>FN<sub>2</sub>O: 289.1710; Found: 289.1711.

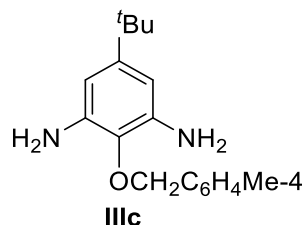

**5-(*t*-Butyl)-2-((4-methylbenzyl)oxy)benzene-1,3-diamine IIIc:** pale yellow solid, 1.50 g, 88% yield, mp 126 - 127 °C. <sup>1</sup>H NMR (600 MHz, CDCl<sub>3</sub>) δ (ppm): 7.38 (d, *J* = 6.6 Hz, 2H), 7.22 (d, *J* = 6.6 Hz, 2H), 6.25 (s, 2H), 4.86 (s, 2H), 3.68 (brs, 4H), 2.39 (s, 3H), 1.27 (s, 9H). <sup>13</sup>C NMR (150 MHz, CDCl<sub>3</sub>) δ (ppm): 148.4, 139.5, 138.1, 135.0, 132.3, 129.4, 128.3, 104.2, 73.0, 34.4, 31.5, 21.4.

IR (KBr)  $\nu$ : 3463, 3374, 1610  $\text{cm}^{-1}$ . HRMS (TOF-ESI)  $m/z$   $[\text{M}+\text{H}]^+$  calcd. for  $\text{C}_{18}\text{H}_{25}\text{N}_2\text{O}$ : 285.1961; Found: 285.1963.

### General procedure C:

2-Benzyloxy-5-(*t*-butyl)benzene-1,3-diamines **III** (3 mmol),  $\text{Boc}_2\text{O}$  (2.60 g, 12 mmol) and *t*-BuOH (50 mL) were mixed in a flask. The mixture was warmed for 8 h at 50 °C oil bath temperature. Then solvent was evaporated under vacuum and the residue was dissolved in DCM (50 mL). The resulting solution was washed with saturated aqueous  $\text{NaHCO}_3$  ( $30 \times 2$  mL) and saturated aqueous NaCl ( $30 \times 2$  mL). After being dried and removal of solvent, the di(*t*-butyl) 1,3-(2-benzyloxy-5-(*t*-butyl)phenylene)dicarbamates **IVa-IVc** were isolated by chromatography on a silica gel column eluting with a mixture of petroleum ether and ethyl acetate (PE:EA = 10:1).

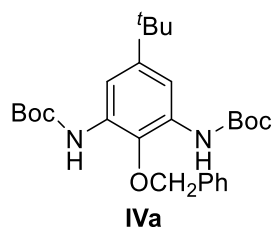

**Di(*t*-butyl) (2-(benzyloxy)-5-(*t*-butyl)-1,3-phenylene)dicarbamate IVa:** white solid, 1.31 g, 93% yield, m p 128 - 129 °C.  $^1\text{H}$  NMR (600 MHz,  $\text{CDCl}_3$ )  $\delta$  (ppm): 7.75 (brs, 2H), 7.44 - 7.40 (m, 5H), 6.75 (brs, 2H), 4.81 (s, 2H), 1.51 (s, 18H), 1.34 (s, 9H).  $^{13}\text{C}$  NMR (150 MHz,  $\text{CDCl}_3$ )  $\delta$  (ppm): 152.7, 148.5, 136.4, 134.6, 131.1, 129.11, 129.06, 128.8, 110.9, 80.5, 76.1, 35.2, 31.6, 28.5. IR (KBr)  $\nu$ : 3424, 3330, 1732, 1699, 1605  $\text{cm}^{-1}$ . HRMS (TOF-ESI)  $m/z$   $[\text{M}+\text{H}]^+$  calcd. for  $\text{C}_{27}\text{H}_{39}\text{N}_2\text{O}_5$ : 471.2853; Found: 471.2849.

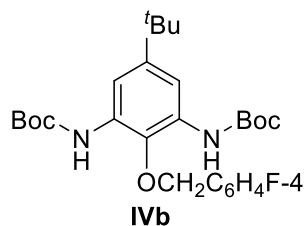

**Di(*t*-butyl) (5-(*t*-butyl)-2-((4-fluorobenzyl)oxy)-1,3-phenylene)dicarbamate IVb:** white solid, 1.39g, 95% yield, mp 129 - 130 °C.  $^1\text{H}$  NMR (600 MHz,  $\text{CDCl}_3$ )  $\delta$  (ppm): 7.73 (brs, 2H), 7.38 (dd,  $J = 8.4, 5.4$  Hz, 2H), 7.10 (t,  $J = 8.4$  Hz, 2H), 6.66 (s, 2H), 4.79 (s, 2H), 1.51 (s, 18H), 1.33 (s, 9H).  $^{13}\text{C}$  NMR (150 MHz,  $\text{CDCl}_3$ )  $\delta$  (ppm): 163.2 (d,  $J = 246.0$  Hz), 152.7, 148.7, 134.4, 132.4 (d,  $J = 4.5$  Hz), 131.1, 130.9 (d,  $J = 9.0$  Hz), 116.1 (d,  $J = 21.0$  Hz), 111.0, 80.6, 75.4, 35.2, 31.6, 28.5. IR (KBr)  $\nu$ : 3428, 3332, 1732, 1700, 1604  $\text{cm}^{-1}$ . HRMS (TOF-ESI)  $m/z$   $[\text{M}+\text{H}]^+$  calcd. for  $\text{C}_{27}\text{H}_{38}\text{FN}_2\text{O}_5$ : 489.2759; Found: 489.2763.

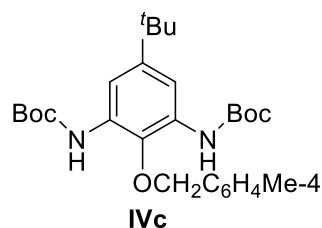

**Di(*t*-butyl) (5-(*t*-butyl)-2-((4-methylbenzyl)oxy)-1,3-phenylene)dicarbamate IVc:** white solid, 1.32 g, 91% yield, mp 143 - 144 °C. <sup>1</sup>H NMR (600 MHz, CDCl<sub>3</sub>) δ (ppm): 7.74 (brs, 2H), 7.32 (d, *J* = 8.4 Hz, 2H), 7.23 (d, *J* = 7.2 Hz, 2H), 6.74 (s, 2H), 4.77 (s, 2H), 2.39 (s, 3H), 1.51 (s, 18H), 1.33 (s, 9H). <sup>13</sup>C NMR (150 MHz, CDCl<sub>3</sub>) δ (ppm): 152.7, 148.5, 138.9, 134.6, 133.5, 131.2, 129.8, 129.0, 110.8, 80.4, 76.0, 35.2, 31.6, 28.5, 21.4. IR (KBr) ν: 3422, 3330, 1732, 1700, 1605, 1552 cm<sup>-1</sup>. HRMS (TOF-ESI) *m/z* [M+H]<sup>+</sup> calcd. for C<sub>28</sub>H<sub>41</sub>N<sub>2</sub>O<sub>5</sub>: 485.3009; Found: 485.2997.

#### General procedure D:

At 0 °C, the 1,3-(2-benzyloxy-5-(*t*-butyl)phenylene)dicarbamates **IVa-IVc** (3 mmol) was added to a stirred suspension of NaH (12 mmol, 480 mg of 60% dispersion in mineral oil). The mineral oil was removed by washing with *n*-hexane) in dry DMF (30 mL). After being stirred at 0 °C for 0.5 h, MeI (1.70 g, 12 mmol) was added dropwise. The resulting mixture was then stirred at room temperature until the starting material was consumed completely (monitored by TLC). The reaction was quenched with ice water and the mixture was extracted with DCM (100 × 3 mL). The combined organic layers were washed with saturated aqueous NaCl (100 × 5 mL) and dried over anhydrous Na<sub>2</sub>SO<sub>4</sub>. After filtration and concentration under vacuo, the crude di(*t*-butyl) 1,3-(2-benzyloxy-5-(*t*-butyl)phenylene)bis(methylcarbamates) **Va-Vc** were obtained, which were used for next step without further purification.

#### General procedure E:

The above obtained crude products **Va-Vc**, DCM (30 mL) and TFA (6 mL) were mixed in a flask. The mixture was stirred at room temperature for 6 h. Solvent was removed under vacuum and the residue was dissolved in DCM (50 mL). The resulting solution was washed with saturated aqueous Na<sub>2</sub>CO<sub>3</sub> solution and brine, and dried over anhydrous Na<sub>2</sub>SO<sub>4</sub>. After solvent evaporation, the residue was chromatographed on a silica gel column eluting with a mixture of petroleum ether and ethyl acetate (PE:EA = 20:1) to give *N*<sup>1</sup>,*N*<sup>3</sup>-dimethyl-2-benzyloxy-5-(*t*-butyl)benzene-1,3-diamines **4a-4c**.

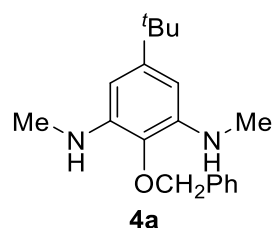

***N*<sup>1</sup>,*N*<sup>3</sup>-Dimethyl-2-(benzyloxy)-5-(*t*-butyl)benzene-1,3-diamine 4a<sup>4</sup>:** red solid, 781.6 mg, 87%

yield, mp 46 - 47 °C.  $^1\text{H}$  NMR (400 MHz,  $\text{CDCl}_3$ )  $\delta$  (ppm): 7.51 (d,  $J$  = 5.2 Hz, 2H), 7.45 (t,  $J$  = 7.6 Hz, 2H), 7.39 (t,  $J$  = 7.6 Hz, 1H), 6.23 (s, 2H), 4.87 (s, 2H), 4.03 (br, 2H), 2.87 (s, 6H), 1.39 (s, 9H).  $^{13}\text{C}$  NMR (100 MHz,  $\text{CDCl}_3$ )  $\delta$  (ppm): 148.5, 141.8, 138.1, 131.0, 128.7, 128.1, 127.9, 98.6, 72.6, 35.0, 31.7, 31.0. IR (KBr)  $\nu$ : 3426, 1597, 1535  $\text{cm}^{-1}$ .

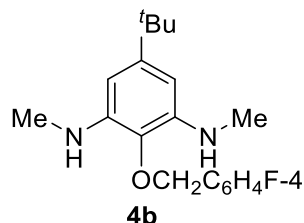

***N*<sup>1</sup>,*N*<sup>3</sup>-Dimethyl-2-((4-fluorobenzyl)oxy)-5-(*t*-butyl)benzene-1,3-diamine 4b**: red solid, 816.7 mg, 86% yield, mp 79 - 80 °C.  $^1\text{H}$  NMR (600 MHz,  $\text{CDCl}_3$ )  $\delta$  (ppm): 7.42 (dd,  $J$  = 8.4, 5.4 Hz, 2H), 7.09 (t,  $J$  = 8.4 Hz, 2H), 6.19 (s, 2H), 4.79 (s, 2H), 2.83 (s, 6H), 1.33 (s, 9H).  $^{13}\text{C}$  NMR (150 MHz,  $\text{CDCl}_3$ )  $\delta$  (ppm): 162.7 (d,  $J$  = 244.5 Hz), 148.7, 141.7, 133.9 (d,  $J$  = 3.0 Hz), 131.0, 129.9 (d,  $J$  = 9.0 Hz), 115.6 (d,  $J$  = 21.0 Hz), 98.8, 72.0, 35.0, 31.7, 31.0. IR (KBr)  $\nu$ : 3426, 1598, 1535  $\text{cm}^{-1}$ . HRMS (TOF-ESI)  $m/z$   $[\text{M}+\text{H}]^+$  calcd. for  $\text{C}_{19}\text{H}_{26}\text{FN}_2\text{O}$ : 317.2023; Found: 317.2027.

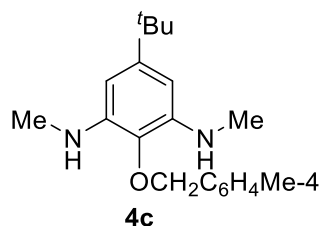

***N*<sup>1</sup>,*N*<sup>3</sup>-Dimethyl-2-((4-methylbenzyl)oxy)-5-(*t*-butyl)benzene-1,3-diamine 4c**: red solid, 740.1 mg, 79% yield, mp 63 - 64 °C.  $^1\text{H}$  NMR (600 MHz,  $\text{CDCl}_3$ )  $\delta$  (ppm): 7.44 (d,  $J$  = 7.8 Hz, 2H), 7.30 (d,  $J$  = 7.8 Hz, 2H), 6.28 (s, 2H), 4.87 (s, 2H), 4.11 (brs, 2H), 2.91 (s, 6H), 2.47 (s, 3H), 1.44 (s, 9H).  $^{13}\text{C}$  NMR (150 MHz,  $\text{CDCl}_3$ )  $\delta$  (ppm): 148.4, 141.8, 137.8, 135.1, 131.0, 129.3, 128.0, 98.4, 72.6, 34.9, 31.7, 30.9, 21.3. IR (KBr)  $\nu$ : 3424, 1597, 1534  $\text{cm}^{-1}$ . HRMS (TOF-ESI)  $m/z$   $[\text{M}+\text{H}]^+$  calcd. for  $\text{C}_{20}\text{H}_{29}\text{N}_2\text{O}$ : 313.2274; Found: 313.2279.

## 6. Synthesis of *N*<sup>1</sup>-(4-(3-((6-(alkoxy, alkyl, aryl)-4-chloro-1,3,5-triazin-2-yl)amino)phenoxy)-6-(alkoxy, alkyl, aryl)-1,3,5-triazin-2-yl)-*N*<sup>3</sup>-dimethyl-2-(benzyloxy)-5-(*t*-butyl)benzene-1,3-diamines (tetramers)

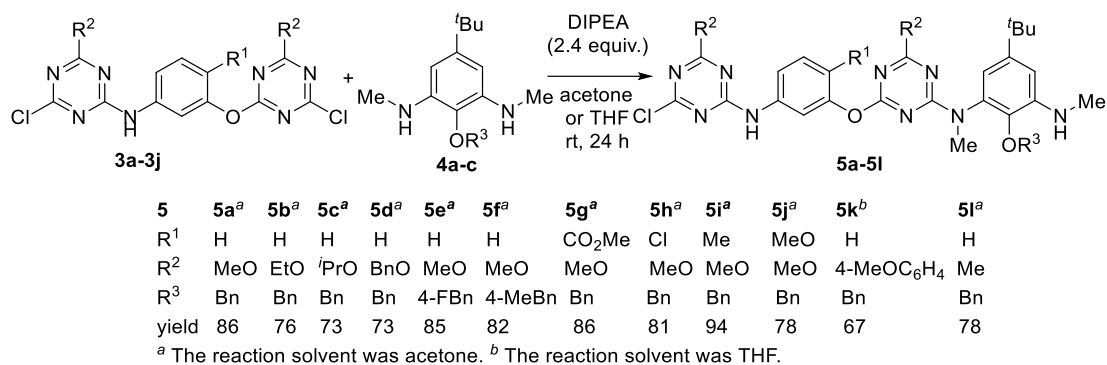

Scheme S5

In a flask, trimers **3** (0.5 mmol), *N*<sup>1</sup>,*N*<sup>3</sup>-dimethyl-5-(*t*-butyl)-2-(benzyloxy)benzene-1,3-diamine **4** (0.5 mmol), DIPEA (1.2 mmol, 2.4 equiv.) and acetone or THF (20 mL) were added successively (Note: Acetone was employed as the solvent for all reactions, except the one between **3i** and **4a** which was conducted in THF due to the low solubility of **3i** in acetone). The resulting mixture was stirred for 24h at ambient temperature. Then the reaction was stopped by removal of solvent under vacuum. The residue was chromatographed on a silica gel column eluting with a mixture of petroleum ether and ethyl acetate (PE:EA from 6:1 to 3:1 for **5a-5d**; PE:EA from 3:1 to 2:1 for **5e-5l**) to give products **5** in 67-94% yields.

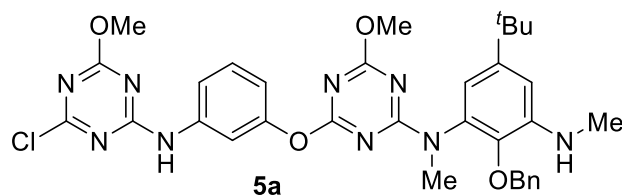

*N*<sup>1</sup>-(4-(3-((4-Chloro-6-methoxy-1,3,5-triazin-2-yl)amino)phenoxy)-6-methoxy-1,3,5-triazin-2-yl)-*N*<sup>3</sup>-dimethyl-2-(benzyloxy)-5-(*t*-butyl)benzene-1,3-diamine **5a**: white solid, 282.0 mg, 86% yield, mp 83 - 84 °C. <sup>1</sup>H NMR (400 MHz, CDCl<sub>3</sub>) (two rotamers 0.5:0.5) δ (ppm): 7.61 - 7.49 (m, 2H), 7.38 - 7.26 (m, 6.5H), 7.21 - 7.17 (m, 1.5H), 7.02 (d, *J* = 7.2 Hz, 0.5H), 6.88 (d, *J* = 7.2 Hz, 0.5H), 6.78 (br, 0.5H), 6.72 (br, 0.5H), 6.62 (br, 0.5H), 6.54 (br, 0.5H), 4.75 (s, 1H), 4.69 (s, 1H), 4.01 (s, 1.5H), 4.00 (s, 1.5H), 3.97 (s, 1.5H), 3.68 (s, 1.5H), 3.46 (s, 1.5H), 3.39 (s, 1.5H), 2.82 (s, 3H), 1.30 (s, 4.5H), 1.24 (s, 4.5H). <sup>13</sup>C NMR (100 MHz, CDCl<sub>3</sub>) δ (ppm): 172.6, 172.0, 171.9, 171.4, 170.9, 170.6, 167.73, 167.66, 165.08, 165.05, 152.4, 152.3, 148.4, 148.0, 138.1, 137.5, 136.9, 136.8, 135.8, 129.4, 129.0, 128.4, 128.24, 128.16, 127.9, 117.9, 114.6, 75.3, 55.5, 54.8, 54.6, 37.9, 37.8, 34.74, 34.68, 31.34, 31.27. IR (KBr) ν: 1574, 1481 cm<sup>-1</sup>. HRMS (APCI) *m/z* [M+H]<sup>+</sup> calcd. for C<sub>33</sub>H<sub>37</sub>ClN<sub>9</sub>O<sub>4</sub>: 658.2652; Found: 658.2647.

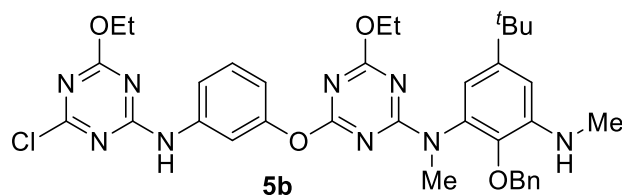

***N*<sup>1</sup>-(4-(3-((4-Chloro-6-ethoxy-1,3,5-triazin-2-yl)amino)phenoxy)-6-ethoxy-1,3,5-triazin-2-yl)-*N*<sup>1</sup>,*N*<sup>3</sup>-dimethyl-2-(benzyloxy)-5-(*t*-butyl)benzene-1,3-diamine **5b**:** white solid, 261.3 mg, 76% yield, mp 75 - 76 °C. <sup>1</sup>H NMR (400 MHz, CDCl<sub>3</sub>) (two rotamers 0.5:0.5)  $\delta$  (ppm): 8.42 - 8.36 (br, 0.5H), 8.11 - 8.00 (br, 0.5H), 7.60 (s, 0.5H), 7.36 (brs, 0.5H), 7.27-7.17 (m, 6.5H), 7.13-7.09 (m, 0.5H), 6.93 (d, *J* = 7.6 Hz, 0.5H), 6.83 (d, *J* = 8.0 Hz, 0.5H), 6.67 (s, 0.5H), 6.61 (s, 0.5H), 6.54 (s, 0.5H), 6.49 (s, 0.5H), 4.72 (s, 1H), 4.68 (s, 1H), 4.44-4.31 (m, 3H), 4.10-4.05 (m, 1H), 3.44 (s, 1.5H), 3.39 (s, 1.5H), 2.79 (s, 3H), 1.37 (t, *J* = 7.2 Hz, 1.5H), 1.31 (t, *J* = 7.2 Hz, 3H), 1.27 (s, 4.5H), 1.22 (s, 4.5H), 1.12 (t, *J* = 7.2 Hz, 1.5H). <sup>13</sup>C NMR (100 MHz, CDCl<sub>3</sub>)  $\delta$  (ppm): 172.0, 171.3, 170.7, 170.5, 167.72, 167.65, 165.0, 164.9, 152.4, 152.3, 148.1, 147.7, 142.8, 139.6, 139.5, 138.2, 137.4, 137.1, 135.4, 135.3, 129.2, 128.8, 128.4, 128.1, 128.03, 127.95, 127.8, 117.8, 117.7, 117.5, 114.6, 114.4, 113.9, 113.5, 107.7, 107.2, 74.8, 74.6, 64.6, 63.6, 63.4, 37.9, 37.8, 34.60, 34.58, 31.4, 31.3, 14.3, 14.1, 14.0. IR (KBr)  $\nu$ : 1599, 1574, 1560 cm<sup>-1</sup>. HRMS (TOF-ESI) *m/z* [M+H]<sup>+</sup> calcd. for C<sub>35</sub>H<sub>40</sub>ClN<sub>9</sub>O<sub>4</sub>: 686.2965; Found: 686.2955.

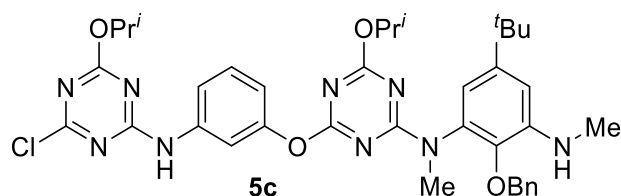

***N*<sup>1</sup>-(4-(3-((4-Chloro-6-isopropoxy-1,3,5-triazin-2-yl)amino)phenoxy)-6-isopropoxy-1,3,5-triazin-2-yl)-*N*<sup>1</sup>,*N*<sup>3</sup>-dimethyl-2-(benzyloxy)-5-(*t*-butyl)-benzene-1,3-diamine **5c**:** white solid, 260.1 mg, 73% yield, mp 86 - 87 °C. <sup>1</sup>H NMR (400 MHz, CDCl<sub>3</sub>) (two rotamers 0.5:0.5)  $\delta$  (ppm): 8.06 (s, 0.5H), 7.81 (s, 0.5H), 7.57 (s, 0.5H), 7.43 (brs, 0.5H), 7.33-7.27 (m, 6.5H), 7.21-7.15 (m, 1.5H), 6.98 (d, *J* = 7.6 Hz, 0.5H), 6.87 (d, *J* = 6.8 Hz, 0.5H), 6.70 (br, 0.5H), 6.62 (s, 0.5H), 6.53 (s, 0.5H), 6.49 (s, 0.5H), 5.36 - 5.30 (m, 0.5H), 5.24 (br, 1H), 4.90 - 4.84 (m, 0.5H), 4.73 (s, 1H), 4.69 (s, 1H), 3.46 (s, 1.5H), 3.41 (s, 1.5H), 2.82 (s, 3H), 1.39 (d, *J* = 6.4 Hz, 3H), 1.35 - 1.32 (m, 6H), 1.30 (s, 4.5H), 1.24 (s, 4.5H), 1.15 (d, *J* = 6.0 Hz, 3H). <sup>13</sup>C NMR (150 MHz, CDCl<sub>3</sub>)  $\delta$  (ppm): 172.1, 171.8, 171.1, 170.8, 167.94, 167.89, 165.3, 165.2, 152.7, 152.6, 148.3, 147.9, 143.1, 139.7, 138.2, 137.5, 137.4, 135.7, 135.5, 129.5, 129.0, 128.6, 128.3, 128.1, 128.0, 118.1, 117.7, 117.5, 114.7, 114.5, 113.7, 107.8, 107.3, 74.9, 74.8, 72.5, 71.1, 71.0, 38.0, 37.9, 34.8, 31.5, 31.4, 22.0, 21.73, 21.69. IR (KBr)  $\nu$ : 1574, 1526 cm<sup>-1</sup>. HRMS (TOF-ESI) *m/z* [M+H]<sup>+</sup> calcd. for C<sub>37</sub>H<sub>45</sub>ClN<sub>9</sub>O<sub>4</sub>: 714.3277; Found: 714.3273.

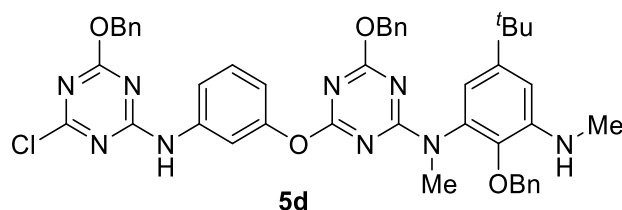

***N*<sup>1</sup>-(4-(Benzyloxy)-6-(3-((4-(benzyloxy)-6-chloro-1,3,5-triazin-2-yl)amino)phenoxy)-1,3,5-triazin-2-yl)-*N*<sup>1</sup>,*N*<sup>3</sup>-dimethyl-2-(benzyloxy)-5-(*t*-butyl)benzene-1,3-diamine **5d**:** white solid,

294.2 mg, 73% yield, mp 78 - 79 °C. <sup>1</sup>H NMR (400 MHz, CDCl<sub>3</sub>) (two rotamers 0.63:0.37) δ (ppm): 8.27 (brs, 0.63H), 8.01 (brs, 0.37H), 7.50 - 7.13 (m, 13H), 7.19 - 7.13 (m, 5H), 6.96 (d, *J* = 7.6 Hz, 2H), 6.75 (s, 1H), 6.64 (s, 0.63H), 6.53 (s, 0.37H), 5.42 - 5.28 (m, 2.74H), 5.10 (d, *J* = 12.0 Hz, 0.63H), 5.00 (d, *J* = 12.0 Hz, 0.63H), 4.70 (brs, 0.74H), 4.46 (d, *J* = 10.8 Hz, 0.63H), 4.33 (d, *J* = 11.2 Hz, 0.63 H), 3.47 (s, 1.1H), 3.40 (s, 1.9H), 2.92 (s, 1.9H), 2.82 (s, 1.1H), 1.37 (s, 5.7H), 1.25 (s, 3.3H). <sup>13</sup>C NMR (100 MHz, CDCl<sub>3</sub>) δ (ppm): 172.1, 172.0, 171.2, 170.8, 167.8, 167.7, 165.2, 165.0, 152.5, 152.4, 148.3, 148.1, 140.1, 138.1, 137.3, 137.2, 136.1, 136.0, 135.53, 135.45, 135.2, 129.4, 129.1, 128.9, 128.6, 128.54, 128.47, 128.44, 128.23, 128.16, 128.12, 128.0, 127.9, 127.8, 118.2, 118.0, 114.8, 108.2, 107.3, 75.0, 74.5, 70.0, 69.3, 69.2, 38.1, 37.6, 34.9, 34.7, 31.6, 31.4. IR (KBr) ν 3273, 1605, 1578 cm<sup>-1</sup>. HRMS (TOF-ESI) *m/z* [M+H]<sup>+</sup> calcd. for C<sub>45</sub>H<sub>45</sub>ClN<sub>9</sub>O<sub>4</sub>: 810.3278; Found: 810.3155.

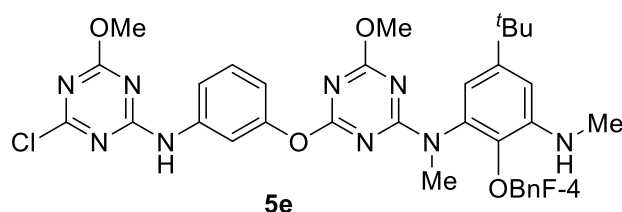

*N*<sup>1</sup>-(4-(3-((4-Chloro-6-methoxy-1,3,5-triazin-2-yl)amino)phenoxy)-6-methoxy-1,3,5-triazin-2-yl)-*N*<sup>3</sup>-dimethyl-5-(*t*-butyl)-2-((4-fluorobenzyl)oxy)benzene-1,3-diamine **5e**: white solid, 286.1 mg, 85% yield, mp 89 - 90 °C. <sup>1</sup>H NMR (400 MHz, CDCl<sub>3</sub>) (two rotamers 0.5:0.5) δ (ppm): 8.26 (br, 0.5H), 7.96 (br, 0.5H), 7.58 (s, 0.5H), 7.43 (br, 0.5H), 7.29 - 7.22 (m, 3.5H), 7.15 - 7.12 (m, 1.5H), 7.00 - 6.90 (m, 2.5H), 6.84 (d, *J* = 7.6 Hz, 0.5H), 6.68 (brs, 0.5H), 6.62 (s, 0.5H), 6.56 (s, 0.5H), 6.49 (s, 0.5H), 4.69 (s, 1H), 4.64 (s, 1H), 3.97 (s, 1.5H), 3.92 (s, 3H), 3.65 (s, 1.5H), 3.43 (s, 1.5H), 3.37 (s, 1.5H), 2.80 (s, 3H), 1.28 (s, 4.5H), 1.23 (s, 4.5H). <sup>13</sup>C NMR (150 MHz, CDCl<sub>3</sub>) δ (ppm): 172.7, 172.1, 172.0, 171.5, 170.9, 167.9, 167.8, 165.2, 163.44, 163.42, 161.81, 161.78, 152.5, 148.5, 148.1, 140.0, 138.1, 137.5, 135.7, 135.5, 133.1, 130.1, 130.0, 129.9, 129.8, 129.5, 129.1, 118.1, 117.9, 117.7, 115.4, 115.3, 114.7, 114.4, 74.3, 74.2, 55.6, 54.9, 54.6, 37.92, 37.86, 34.80, 34.76, 31.5, 31.4. IR (KBr) ν: 1568, 1562, 1533 cm<sup>-1</sup>. HRMS (TOF-ESI) *m/z* [M+H]<sup>+</sup> calcd. for C<sub>33</sub>H<sub>36</sub>ClFN<sub>9</sub>O<sub>4</sub>: 676.2557; Found: 676.2561.

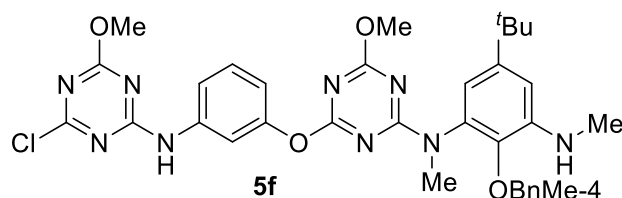

*N*<sup>1</sup>-(4-(3-((4-Chloro-6-methoxy-1,3,5-triazin-2-yl)amino)phenoxy)-6-methoxy-1,3,5-triazin-2-yl)-*N*<sup>3</sup>-dimethyl-5-(*t*-butyl)-2-((4-methylbenzyl)oxy)benzene-1,3-diamine **5f**: white solid, 274.1 mg, 82% yield, mp 88 - 82 °C. <sup>1</sup>H NMR (600 MHz, CDCl<sub>3</sub>) (two rotamers 0.5:0.5) δ (ppm): 8.15 (s, 0.5H), 7.91 (brs, 0.5H), 7.60 (s, 0.5H), 7.43 (br, 0.5H), 7.32 - 7.26 (m, 2.5H), 7.17 (d, *J* = 7.8 Hz, 1H), 7.13 (d, *J* = 7.8 Hz, 0.5H), 7.11 (d, *J* = 7.8 Hz, 1H), 7.07 (s, 2H), 6.98 (d, *J* = 7.8 Hz, 0.5H), 6.85 (d, *J* = 8.4 Hz, 0.5H), 6.72 (brs, 0.5H), 6.66 (brs, 0.5H), 6.59 (s, 0.5H), 6.51 (s, 0.5H),

4.69 (s, 1H), 4.65 (s, 1H), 3.99 (s, 1.5H), 3.95 (brs, 1.5H), 3.93 (s, 1.5H), 3.66 (s, 1.5H), 3.46 (s, 1.5H), 3.40 (s, 1.5H), 2.80 (s, 3H), 2.32 (s, 1.5H), 2.29 (s, 1.5H), 1.29 (s, 4.5H), 1.23 (s, 4.5H).  $^{13}\text{C}$  NMR (150 MHz,  $\text{CDCl}_3$ )  $\delta$  (ppm): 172.8, 172.1, 172.0, 170.9, 167.9, 167.8, 165.3, 152.7, 148.4, 147.9, 138.2, 138.0, 137.4, 135.7, 134.2, 129.7, 129.3, 129.2, 129.1, 128.4, 128.2, 118.3, 117.8, 114.7, 75.1, 74.9, 55.6, 54.9, 54.6, 37.94, 37.88, 34.83, 34.78, 31.5, 31.4, 21.32, 21.26. IR (KBr)  $\nu$ : 1576, 1559, 1539  $\text{cm}^{-1}$ . HRMS (TOF-ESI)  $m/z$   $[\text{M}+\text{H}]^+$  calcd. for  $\text{C}_{34}\text{H}_{39}\text{ClN}_9\text{O}_4$ : 672.2813; Found: 672.2811.

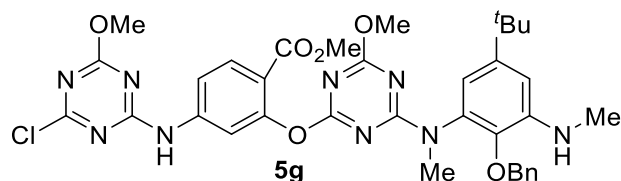

**Methyl 2-((4-((2-(Benzyloxy)-5-(*t*-butyl)-3-(methylamino)phenyl)(methylamino)-6-methoxy-1,3,5-triazin-2-yl)oxy)-4-((4-chloro-6-methoxy-1,3,5-triazin-2-yl)amino)benzoate 5g:** white solid, 307.6 mg, 86% yield, mp 93 - 94 °C.  $^1\text{H}$  NMR (400 MHz,  $\text{CDCl}_3$ ) (two rotamers 0.57:0.43)  $\delta$  (ppm): 7.95 (d,  $J$  = 8.4 Hz, 1H), 7.83 (d,  $J$  = 8.4 Hz, 0.57H), 7.78 (s, 0.43H), 7.60 (s, 0.43H), 7.49 (d,  $J$  = 6.4 Hz, 0.57H), 7.41 (d,  $J$  = 6.4 Hz, 0.43H), 7.35 - 7.26 (m, 6.57H), 6.64 - 6.57 (m, 1.57H), 6.44 (s, 0.43H), 4.72 - 4.68 (m, 1.57H), 4.63 - 4.60 (m, 0.43H), 4.00 - 3.97 (m, 4.3H), 3.68 (s, 1.7H), 3.65 (s, 1.7H), 3.54 (s, 1.3H), 3.42 (s, 3H), 2.81 (s, 1.7H), 2.77 (s, 1.3H), 1.30 (s, 5.1H), 1.20 (s, 3.9H).  $^{13}\text{C}$  NMR (100 MHz,  $\text{CDCl}_3$ )  $\delta$  (ppm): 172.5, 172.3, 171.9, 171.8, 167.8, 165.0, 164.5, 152.5, 148.0, 147.9, 143.1, 142.7, 142.0, 139.9, 139.3, 137.5, 137.2, 135.4, 135.3, 132.4, 132.3, 128.62, 128.55, 128.4, 128.3, 128.2, 128.1, 118.7, 118.5, 117.1, 116.9, 115.33, 115.26, 114.1, 113.4, 107.6, 107.0, 75.0, 74.7, 55.7, 54.9, 54.7, 52.1, 52.0, 38.1, 38.0, 34.8, 34.7, 31.6, 31.4. IR (KBr)  $\nu$ : 1724, 1601, 1572, 1565  $\text{cm}^{-1}$ . HRMS (TOF-ESI)  $m/z$   $[\text{M}+\text{H}]^+$  Calcd. for  $\text{C}_{35}\text{H}_{39}\text{ClN}_9\text{O}_6$ : 716.2706; Found: 716.2711.

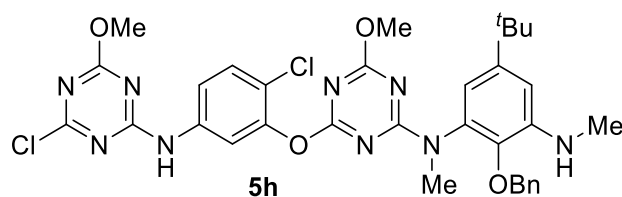

***N*<sup>1</sup>-(4-(2-Chloro-5-((4-chloro-6-methoxy-1,3,5-triazin-2-yl)amino)phenoxy)-6-methoxy-1,3,5-triazin-2-yl)-*N*<sup>3</sup>,*N*<sup>3</sup>-dimethyl-2-(benzyloxy)-5-(*t*-butyl)benzene-1,3-diamine 5h:** white solid, 280.5 mg, 81% yield, mp 104 - 106 °C.  $^1\text{H}$  NMR (600 MHz,  $\text{CDCl}_3$ ) (two rotamers 0.55:0.45)  $\delta$  (ppm): 8.35 - 8.25 (br, 0.55H), 8.09 (br, 0.45H), 7.67 (brs, 0.55H), 7.40 (brs, 0.45H), 7.32 - 7.27 (m, 6.55H), 7.22 (d,  $J$  = 7.2 Hz, 1H), 7.19 (d,  $J$  = 9.0 Hz, 0.45H), 6.63 (s, 0.55H), 6.61 (s, 0.45H), 6.58 (s, 0.55H), 6.48 (s, 0.45H), 4.74 - 4.66 (m, 2H), 3.98 (s, 1.65H), 3.96 (s, 1.35H), 3.91 (s, 1.35H), 3.65 (s, 1.65H), 3.44 (s, 1.35H), 3.41 (s, 1.65H), 2.82 (s, 1.65H), 2.77 (s, 1.35H), 1.30 (s, 4.95H), 1.23 (s, 4.05H).  $^{13}\text{C}$  NMR (150 MHz,  $\text{CDCl}_3$ )  $\delta$  (ppm): 172.5, 171.8, 171.4, 170.9, 170.7, 167.8, 167.7, 165.0, 164.9, 148.2, 148.1, 147.9, 142.8, 139.9, 139.4, 137.3, 137.0, 135.3, 135.2, 130.0,

129.7, 128.48, 128.45, 128.3, 128.0, 127.7, 122.4, 122.3, 119.0, 116.3, 114.0, 108.0, 107.3, 74.9, 74.7, 55.6, 54.9, 54.7, 38.1, 37.9, 34.7, 34.6, 31.4, 31.3. IR (KBr)  $\nu$ : 1602, 1572, 1560  $\text{cm}^{-1}$ . HRMS (TOF-ESI)  $m/z$   $[\text{M}+\text{H}]^+$  calcd. for  $\text{C}_{33}\text{H}_{36}\text{Cl}_2\text{N}_9\text{O}_4$ : 692.2261; Found: 692.2253.

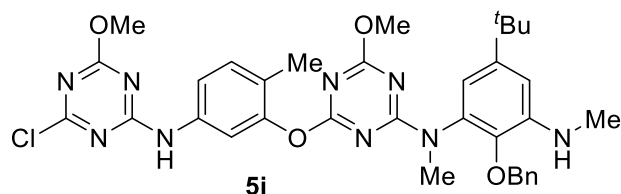

***N*<sup>1</sup>-(4-(5-((4-Chloro-6-methoxy-1,3,5-triazin-2-yl)amino)-2-methylphenoxy)-6-methoxy-1,3,5-triazin-2-yl)-*N*<sup>1</sup>,*N*<sup>3</sup>-dimethyl-2-(benzyloxy)-5-(*t*-butyl)benzene-1,3-diamine 5i**: white solid, 315.5 mg, 94% yield, mp 85 - 86 °C. <sup>1</sup>H NMR (400 MHz,  $\text{CDCl}_3$ ) (two rotamers 0.5:0.5)  $\delta$  (ppm): 8.30 (br, 0.5H), 8.02 (br, 0.5H), 7.41 (s, 1H), 7.26- 7.17 (m, 7H), 7.05 (d,  $J$  = 8.4 Hz, 0.5H), 6.96 (d,  $J$  = 8.0 Hz, 0.5H), 6.63 (s, 1H), 6.57 (s, 0.5H), 6.47 (s, 0.5H), 4.72 - 4.64 (m, 2H), 3.94 (s, 1.5H), 3.91 (s, 1.5H), 3.87 (s, 1.5H), 3.62 (s, 1.5H), 3.42 (s, 1.5H), 3.38 (s, 1.5H), 2.80 (s, 1.5H), 2.76 (s, 1.5H), 2.18 (s, 1.5H), 2.03 (s, 1.5 H), 1.28 (s, 4.5 H), 1.22 (s, 4.5H). <sup>13</sup>C NMR (100 MHz,  $\text{CDCl}_3$ )  $\delta$  (ppm): 172.6, 171.9, 171.8, 171.4, 171.1, 170.5, 167.8, 165.1, 150.6, 148.1, 147.9, 142.8, 139.9, 139.4, 137.3, 137.2, 135.9, 135.43, 135.36, 135.3, 131.0, 130.7, 128.5, 128.23, 128.18, 127.8, 126.9, 118.4, 118.0, 115.1, 114.9, 114.1, 113.6, 107.9, 107.3, 74.8, 74.7, 55.5, 54.8, 54.6, 38.1, 37.9, 34.8, 34.7, 31.5, 31.4, 16.0, 15.9. IR (KBr)  $\nu$ : 1597, 1572, 1560  $\text{cm}^{-1}$ . HRMS (TOF-ESI)  $m/z$   $[\text{M}+\text{H}]^+$  Calcd. For  $\text{C}_{34}\text{H}_{39}\text{ClN}_9\text{O}_4^+$  672.2808; Found: 672.2812.

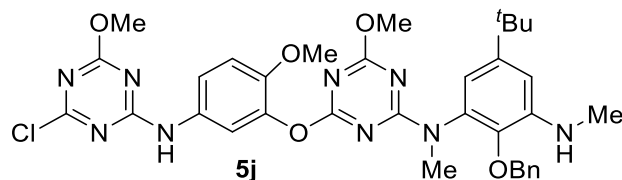

***N*<sup>1</sup>-(4-(5-((4-Chloro-6-methoxy-1,3,5-triazin-2-yl)amino)-2-methoxyphenoxy)-6-methoxy-1,3,5-triazin-2-yl)-*N*<sup>1</sup>,*N*<sup>3</sup>-dimethyl-2-(benzyloxy)-5-(*t*-butyl)benzene-1,3-diamine 5j**: white solid, 267.3 mg, 78% yield, mp 98 - 99 °C. <sup>1</sup>H NMR (600 MHz,  $\text{CDCl}_3$ ) (two rotamers 0.6:0.4)  $\delta$  (ppm): 8.09 - 8.00 (br, 0.6H), 7.85 - 7.82 (br, 0.4H), 7.33 (s, 0.6H), 7.28 (d,  $J$  = 9.0 Hz, 0.6H), 7.23- 7.09 (m, 6.8H), 6.80 (d,  $J$  = 8.4 Hz, 0.6H), 6.68 (d,  $J$  = 9.0 Hz, 0.4H), 6.57 (brs, 1H), 6.52 (s, 0.6H), 6.43 (s, 0.4H), 4.66 (s, 1.2H), 4.62 (s, 0.8H), 3.87 (s, 3H), 3.84 (s, 1.2H), 3.68 (s, 1.8H), 3.55 (s, 1.8H), 3.54 (s, 1.2H), 3.33 (s, 3H), 2.73 (s, 1.8H), 2.72 (s, 1.2H), 1.22 (s, 5.4H), 1.14 (s, 3.6H). <sup>13</sup>C NMR (100 MHz,  $\text{CDCl}_3$ )  $\delta$  (ppm): 172.3, 171.8, 171.7, 171.24, 171.15, 170.4, 170.2, 167.6, 164.82, 164.75, 148.3, 148.2, 147.8, 147.5, 142.8, 140.7, 140.5, 139.8, 139.0, 137.3, 137.0, 135.3, 135.1, 130.3, 129.7, 128.3, 128.1, 127.8, 127.5, 119.3, 118.9, 116.7, 113.9, 113.3, 112.1, 107.4, 106.8, 74.5, 74.4, 55.9, 55.3, 54.9, 54.6, 54.4, 38.0, 37.7, 34.6, 34.4, 31.3, 31.2. IR (KBr)  $\nu$ : 1601, 1575, 1509  $\text{cm}^{-1}$ . HRMS (TOF-ESI)  $m/z$   $[\text{M}+\text{H}]^+$  calcd. for  $\text{C}_{34}\text{H}_{39}\text{ClN}_9\text{O}_5$ : 688.2757; Found: 688.2761.

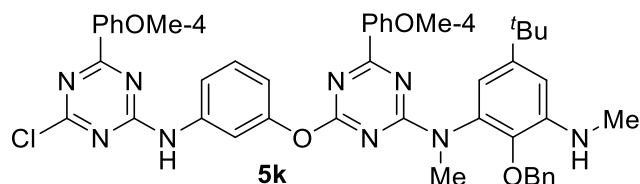

***N*<sup>1</sup>-(4-(3-((4-Chloro-6-(4-methoxyphenyl)-1,3,5-triazin-2-yl)amino)phenoxy)-6-(4-methoxyphenyl)-1,3,5-triazin-2-yl)-*N*<sup>1</sup>,*N*<sup>3</sup>-dimethyl-2-(benzyloxy)-5-(*t*-butyl)benzene-1,3-diamine **5k****: white solid, 271.4 mg, 67% yield, mp 108 - 110 °C. <sup>1</sup>H NMR (600 MHz, CDCl<sub>3</sub>) (two rotamers 0.55:0.45)  $\delta$  (ppm): 8.49 (d, *J* = 8.4 Hz, 1H), 8.36 - 8.30 (m, 2H), 8.16 (d, *J* = 8.4 Hz, 1H), 7.84 (br, 0.45H), 7.72 (br, 0.55H), 7.62 (brs 1H), 7.47 - 7.42 (m, 1.45H), 7.24 - 7.11 (m, 5.55H), 7.00 - 6.96 (m, 2H), 6.91 (d, *J* = 9.6 Hz, 2H), 6.81 (d, *J* = 8.4 Hz, 2H), 6.73 (brs, 0.55H), 6.68 (brs, 1H), 6.56 (s, 0.45H), 4.71 (s, 1H), 4.69 (s, 1H), 3.88 (s, 1.65H), 3.83 (s, 1.35H), 3.82 (s, 1.35H), 3.79 (s, 1.65H), 3.62 (s, 1.65H), 3.41 (s, 1.35H), 2.83 (s, 3H), 1.34 (s, 4.95H), 1.26 (s, 4.05H). <sup>13</sup>C NMR (150 MHz, CDCl<sub>3</sub>)  $\delta$  (ppm): 172.9, 172.6, 172.0, 171.4, 170.4, 167.2, 167.1, 164.3, 163.8, 163.1, 162.9, 153.0, 152.8, 148.2, 147.7, 138.3, 137.7, 137.2, 135.8, 135.7, 131.7, 131.1, 130.7, 129.3, 128.9, 128.7, 128.4, 128.3, 128.2, 127.9, 127.0, 126.8, 125.9, 117.9, 117.3, 114.2, 113.9, 113.7, 113.5, 75.0, 74.6, 55.4, 55.3, 37.9, 37.4, 34.70, 34.66, 31.5, 31.4. IR (KBr)  $\nu$ : 1601, 1545 cm<sup>-1</sup>. HRMS (TOF-ESI) *m/z* [M+H]<sup>+</sup> calcd. for C<sub>45</sub>H<sub>45</sub>ClN<sub>9</sub>O<sub>4</sub>: 810.3277; Found: 810.3273.

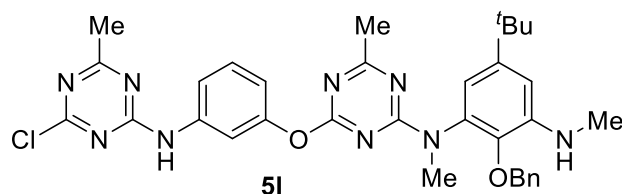

***N*<sup>1</sup>-(4-(3-((4-Chloro-6-methyl-1,3,5-triazin-2-yl)amino)phenoxy)-6-methyl-1,3,5-triazin-2-yl)-*N*<sup>1</sup>,*N*<sup>3</sup>-dimethyl-2-(benzyloxy)-5-(*t*-butyl)benzene-1,3-diamine **5l****: white solid, 244.0 mg, 78% yield, mp 109 - 111 °C. <sup>1</sup>H NMR (600 MHz, CDCl<sub>3</sub>) (two rotamers 0.65:0.35)  $\delta$  (ppm): 7.58 - 7.49 (m, 2H), 7.41 - 7.27 (m, 5.35H), 7.19 (t, *J* = 8.4 Hz, 1H), 7.15-7.13 (m, 1.65H), 7.04 (d, *J* = 7.8 Hz, 0.35H), 6.90 (d, *J* = 7.8 Hz, 0.65H), 6.74 (brs, 0.65H), 6.62 (s, 0.35H), 6.52 (s, 0.35H), 6.48 (s, 0.35H), 4.72 (s, 0.7H), 4.64 (s, 1.3H), 3.50 (s, 1.95H), 3.29 (s, 1.05H), 2.83 (s, 1.05H), 2.82 (s, 1.95H), 2.49 (s, 3H), 2.48 (s, 1.95H), 2.27 (s, 1.05H), 1.31 (s, 3.15H), 1.23 (s, 5.85H). <sup>13</sup>C NMR (150 MHz, CDCl<sub>3</sub>)  $\delta$  (ppm): 178.4, 177.9, 170.4, 169.4, 166.9, 166.7, 164.1, 152.5, 148.3, 147.9, 143.1, 139.6, 137.4, 137.1, 135.5, 129.2, 128.9, 128.4, 128.1, 128.0, 127.8, 125.9, 118.1, 117.5, 114.5, 114.1, 113.7, 113.2, 107.5, 107.0, 74.8, 74.4, 37.7, 34.6, 31.4, 31.3, 25.6, 25.4. IR (KBr)  $\nu$ : 1647, 1566, 1543 cm<sup>-1</sup>. HRMS (TOF-ESI) *m/z* [M+H]<sup>+</sup> calcd. for C<sub>33</sub>H<sub>37</sub>ClN<sub>9</sub>O<sub>2</sub>: 626.2753; Found: 626.2754.

## 7. Synthesis of racemic macrocycles **6**

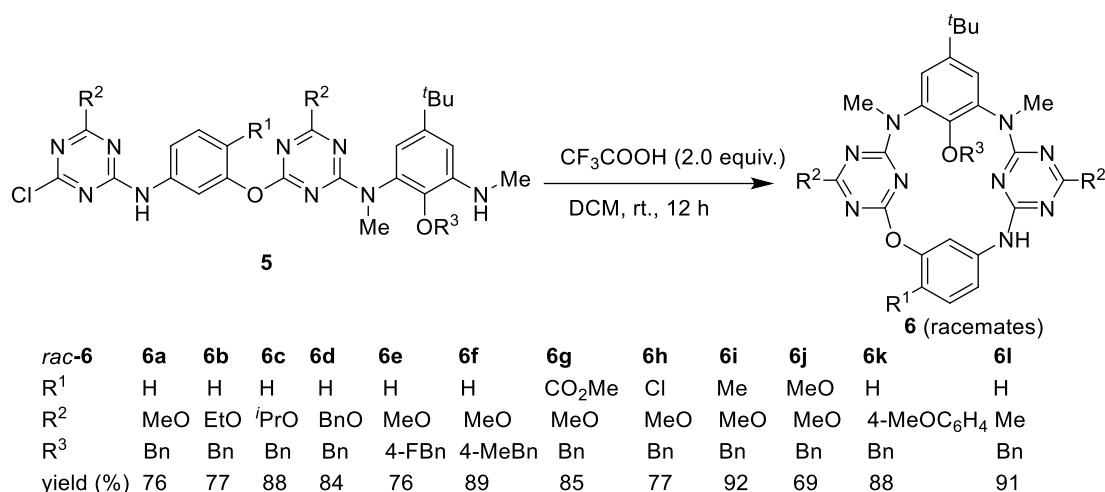

Scheme S6

The tetramers **5** (0.1 mmol),  $\text{CF}_3\text{CO}_2\text{H}$  (0.2 mmol) and DCM (40 mL) were mixed in a flask. The mixture was stirred at room temperature for 12 h until the starting material was consumed completely. The reaction solution was washed with saturated aqueous  $\text{NaHCO}_3$  (10×2 mL). The organic layer was dried over anhydrous  $\text{Na}_2\text{SO}_4$ . After removal of solvent, the residue was chromatographed on a silica gel column eluting with a mixture of petroleum ether and ethyl acetate (PE:EA from 5:1 to 2:1) to give the racemic macrocycles **6** in 69-92% yields.

## 8. Enantioselective synthesis of inherently chiral macrocycles **6**

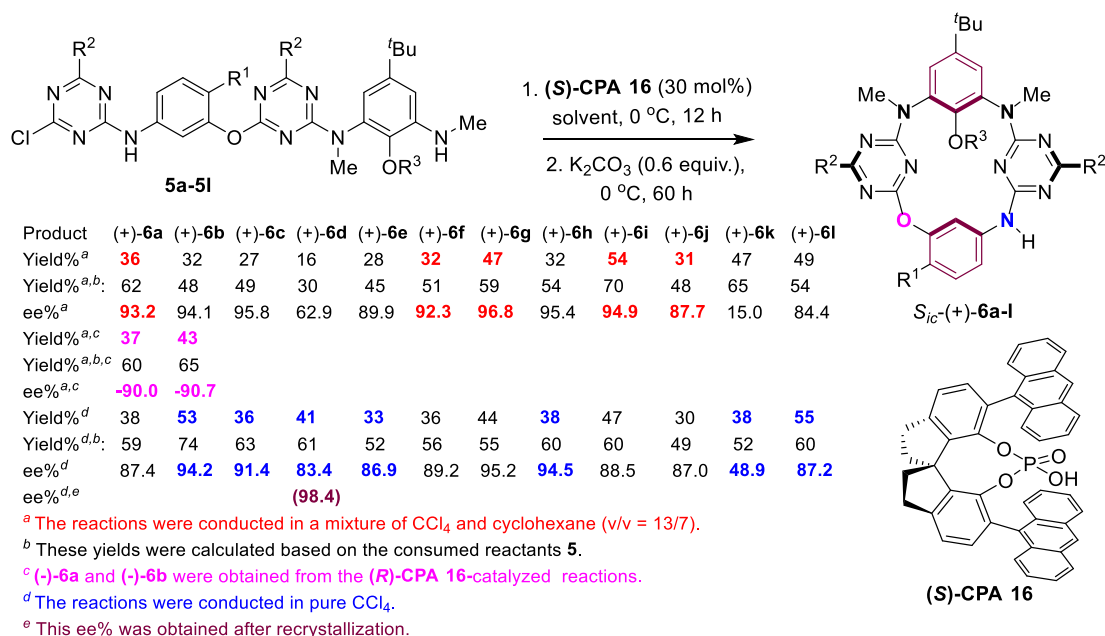

Scheme S7

### 7.1 General procedure:

In a test tube that was cooled at 0 °C, the tetramers **5** (0.05 mmol), chiral phosphoric acid (S)-CPA-

**16** (10.0 mg, 30 mol%), tetrachloromethane (13 mL) and cyclohexane (7 mL) (or sole tetrachloromethane, 20 mL) were added successively with stirring. The reaction mixture was stirred for 12 h at 0 °C. Then K<sub>2</sub>CO<sub>3</sub> (4.1 mg, 0.03 mmol) was added and the resulting mixture was stirred for another 60h at 0 °C. The solids in reaction mixture were suction filtrated quickly and washed with dichloromethane (5 mL) that was precooled at 0 °C. The combined filtrate was washed with cool saturated aqueous NaHCO<sub>3</sub> (10 mL). The organic layer was dried over anhydrous Na<sub>2</sub>SO<sub>4</sub>. After removal of Na<sub>2</sub>SO<sub>4</sub> and solvents, the residue was chromatographed on a silica gel column eluting with a mixture of petroleum ether and ethyl acetate (PE:EA from 3:1 to 2:1). The optically active macrocycles (+)-**6** were isolated in 16-54% yields with 15.0-96.8% ee from the reactions in the mixture of tetrachloromethane and cyclohexane (~2:1), or in 30-55% yields with 48.9-95.2% ee from the reactions in tetrachloromethane.

## 7.2 Stability of inherent chirality of compound 6a

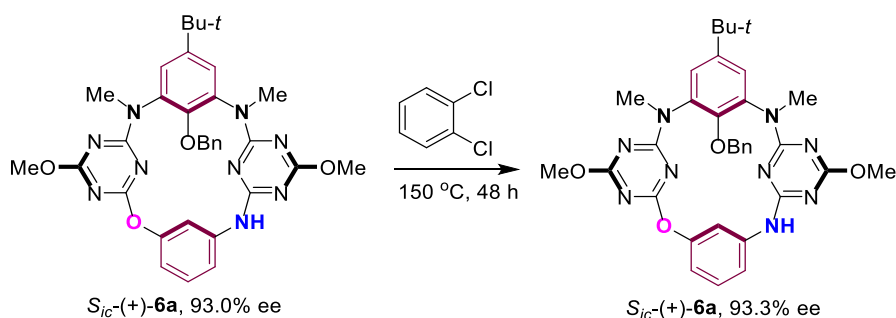

Scheme S8

Inherent chirality of heteracalix[4](het)arenes **6** were found very stable. For example, no racemization took place after heating  $S_{ic}-(+)-\mathbf{6a}$  at 150 °C for 48 h in *o*-dichlorobenzene (Scheme S8).

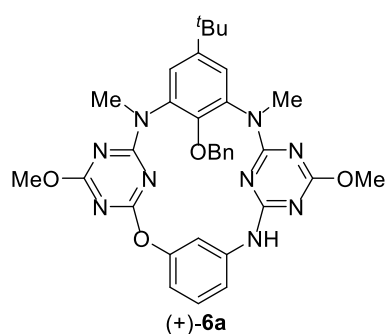

**$S_{ic}-(+)-7^2$ -(Benzyloxy)- $7^5$ -(*t*-butyl)-1<sup>6</sup>,5<sup>6</sup>-dimethoxy-6,8-dimethyl-2-oxa-4,6,8-triaza-1,5(2,4)-ditriazina-3,7(1,3)-dibenzenacyclooctaphane **6a**:** white solid, 11.2 mg, 36% yield and 93.2% ee from the reaction in the mixture of tetrachloromethane and cyclohexane (v:v = 13:7),  $[\alpha]_D^{25} = +38.0^\circ$  ( $c = 0.1$ , CH<sub>2</sub>Cl<sub>2</sub>), mp 99 - 101 °C. <sup>1</sup>H NMR (400 MHz, Acetone-*d*<sub>6</sub>)  $\delta$  (ppm): 8.12 (s, 1H), 7.26 - 7.22 (m, 3H), 7.19 (t,  $J = 7.6$  Hz, 1H), 7.08 (dd,  $J = 7.2, 2.0$  Hz, 2H), 7.02 (d,  $J = 2.4$  Hz, 1H), 7.00 (d,  $J = 2.4$  Hz, 1H), 6.90 - 6.89 (m, 1H), 6.86 (d,  $J = 8.0$  Hz, 1H), 6.80 (dd,  $J = 8.0, 2.4$  Hz, 1H),

4.73 (d,  $J = 12.0$  Hz, 1H), 4.62 (d,  $J = 12.0$  Hz, 1H), 3.94 (s, 3H), 3.87 (s, 3H), 3.38 (s, 3H), 3.36 (s, 3H), 1.17 (s, 9H).  $^{13}\text{C}$  NMR (150 MHz,  $\text{CDCl}_3$ )  $\delta$  (ppm): 173.1, 171.7, 171.6, 168.4, 167.9, 166.9, 152.6, 150.0, 148.0, 138.5, 137.9, 137.8, 136.9, 129.4, 128.4, 127.6, 126.9, 126.4, 125.3, 125.0, 123.7, 120.3, 74.0, 54.8, 54.1, 37.2, 36.4, 34.3, 31.3. IR (KBr)  $\nu$ : 3225 (w), 1667, 1582, 1543  $\text{cm}^{-1}$ . HRMS (APCI)  $m/z$   $[\text{M}+\text{H}]^+$  calcd. for  $\text{C}_{33}\text{H}_{36}\text{N}_9\text{O}_4$ : 622.2885; Found: 622.2872.

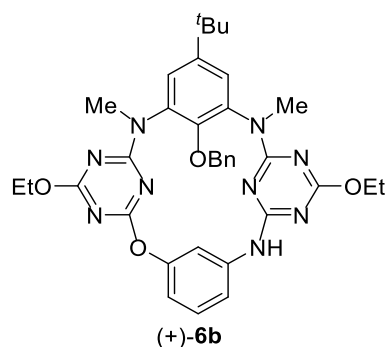

***Sic*-(+)-7<sup>2</sup>-(Benzyloxy)-7<sup>5</sup>-(*t*-butyl)-1<sup>6</sup>,5<sup>6</sup>-diethoxy-6,8-dimethyl-2-oxa-4,6,8-triaza-1,5(2,4)-ditriazina-3,7(1,3)-dibenzenacyclooctaphane 6b**: white solid, 17.2 mg, 53% yield and 94.2% ee from the reaction in tetrachloromethane,  $[\alpha]_{\text{D}}^{25} = +94.2^\circ$  ( $c = 0.2$ ,  $\text{CH}_2\text{Cl}_2$ ), mp 98 - 99  $^\circ\text{C}$ .  $^1\text{H}$  NMR (400 MHz, Acetone- $d_6$ )  $\delta$  (ppm): 8.46 (s, 1H), 7.25 - 7.22 (m, 3H), 7.19 (t,  $J = 8.0$  Hz, 1H), 7.09 (dd,  $J = 7.6, 1.6$  Hz, 2H), 7.02 (d,  $J = 2.4$  Hz, 1H), 7.00 (d,  $J = 2.4$  Hz, 1H), 6.90 - 6.86 (m, 2H), 6.80 (dd,  $J = 8.0, 2.0$  Hz, 1H), 4.73 (d,  $J = 11.6$  Hz, 1H), 4.62 (d,  $J = 11.6$  Hz, 1H), 4.41 (q,  $J = 7.2$  Hz, 2H), 4.32 (qd,  $J = 7.2, 1.6$  Hz, 2H), 3.38 (s, 3H), 3.35 (s, 3H), 1.38 (t,  $J = 7.2$  Hz, 3H), 1.29 (t,  $J = 7.2$  Hz, 3H), 1.17 (s, 9H).  $^{13}\text{C}$  NMR (100 MHz,  $\text{CDCl}_3$ )  $\delta$  (ppm): 172.5, 171.6, 171.0, 168.4, 167.8, 166.8, 152.5, 149.9, 147.9, 138.6, 137.9, 137.8, 137.0, 129.3, 128.4, 127.7, 127.0, 126.4, 125.3, 125.0, 123.7, 120.2, 74.0, 63.8, 62.8, 37.3, 36.4, 34.3, 31.3, 14.6. IR (KBr)  $\nu$ : 3210 (w), 1667, 1574, 1551  $\text{cm}^{-1}$ . HRMS (TOF-ESI)  $m/z$   $[\text{M}+\text{H}]^+$  calcd. for  $\text{C}_{35}\text{H}_{40}\text{N}_9\text{O}_4$ : 650.3197; Found: 650.3203.

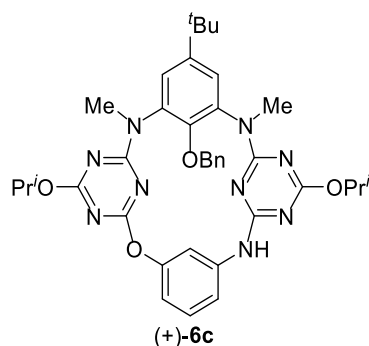

***Sic*-(+)-7<sup>2</sup>-(Benzyloxy)-7<sup>5</sup>-(*t*-butyl)-1<sup>6</sup>,5<sup>6</sup>-diisopropoxy-6,8-dimethyl-2-oxa-4,6,8-triaza-1,5(2,4)-ditriazina-3,7(1,3)-dibenzenacyclooctaphane 6c**: white solid, 12.2 mg, 36% yield, 91.4% ee from the reaction in tetrachloromethane,  $[\alpha]_{\text{D}}^{25} = +61.5^\circ$  ( $c = 0.2$ ,  $\text{CH}_2\text{Cl}_2$ ), mp 91 - 92  $^\circ\text{C}$ .  $^1\text{H}$  NMR (400 MHz, Acetone- $d_6$ )  $\delta$  (ppm): 8.11 (s, 1H), 7.24 - 7.23 (m, 3H), 7.18 (t,  $J = 8.0$  Hz, 1H), 7.08 (dd,  $J = 7.6, 2.0$  Hz, 2H), 7.02 (d,  $J = 2.4$  Hz, 1H), 7.00 (d,  $J = 2.4$  Hz, 1H), 6.90 - 6.88 (m, 1H), 6.85 (d,  $J = 8.0$  Hz, 1H), 6.79 (dd,  $J = 8.0, 2.0$  Hz, 1H), 5.34 - 5.24 (m, 2H), 4.72 (d,  $J = 11.6$  Hz, 1H), 4.62 (d,  $J = 11.6$  Hz, 1H), 3.37 (s, 3H), 3.35 (s, 3H), 1.37 (d,  $J = 2.0$  Hz, 3H), 1.36 (d,  $J =$

2.0 Hz, 3H), 1.32 (d,  $J = 6.4$  Hz, 6H), 1.17 (s, 9H).  $^{13}\text{C}$  NMR (150 MHz,  $\text{CDCl}_3$ )  $\delta$  (ppm): 172.2, 171.7, 170.5, 168.5, 167.9, 166.8, 152.6, 150.0, 147.9, 138.7, 138.0, 137.8, 137.1, 129.3, 128.4, 127.7, 127.1, 126.4, 125.3, 125.1, 123.8, 120.2, 74.0, 70.9, 69.8, 37.3, 36.4, 34.3, 31.3, 22.11, 22.08. IR (KBr)  $\nu$ : 3217 (w), 1574, 1535  $\text{cm}^{-1}$ . HRMS (TOF-ESI)  $m/z$   $[\text{M}+\text{H}]^+$  calcd. for  $\text{C}_{37}\text{H}_{44}\text{N}_9\text{O}_4$ : 678.3510; Found: 678.3512.

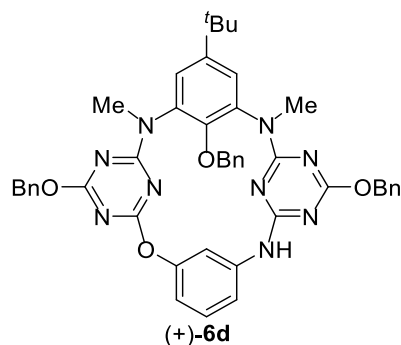

***Sic*-(+)-1<sup>6</sup>,5<sup>6</sup>,7<sup>2</sup>-Tris(benzyloxy)-7<sup>5</sup>-(*t*-butyl)-6,8-dimethyl-2-oxa-4,6,8-triaza-1,5(2,4)-ditriazina-3,7(1,3)-dibenzenacyclooctaphane 6d**: white solid, 15.9 mg, 41% yield and 83.4% ee from the reaction in tetrachloromethane (98.4% ee after recrystallization),  $[\alpha]_{\text{D}}^{25} = +32.0^\circ$  ( $c = 0.2$ ,  $\text{CH}_2\text{Cl}_2$ ) for 83 % ee,  $[\alpha]_{\text{D}}^{25} = +50.5^\circ$  ( $c = 0.2$ ,  $\text{CH}_2\text{Cl}_2$ ) for 98 % ee, mp 101 - 103  $^\circ\text{C}$ .  $^1\text{H}$  NMR (400 MHz, Acetone- $d_6$ )  $\delta$  (ppm): 8.24 (s, 1H), 7.54 (d,  $J = 6.8$  Hz, 2H), 7.50 (d,  $J = 6.8$  Hz, 2H), 7.45 - 7.34 (m, 6H), 7.21 - 7.17 (m, 4H), 7.07 - 7.05 (m, 2H), 7.02 (d,  $J = 2.8$  Hz, 1H), 7.00 (d,  $J = 2.8$  Hz, 1H), 6.91 - 6.90 (m, 1H), 6.86 (d,  $J = 8.0$  Hz, 1H), 6.81 (dd,  $J = 8.0, 2.4$  Hz, 1H), 5.45 (s, 2H), 5.40 (s, 2H), 4.70 (d,  $J = 11.6$  Hz, 1H), 4.60 (d,  $J = 11.6$  Hz, 1H), 3.39 (s, 3H), 3.37 (s, 3H), 1.16 (s, 9H).  $^{13}\text{C}$  NMR (150 MHz,  $\text{CDCl}_3$ )  $\delta$  (ppm): 172.5, 171.7, 170.9, 168.5, 167.9, 166.9, 152.6, 149.9, 148.0, 138.6, 137.9, 137.7, 137.0, 136.9, 136.3, 129.4, 128.6, 128.52, 128.49, 128.4, 128.32, 128.29, 128.1, 127.7, 127.0, 126.4, 125.3, 125.0, 123.7, 120.2, 74.1, 69.3, 68.4, 37.3, 36.5, 34.4, 31.3. IR (KBr)  $\nu$ : 3217, 1667, 1582, 1543  $\text{cm}^{-1}$ . HRMS (TOF-ESI)  $m/z$   $[\text{M}+\text{H}]^+$  calcd. for  $\text{C}_{45}\text{H}_{44}\text{N}_9\text{O}_4$ : 774.3551; Found: 774.3543.

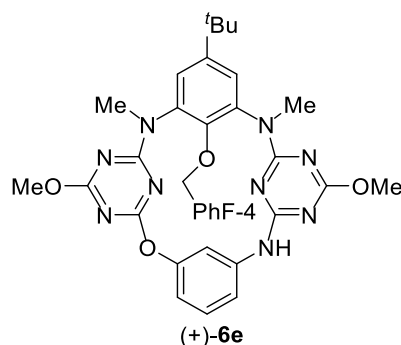

***Sic*-(+)-7<sup>5</sup>-(*t*-Butyl)-7<sup>2</sup>-((4-fluorobenzyl)oxy)-1<sup>6</sup>,5<sup>6</sup>-dimethoxy-6,8-dimethyl-2-oxa-4,6,8-triaza-1,5(2,4)-ditriazina-3,7(1,3)-dibenzenacyclooctaphane 6e**: white solid, 10.5 mg, 33% yield and 86.9% ee from the reaction in tetrachloromethane,  $[\alpha]_{\text{D}}^{25} = +37.5^\circ$  ( $c = 0.2$ ,  $\text{CH}_2\text{Cl}_2$ ), mp 96 - 98 $^\circ\text{C}$ .  $^1\text{H}$  NMR (400 MHz, Acetone- $d_6$ )  $\delta$  (ppm): 8.21 (s, 1H), 7.19 (t,  $J = 8.0$  Hz, 1H), 7.15 - 7.11 (m, 2H), 7.02 - 6.97 (m, 4H), 6.91 - 6.90 (m, 1H), 6.86 (d,  $J = 8.0$  Hz, 1H), 6.80 (dd,  $J = 8.0, 1.6$  Hz, 1H),

4.72 (d,  $J = 11.6$  Hz, 1H), 4.62 (d,  $J = 11.6$  Hz, 1H), 3.95 (s, 3H), 3.87 (s, 3H), 3.38 (s, 3H), 3.35 (s, 3H), 1.16 (s, 9H).  $^{13}\text{C}$  NMR (100 MHz,  $\text{CDCl}_3$ )  $\delta$  (ppm): 173.1, 171.7, 171.4, 168.3, 167.8, 166.7, 162.3 (d,  $J = 245.0$  Hz), 152.5, 149.8, 148.2, 138.4, 137.7, 136.8, 133.7 (d,  $J = 3.0$  Hz), 129.5, 128.6 (d,  $J = 8.0$  Hz), 126.4, 125.3, 125.0, 123.6, 120.4, 115.3 (d,  $J = 21.0$  Hz), 73.3, 54.9, 54.2, 37.2, 36.4, 34.4, 31.3. IR (KBr)  $\nu$ : 3223 (w), 1612, 1579, 1534  $\text{cm}^{-1}$ . HRMS (TOF-ESI)  $m/z$   $[\text{M}+\text{H}]^+$  calcd. for  $\text{C}_{33}\text{H}_{35}\text{FN}_9\text{O}_4$ : 640.2790; Found: 640.2800.

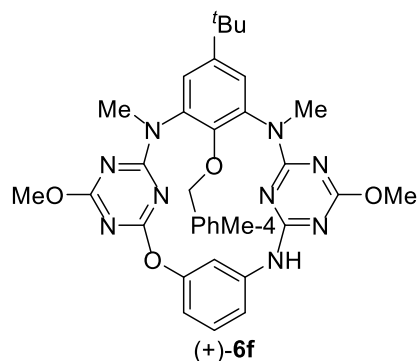

***Sic*-(+)-7<sup>5</sup>-(*t*-Butyl)-7<sup>2</sup>-((4-methylbenzyl)oxy)-1<sup>6</sup>,5<sup>6</sup>-dimethoxy-6,8-dimethyl-2-oxa-4,6,8-triaza-1,5(2,4)-ditriazina-3,7(1,3)-dibenzenacyclooctaphane 6f**: white solid, 10.2 mg, 32% yield and 92.3% ee from the reaction in tetrachloromethane and cyclohexane (v:v = 13:7),  $[\alpha]_{\text{D}}^{25} = +65.5^\circ$  ( $c = 0.2$ ,  $\text{CH}_2\text{Cl}_2$ ), mp 89 - 91  $^\circ\text{C}$ .  $^1\text{H}$  NMR (400 MHz, Acetone- $d_6$ )  $\delta$  (ppm): 8.12 (s, 1H), 7.19 (t,  $J = 8.0$  Hz, 1H), 7.05 (d,  $J = 8.0$  Hz, 2H), 7.01 (d,  $J = 2.8$  Hz, 1H), 6.99 (d,  $J = 2.4$  Hz, 1H), 6.96 (d,  $J = 8.0$  Hz, 2H), 6.88 - 6.85 (m, 2H), 6.80 (dd,  $J = 8.0, 2.4$  Hz, 1H), 4.67 (d,  $J = 11.6$  Hz, 1H), 4.56 (d,  $J = 11.6$  Hz, 1H), 3.95 (s, 3H), 3.88 (s, 3H), 3.37 (s, 3H), 3.36 (s, 3H), 2.28 (s, 3H), 1.16 (s, 9H).  $^{13}\text{C}$  NMR (150 MHz,  $\text{CDCl}_3$ )  $\delta$  (ppm): 173.0, 171.6, 171.3, 168.4, 167.8, 166.6, 152.5, 150.0, 147.9, 138.4, 137.8, 137.4, 136.9, 134.8, 129.4, 129.1, 127.1, 126.3, 125.3, 125.0, 123.7, 120.3, 74.0, 54.9, 54.2, 37.2, 36.4, 34.3, 31.3, 21.2. IR (KBr)  $\nu$ : 3231 (w), 1613, 1579, 1534  $\text{cm}^{-1}$ . HRMS (TOF-ESI)  $m/z$   $[\text{M}+\text{H}]^+$  calcd. for  $\text{C}_{34}\text{H}_{38}\text{N}_9\text{O}_4$ : 636.3041; Found: 636.3023.

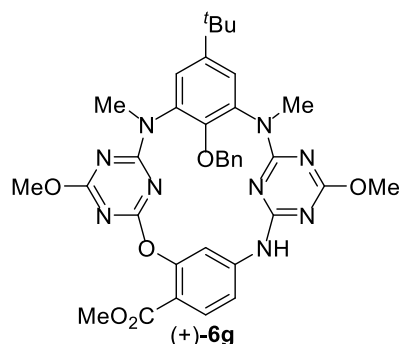

***Sic*-(+)-Methyl 7<sup>2</sup>-(benzyloxy)-7<sup>5</sup>-(*t*-butyl)-1<sup>6</sup>,5<sup>6</sup>-dimethoxy-6,8-dimethyl-2-oxa-4,6,8-triaza-1,5(2,4)-ditriazina-3,7(1,3)-dibenzenacyclooctaphane-3<sup>6</sup>-carboxylate 6g**: white solid, 16.0 mg, 47% yield and 96.8% ee from the reaction in tetrachloromethane and cyclohexane (v:v = 13:7),  $[\alpha]_{\text{D}}^{25} = +74.5^\circ$  ( $c = 0.2$ ,  $\text{CH}_2\text{Cl}_2$ ), mp 77 - 78  $^\circ\text{C}$ .  $^1\text{H}$  NMR (600 MHz,  $\text{CDCl}_3$ )  $\delta$  (ppm): 7.81 (s, 1H), 7.77 (d,  $J = 7.8$  Hz, 1H), 7.24 - 7.19 (m, 3H), 7.02 (d,  $J = 1.2$  Hz, 1H), 7.01 (d,  $J = 1.2$  Hz, 1H), 6.90

(dd,  $J = 8.4, 1.8$  Hz, 1H), 6.82-6.81 (m, 3H), 4.58 (d,  $J = 11.4$  Hz, 1H), 4.47 (d,  $J = 12.0$  Hz, 1H), 4.02 (s, 3H), 3.86 (s, 3H), 3.76 (s, 3H), 3.37 (s, 3H), 3.34 (s, 3H), 1.10 (s, 9H).  $^{13}\text{C}$  NMR (150 MHz,  $\text{CDCl}_3$ )  $\delta$  (ppm): 173.2, 171.8, 171.5, 168.3, 167.8, 166.8, 164.6, 152.5, 150.0, 148.0, 143.0, 137.8, 137.7, 137.1, 131.9, 128.4, 127.6, 126.8, 126.2, 125.5, 125.3, 125.1, 121.7, 74.0, 54.9, 54.1, 52.2, 37.1, 36.4, 34.3, 31.2. IR (KBr)  $\nu$ : 3217 (w), 1728, 1589, 1543  $\text{cm}^{-1}$ . HRMS (TOF-ESI)  $m/z$   $[\text{M}+\text{H}]^+$  calcd. for  $\text{C}_{35}\text{H}_{38}\text{N}_9\text{O}_6$ : 680.2939; Found: 680.2933.

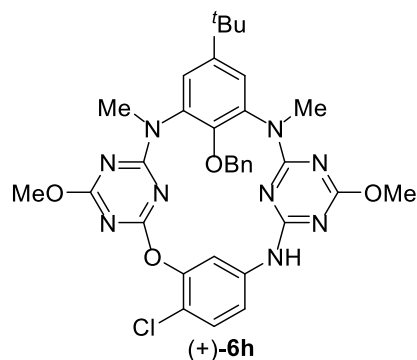

***Sic*-(+)-7<sup>2</sup>-(Benzyloxy)-7<sup>5</sup>-(*t*-butyl)-3<sup>6</sup>-chloro-1<sup>6</sup>,5<sup>6</sup>-dimethoxy-6,8-dimethyl-2-oxa-4,6,8-triaza-1,5(2,4)-ditriazina-3,7(1,3)-dibenzenacyclooctaphane 6h**: white solid, 12.3 mg, 38% yield and 94.5% ee from the reaction in tetrachloromethane,  $[\alpha]_{\text{D}}^{25} = +42^\circ$  ( $c = 0.2$ ,  $\text{CH}_2\text{Cl}_2$ ), mp 109 - 111  $^\circ\text{C}$ .  $^1\text{H}$  NMR (400 MHz, Acetone- $d_6$ )  $\delta$  (ppm): 8.14 (s, 1H), 7.27 (d,  $J = 8.4$  Hz, 1H), 7.23- 7.20 (m, 3H), 7.06 (dd,  $J = 7.6, 2.4$  Hz, 2H), 7.03 (d,  $J = 2.4$  Hz, 1H), 7.01 (d,  $J = 2.4$  Hz, 1H), 7.00 (d,  $J = 2.8$  Hz, 1H), 6.89 (dd,  $J = 8.4, 2.0$  Hz, 1H), 4.67 (d,  $J = 11.6$  Hz, 1H), 4.54 (d,  $J = 12.0$  Hz, 1H), 3.96 (s, 3H), 3.87 (s, 3H), 3.38 (s, 3H), 3.34 (s, 3H), 1.21 (s, 9H).  $^{13}\text{C}$  NMR (150 MHz,  $\text{CDCl}_3$ )  $\delta$  (ppm): 173.3, 171.6, 171.1, 168.3, 167.8, 167.2, 150.0, 148.6, 148.1, 137.82, 137.80, 137.3, 136.9, 130.0, 128.4, 127.7, 126.9, 126.8, 126.4, 126.1, 125.5, 125.4, 74.0, 55.0, 54.2, 37.1, 36.4, 34.4, 31.3. IR (KBr)  $\nu$ : 3221 (w), 1612, 1582, 1537  $\text{cm}^{-1}$ . HRMS (TOF-ESI)  $m/z$   $[\text{M}+\text{H}]^+$  calcd. for  $\text{C}_{33}\text{H}_{35}\text{ClN}_9\text{O}_4$ : 656.2495; Found: 656.2499.

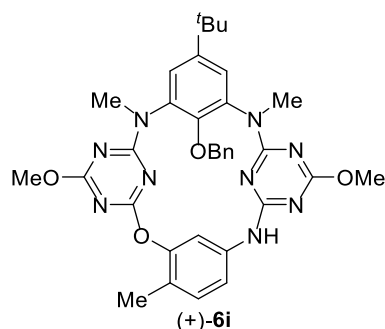

***Sic*-(+)-7<sup>2</sup>-(Benzyloxy)-7<sup>5</sup>-(*t*-butyl)-1<sup>6</sup>,5<sup>6</sup>-dimethoxy-3<sup>6</sup>,6,8-trimethyl-2-oxa-4,6,8-triaza-1,5(2,4)-ditriazina-3,7(1,3)-dibenzenacyclooctaphane 6i**: white solid, 17.2 mg, 54% yield and 94.9% ee from the reaction in tetrachloromethane and cyclohexane ( $v:v = 13:7$ ),  $[\alpha]_{\text{D}}^{25} = +47.0^\circ$  ( $c = 0.2$ ,  $\text{CH}_2\text{Cl}_2$ ), mp 90 - 91  $^\circ\text{C}$ .  $^1\text{H}$  NMR (400 MHz, Acetone- $d_6$ )  $\delta$  (ppm): 8.01 (s, 1H), 7.25 - 7.20 (m, 3H), 7.07-7.02 (m, 3H), 7.02 (d,  $J = 2.8$  Hz, 1H), 6.97 (d,  $J = 2.4$  Hz, 1H), 6.76 - 6.74 (m, 2H),

4.64 (d,  $J = 12.0$  Hz, 1H), 4.53 (d,  $J = 12.0$  Hz, 1H), 3.95 (s, 3H), 3.86 (s, 3H), 3.36 (s, 3H), 3.33 (s, 3H), 2.02 (s, 3H), 1.20 (s, 9H).  $^{13}\text{C}$  NMR (100 MHz,  $\text{CDCl}_3$ )  $\delta$  (ppm): 173.1, 171.5, 171.3, 168.4, 167.7, 167.2, 150.8, 150.0, 147.8, 138.0, 137.8, 136.9, 136.1, 130.8, 129.4, 128.3, 127.5, 126.8, 126.3, 125.8, 125.3, 123.4, 74.0, 54.9, 54.1, 37.0, 36.3, 34.3, 31.3, 15.7. IR (KBr)  $\nu$ : 3225 (w), 1582, 1543  $\text{cm}^{-1}$ . HRMS (TOF-ESI)  $m/z$   $[\text{M}+\text{H}]^+$  calcd. for  $\text{C}_{34}\text{H}_{38}\text{N}_9\text{O}_4$ : 636.3041; Found: 636.3045.

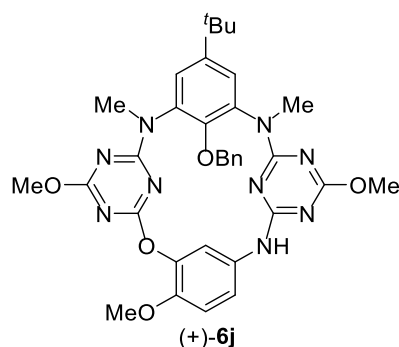

***Sic*-(+)-7<sup>2</sup>-(Benzyloxy)-7<sup>5</sup>-(*t*-butyl)-1<sup>6</sup>,3<sup>6</sup>,5<sup>6</sup>-trimethoxy-6,8-dimethyl-2-oxa-4,6,8-triaza-1,5(2,4)-ditriazina-3,7(1,3)-dibenzenacyclooctaphane **6j****: white solid, 10.2 mg, 31% yield and 87.7% ee from the reaction in tetrachloromethane and cyclohexane (v:v = 13:7),  $[\alpha]_{\text{D}}^{25} = +64.0^\circ$  ( $c = 0.2$ ,  $\text{CH}_2\text{Cl}_2$ ), mp 115 - 116  $^\circ\text{C}$ .  $^1\text{H}$  NMR (400 MHz, Acetone- $d_6$ )  $\delta$  (ppm): 7.92 (s, 1H), 7.23 - 7.20 (m, 3H), 7.05 (dd,  $J = 7.6, 2.0$  Hz, 2H), 7.01 (d,  $J = 2.4$  Hz, 1H), 6.97 (d,  $J = 2.4$  Hz, 1H), 6.85 (d,  $J = 8.4$  Hz, 1H), 6.82 - 6.77 (m, 2H), 4.71 (d,  $J = 12.0$  Hz, 1H), 4.54 (d,  $J = 12.0$  Hz, 1H), 3.93 (s, 3H), 3.87 (s, 3H), 3.70 (s, 3H), 3.35 (s, 3H), 3.32 (s, 3H), 1.21 (s, 9H).  $^{13}\text{C}$  NMR (150 MHz,  $\text{CDCl}_3$ )  $\delta$  (ppm): 173.2, 171.63, 171.58, 168.4, 167.8, 167.5, 150.7, 150.1, 147.7, 141.3, 137.9, 137.2, 130.3, 128.4, 127.6, 126.8, 126.6, 126.4, 125.1, 124.8, 112.1, 73.9, 56.1, 54.9, 54.1, 37.2, 36.3, 34.4, 31.4. IR (KBr)  $\nu$ : 3223 (w), 1612, 1580, 1534  $\text{cm}^{-1}$ . HRMS (TOF-ESI)  $m/z$   $[\text{M}+\text{H}]^+$  calcd. for  $\text{C}_{34}\text{H}_{38}\text{N}_9\text{O}_5$ : 652.2990; Found: 652.2996.

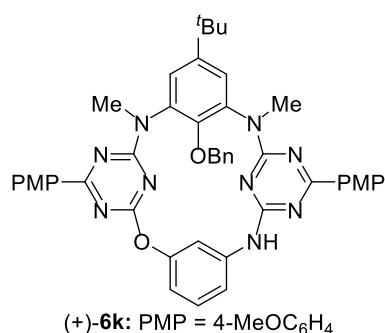

***Sic*-(+)-7<sup>2</sup>-(Benzyloxy)-7<sup>5</sup>-(*t*-butyl)-1<sup>6</sup>,5<sup>6</sup>-bis(4-methoxyphenyl)-6,8-dimethyl-2-oxa-4,6,8-triaza-1,5(2,4)-ditriazina-3,7(1,3)-dibenzenacyclooctaphane **6k****: white solid, 14.8 mg, 38% yield and 48.9% ee from the reaction in tetrachloromethane,  $[\alpha]_{\text{D}}^{25} = +40.5^\circ$  ( $c = 0.2$ ,  $\text{CH}_2\text{Cl}_2$ ), mp 126 - 128  $^\circ\text{C}$ .  $^1\text{H}$  NMR (400 MHz, Acetone- $d_6$ )  $\delta$  (ppm): 8.49 (d,  $J = 8.8$  Hz, 2H), 8.45 (d,  $J = 8.8$  Hz, 2H), 8.23 (s, 1H), 7.24 (t,  $J = 8.0$  Hz, 1H), 7.11-7.07 (m, 4H), 7.05 - 6.98 (m, 8H), 6.92 (d,  $J = 8.0$  Hz, 1H), 6.87 (dd,  $J = 8.0, 24$  Hz, 1H), 4.79 (d,  $J = 11.6$  Hz, 1H), 4.69 (d,  $J = 11.6$  Hz, 1H), 3.92 (s,

3H), 3.90 (s, 3H), 3.56 (s, 3H), 3.53 (s, 3H), 1.20 (s, 9H).  $^{13}\text{C}$  NMR (100 MHz,  $\text{CDCl}_3$ )  $\delta$  (ppm): 173.2, 171.1, 171.0, 167.7, 166.9, 166.1, 163.1, 162.6, 152.6, 150.2, 148.0, 138.6, 138.0, 137.6, 137.0, 130.8, 130.2, 129.7, 129.5, 128.8, 128.3, 127.6, 127.0, 126.4, 125.4, 124.8, 123.8, 120.4, 113.71, 113.66, 74.1, 55.53, 55.50, 37.2, 36.4, 34.4, 31.3. IR (KBr)  $\nu$ : 3228 (w), 1609, 1590, 1557, 1518  $\text{cm}^{-1}$ . HRMS (TOF-ESI)  $m/z$   $[\text{M}+\text{H}]^+$  calcd. for  $\text{C}_{45}\text{H}_{44}\text{N}_9\text{O}_4$ : 774.3510; Found: 774.3514.

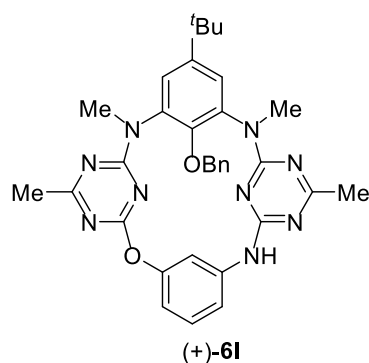

***Sic*-(+)-7<sup>2</sup>-(Benzyloxy)-7<sup>5</sup>-(*t*-butyl)-1<sup>6</sup>,5<sup>6</sup>,6,8-tetramethyl-2-oxa-4,6,8-triaza-1,5(2,4)-ditriazina-3,7(1,3)-dibenzenacyclooctaphane 6I**: white solid, 16.2 mg, 55% yield and 87.2% ee from the reaction in tetrachloromethane,  $[\alpha]_{\text{D}}^{25} = +48.0^\circ$  ( $c = 0.2$ ,  $\text{CH}_2\text{Cl}_2$ ), mp 97 - 99  $^\circ\text{C}$ .  $^1\text{H}$  NMR (400 MHz, Acetone- $d_6$ )  $\delta$  (ppm): 8.12 (s, 1H), 7.24 - 7.22 (m, 3H), 7.19 (d,  $J = 8.0$  Hz, 1H), 7.04 - 7.02 (m, 3H), 6.98 (d,  $J = 2.4$  Hz, 1H), 6.89 - 6.87 (m, 1H), 6.85 (d,  $J = 8.0$  Hz, 1H), 6.79 (dd,  $J = 8.0$ , 1.2 Hz, 1H), 4.68 (d,  $J = 12.0$  Hz, 1H), 4.57 (d,  $J = 12.0$  Hz, 1H), 3.40 (s, 3H), 3.37 (s, 3H), 2.35 (s, 3H), 2.23 (s, 3H), 1.16 (s, 9H).  $^{13}\text{C}$  NMR (150 MHz,  $\text{CDCl}_3$ )  $\delta$  (ppm): 178.7, 175.6, 170.6, 167.5, 166.5, 165.4, 152.6, 150.0, 148.2, 138.6, 137.9, 137.8, 136.9, 129.5, 128.4, 127.6, 126.9, 126.3, 125.3, 125.1, 123.7, 120.4, 74.0, 37.2, 36.4, 34.4, 31.3, 25.8, 25.6. IR (KBr)  $\nu$ : 3215, 1574, 1533  $\text{cm}^{-1}$ . HRMS (TOF-ESI)  $m/z$   $[\text{M}+\text{H}]^+$  calcd. for  $\text{C}_{33}\text{H}_{36}\text{N}_9\text{O}_2$ : 590.2986; Found: 590.2990.

## 9. Functionalization of macrocyclic compounds *Sic*-(+)-6a and *Sic*-(+)-6g

### 9.1 Synthesis of *N*-alkyl substituted macrocycles 8

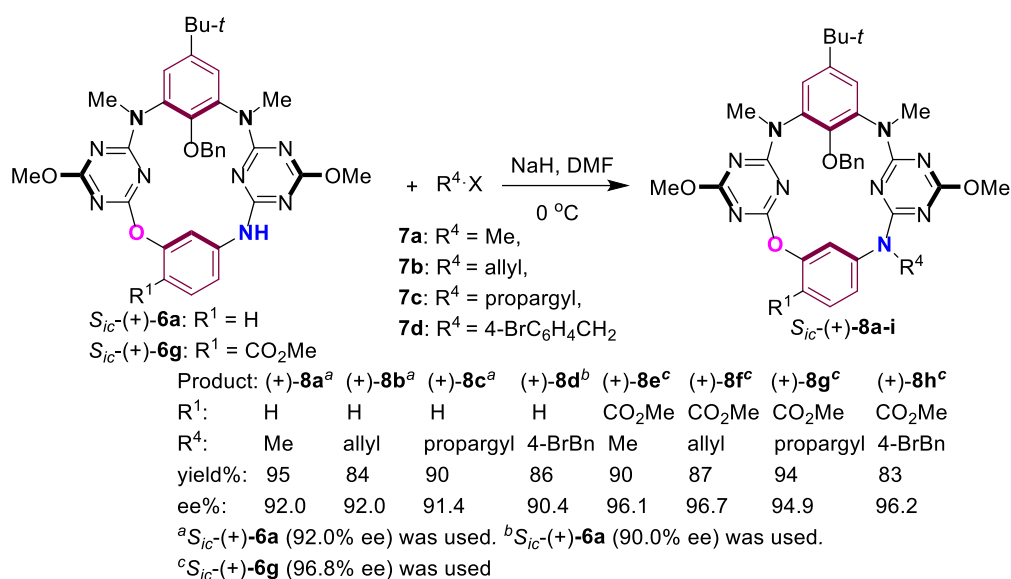

Scheme S9

Under the protection of nitrogen atmosphere, a solution of macrocycles **6** ((+)-**6a**: 90.0% ee or 92.0% ee; (+)-**6g**: 96.8% ee) (0.05 mmol) in dry DMF (2 mL) was added to the NaH (0.1 mmol, 4 mg of 60% dispersion in mineral oil. The mineral oil was removed by washing with *n*-hexane) in a test tube that was cooled in an ice bath. The resulting mixture was stirred for 0.5 h at 0 °C, and then the halohydrocarbons **7** (0.15 mmol) (**7a**: iodomethane; **7b**: 3-bromoprop-1-ene; **7c**: 3-bromoprop-1-yne; **7d**: *p*-bromobenzyl bromide) were added to it. The reaction mixture was stirred for another 0.5 h at 0 °C. The reaction was quenched with ice water and the mixture was extracted with DCM (30 × 2 mL). The combined organic layers were washed with saturated aqueous NaCl (30 × 3 mL) and dried over anhydrous Na<sub>2</sub>SO<sub>4</sub>. After filtration and concentration under vacuo, the residue was chromatographed on a silica gel column eluting with a mixture of petroleum ether and ethyl acetate (PE:EA = 4:1) to give the chiral macrocycles **8** in 83-95% yields with 90.4-96.7% ee.

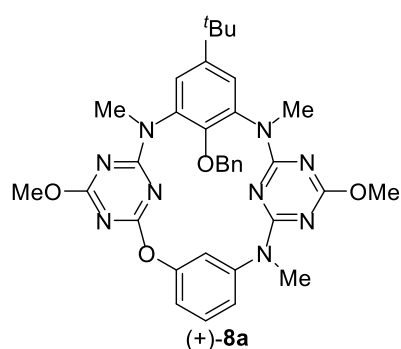

***S*<sub>ic</sub>**-(+)-7<sup>2</sup>-(Benzyloxy)-7<sup>5</sup>-(*t*-butyl)-1<sup>6</sup>,5<sup>6</sup>-dimethoxy-4,6,8-trimethyl-2-oxa-4,6,8-triaza-1,5(2,4)-ditriazina-3,7(1,3)-dibenzenacyclooctaphane **8a**: white solid, 30.1 mg, 95% yield, 92.0% ee,  $[\alpha]_{\text{D}}^{25} = +73.0^\circ$  ( $c = 0.2$ , CH<sub>2</sub>Cl<sub>2</sub>), mp 80 – 81 °C. <sup>1</sup>H NMR (600 MHz, Acetone-*d*<sub>6</sub>)  $\delta$  (ppm): 7.24 - 7.19 (m, 4H), 7.03 (dd,  $J = 7.2, 1.8$  Hz, 2H), 6.97 (d,  $J = 2.4$  Hz, 1H), 6.95 (d,  $J = 2.4$  Hz, 1H), 6.91 - 6.89 (m, 1H), 6.82 - 6.80 (m, 2H), 4.62 (d,  $J = 12.0$  Hz, 1H), 4.49 (d,  $J = 12.0$  Hz, 1H), 3.93 (s, 3H), 3.92 (s, 3H), 3.34 (s, 3H), 3.324 (s, 3H), 3.317 (s, 3H), 1.20 (s, 9H). <sup>13</sup>C NMR (100

MHz, CDCl<sub>3</sub>)  $\delta$  (ppm): 173.0, 171.9, 171.2, 168.2, 167.1, 166.5, 153.0, 149.8, 147.7, 145.9, 137.8, 136.9, 130.0, 128.3, 127.5, 126.7, 126.4, 124.9, 124.7, 122.3, 120.6, 73.8, 54.9, 54.1, 37.6, 36.9, 36.4, 34.3, 31.4. IR (KBr)  $\nu$ : 1574, 1535 cm<sup>-1</sup>. HRMS (TOF-ESI)  $m/z$  [M+H]<sup>+</sup> calcd. for C<sub>34</sub>H<sub>38</sub>N<sub>9</sub>O<sub>4</sub>: 636.3041; Found: 636.3019.

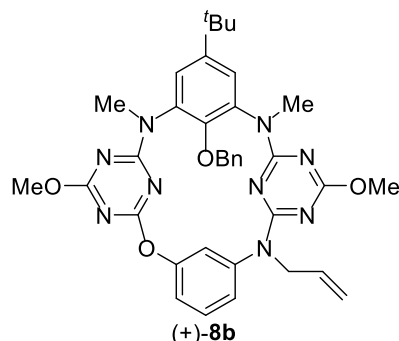

***Sic*-(+)-4-Allyl-7<sup>2</sup>-(benzyloxy)-7<sup>5</sup>-(*t*-butyl)-1<sup>6</sup>,5<sup>6</sup>-dimethoxy-6,8-dimethyl-2-oxa-4,6,8-triaza-1,5(2,4)-ditriazina-3,7(1,3)-dibenzenacyclooctaphane 8b**: white solid, 27.7 mg, 84% yield, 92.0% ee,  $[\alpha]_D^{25} = +83.0^\circ$  ( $c = 0.2$ , CH<sub>2</sub>Cl<sub>2</sub>), mp 64 – 65 °C. <sup>1</sup>H NMR (400 MHz, CDCl<sub>3</sub>)  $\delta$  (ppm): 7.26 - 7.19 (m, 3H), 7.10 (t,  $J = 8.0$  Hz, 1H), 6.98 (d,  $J = 8.0$  Hz, 2H), 6.84 (d,  $J = 2.4$  Hz, 1H), 6.80 - 6.75 (m, 3H), 6.56 (t,  $J = 2.0$  Hz, 1H), 5.92 - 5.82 (m, 1H), 5.06 (d,  $J = 10$  Hz, 1H), 5.03 (d,  $J = 15.6$  Hz, 1H), 4.55 (d,  $J = 12.0$  Hz, 1H), 4.44 - 4.37 (m, 2H), 4.28 (dd,  $J = 14.8, 6.4$  Hz, 1H), 3.98 (s, 3H), 3.94 (s, 3H), 3.35 (s, 3H), 3.33 (s, 3H), 1.15 (s, 9H). <sup>13</sup>C NMR (100 MHz, CDCl<sub>3</sub>)  $\delta$  (ppm): 173.0, 171.9, 171.2, 168.1, 167.3, 166.3, 152.8, 149.8, 147.7, 144.3, 137.9, 136.8, 133.6, 129.7, 128.3, 127.4, 126.6, 126.4, 125.8, 124.9, 123.2, 120.7, 117.8, 73.7, 54.8, 54.0, 52.5, 36.9, 36.4, 34.3, 31.3. IR (KBr)  $\nu$ : 1589 cm<sup>-1</sup>. HRMS (TOF-ESI)  $m/z$  [M+H]<sup>+</sup> calcd. for C<sub>36</sub>H<sub>40</sub>N<sub>9</sub>O<sub>4</sub>: 662.3197; Found: 662.3195.

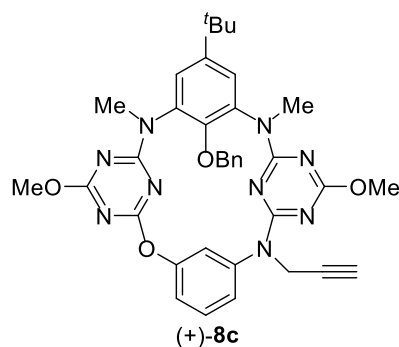

***Sic*-(+)-7<sup>2</sup>-(Benzyloxy)-7<sup>5</sup>-(*t*-butyl)-1<sup>6</sup>,5<sup>6</sup>-dimethoxy-6,8-dimethyl-4-(prop-2-yn-1-yl)-2-oxa-4,6,8-triaza-1,5(2,4)-ditriazina-3,7(1,3)-dibenzenacyclooctaphane 8c**: white solid, 29.6 mg, 90% yield, 91.4% ee,  $[\alpha]_D^{25} = +72.5^\circ$  ( $c = 0.2$ , CH<sub>2</sub>Cl<sub>2</sub>), mp 79 – 80 °C. <sup>1</sup>H NMR (400 MHz, CDCl<sub>3</sub>)  $\delta$  (ppm): 7.26 - 7.19 (m, 3H), 7.14 (t,  $J = 8.0$  Hz, 1H), 6.98 (d,  $J = 6.0$  Hz, 2H), 6.92 (d,  $J = 7.6$  Hz, 1H), 6.84 - 6.80 (m, 3H), 6.72 (t,  $J = 2.0$  Hz, 1H), 4.65 (d,  $J = 17.6$  Hz, 1H), 4.53 (d,  $J = 8$  Hz, 1H), 4.49 (d,  $J = 13.6$  Hz, 1H), 4.40 (d,  $J = 11.6$  Hz, 1H), 4.00 (s, 3H), 3.96 (s, 3H), 3.35 (s, 3H), 3.32 (s, 3H), 2.16 (s, 1H), 1.15 (s, 9H). <sup>13</sup>C NMR (100 MHz, CDCl<sub>3</sub>)  $\delta$  (ppm): 173.0, 172.0, 171.3, 168.1, 167.4, 166.2, 152.9, 149.8, 147.7, 143.6, 137.83, 137.78, 136.8, 129.8, 128.3, 127.4, 126.6, 126.3,

125.7, 125.0, 123.2, 121.2, 79.8, 73.8, 71.9, 54.9, 54.2, 38.9, 36.9, 36.5, 34.3, 31.3. IR (KBr)  $\nu$ : 3294, 1605  $\text{cm}^{-1}$ . HRMS (TOF-ESI)  $m/z$   $[\text{M}+\text{H}]^+$  calcd. for  $\text{C}_{36}\text{H}_{38}\text{N}_9\text{O}_4$ : 660.3041; Found: 660.3035.

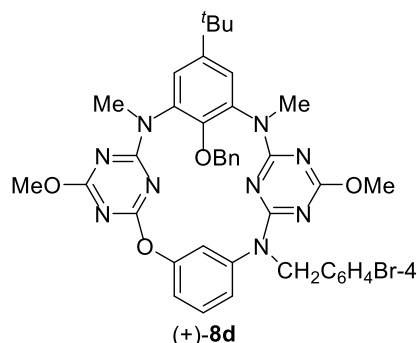

***Sic*-(+)-7<sup>2</sup>-(Benzyloxy)-4-(4-bromobenzyl)-7<sup>5</sup>-(*t*-butyl)-1<sup>6</sup>,5<sup>6</sup>-dimethoxy-6,8-dimethyl-2-oxa-4,6,8-triaza-1,5(2,4)-ditriazina-3,7(1,3)-dibenzenacyclooctaphane 8d**: white solid, 33.8 mg, 86% yield, 90.4% ee,  $[\alpha]_{\text{D}}^{25} = +57^\circ$  ( $c = 0.2$ ,  $\text{CH}_2\text{Cl}_2$ ), mp 105 - 106  $^\circ\text{C}$ .  $^1\text{H}$  NMR (400 MHz,  $\text{CDCl}_3$ )  $\delta$  (ppm): 7.34 (d,  $J = 8.4$  Hz, 2H), 7.27 - 7.23 (m, 3H), 7.08 (d,  $J = 8$  Hz, 2H), 7.05 (t,  $J = 8$  Hz, 1H), 6.96 (d,  $J = 7.6$  Hz, 2H), 6.86 (d,  $J = 2.4$  Hz, 1H), 6.80 (d,  $J = 2.0$  Hz, 1H), 6.75 (d,  $J = 8.4$  Hz, 1H), 6.59 (d,  $J = 8.0$  Hz, 1H), 6.40 (t,  $J = 2.4$  Hz, 1H), 4.96 ( $J = 15.2$  Hz, 1H), 4.90 (d,  $J = 15.2$  Hz, 1H), 4.54 (d,  $J = 11.6$  Hz, 1H), 4.39 (d,  $J = 11.6$  Hz, 1H), 3.99 (s, 3H), 3.97 (s, 3H), 3.36 (s, 3H), 3.35 (s, 3H), 1.16 (s, 9H).  $^{13}\text{C}$  NMR (100 MHz,  $\text{CDCl}_3$ )  $\delta$  (ppm): 173.0, 171.9, 171.3, 168.1, 167.4, 166.7, 152.9, 149.8, 147.7, 143.9, 137.84, 137.77, 137.1, 136.8, 131.5, 130.3, 129.8, 128.3, 127.5, 126.5, 126.3, 125.9, 125.0, 123.0, 121.4, 120.9, 73.7, 54.9, 54.2, 52.6, 36.9, 36.6, 34.3, 31.3. IR (KBr)  $\nu$ : 1574, 1535  $\text{cm}^{-1}$ . HRMS (TOF-ESI)  $m/z$   $[\text{M}+\text{H}]^+$  calcd. for  $\text{C}_{40}\text{H}_{41}\text{BrN}_9\text{O}_4$ : 790.2459; Found: 790.2452.

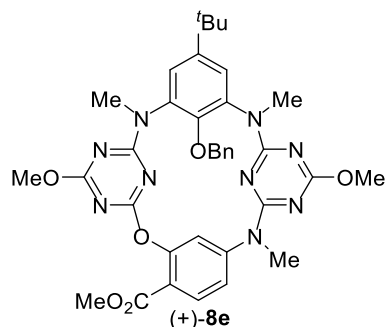

***Sic*-(+)-Methyl 7<sup>2</sup>-(benzyloxy)-7<sup>5</sup>-(*t*-butyl)-1<sup>6</sup>,5<sup>6</sup>-dimethoxy-4,6,8-trimethyl-2-oxa-4,6,8-triaza-1,5(2,4)-ditriazina-3,7(1,3)-dibenzenacyclooctaphane-3<sup>6</sup>-carboxylate 8e**: white solid, 31.1 mg, 90% yield, 96.1% ee,  $[\alpha]_{\text{D}}^{25} = +45.5^\circ$  ( $c = 0.2$ ,  $\text{CH}_2\text{Cl}_2$ ), mp 78 - 79  $^\circ\text{C}$ .  $^1\text{H}$  NMR (400 MHz,  $\text{CDCl}_3$ )  $\delta$  (ppm): 7.80 (d,  $J = 8.4$  Hz, 1H), 7.27 - 7.21 (m, 3H), 6.99 (dd,  $J = 8.0, 2.0$  Hz, 2H), 6.88 (dd,  $J = 8.4, 2.0$  Hz, 1H), 6.83 (d,  $J = 2.8$  Hz, 1H), 6.78 (d,  $J = 2.4$  Hz, 1H), 6.70 (d,  $J = 2.0$  Hz, 1H), 4.51 (d,  $J = 11.6$  Hz, 1H), 4.39 (d,  $J = 11.6$  Hz, 1H), 4.03 (s, 3H), 3.98 (s, 3H), 3.77 (s, 3H), 3.37 (s, 3H), 3.353 (s, 3H), 3.347 (s, 3H), 1.15 (s, 9H).  $^{13}\text{C}$  NMR (100 MHz,  $\text{CDCl}_3$ )  $\delta$  (ppm): 173.2, 171.9, 171.1, 168.1, 166.9, 166.4, 164.3, 153.2, 149.9, 149.8, 147.8, 137.8, 137.7, 137.0, 132.7, 128.4, 127.6, 126.7, 126.2, 125.2, 125.1, 124.0, 121.9, 73.8, 55.0, 54.2, 52.2, 37.1, 36.8, 36.6, 34.3, 31.3. IR (KBr)

$\nu$ : 1728, 1605  $\text{cm}^{-1}$ . HRMS (TOF-ESI)  $m/z$   $[M+H]^+$  calcd. for  $\text{C}_{36}\text{H}_{40}\text{N}_9\text{O}_6$ : 694.3096; Found: 694.3105.

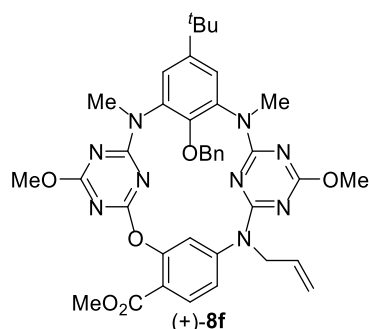

***Sic*-(+)-Methyl 4-allyl-7<sup>2</sup>-(benzyloxy)-7<sup>5</sup>-(*t*-butyl)-1<sup>6</sup>,5<sup>6</sup>-dimethoxy-6,8-dimethyl-2-oxa-4,6,8-triaza-1,5(2,4)-ditriazina-3,7(1,3)-dibenzenacyclooctaphane-3<sup>6</sup>-carboxylate 8f**: white solid, 31.3 mg, 87% yield, 96.7% ee,  $[\alpha]_{\text{D}}^{25} = +48.0^\circ$  ( $c = 0.2$ ,  $\text{CH}_2\text{Cl}_2$ ), mp 76 - 77  $^\circ\text{C}$ .  $^1\text{H}$  NMR (600 MHz,  $\text{CDCl}_3$ )  $\delta$  (ppm): 7.76 (d,  $J = 8.4$  Hz, 1H), 7.25 - 7.19 (m, 3H), 6.97 (d,  $J = 6.0$  Hz, 2H), 6.85 - 6.83 (m, 2H), 6.77 (d,  $J = 2.4$  Hz, 1H), 6.67 (d,  $J = 1.8$  Hz, 1H), 5.90 - 5.84 (m, 1H), 5.09 (d,  $J = 10.2$  Hz, 1H), 5.05 (d,  $J = 17.4$  Hz, 1H), 4.49 (d,  $J = 11.4$  Hz, 1H), 4.42 (dd,  $J = 15.0, 6.0$  Hz, 1H), 4.40 (d,  $J = 12.0$  Hz, 1H), 4.33 (dd,  $J = 15.6, 6.6$  Hz, 1H), 4.03 (s, 3H), 3.96 (s, 3H), 3.76 (s, 3H), 3.35 (s, 3H), 3.34 (s, 3H), 1.15 (s, 9H).  $^{13}\text{C}$  NMR (100 MHz,  $\text{CDCl}_3$ )  $\delta$  (ppm): 173.2, 171.9, 171.0, 168.1, 166.8, 166.0, 164.3, 153.1, 149.8, 148.2, 147.8, 137.8, 137.7, 137.0, 133.2, 132.4, 128.4, 127.6, 126.6, 126.2, 126.1, 125.3, 124.9, 122.0, 118.4, 73.8, 55.0, 54.3, 52.3, 52.2, 36.81, 36.75, 34.3, 31.3. IR (KBr)  $\nu$ : 1728, 1582  $\text{cm}^{-1}$ . HRMS (TOF-ESI)  $m/z$   $[M+H]^+$  calcd. for  $\text{C}_{38}\text{H}_{42}\text{N}_9\text{O}_6$ : 720.3252; Found: 720.3290.

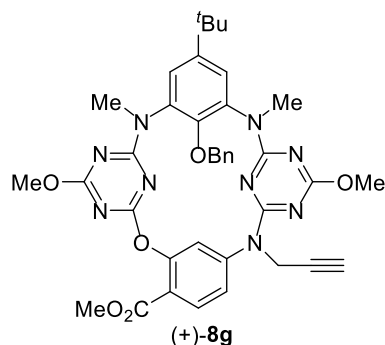

***Sic*-(+)-Methyl 7<sup>2</sup>-(benzyloxy)-7<sup>5</sup>-(*t*-butyl)-1<sup>6</sup>,5<sup>6</sup>-dimethoxy-6,8-dimethyl-4-(prop-2-yn-1-yl)-2-oxa-4,6,8-triaza-1,5(2,4)-ditriazina-3,7(1,3)-dibenzenacyclooctaphane-3<sup>6</sup>-carboxylate 8g**: white solid, 33.7 mg, 94% yield, 94.9% ee,  $[\alpha]_{\text{D}}^{25} = +41.0^\circ$  ( $c = 0.2$ ,  $\text{CH}_2\text{Cl}_2$ ), mp 85 - 86  $^\circ\text{C}$ .  $^1\text{H}$  NMR (400 MHz,  $\text{CDCl}_3$ )  $\delta$  (ppm): 7.80 (d,  $J = 8.4$  Hz, 1H), 7.27 - 7.21 (m, 3H), 6.99 - 6.98 (m, 3H), 6.84 (d,  $J = 2.4$  Hz, 1H), 6.83 (d,  $J = 2.8$  Hz, 1H), 6.78 (d,  $J = 2.4$  Hz, 1H), 4.68 (dd,  $J = 17.6, 2.4$  Hz, 1H), 4.54 (dd,  $J = 17.6, 2.4$  Hz, 1H), 4.47 (d,  $J = 12.0$  Hz, 1H), 4.40 (d,  $J = 11.6$  Hz, 1H), 4.04 (s, 3H), 3.97 (s, 3H), 3.77 (s, 3H), 3.36 (s, 3H), 3.33 (s, 3H), 2.20 (t,  $J = 2.4$  Hz, 1H), 1.16 (s, 9H).  $^{13}\text{C}$  NMR (150 MHz,  $\text{CDCl}_3$ )  $\delta$  (ppm): 173.2, 172.0, 171.2, 168.1, 167.1, 166.0, 164.3, 153.1, 149.9, 147.9, 147.5, 137.8, 137.7, 137.0, 132.5, 128.4, 127.6, 126.7, 126.2, 126.1, 125.4, 125.0,

122.5, 79.4, 73.9, 72.4, 55.0, 54.3, 52.3, 38.5, 36.8, 36.7, 34.3, 31.3. IR (KBr)  $\nu$ : 3287 (w), 2376 (w), 1728, 1605, 1589  $\text{cm}^{-1}$ . HRMS (TOF-ESI)  $m/z$   $[\text{M}+\text{H}]^+$  calcd. for  $\text{C}_{38}\text{H}_{40}\text{N}_9\text{O}_6$ : 718.3096; Found: 718.3095.

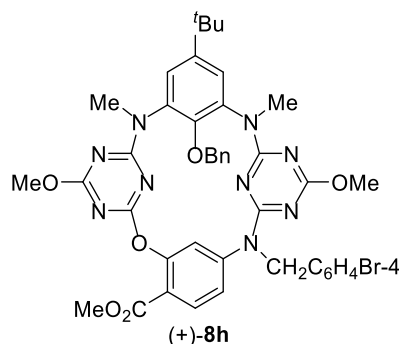

***Sic*-(+)-7<sup>2</sup>-(Benzyloxy)-4-(4-bromobenzyl)-7<sup>5</sup>-(*t*-butyl)-1<sup>6</sup>,5<sup>6</sup>-dimethoxy-6,8-dimethyl-2-oxa-4,6,8-triaza-1,5(2,4)-ditriazina-3,7(1,3)-dibenzenacyclooctaphane-3<sup>6</sup>-carboxylate 8h**: white solid, 35.2 mg, 83% yield, 96.2% ee,  $[\alpha]_{\text{D}}^{25} = +48.0^\circ$  ( $c = 0.2$ ,  $\text{CH}_2\text{Cl}_2$ ), mp 90 - 91  $^\circ\text{C}$ .  $^1\text{H}$  NMR (400 MHz,  $\text{CDCl}_3$ )  $\delta$  (ppm): 7.70 (d,  $J = 8.4$  Hz, 1H), 7.35 (d,  $J = 8.0$  Hz, 2H), 7.27 - 7.23 (m, 3H), 7.07 (d,  $J = 8.0$  Hz, 2H), 6.95 (d,  $J = 6.4$  Hz, 2H), 6.84 (s, 1H), 6.76 (s, 1H), 6.64 (d,  $J = 8.0$  Hz, 1H), 6.50 (s, 1H), 4.97 (d,  $J = 15.2$  Hz, 1H), 4.91 (d,  $J = 14.8$  Hz, 1H), 4.48 (d,  $J = 11.6$  Hz, 1H), 4.38 (d,  $J = 11.6$  Hz, 1H), 4.02 (s, 3H), 3.97 (s, 3H), 3.75 (s, 3H), 3.35 (s, 6H), 1.14 (s, 9H).  $^{13}\text{C}$  NMR (150 MHz,  $\text{CDCl}_3$ )  $\delta$  (ppm): 173.2, 171.9, 171.4, 168.0, 167.3, 166.6, 164.2, 153.1, 149.8, 148.0, 147.8, 137.8, 137.7, 136.9, 136.7, 132.4, 131.7, 130.4, 128.3, 127.6, 126.6, 126.4, 126.1, 125.3, 124.8, 122.2, 121.7, 73.8, 55.0, 54.3, 52.2, 36.8, 36.7, 34.3, 31.3. IR (KBr)  $\nu$  1733, 1614, 1579, 1562  $\text{cm}^{-1}$ . HRMS (TOF-ESI)  $m/z$   $[\text{M}+\text{H}]^+$  calcd. for  $\text{C}_{42}\text{H}_{43}\text{BrN}_9\text{O}_6$ : 848.2514; Found: 850.2483.

## 9.2 Synthesis of 4,6-di(carbazoyl)triazinyl substituted macrocycle 10

**Preparation of 6-chloro-9,9'-di(carbazoyl)-1,3,5-triazine 9<sup>[5]</sup>**:

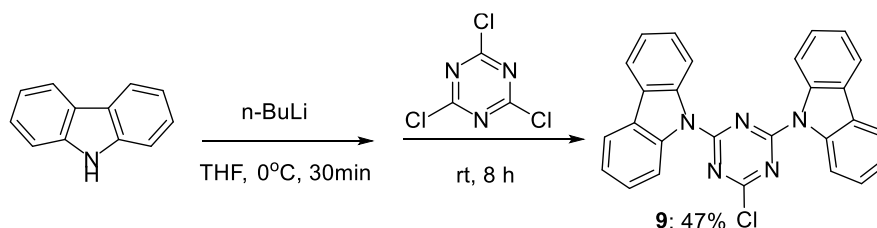

Scheme S10

Under the argon atmosphere, the solution of *n*-BuLi in THF (6.6 mmol, 2.75 mL, 2.4 mol/L in THF) was added dropwise in 1 h into the solution of 9H-carbazole (1.10 g, 6.6 mmol) in dry THF (20 mL) that was cooled in an ice bath. The resulting mixture was stirred for 30 min and then was added dropwise into the solution of 2,4,6-trichloro-1,3,5-triazine (553.2 mg, 3 mmol) in dry THF (10 mL) at 0  $^\circ\text{C}$ . The mixture was stirred for 8 h at ambient temperature. Then the reaction was quenched with water (30 mL) and the mixture was extracted with DCM ( $20 \times 2$  mL). The combined organic layer was washed with saturated aqueous NaCl ( $30 \times 3$  mL) and dried over anhydrous  $\text{Na}_2\text{SO}_4$ . After

filtration and removal of solvents under vacuo, the residue was chromatographed on a silica gel column eluting with a mixture of petroleum ether and ethyl acetate (PE:EA = 5:1) to give 6-chloro-9,9'-di(carbazolyl)-1,3,5-triazine **9** in 47% yield.

(Ref. [5]: C. Li, X. Fan, C. Han, H. Xu, Ternary phosphine oxide host featuring thermally activated delayed fluorescence for blue PHOLEDs with > 20% EQE and extremely low Roll-offs. *J. Mater. Chem. C*, **2018**, 6, 6747-6754.)

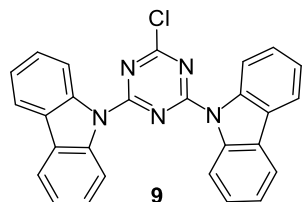

**6-Chloro-9,9'-di(carbazolyl)-1,3,5-triazine **9****<sup>[5]</sup>: pale yellow solid, 628.6 mg, 47% yield, mp = 230 - 231 °C. <sup>1</sup>H NMR (400 MHz, CDCl<sub>3</sub>)  $\delta$  (ppm): 8.93 (d, *J* = 8.4 Hz, 4H), 8.06 (d, *J* = 7.6 Hz, 4H), 7.52 (t, *J* = 7.2 Hz, 4H), 7.45 (t, *J* = 7.6 Hz, 4H). <sup>13</sup>C NMR (100 MHz, CDCl<sub>3</sub>)  $\delta$  (ppm): 170.7, 164.1, 138.6, 127.4, 127.0, 124.2, 119.9, 118.0. IR (KBr)  $\nu$  1551, 1512, 1420 cm<sup>-1</sup>.

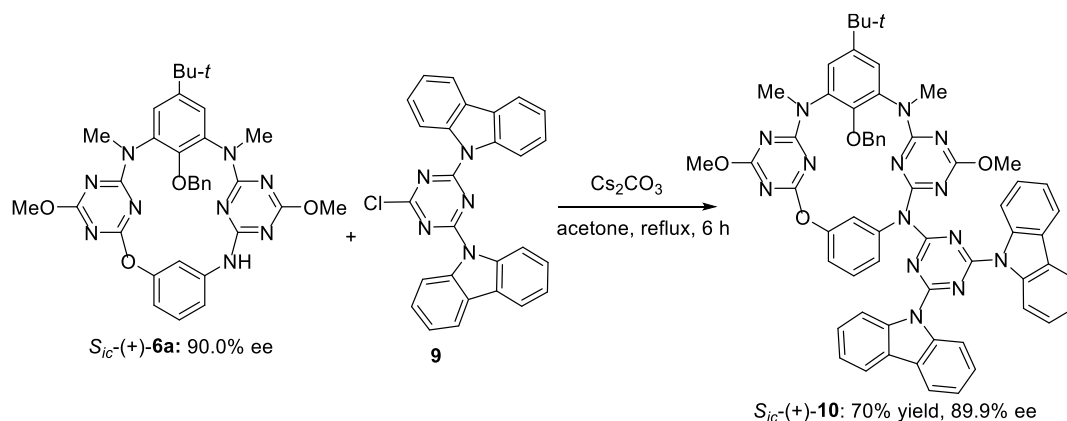

Scheme S11

At ambient temperature, the macrocyclic compound (+)-**6a** (18.6 mg, 0.03 mmol, 90.0% ee), 9,9'-(6-chloro-1,3,5-triazine-2,4-diyl)bis(carbazole) **9** (16.1 mg, 0.036 mmol), Cs<sub>2</sub>CO<sub>3</sub> (19.5 mg, 0.06 mmol) and acetone (2 mL) were added successively into a flask. The resulting mixture was stirred for 6h in refluxing acetone. After the reaction mixture being cooled to room temperature, the inorganic salts were filtrated and washed with ethyl acetate (5 mL). The combined filtrate was concentrated under vacuo and the residue was chromatographed on a silica gel column eluting with a mixture of petroleum ether and ethyl acetate (PE:EA = 4:1) to give the chiral macrocycles (+)-**10** in 70% yields with 90% ee.

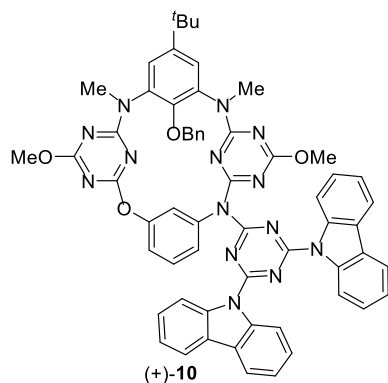

***S<sub>ic</sub>*-(+)-7<sup>2</sup>-(Benzyloxy)-7<sup>5</sup>-(*t*-butyl)-4-(4,6-di(carbazol-9-yl)-1,3,5-triazin-2-yl)-1<sup>6</sup>,5<sup>6</sup>-dimethoxy-6,8-dimethyl-2-oxa-4,6,8-triaza-1,5(2,4)-ditriazina-3,7(1,3)-dibenzenacyclooctaphane **10**:** white solid, 21.6 mg, 70% yield, 89.9% ee,  $[\alpha]_{\text{D}}^{25} = +138.0^\circ$  ( $c = 0.2$ ,  $\text{CH}_2\text{Cl}_2$ ), mp 169 - 171 °C.  $^1\text{H}$  NMR (400 MHz,  $\text{CDCl}_3$ )  $\delta$  (ppm): 8.73 (brs, 4H), 8.03 (dd,  $J = 6.0, 3.2$  Hz, 4H), 7.38 (dd,  $J = 6.0, 3.2$  Hz, 8H), 7.32 (t,  $J = 8.0$  Hz, 1H), 7.18 (t,  $J = 8.0$  Hz, 2H), 7.11 (t,  $J = 6.8$  Hz, 2H), 7.06 - 7.02 (m, 4H), 6.97 (dd,  $J = 6.8, 2.4$  Hz, 2H), 4.65 (d,  $J = 12.0$  Hz, 1H), 4.52 (d,  $J = 12.0$  Hz, 1H), 4.17 (s, 3H), 4.01 (s, 3H), 3.46 (s, 3H), 3.44 (s, 3H), 1.25 (s, 9H).  $^{13}\text{C}$  NMR (100 MHz,  $\text{CDCl}_3$ )  $\delta$  (ppm): 173.1, 172.1, 171.7, 168.1, 167.9, 167.3, 167.2, 164.3, 153.7, 149.8, 148.0, 143.4, 138.9, 137.7, 137.1, 136.9, 130.2, 128.3, 127.4, 127.0, 126.7, 126.4, 126.0, 125.3, 123.3, 123.2, 121.5, 119.5, 117.7, 73.9, 54.9, 54.8, 36.94, 36.90, 34.4, 31.4. IR (KBr)  $\nu$ : 1574, 1535  $\text{cm}^{-1}$ . HRMS (TOF-ESI)  $m/z$   $[\text{M}+\text{H}]^+$  calcd. for  $\text{C}_{60}\text{H}_{51}\text{N}_{14}\text{O}_4$ : 1031.4212; Found: 1031.4203.

#### **10. Crystal data and structure refinements for products (±)-6a, (±)-6d, (±)-6j, *S<sub>ic</sub>*-(+)-6b, (±)-8d and *S<sub>ic</sub>*-(+)-8a**

Single crystals of compounds (±)-**6a** (CCDC: 2303849), (±)-**6d** (CCDC: 2303851), (±)-**6j** (CCDC 2303853), and *S<sub>ic</sub>*-(+)-**8a** (CCDC: 2304021) were obtained by slow evaporation of the solution of the corresponding compounds in dichloromethane and *n*-hexane. Single crystals of compound *S<sub>ic</sub>*-(+)-**6b** (CCDC: 2304020) that was recrystallized from THF and methanol was obtained by slow evaporation of the solution in dichloromethane and *n*-hexane. Single crystals of compound (±)-**8d** (CCDC: 2304018) were obtained by slow evaporation of the solution of (±)-**8d** in chloroform and *n*-hexane. Crystallographic data of compounds (±)-**6a**, (±)-**6d**, (±)-**6j**, *S<sub>ic</sub>*-(+)-**6b**, (±)-**8d** and *S<sub>ic</sub>*-(+)-**8a** were collected on a XtaLAB Synergy R, DW system, HyPix diffractometer equipped with graphite monochromatized  $\text{CuK}\alpha$  radiation ( $\lambda = 1.54184 \text{ \AA}$ ) at 100 K. The crystal data and structure refinement results are listed in the Table S4-S9.

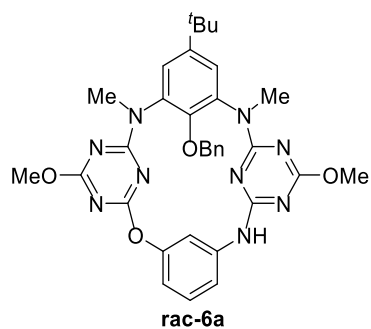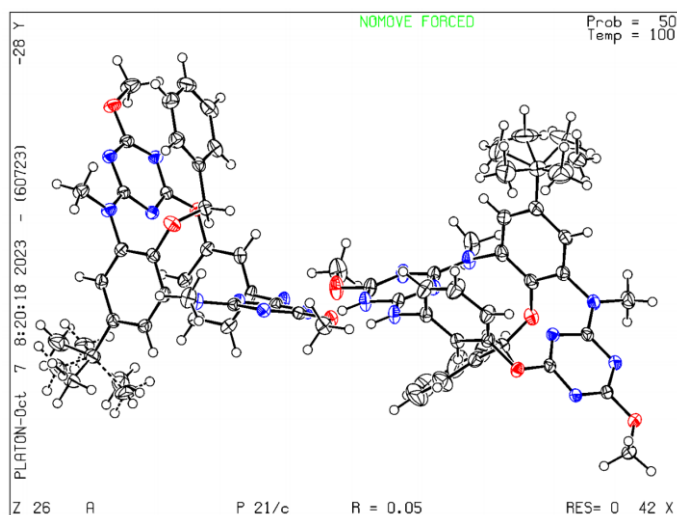

**Figure S1.** X-ray molecular structure of (±)-**6a**. The ellipsoid contour probability level is 50%.

**Table S4.** Crystal data and structure refinement for (±)-**6a**

|                       |                                                               |
|-----------------------|---------------------------------------------------------------|
| Identification code   | A                                                             |
| Empirical formula     | C <sub>33</sub> H <sub>35</sub> N <sub>9</sub> O <sub>4</sub> |
| Formula weight        | 621.70                                                        |
| Temperature/K         | 100.15                                                        |
| Crystal system        | monoclinic                                                    |
| Space group           | P2 <sub>1</sub> /c                                            |
| a/Å                   | 19.0635(2)                                                    |
| b/Å                   | 15.8724(2)                                                    |
| c/Å                   | 21.4307(2)                                                    |
| α/°                   | 90                                                            |
| β/°                   | 91.9570(10)                                                   |
| γ/°                   | 90                                                            |
| Volume/Å <sup>3</sup> | 6480.79(12)                                                   |
| Z                     | 8                                                             |

|                                                |                                                                |
|------------------------------------------------|----------------------------------------------------------------|
| $\rho_{\text{calc}}/\text{cm}^3$               | 1.274                                                          |
| $\mu/\text{mm}^{-1}$                           | 0.711                                                          |
| F(000)                                         | 2624.0                                                         |
| Crystal size/ $\text{mm}^3$                    | $0.2 \times 0.1 \times 0.05$                                   |
| Radiation                                      | $\text{CuK}\alpha$ ( $\lambda = 1.54184$ )                     |
| $2\theta$ range for data collection/ $^\circ$  | 4.638 to 124.998                                               |
| Index ranges                                   | $-21 \leq h \leq 21, -17 \leq k \leq 18, -24 \leq l \leq 24$   |
| Reflections collected                          | 56351                                                          |
| Independent reflections                        | 10348 [ $R_{\text{int}} = 0.0388, R_{\text{sigma}} = 0.0254$ ] |
| Data/restraints/parameters                     | 10348/90/883                                                   |
| Goodness-of-fit on $F^2$                       | 1.027                                                          |
| Final R indexes [ $I \geq 2\sigma(I)$ ]        | $R_1 = 0.0472, wR_2 = 0.1293$                                  |
| Final R indexes [all data]                     | $R_1 = 0.0542, wR_2 = 0.1355$                                  |
| Largest diff. peak/hole / $e \text{ \AA}^{-3}$ | 0.68/-0.57                                                     |
| CCDC No.                                       | 2303849                                                        |

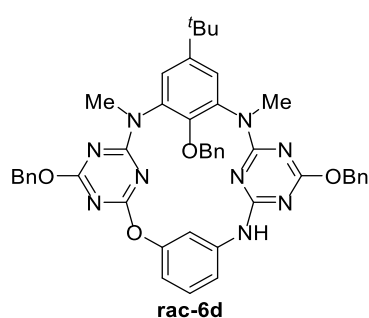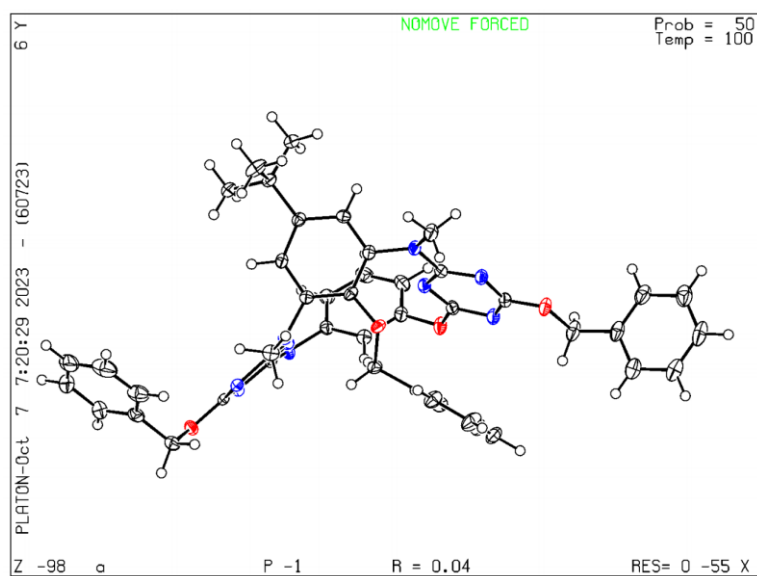

**Figure S2.** X-ray molecular structure of ( $\pm$ )-**6d**. The ellipsoid contour probability level is 50%.

**Table S5.** Crystal data and structure refinement for (±)-**6d**

|                                             |                                                                |
|---------------------------------------------|----------------------------------------------------------------|
| Identification code                         | a                                                              |
| Empirical formula                           | C <sub>45</sub> H <sub>43</sub> N <sub>9</sub> O <sub>4</sub>  |
| Formula weight                              | 773.88                                                         |
| Temperature/K                               | 100.15                                                         |
| Crystal system                              | triclinic                                                      |
| Space group                                 | P-1                                                            |
| a/Å                                         | 10.0108(2)                                                     |
| b/Å                                         | 12.9368(3)                                                     |
| c/Å                                         | 17.2186(4)                                                     |
| $\alpha$ /°                                 | 105.174(2)                                                     |
| $\beta$ /°                                  | 98.881(2)                                                      |
| $\gamma$ /°                                 | 107.685(2)                                                     |
| Volume/Å <sup>3</sup>                       | 1983.04(8)                                                     |
| Z                                           | 2                                                              |
| $\rho_{\text{calc}}/\text{cm}^3$            | 1.296                                                          |
| $\mu/\text{mm}^{-1}$                        | 0.691                                                          |
| F(000)                                      | 816.0                                                          |
| Crystal size/mm <sup>3</sup>                | 0.2 × 0.1 × 0.05                                               |
| Radiation                                   | CuK $\alpha$ ( $\lambda$ = 1.54184)                            |
| 2 $\Theta$ range for data collection/°      | 5.498 to 124.978                                               |
| Index ranges                                | -11 ≤ h ≤ 9, -14 ≤ k ≤ 14, -19 ≤ l ≤ 19                        |
| Reflections collected                       | 33123                                                          |
| Independent reflections                     | 6323 [ $R_{\text{int}}$ = 0.0219, $R_{\text{sigma}}$ = 0.0120] |
| Data/restraints/parameters                  | 6323/0/524                                                     |
| Goodness-of-fit on F <sup>2</sup>           | 0.999                                                          |
| Final R indexes [ $I \geq 2\sigma(I)$ ]     | $R_1$ = 0.0365, $wR_2$ = 0.0922                                |
| Final R indexes [all data]                  | $R_1$ = 0.0373, $wR_2$ = 0.0928                                |
| Largest diff. peak/hole / e Å <sup>-3</sup> | 0.49/-0.39                                                     |
| CCDC No.                                    | 2303851                                                        |

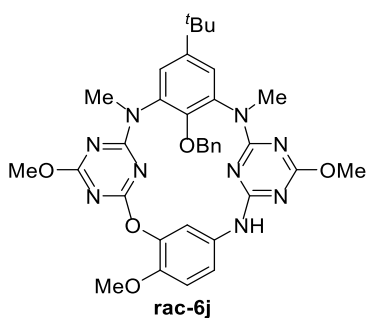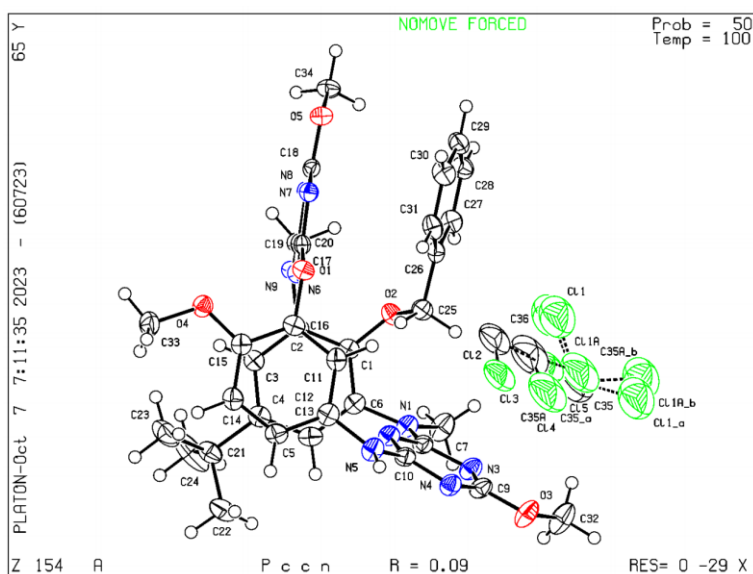

**Figure S3.** X-ray molecular structure of (±)-**6j**. The ellipsoid contour probability level is 50%.

**Table S6.** Crystal data and structure refinement for (±)-**6j**

|                       |                                                                    |
|-----------------------|--------------------------------------------------------------------|
| Identification code   | A                                                                  |
| Empirical formula     | C <sub>34.5</sub> H <sub>38</sub> N <sub>9</sub> O <sub>5</sub> Cl |
| Formula weight        | 694.19                                                             |
| Temperature/K         | 100.15                                                             |
| Crystal system        | orthorhombic                                                       |
| Space group           | Pccn                                                               |
| a/Å                   | 14.2497(2)                                                         |
| b/Å                   | 36.7753(5)                                                         |
| c/Å                   | 14.4950(2)                                                         |
| α/°                   | 90                                                                 |
| β/°                   | 90                                                                 |
| γ/°                   | 90                                                                 |
| Volume/Å <sup>3</sup> | 7595.92(18)                                                        |

|                                                |                                                               |
|------------------------------------------------|---------------------------------------------------------------|
| Z                                              | 8                                                             |
| $\rho_{\text{calc}}/\text{cm}^3$               | 1.214                                                         |
| $\mu/\text{mm}^{-1}$                           | 1.311                                                         |
| F(000)                                         | 2920.0                                                        |
| Crystal size/ $\text{mm}^3$                    | $0.2 \times 0.1 \times 0.05$                                  |
| Radiation                                      | $\text{CuK}\alpha$ ( $\lambda = 1.54184$ )                    |
| $2\Theta$ range for data collection/ $^\circ$  | 6.652 to 125                                                  |
| Index ranges                                   | $-14 \leq h \leq 16, -42 \leq k \leq 40, -10 \leq l \leq 16$  |
| Reflections collected                          | 34722                                                         |
| Independent reflections                        | 6052 [ $R_{\text{int}} = 0.0408, R_{\text{sigma}} = 0.0280$ ] |
| Data/restraints/parameters                     | 6052/68/475                                                   |
| Goodness-of-fit on $F^2$                       | 1.202                                                         |
| Final R indexes [ $I \geq 2\sigma(I)$ ]        | $R_1 = 0.0857, wR_2 = 0.2538$                                 |
| Final R indexes [all data]                     | $R_1 = 0.0893, wR_2 = 0.2575$                                 |
| Largest diff. peak/hole / $e \text{ \AA}^{-3}$ | 2.02/-0.79                                                    |
| CCDC No.                                       | 2303853                                                       |

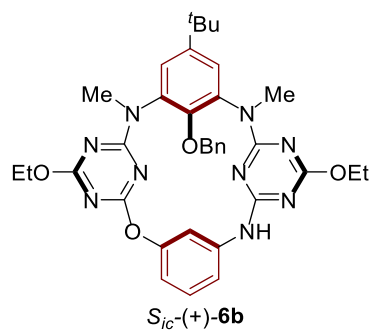

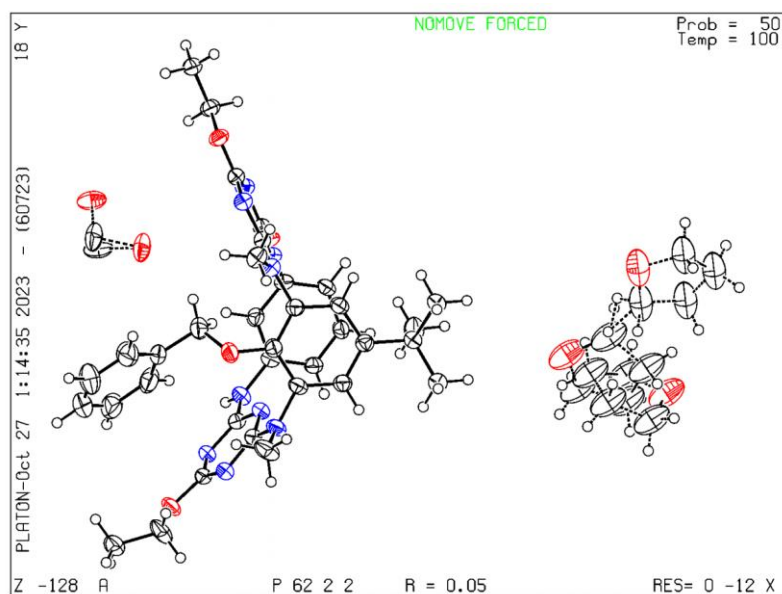

**Figure S4.** X-ray molecular structure of  $S_{ic}-(+)$ -**6b**. The ellipsoid contour probability level is 50%.

**Table S7.** Crystal data and structure refinement for  $S_{ic}-(+)$ -**6b**

|                                               |                                            |
|-----------------------------------------------|--------------------------------------------|
| Identification code                           | A                                          |
| Empirical formula                             | $C_{36.25}H_{42}N_9O_{4.5}$                |
| Formula weight                                | 675.79                                     |
| Temperature/K                                 | 100.15                                     |
| Crystal system                                | hexagonal                                  |
| Space group                                   | $P6_222$                                   |
| $a/\text{\AA}$                                | 17.07750(10)                               |
| $b/\text{\AA}$                                | 17.07750(10)                               |
| $c/\text{\AA}$                                | 48.3005(3)                                 |
| $\alpha/^\circ$                               | 90                                         |
| $\beta/^\circ$                                | 90                                         |
| $\gamma/^\circ$                               | 120                                        |
| Volume/ $\text{\AA}^3$                        | 12199.18(16)                               |
| Z                                             | 12                                         |
| $\rho_{\text{calc}}/\text{g cm}^{-3}$         | 1.104                                      |
| $\mu/\text{mm}^{-1}$                          | 0.611                                      |
| $F(000)$                                      | 4302.0                                     |
| Crystal size/ $\text{mm}^3$                   | $0.2 \times 0.2 \times 0.05$               |
| Radiation                                     | $\text{CuK}\alpha$ ( $\lambda = 1.54184$ ) |
| $2\theta$ range for data collection/ $^\circ$ | 7.008 to 124.982                           |

|                                                |                                                               |
|------------------------------------------------|---------------------------------------------------------------|
| Index ranges                                   | $-17 \leq h \leq 19, -19 \leq k \leq 19, -55 \leq l \leq 55$  |
| Reflections collected                          | 238456                                                        |
| Independent reflections                        | 6484 [ $R_{\text{int}} = 0.1015, R_{\text{sigma}} = 0.0210$ ] |
| Data/restraints/parameters                     | 6484/137/482                                                  |
| Goodness-of-fit on $F^2$                       | 1.097                                                         |
| Final R indexes [ $I \geq 2\sigma(I)$ ]        | $R_1 = 0.0539, wR_2 = 0.1485$                                 |
| Final R indexes [all data]                     | $R_1 = 0.0572, wR_2 = 0.1518$                                 |
| Largest diff. peak/hole / $e \text{ \AA}^{-3}$ | 0.72/-0.21                                                    |
| Flack parameter                                | -0.03(7)                                                      |
| CCDC No.                                       | 2304020                                                       |

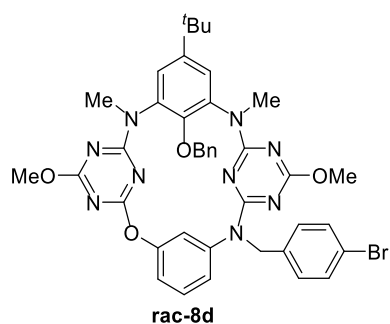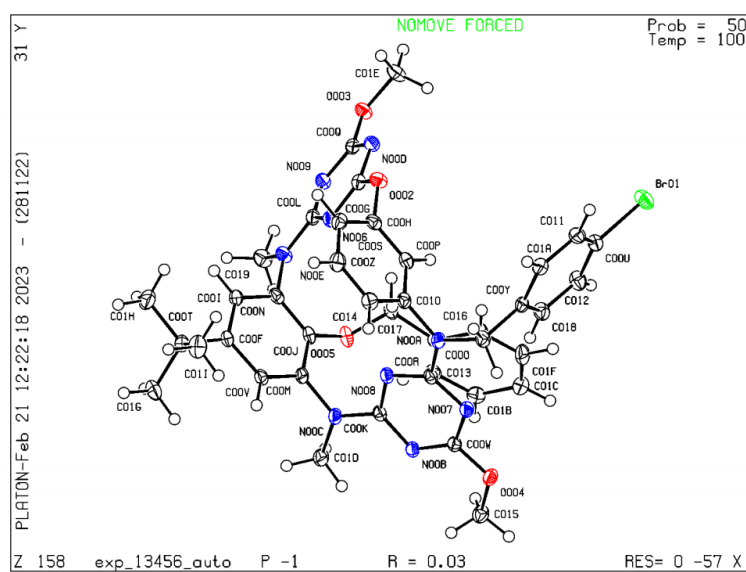

**Figure S5.** X-ray molecular structure of (±)-**8d**. The ellipsoid contour probability level is 50%.

**Table S8.** Crystal data and structure refinement for (±)-**8d**

|                     |                        |
|---------------------|------------------------|
| Identification code | exp_13456_auto         |
| Empirical formula   | $C_{40}H_{40}BrN_9O_4$ |
| Formula weight      | 790.72                 |

|                                                |                                                                |
|------------------------------------------------|----------------------------------------------------------------|
| Temperature/K                                  | 99.99(10)                                                      |
| Crystal system                                 | triclinic                                                      |
| Space group                                    | P-1                                                            |
| a/Å                                            | 11.19970(10)                                                   |
| b/Å                                            | 11.6776(2)                                                     |
| c/Å                                            | 15.8142(3)                                                     |
| $\alpha/^\circ$                                | 74.250(2)                                                      |
| $\beta/^\circ$                                 | 73.2240(10)                                                    |
| $\gamma/^\circ$                                | 70.731(2)                                                      |
| Volume/Å <sup>3</sup>                          | 1833.45(6)                                                     |
| Z                                              | 2                                                              |
| $\rho_{\text{calc}}/\text{g}/\text{cm}^3$      | 1.432                                                          |
| $\mu/\text{mm}^{-1}$                           | 1.985                                                          |
| F(000)                                         | 820.0                                                          |
| Crystal size/mm <sup>3</sup>                   | 0.01 × 0.01 × 0.01                                             |
| Radiation                                      | Cu K $\alpha$ ( $\lambda$ = 1.54184)                           |
| 2 $\Theta$ range for data collection/ $^\circ$ | 8.178 to 152.86                                                |
| Index ranges                                   | -14 ≤ h ≤ 13, -14 ≤ k ≤ 14, -19 ≤ l ≤ 19                       |
| Reflections collected                          | 79604                                                          |
| Independent reflections                        | 7356 [ $R_{\text{int}}$ = 0.0542, $R_{\text{sigma}}$ = 0.0192] |
| Data/restraints/parameters                     | 7356/0/494                                                     |
| Goodness-of-fit on $F^2$                       | 1.033                                                          |
| Final R indexes [ $I \geq 2\sigma(I)$ ]        | $R_1$ = 0.0313, $wR_2$ = 0.0801                                |
| Final R indexes [all data]                     | $R_1$ = 0.0325, $wR_2$ = 0.0808                                |
| Largest diff. peak/hole / e Å <sup>-3</sup>    | 0.26/-0.59                                                     |
| CCDC No.                                       | 2304018                                                        |

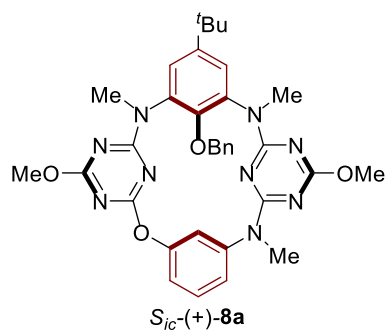

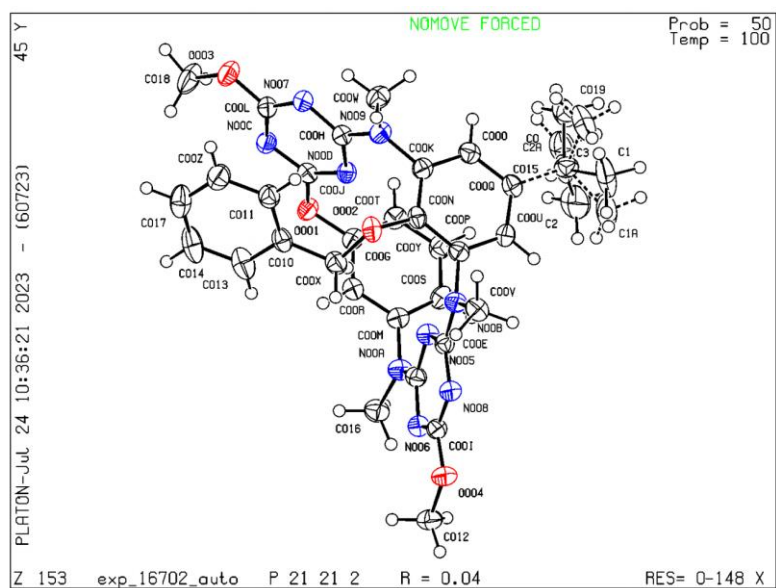

**Figure S6.** X-ray molecular structure of  $S_{ic}$ -(+)-**8a**. The ellipsoid contour probability level is 50%.

**Table S9.** Crystal data and structure refinement for  $S_{ic}$ -(+)-**8a**

|                                       |                                       |
|---------------------------------------|---------------------------------------|
| Identification code                   | exp_16702_auto                        |
| Empirical formula                     | $C_{34}H_{37}N_9O_4$                  |
| Formula weight                        | 635.731                               |
| Temperature/K                         | 99.99(10)                             |
| Crystal system                        | orthorhombic                          |
| Space group                           | $P2_12_12$                            |
| $a/\text{\AA}$                        | 24.6160(7)                            |
| $b/\text{\AA}$                        | 13.0934(5)                            |
| $c/\text{\AA}$                        | 9.9979(3)                             |
| $\alpha/^\circ$                       | 90                                    |
| $\beta/^\circ$                        | 90                                    |
| $\gamma/^\circ$                       | 90                                    |
| Volume/ $\text{\AA}^3$                | 3222.39(18)                           |
| Z                                     | 4                                     |
| $\rho_{\text{calc}}/\text{g cm}^{-3}$ | 1.310                                 |
| $\mu/\text{mm}^{-1}$                  | 0.727                                 |
| $F(000)$                              | 1348.6                                |
| Crystal size/ $\text{mm}^3$           | $0.15 \times 0.1 \times 0.05$         |
| Radiation                             | Cu K $\alpha$ ( $\lambda = 1.54184$ ) |

|                                                  |                                                                    |
|--------------------------------------------------|--------------------------------------------------------------------|
| 2 $\Theta$ range for data collection/ $^{\circ}$ | 7.18 to 154.18                                                     |
| Index ranges                                     | $-30 \leq h \leq 26$ , $-16 \leq k \leq 16$ , $-12 \leq l \leq 12$ |
| Reflections collected                            | 27752                                                              |
| Independent reflections                          | 6548 [ $R_{\text{int}} = 0.0522$ , $R_{\text{sigma}} = 0.0321$ ]   |
| Data/restraints/parameters                       | 6548/20/472                                                        |
| Goodness-of-fit on $F^2$                         | 1.041                                                              |
| Final R indexes [ $I \geq 2\sigma(I)$ ]          | $R_1 = 0.0420$ , $wR_2 = 0.1057$                                   |
| Final R indexes [all data]                       | $R_1 = 0.0466$ , $wR_2 = 0.1141$                                   |
| Largest diff. peak/hole / $e \text{ \AA}^{-3}$   | 0.20/-0.23                                                         |
| Flack parameter                                  | -0.07(7)                                                           |
| CCDC No.                                         | 2304021                                                            |

---

## 11. HPLC spectra of products 6, 8 and 10

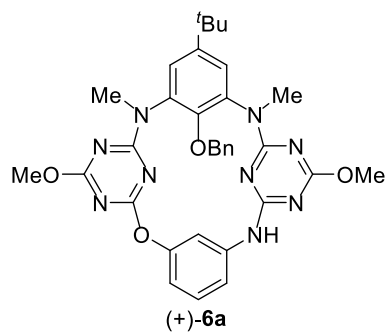

HPLC: IBN5 column, Hexane : *i*-PrOH = 95 : 5, flow rate 0.8 mL/min, 254 nm, 25  $^{\circ}$ C, 93.2% ee.

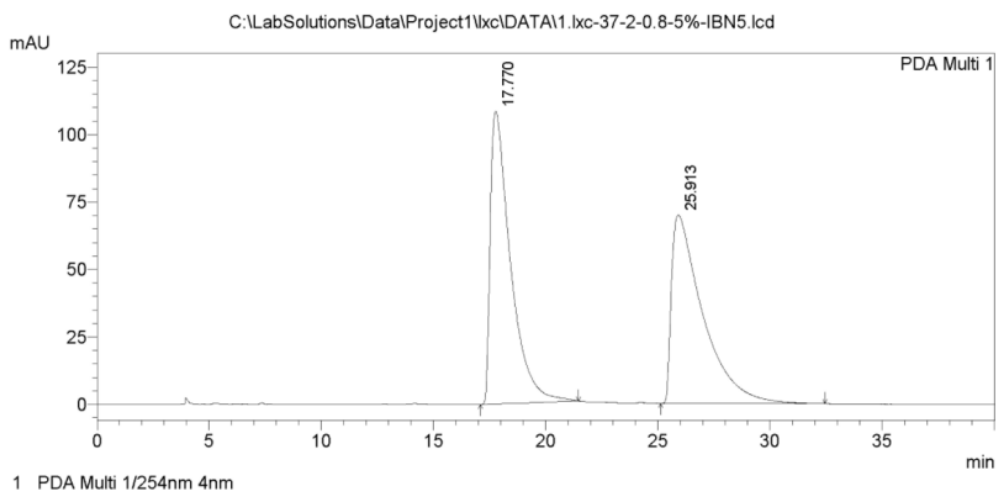

PeakTable

| Peak# | Ret. Time | Area     | Height | Area %  | Height % |
|-------|-----------|----------|--------|---------|----------|
| 1     | 17.770    | 6808233  | 108555 | 50.070  | 60.834   |
| 2     | 25.913    | 6789331  | 69890  | 49.930  | 39.166   |
| Total |           | 13597564 | 178445 | 100.000 | 100.000  |

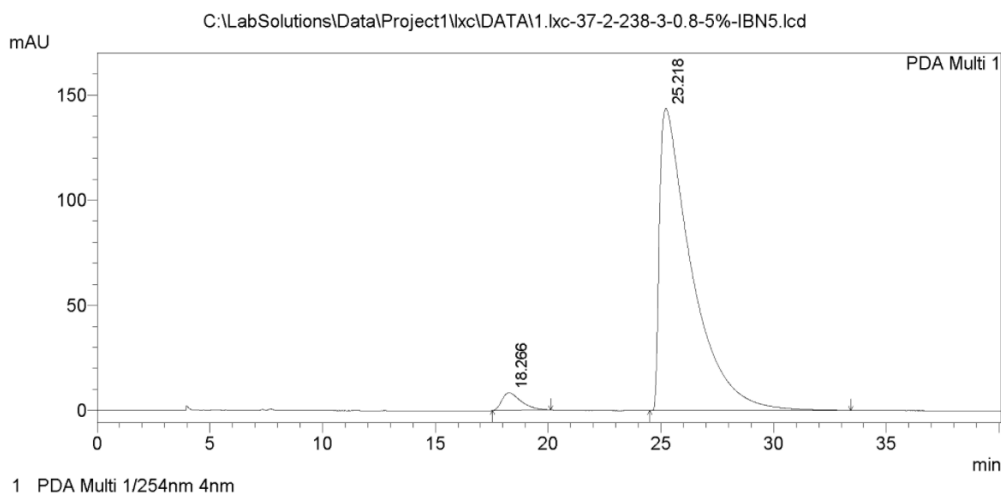

PeakTable

| Peak# | Ret. Time | Area     | Height | Area %  | Height % |
|-------|-----------|----------|--------|---------|----------|
| 1     | 18.266    | 499011   | 8343   | 3.401   | 5.487    |
| 2     | 25.218    | 14172651 | 143695 | 96.599  | 94.513   |
| Total |           | 14671662 | 152038 | 100.000 | 100.000  |

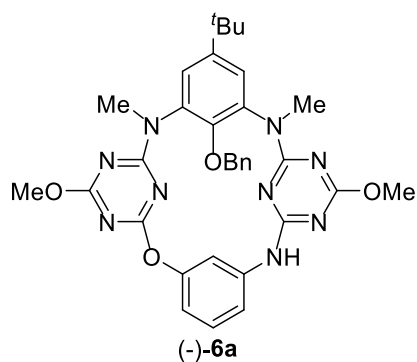

HPLC: IBN5 column, Hexane : *i*-PrOH = 95 : 5, flow rate 0.8 mL/min, 254 nm, 25 °C, 90.0% ee.

### <Chromatogram>

mV

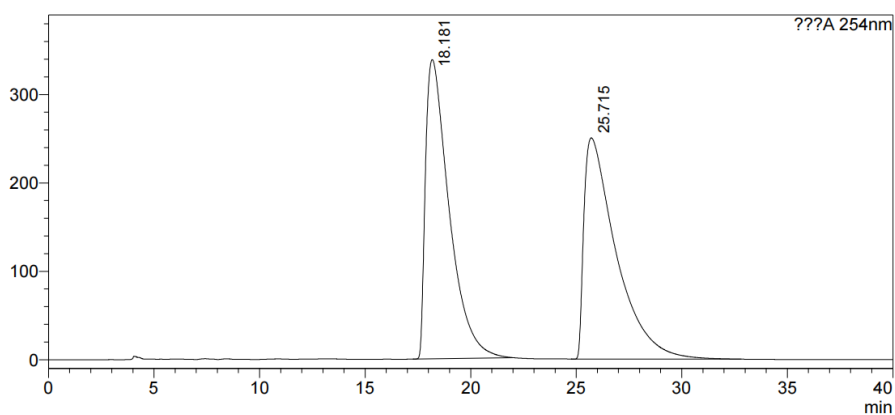

### <Peak Table>

??A 254nm

| Peak# | Ret. Time | Area     | Height | Conc.  | Area%   | Height% |
|-------|-----------|----------|--------|--------|---------|---------|
| 1     | 18.181    | 26363809 | 338620 | 49.843 | 49.843  | 57.493  |
| 2     | 25.715    | 26530110 | 250352 | 50.157 | 50.157  | 42.507  |
| Total |           | 52893919 | 588972 |        | 100.000 | 100.000 |

### <Chromatogram>

mV

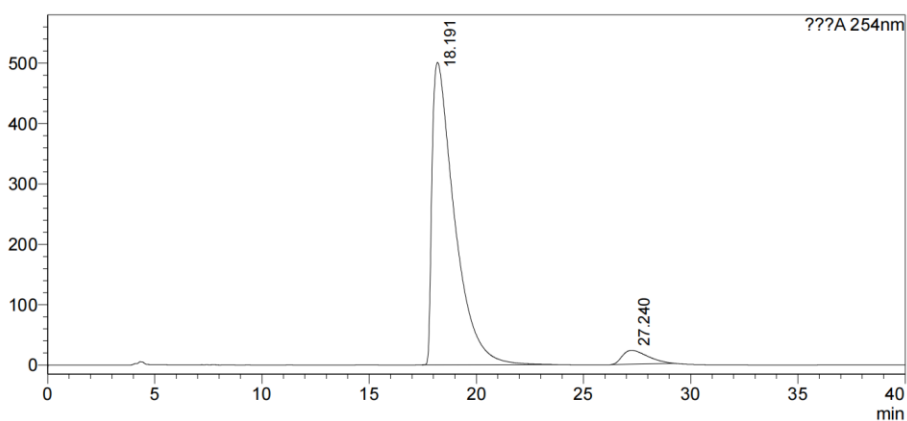

### <Peak Table>

??A 254nm

| Peak# | Ret. Time | Area     | Height | Conc.  | Area%   | Height% |
|-------|-----------|----------|--------|--------|---------|---------|
| 1     | 18.191    | 36404785 | 500734 | 95.007 | 95.007  | 95.596  |
| 2     | 27.240    | 1913088  | 23070  | 4.993  | 4.993   | 4.404   |
| Total |           | 38317873 | 523804 |        | 100.000 | 100.000 |

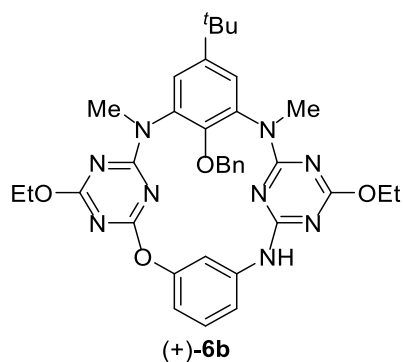

HPLC: IBN5 column, Hexane : *i*-PrOH = 95 : 5, flow rate 0.8 mL/min, 254 nm, 25 °C, 94.2% ee.

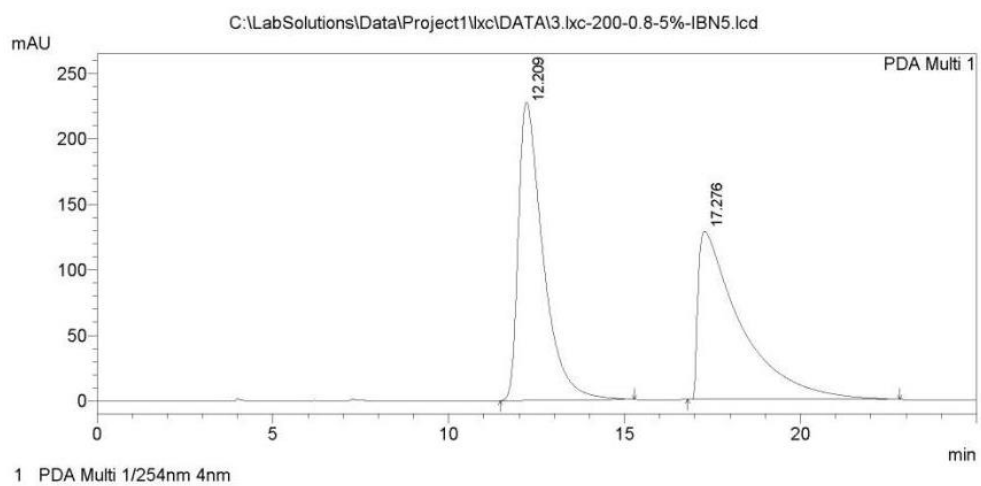

PeakTable

PDA Ch1 254nm 4nm

| Peak# | Ret. Time | Area     | Height | Area %  | Height % |
|-------|-----------|----------|--------|---------|----------|
| 1     | 12.209    | 11085827 | 227700 | 50.685  | 63.972   |
| 2     | 17.276    | 10786122 | 128237 | 49.315  | 36.028   |
| Total |           | 21871948 | 355936 | 100.000 | 100.000  |

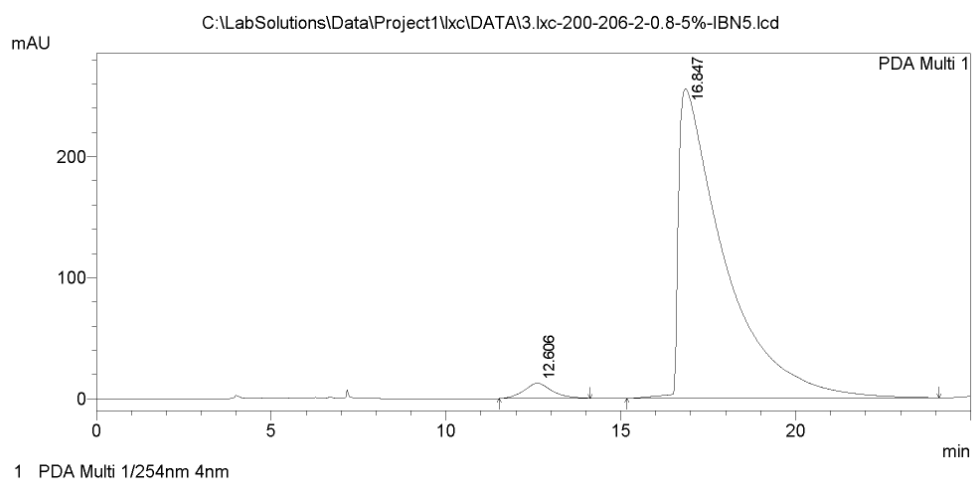

PeakTable

PDA Ch1 254nm 4nm

| Peak# | Ret. Time | Area     | Height | Area %  | Height % |
|-------|-----------|----------|--------|---------|----------|
| 1     | 12.606    | 690701   | 12509  | 2.881   | 4.670    |
| 2     | 16.847    | 23282296 | 255348 | 97.119  | 95.330   |
| Total |           | 23972997 | 267857 | 100.000 | 100.000  |

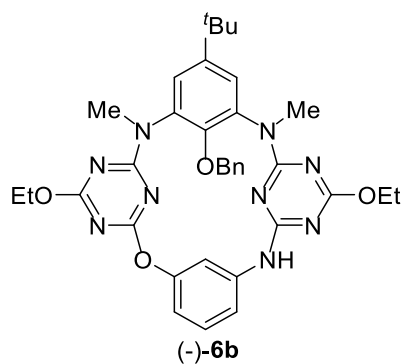

HPLC: IBN5 column, Hexane : *i*-PrOH = 95 : 5, flow rate 0.8 mL/min, 254 nm, 25 °C, 90.7% ee.

# <Chromatogram>

mV

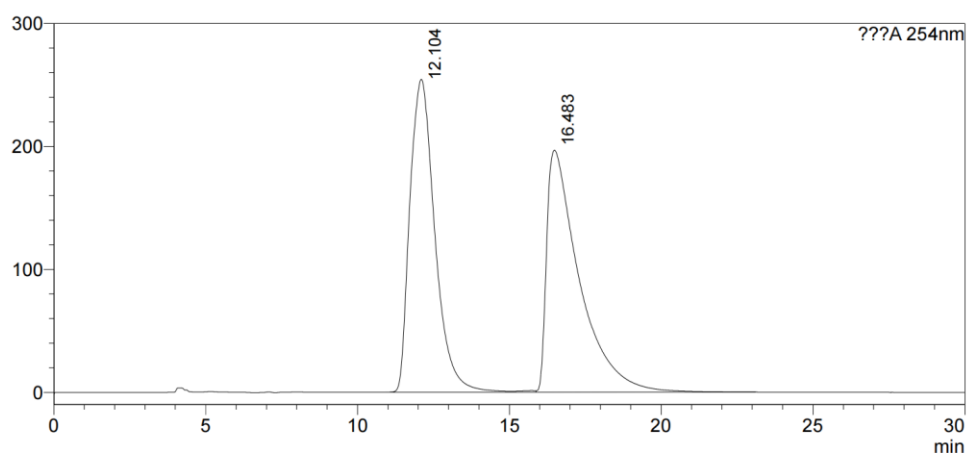

## <Peak Table>

??A 254nm

| Peak# | Ret. Time | Area     | Height | Conc.  | Area%   | Height% |
|-------|-----------|----------|--------|--------|---------|---------|
| 1     | 12.104    | 14620789 | 254581 | 49.902 | 49.902  | 56.403  |
| 2     | 16.483    | 14678460 | 196776 | 50.098 | 50.098  | 43.597  |
| Total |           | 29299249 | 451358 |        | 100.000 | 100.000 |

# <Chromatogram>

mV

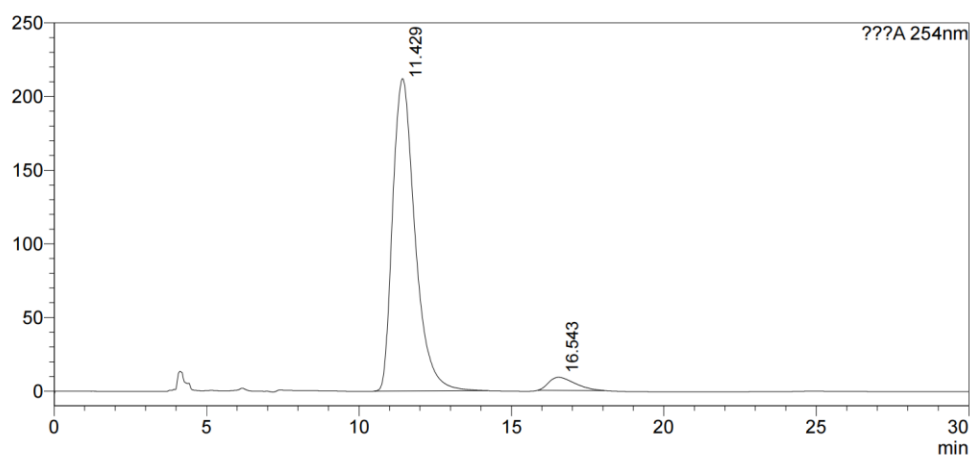

## <Peak Table>

??A 254nm

| Peak# | Ret. Time | Area     | Height | Conc.  | Area%   | Height% |
|-------|-----------|----------|--------|--------|---------|---------|
| 1     | 11.429    | 10841988 | 212152 | 95.374 | 95.374  | 95.986  |
| 2     | 16.543    | 525832   | 8872   | 4.626  | 4.626   | 4.014   |
| Total |           | 11367820 | 221024 |        | 100.000 | 100.000 |

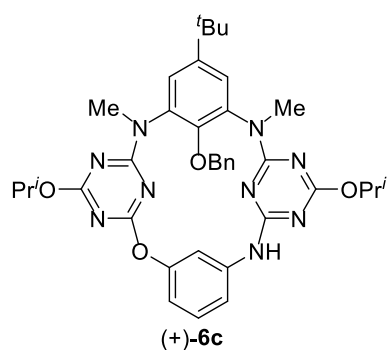

HPLC: IBN5 column, Hexane : *i*-PrOH = 95 : 5, flow rate 0.8 mL/min, 254 nm, 25 °C, 91.4% ee.

# <Chromatogram>

mV

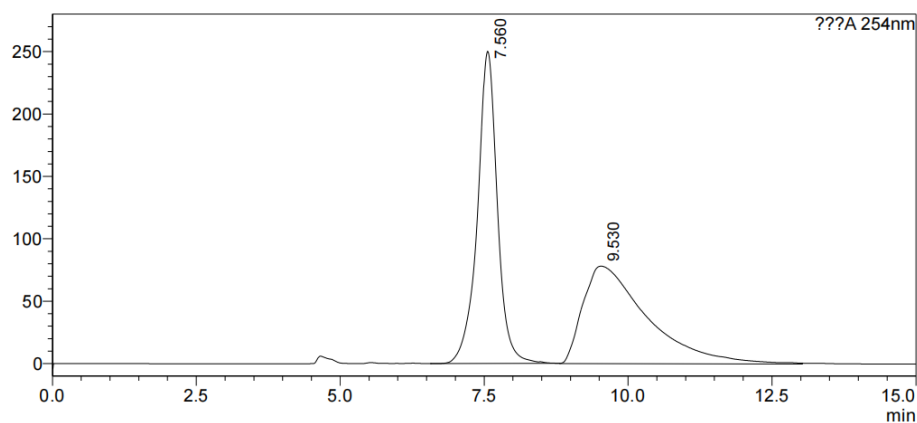

## <Peak Table>

??A 254nm

| Peak# | Ret. Time | Area     | Height | Conc.  | Area%   | Height% |
|-------|-----------|----------|--------|--------|---------|---------|
| 1     | 7.560     | 6030646  | 250090 | 49.851 | 49.851  | 76.220  |
| 2     | 9.530     | 6066809  | 78025  | 50.149 | 50.149  | 23.780  |
| Total |           | 12097455 | 328115 |        | 100.000 | 100.000 |

# <Chromatogram>

mV

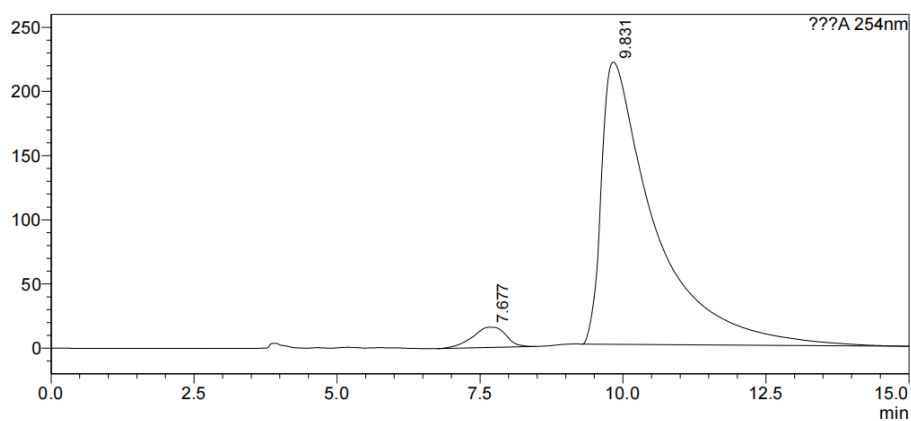

## <Peak Table>

??A 254nm

| Peak# | Ret. Time | Area     | Height | Conc.  | Area%   | Height% |
|-------|-----------|----------|--------|--------|---------|---------|
| 1     | 7.677     | 641603   | 15728  | 4.289  | 4.289   | 6.679   |
| 2     | 9.831     | 14318499 | 219780 | 95.711 | 95.711  | 93.321  |
| Total |           | 14960102 | 235508 |        | 100.000 | 100.000 |

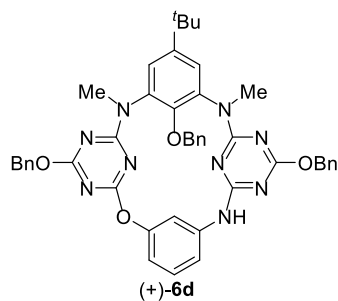

HPLC: IBN5 column, Hexane : *i*-PrOH = 93 : 7, flow rate 0.7 mL/min, 254 nm, 25 °C, 83.4% ee (98.4% ee after recrystallization).

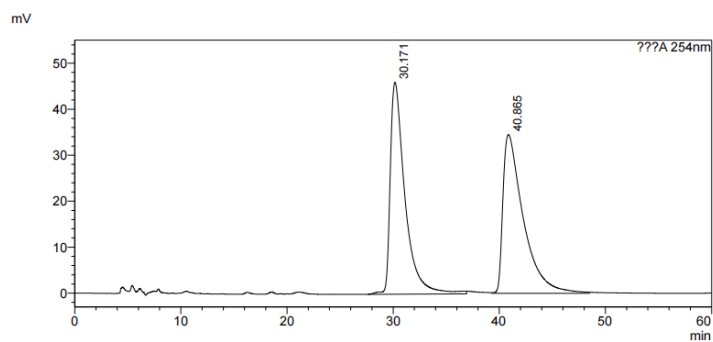

<Peak Table>

| ???A 254nm |           |         |        |        |         |         |
|------------|-----------|---------|--------|--------|---------|---------|
| Peak#      | Ret. Time | Area    | Height | Conc.  | Area%   | Height% |
| 1          | 30.171    | 4469341 | 46111  | 49.179 | 49.179  | 57.191  |
| 2          | 40.865    | 4618528 | 34516  | 50.821 | 50.821  | 42.809  |
| Total      |           | 9087869 | 80627  |        | 100.000 | 100.000 |

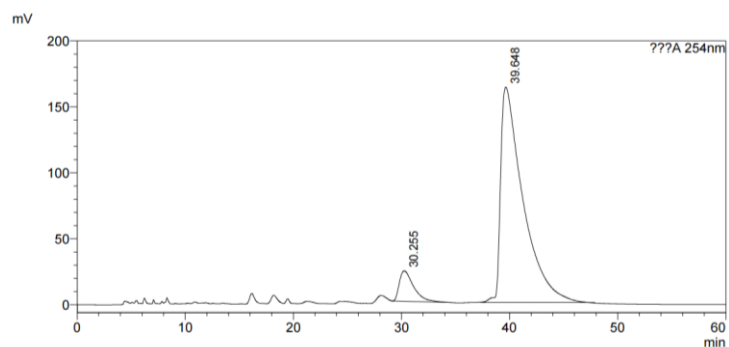

<Peak Table>

| ???A 254nm |           |          |        |        |         |         |
|------------|-----------|----------|--------|--------|---------|---------|
| Peak#      | Ret. Time | Area     | Height | Conc.  | Area%   | Height% |
| 1          | 30.255    | 2136265  | 23090  | 8.320  | 8.320   | 12.383  |
| 2          | 39.648    | 23540791 | 163378 | 91.680 | 91.680  | 87.617  |
| Total      |           | 25677056 | 186468 |        | 100.000 | 100.000 |

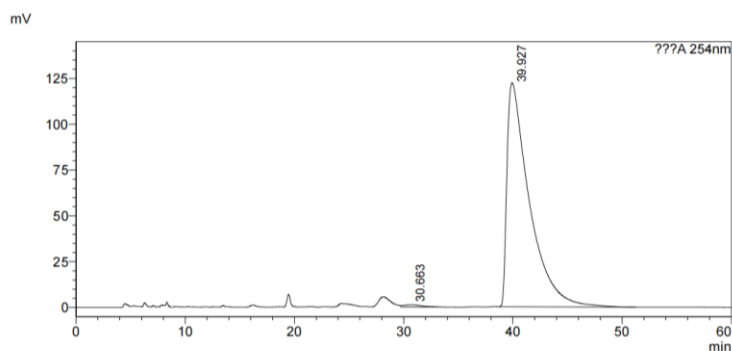

<Peak Table>

| ???A 254nm |           |          |        |        |         |         |
|------------|-----------|----------|--------|--------|---------|---------|
| Peak#      | Ret. Time | Area     | Height | Conc.  | Area%   | Height% |
| 1          | 30.663    | 140356   | 1201   | 0.800  | 0.800   | 0.974   |
| 2          | 39.927    | 17399479 | 122124 | 99.200 | 99.200  | 99.026  |
| Total      |           | 17539834 | 123325 |        | 100.000 | 100.000 |

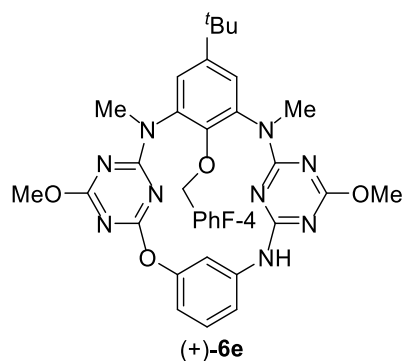

HPLC: IBN5 column, Hexane : *i*-PrOH = 90 : 10, flow rate 1.0 mL/min, 254 nm, 25 °C, 86.9% ee.

# <Chromatogram>

mV

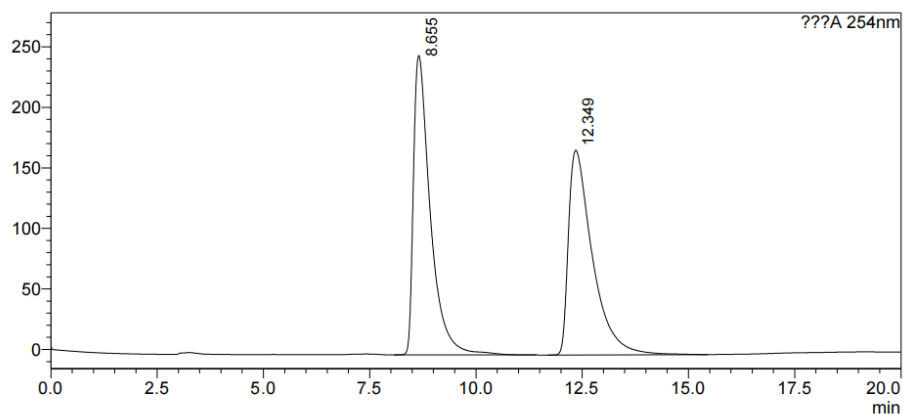

## <Peak Table>

??A 254nm

| Peak# | Ret. Time | Area     | Height | Conc.  | Area%   | Height% |
|-------|-----------|----------|--------|--------|---------|---------|
| 1     | 8.655     | 6848463  | 247368 | 50.787 | 50.787  | 59.394  |
| 2     | 12.349    | 6636226  | 169119 | 49.213 | 49.213  | 40.606  |
| Total |           | 13484689 | 416486 |        | 100.000 | 100.000 |

# <Chromatogram>

mV

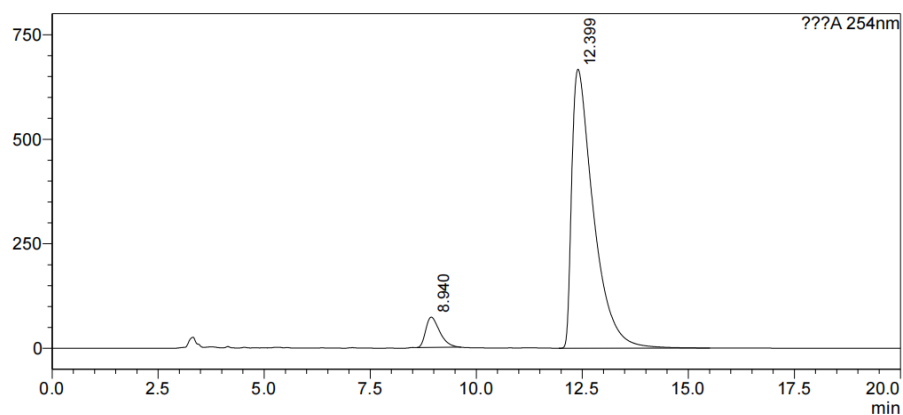

## <Peak Table>

??A 254nm

| Peak# | Ret. Time | Area     | Height | Conc.  | Area%   | Height% |
|-------|-----------|----------|--------|--------|---------|---------|
| 1     | 8.940     | 1658297  | 72426  | 6.532  | 6.532   | 9.795   |
| 2     | 12.399    | 23728215 | 667030 | 93.468 | 93.468  | 90.205  |
| Total |           | 25386513 | 739456 |        | 100.000 | 100.000 |

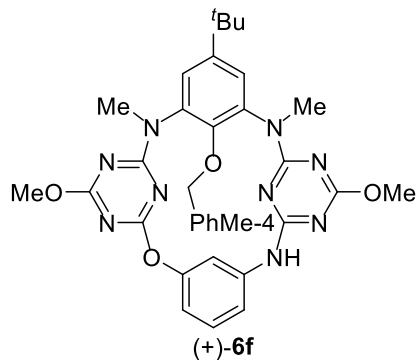

HPLC: IBN5 column, Hexane : *i*-PrOH = 95 : 5, flow rate 1.0 mL/min, 254 nm, 25 °C, 92.3% ee.

# <Chromatogram>

mV

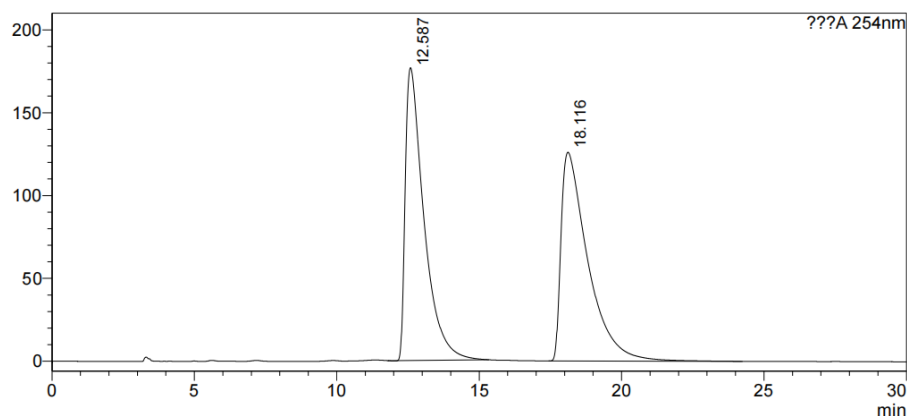

## <Peak Table>

??A 254nm

| Peak# | Ret. Time | Area     | Height | Conc.  | Area%   | Height% |
|-------|-----------|----------|--------|--------|---------|---------|
| 1     | 12.587    | 8070201  | 176607 | 49.386 | 49.386  | 58.369  |
| 2     | 18.116    | 8270971  | 125964 | 50.614 | 50.614  | 41.631  |
| Total |           | 16341173 | 302571 |        | 100.000 | 100.000 |

# <Chromatogram>

mV

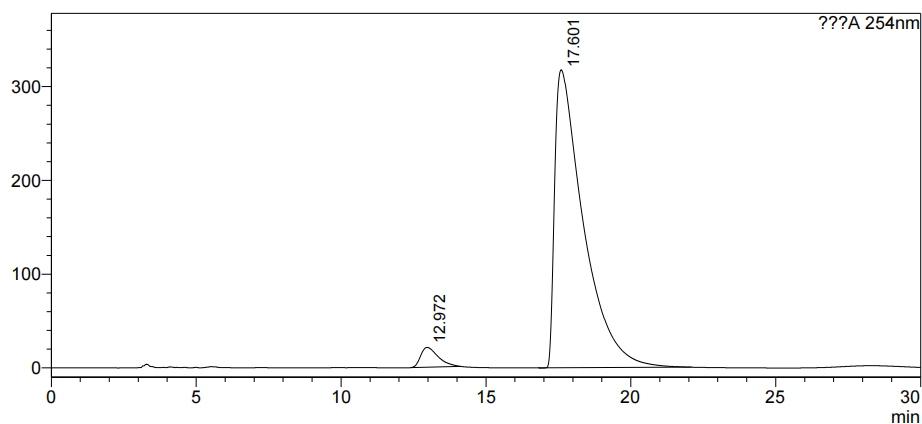

## <Peak Table>

??A 254nm

| Peak# | Ret. Time | Area     | Height | Conc.  | Area%   | Height% |
|-------|-----------|----------|--------|--------|---------|---------|
| 1     | 12.972    | 882509   | 21045  | 3.873  | 3.873   | 6.211   |
| 2     | 17.601    | 21902163 | 317798 | 96.127 | 96.127  | 93.789  |
| Total |           | 22784672 | 338843 |        | 100.000 | 100.000 |

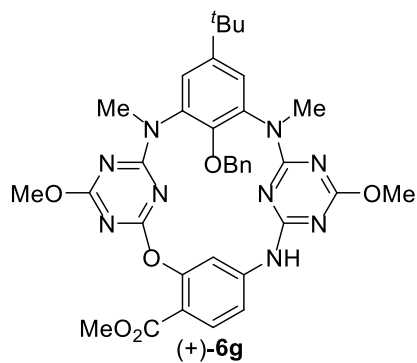

HPLC: IBN5 column, Hexane : *i*-PrOH = 80 : 20, flow rate 0.5 mL/min, 254 nm, 25 °C, 96.8% ee.

# <Chromatogram>

mV

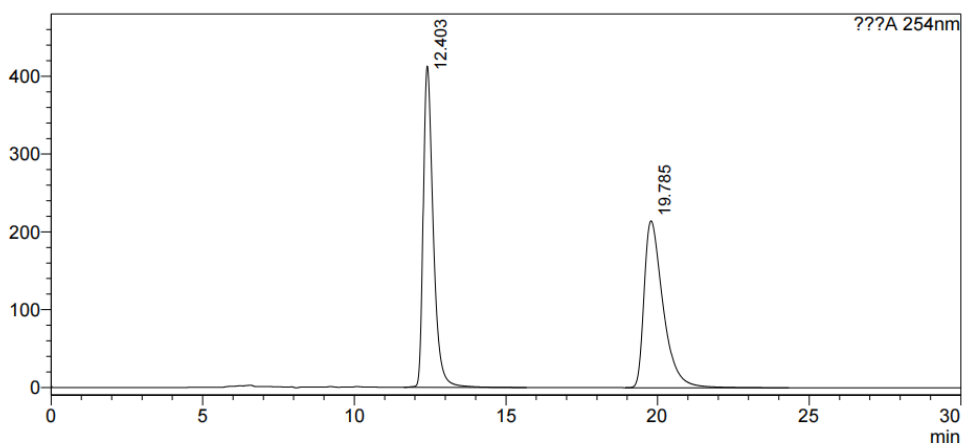

## <Peak Table>

??A 254nm

| Peak# | Ret. Time | Area     | Height | Conc.  | Area%   | Height% |
|-------|-----------|----------|--------|--------|---------|---------|
| 1     | 12.403    | 9432405  | 413258 | 50.193 | 50.193  | 65.830  |
| 2     | 19.785    | 9359960  | 214508 | 49.807 | 49.807  | 34.170  |
| Total |           | 18792365 | 627765 |        | 100.000 | 100.000 |

# <Chromatogram>

mV

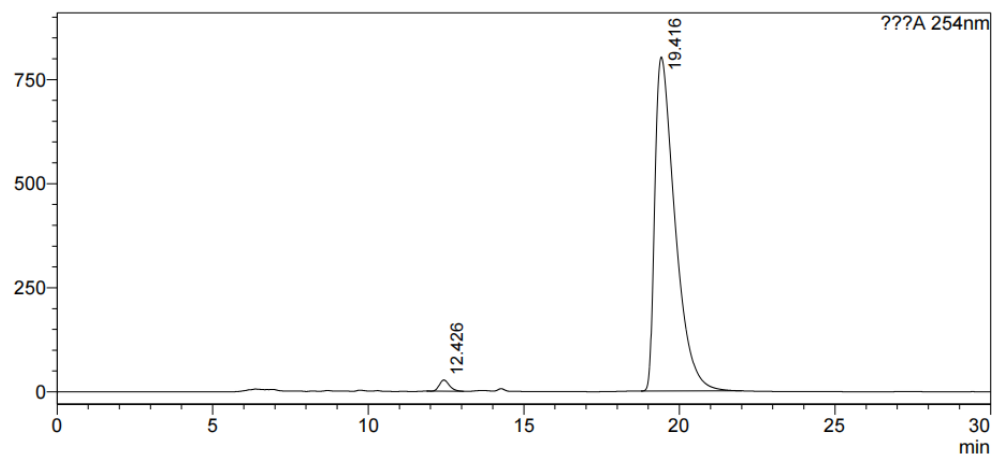

## <Peak Table>

??A 254nm

| Peak# | Ret. Time | Area     | Height | Conc.  | Area%   | Height% |
|-------|-----------|----------|--------|--------|---------|---------|
| 1     | 12.426    | 586773   | 26682  | 1.589  | 1.589   | 3.221   |
| 2     | 19.416    | 36345351 | 801812 | 98.411 | 98.411  | 96.779  |
| Total |           | 36932124 | 828494 |        | 100.000 | 100.000 |

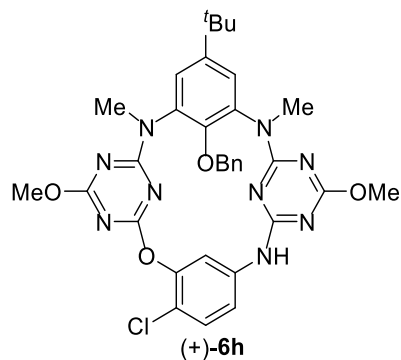

HPLC: IBN5 column, Hexane : *i*-PrOH = 90 : 10, flow rate 1.0 mL/min, 254 nm, 25 °C, 94.5% ee.

# <Chromatogram>

mV

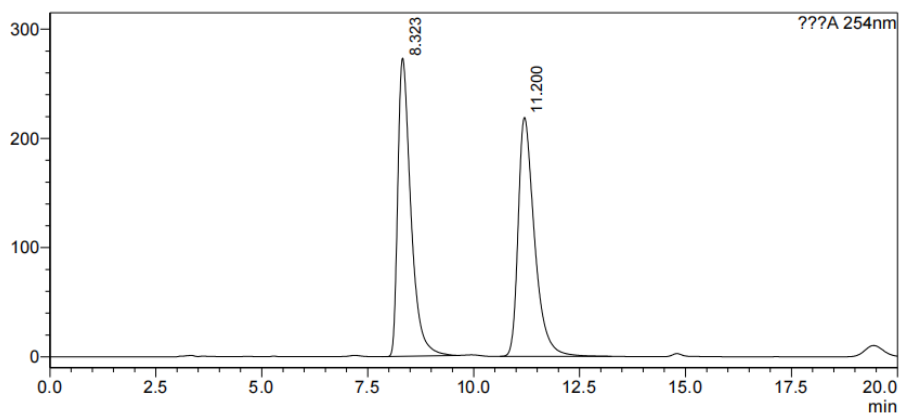

## <Peak Table>

??A 254nm

| Peak# | Ret. Time | Area     | Height | Conc.  | Area%   | Height% |
|-------|-----------|----------|--------|--------|---------|---------|
| 1     | 8.323     | 5866043  | 273120 | 49.874 | 49.874  | 55.513  |
| 2     | 11.200    | 5895599  | 218877 | 50.126 | 50.126  | 44.487  |
| Total |           | 11761642 | 491997 |        | 100.000 | 100.000 |

mV

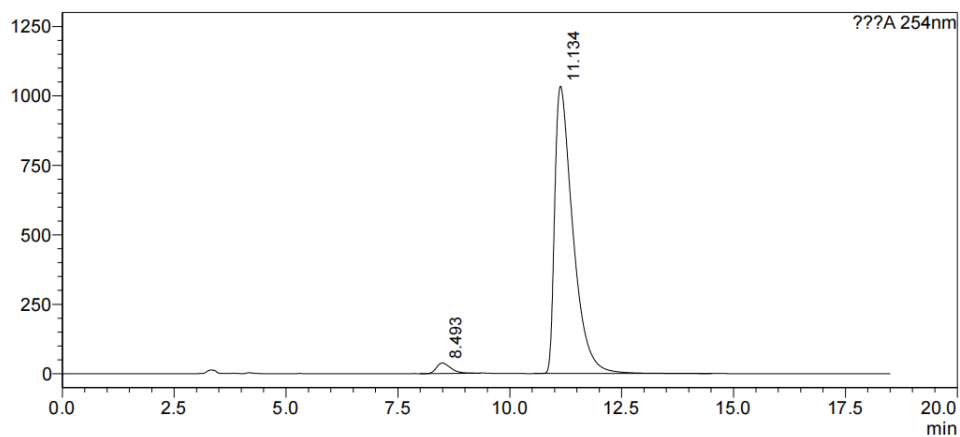

## <Peak Table>

??A 254nm

| Peak# | Ret. Time | Area     | Height  | Conc.  | Area%   | Height% |
|-------|-----------|----------|---------|--------|---------|---------|
| 1     | 8.493     | 826179   | 37486   | 2.742  | 2.742   | 3.498   |
| 2     | 11.134    | 29306221 | 1034214 | 97.258 | 97.258  | 96.502  |
| Total |           | 30132400 | 1071700 |        | 100.000 | 100.000 |

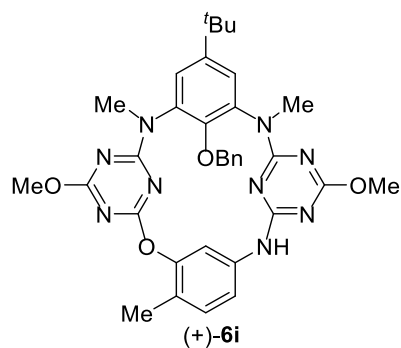

HPLC: IBN5 column, Hexane : *i*-PrOH = 95 : 5, flow rate 0.5 mL/min, 254 nm, 25 °C, 94.9% ee.

### <Chromatogram>

mV

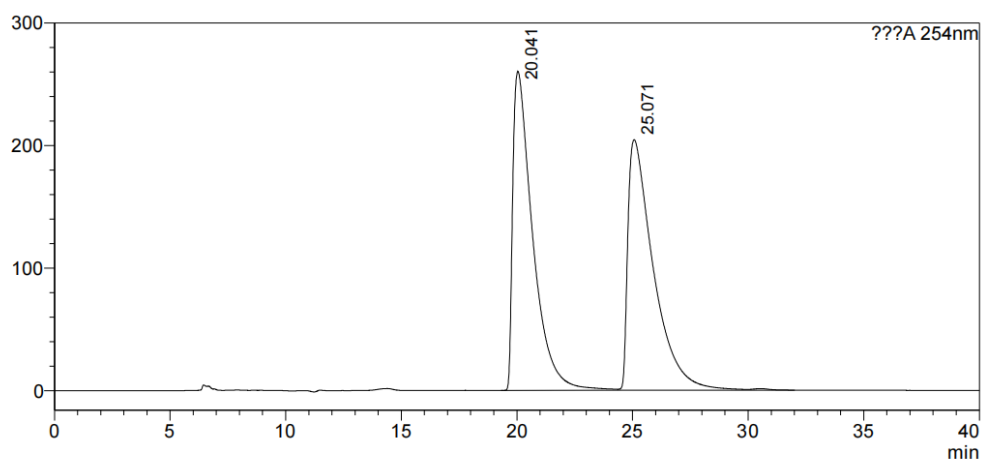

### <Peak Table>

??A 254nm

| Peak# | Ret. Time | Area     | Height | Area%   | Height% |
|-------|-----------|----------|--------|---------|---------|
| 1     | 20.041    | 15631203 | 260501 | 49.775  | 56.011  |
| 2     | 25.071    | 15772829 | 204588 | 50.225  | 43.989  |
| Total |           | 31404032 | 465089 | 100.000 | 100.000 |

### <Chromatogram>

mV

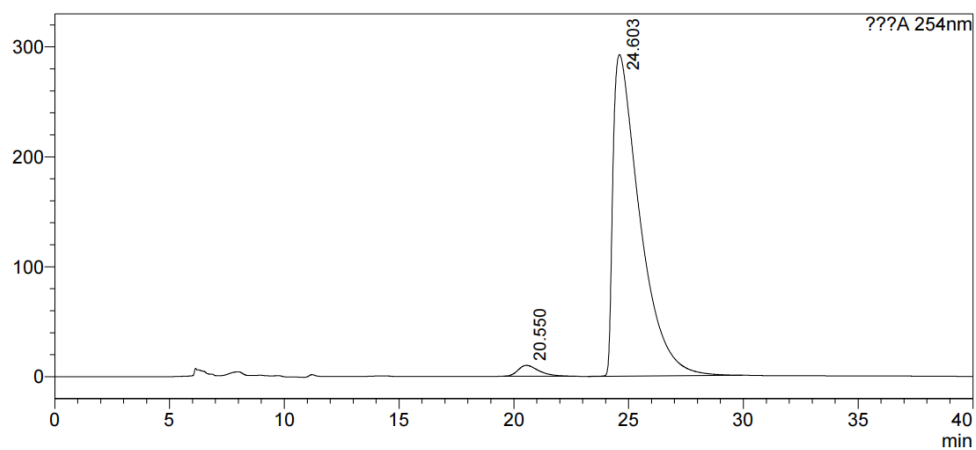

### <Peak Table>

??A 254nm

| Peak# | Ret. Time | Area     | Height | Area%   | Height% |
|-------|-----------|----------|--------|---------|---------|
| 1     | 20.550    | 628675   | 9883   | 2.574   | 3.268   |
| 2     | 24.603    | 23795736 | 292552 | 97.426  | 96.732  |
| Total |           | 24424411 | 302435 | 100.000 | 100.000 |

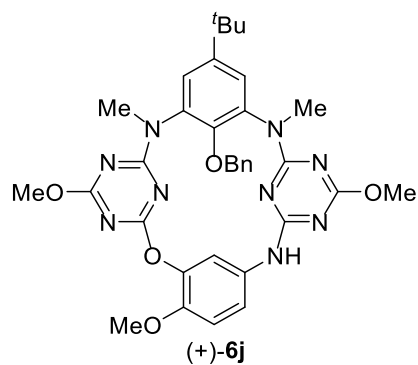

HPLC: IBN5 column, Hexane : *i*-PrOH = 90 : 10, flow rate 1.0 mL/min, 254 nm, 25 °C, 87.7% ee.

### <Chromatogram>

mV

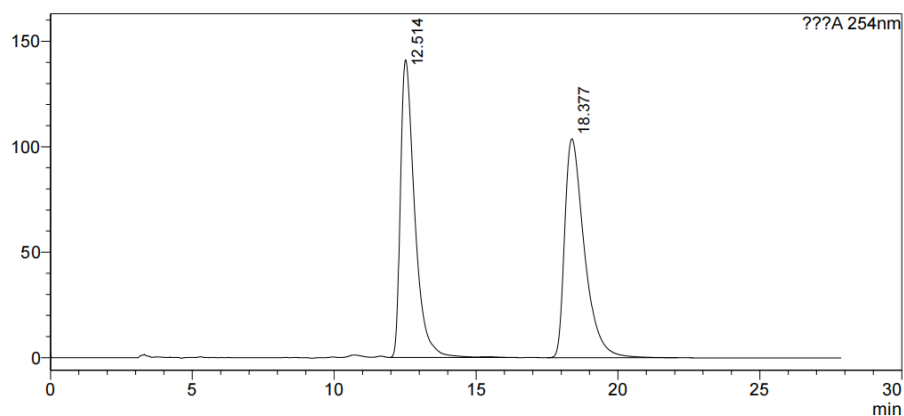

### <Peak Table>

??A 254nm

| Peak# | Ret. Time | Area    | Height | Conc.  | Area%   | Height% |
|-------|-----------|---------|--------|--------|---------|---------|
| 1     | 12.514    | 4942848 | 141155 | 49.540 | 49.540  | 57.623  |
| 2     | 18.377    | 5034617 | 103810 | 50.460 | 50.460  | 42.377  |
| Total |           | 9977465 | 244964 |        | 100.000 | 100.000 |

### <Chromatogram>

mV

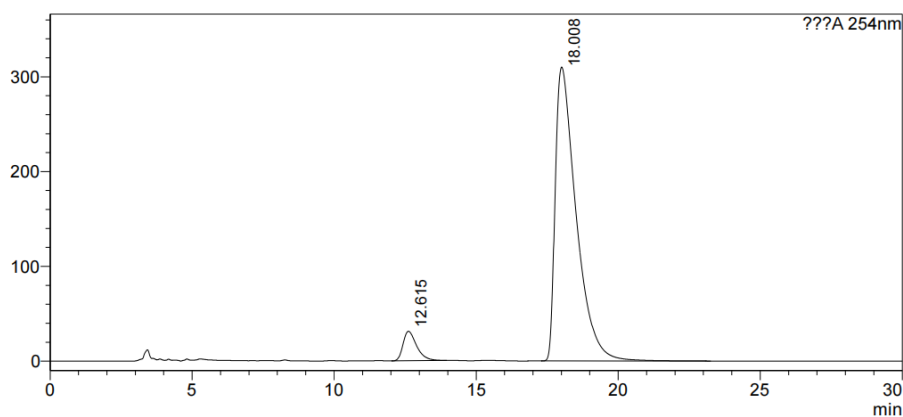

### <Peak Table>

??A 254nm

| Peak# | Ret. Time | Area     | Height | Conc.  | Area%   | Height% |
|-------|-----------|----------|--------|--------|---------|---------|
| 1     | 12.615    | 1042057  | 31175  | 6.160  | 6.160   | 9.137   |
| 2     | 18.008    | 15873670 | 310033 | 93.840 | 93.840  | 90.863  |
| Total |           | 16915727 | 341208 |        | 100.000 | 100.000 |

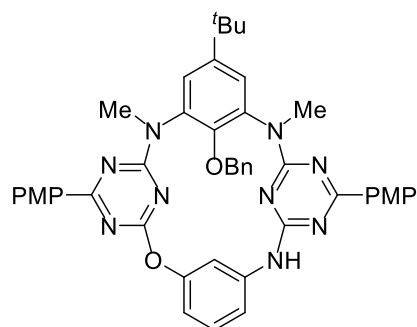

(+)-**6k**: PMP = 4-MeOC<sub>6</sub>H<sub>4</sub>

HPLC: IA column, Hexane : *i*-PrOH = 94 : 6, flow rate 1.0 mL/min, 254 nm, 25 °C, 48.9% ee.

<Chromatogram>

mV

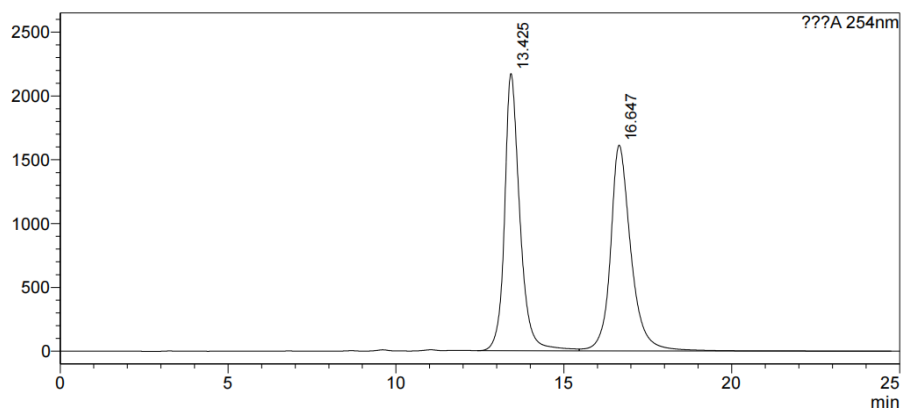

<Peak Table>

??A 254nm

| Peak# | Ret. Time | Area      | Height  | Conc.  | Area%   | Height% |
|-------|-----------|-----------|---------|--------|---------|---------|
| 1     | 13.425    | 68995960  | 2171826 | 50.209 | 50.209  | 57.391  |
| 2     | 16.647    | 68422291  | 1612441 | 49.791 | 49.791  | 42.609  |
| Total |           | 137418251 | 3784268 |        | 100.000 | 100.000 |

<Chromatogram>

mV

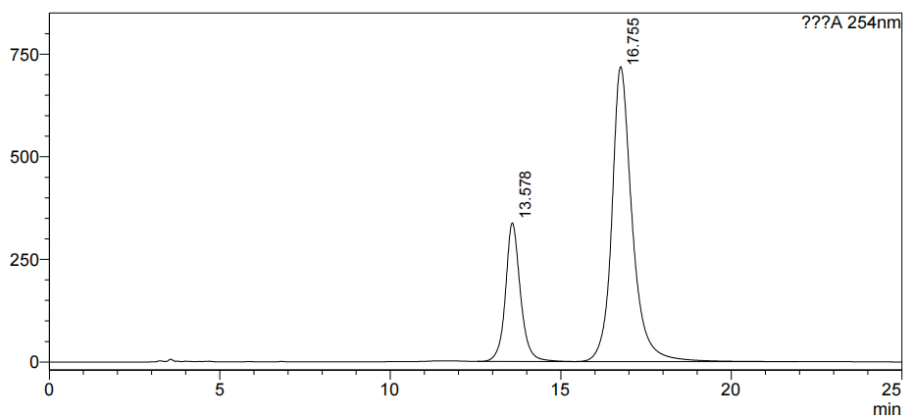

<Peak Table>

??A 254nm

| Peak# | Ret. Time | Area     | Height  | Conc.  | Area%   | Height% |
|-------|-----------|----------|---------|--------|---------|---------|
| 1     | 13.578    | 10284990 | 337793  | 25.564 | 25.564  | 31.974  |
| 2     | 16.755    | 29946970 | 718654  | 74.436 | 74.436  | 68.026  |
| Total |           | 40231960 | 1056447 |        | 100.000 | 100.000 |

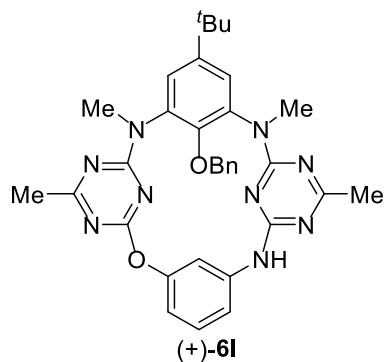

HPLC: IBN5 column, Hexane : *i*-PrOH = 92 : 8, flow rate 1.0 mL/min, 254 nm, 25 °C, 87.2% ee.

<Chromatogram>

mV

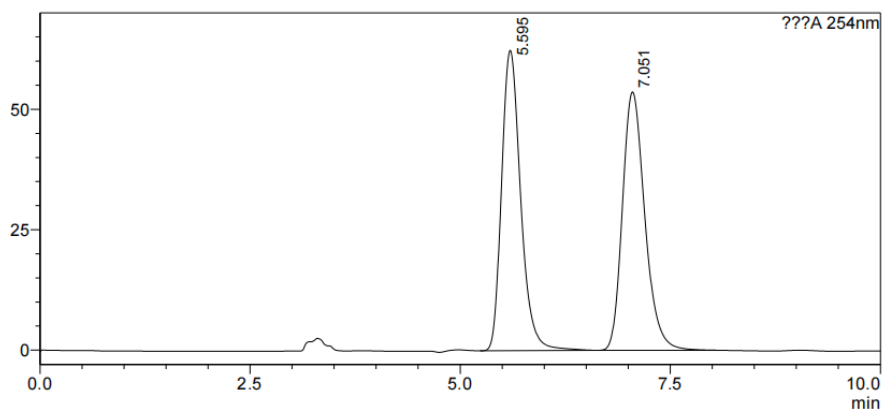

<Peak Table>

???A 254nm

| Peak# | Ret. Time | Area    | Height | Conc.  | Area%   | Height% |
|-------|-----------|---------|--------|--------|---------|---------|
| 1     | 5.595     | 986770  | 62323  | 49.708 | 49.708  | 53.738  |
| 2     | 7.051     | 998344  | 53652  | 50.292 | 50.292  | 46.262  |
| Total |           | 1985114 | 115975 |        | 100.000 | 100.000 |

<Chromatogram>

mV

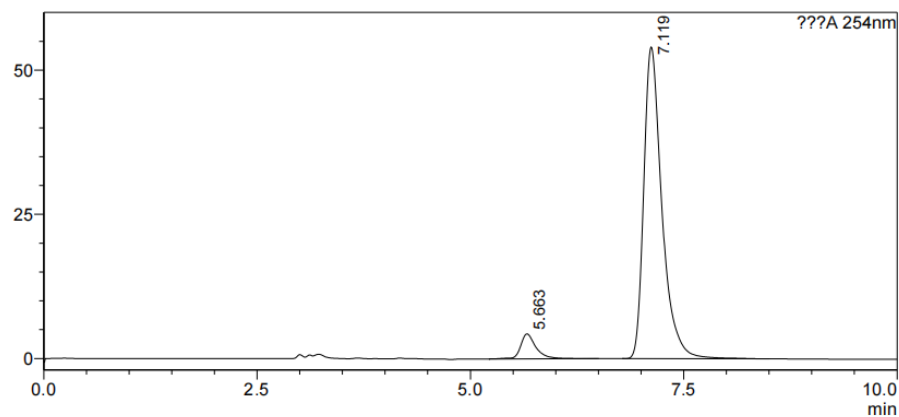

<Peak Table>

???A 254nm

| Peak# | Ret. Time | Area   | Height | Conc.  | Area%   | Height% |
|-------|-----------|--------|--------|--------|---------|---------|
| 1     | 5.663     | 54963  | 4323   | 6.409  | 6.409   | 7.405   |
| 2     | 7.119     | 802590 | 54050  | 93.591 | 93.591  | 92.595  |
| Total |           | 857553 | 58373  |        | 100.000 | 100.000 |

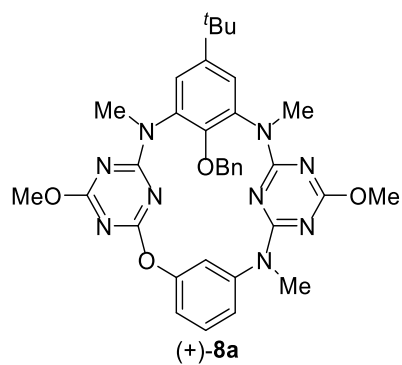

HPLC: IBN5 column, Hexane : i-PrOH = 95 : 5, flow rate 0.8 mL/min, 25 °C, 254 nm, 92% ee.

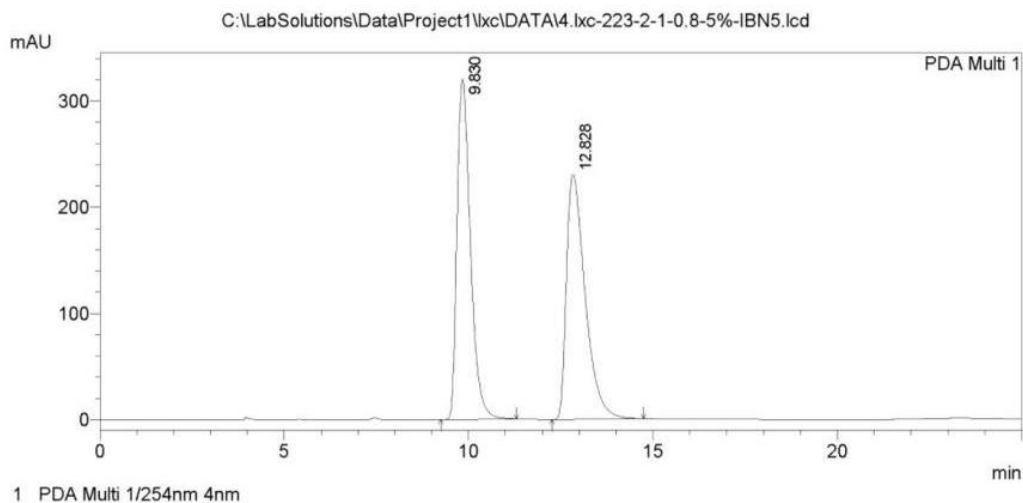

PeakTable

| Peak# | Ret. Time | Area     | Height | Area %  | Height % |
|-------|-----------|----------|--------|---------|----------|
| 1     | 9.830     | 8090858  | 319969 | 49.911  | 58.130   |
| 2     | 12.828    | 8119605  | 230464 | 50.089  | 41.870   |
| Total |           | 16210463 | 550433 | 100.000 | 100.000  |

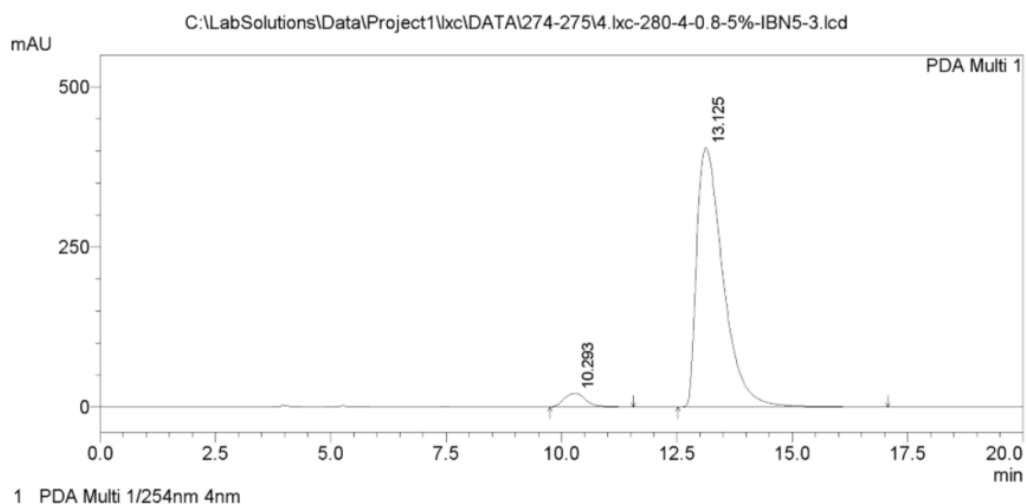

PeakTable

| Peak# | Ret. Time | Area     | Height | Area %  | Height % |
|-------|-----------|----------|--------|---------|----------|
| 1     | 10.293    | 676973   | 21172  | 4.024   | 4.963    |
| 2     | 13.125    | 16144744 | 405405 | 95.976  | 95.037   |
| Total |           | 16821716 | 426577 | 100.000 | 100.000  |

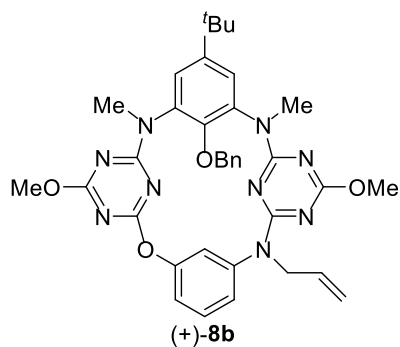

HPLC: IBN5 column, Hexane : *i*-PrOH = 95 : 5, flow rate 0.5 mL/min, 254 nm, 25 °C, 92% ee.

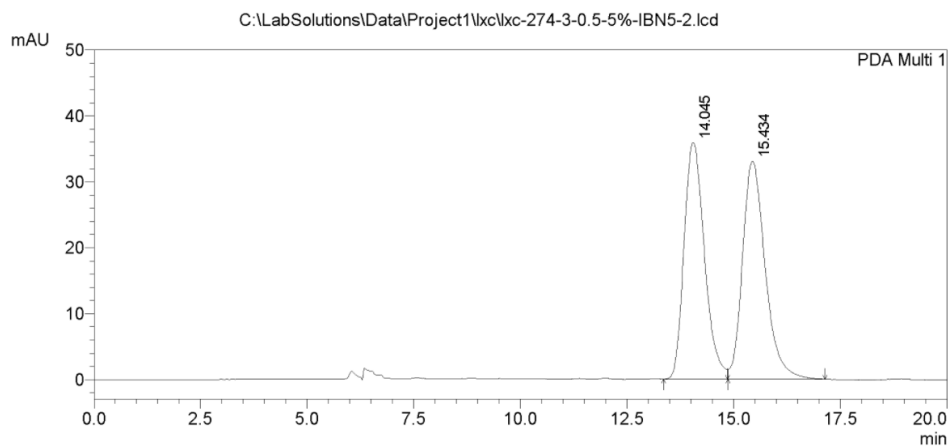

1 PDA Multi 1/254nm 4nm

PeakTable

PDA Ch1 254nm 4nm

| Peak# | Ret. Time | Area    | Height | Area %  | Height % |
|-------|-----------|---------|--------|---------|----------|
| 1     | 14.045    | 1199761 | 35956  | 49.364  | 52.068   |
| 2     | 15.434    | 1230687 | 33101  | 50.636  | 47.932   |
| Total |           | 2430448 | 69057  | 100.000 | 100.000  |

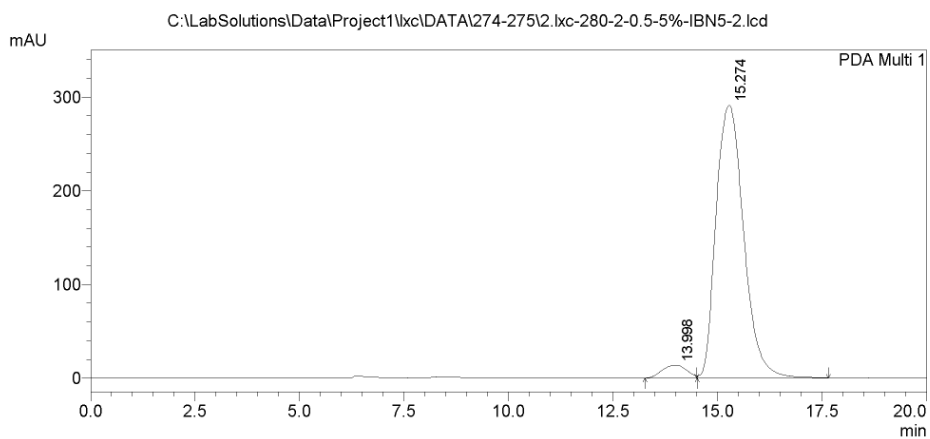

1 PDA Multi 1/254nm 4nm

PeakTable

PDA Ch1 254nm 4nm

| Peak# | Ret. Time | Area     | Height | Area %  | Height % |
|-------|-----------|----------|--------|---------|----------|
| 1     | 13.998    | 557019   | 13735  | 3.985   | 4.504    |
| 2     | 15.274    | 13420118 | 291183 | 96.015  | 95.496   |
| Total |           | 13977137 | 304917 | 100.000 | 100.000  |

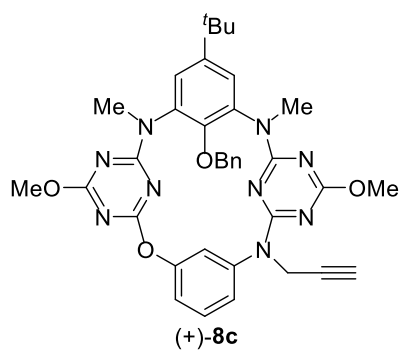

HPLC: IBN5 column, Hexane : *i*-PrOH = 95 : 5, flow rate 0.8 mL/min, 25 °C, 254 nm, 94.1% ee.

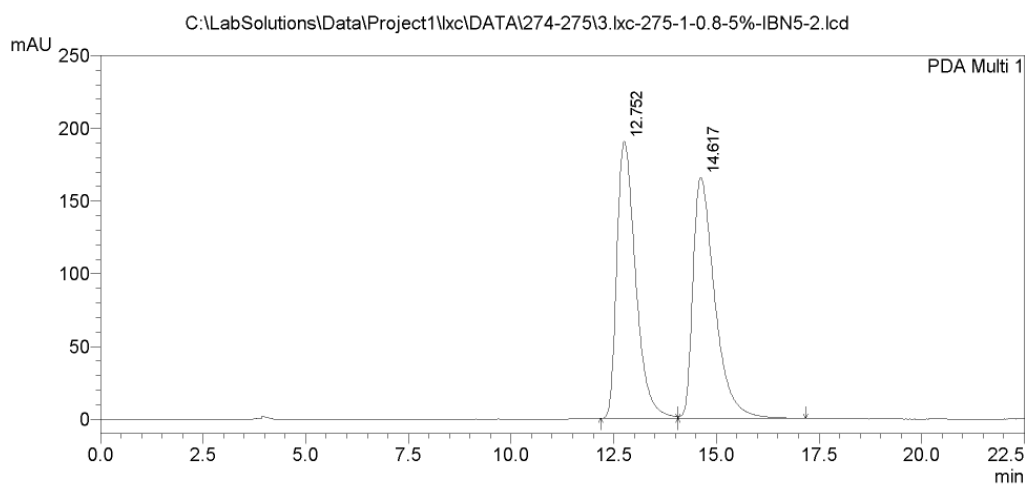

PeakTable

PDA Ch1 254nm 4nm

| Peak# | Ret. Time | Area     | Height | Area %  | Height % |
|-------|-----------|----------|--------|---------|----------|
| 1     | 12.752    | 6045929  | 190612 | 49.615  | 53.495   |
| 2     | 14.617    | 6139641  | 165708 | 50.385  | 46.505   |
| Total |           | 12185570 | 356320 | 100.000 | 100.000  |

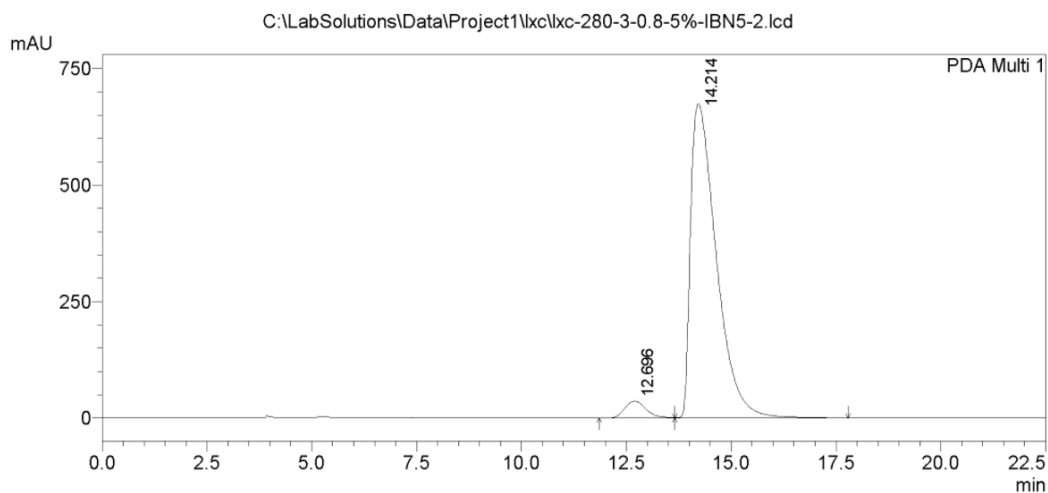

PeakTable

PDA Ch1 254nm 4nm

| Peak# | Ret. Time | Area     | Height | Area %  | Height % |
|-------|-----------|----------|--------|---------|----------|
| 1     | 12.696    | 1297097  | 36556  | 4.294   | 5.137    |
| 2     | 14.214    | 28908931 | 675065 | 95.706  | 94.863   |
| Total |           | 30206028 | 711621 | 100.000 | 100.000  |

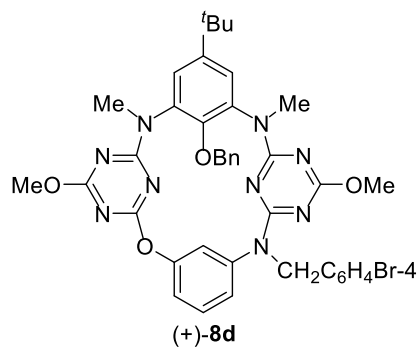

HPLC: IBN5 column, Hexane : *i*-PrOH = 94 : 6, flow rate 0.3 mL/min, 254 nm, 25 °C, 90.4% ee.

### <Chromatogram>

mV

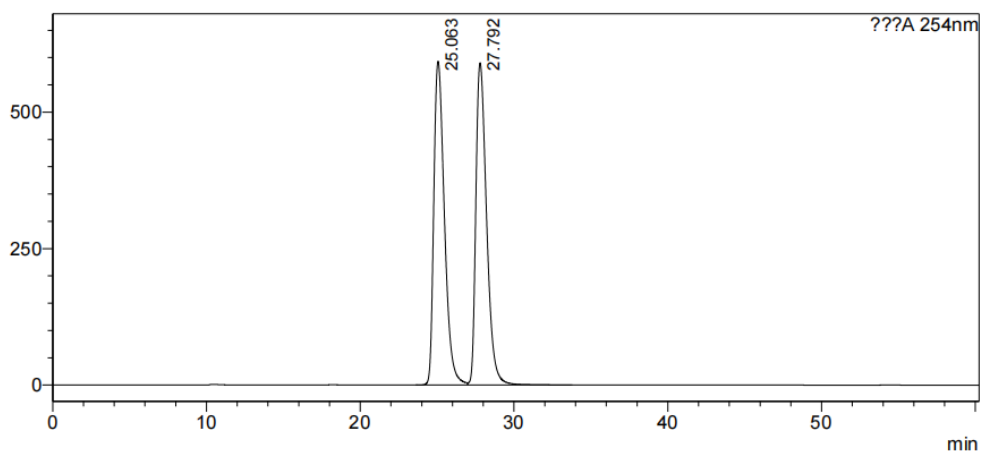

### <Peak Table>

???A 254nm

| Peak# | Ret. Time | Area     | Height  | Conc.  | Area%   | Height% |
|-------|-----------|----------|---------|--------|---------|---------|
| 1     | 25.063    | 28544349 | 593173  | 49.869 | 49.869  | 50.127  |
| 2     | 27.792    | 28694708 | 590161  | 50.131 | 50.131  | 49.873  |
| Total |           | 57239057 | 1183333 |        | 100.000 | 100.000 |

### <Chromatogram>

mV

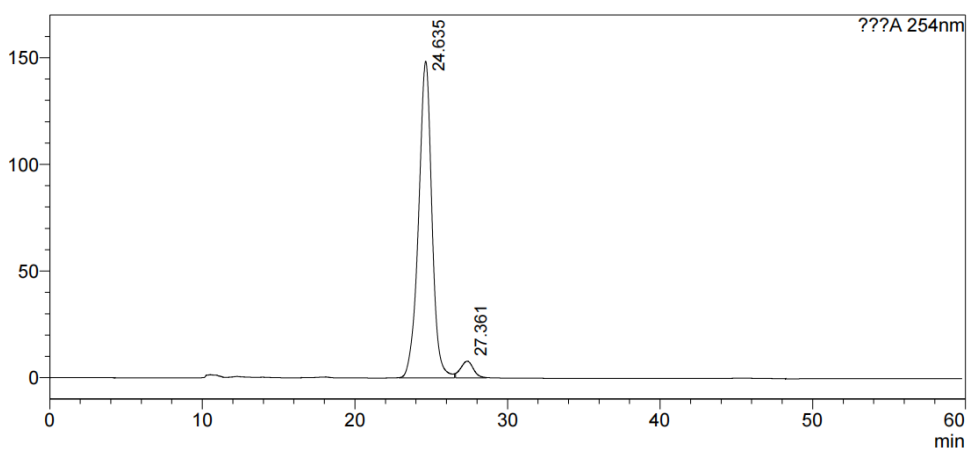

### <Peak Table>

???A 254nm

| Peak# | Ret. Time | Area    | Height | Conc.  | Area%   | Height% |
|-------|-----------|---------|--------|--------|---------|---------|
| 1     | 24.635    | 8966530 | 148450 | 95.183 | 95.183  | 95.002  |
| 2     | 27.361    | 453812  | 7810   | 4.817  | 4.817   | 4.998   |
| Total |           | 9420342 | 156260 |        | 100.000 | 100.000 |

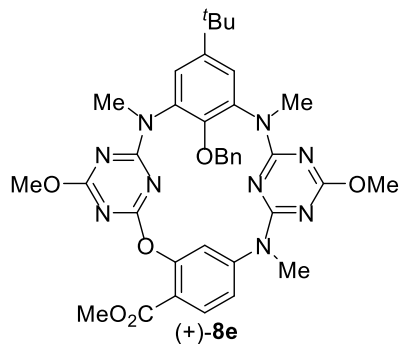

HPLC: IBN5 column, Hexane : *i*-PrOH = 80 : 20, flow rate 0.5 mL/min, 254 nm, 25 °C, 96.1% ee.

### <Chromatogram>

mV

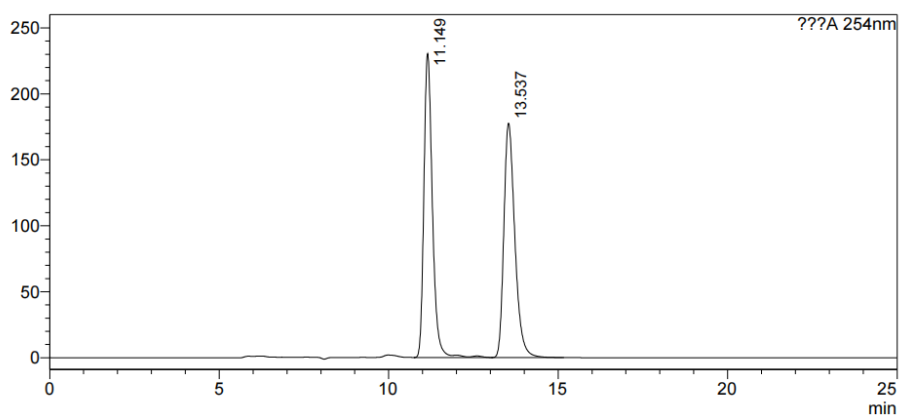

### <Peak Table>

??A 254nm

| Peak# | Ret. Time | Area    | Height | Conc.  | Area%   | Height% |
|-------|-----------|---------|--------|--------|---------|---------|
| 1     | 11.149    | 4041970 | 230232 | 50.233 | 50.233  | 56.450  |
| 2     | 13.537    | 4004515 | 177622 | 49.767 | 49.767  | 43.550  |
| Total |           | 8046485 | 407854 |        | 100.000 | 100.000 |

### <Chromatogram>

mV

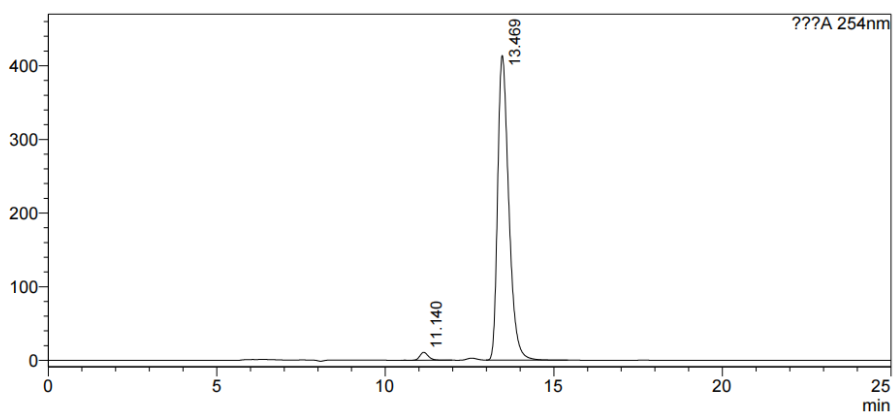

### <Peak Table>

??A 254nm

| Peak# | Ret. Time | Area    | Height | Conc.  | Area%   | Height% |
|-------|-----------|---------|--------|--------|---------|---------|
| 1     | 11.140    | 186777  | 10667  | 1.929  | 1.929   | 2.513   |
| 2     | 13.469    | 9498246 | 413756 | 98.071 | 98.071  | 97.487  |
| Total |           | 9685023 | 424423 |        | 100.000 | 100.000 |

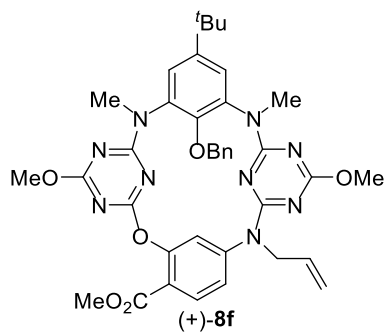

HPLC: IBN5 column, Hexane: *i*-PrOH = 97 : 3, flow rate 0.3 mL/min, 254 nm, 25 °C, 96.7% ee.

# <Chromatogram>

mV

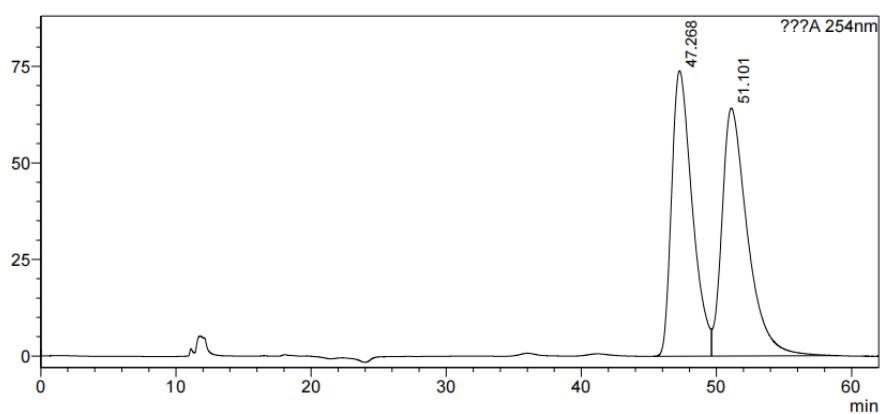

## <Peak Table>

???A 254nm

| Peak# | Ret. Time | Area     | Height | Conc.  | Area%   | Height% |
|-------|-----------|----------|--------|--------|---------|---------|
| 1     | 47.268    | 7848929  | 73936  | 48.209 | 48.209  | 53.539  |
| 2     | 51.101    | 8431996  | 64161  | 51.791 | 51.791  | 46.461  |
| Total |           | 16280925 | 138097 |        | 100.000 | 100.000 |

# <Chromatogram>

mV

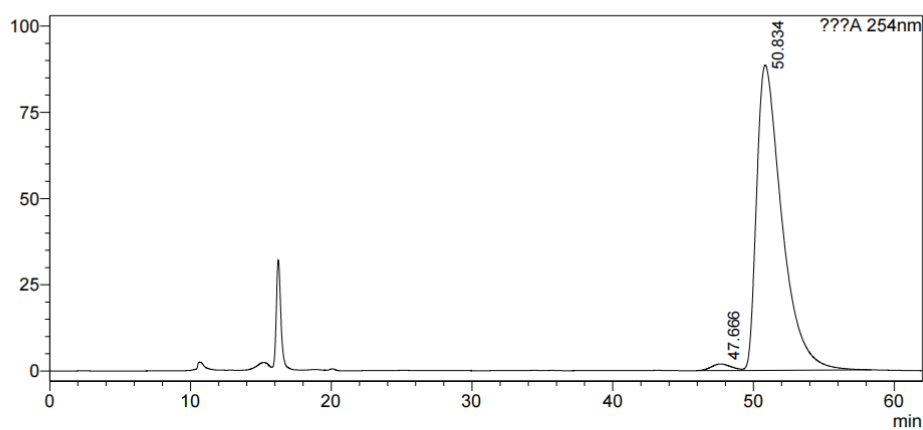

## <Peak Table>

???A 254nm

| Peak# | Ret. Time | Area     | Height | Conc.  | Area%   | Height% |
|-------|-----------|----------|--------|--------|---------|---------|
| 1     | 47.666    | 187565   | 1919   | 1.671  | 1.671   | 2.122   |
| 2     | 50.834    | 11038407 | 88509  | 98.329 | 98.329  | 97.878  |
| Total |           | 11225972 | 90429  |        | 100.000 | 100.000 |

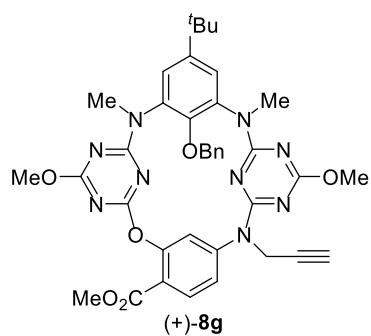

HPLC: IBN5 column, Hexane : *i*-PrOH = 80 : 20, flow rate 0.5 mL/min, 254 nm, 25 °C, 94.9% ee.

# <Chromatogram>

mV

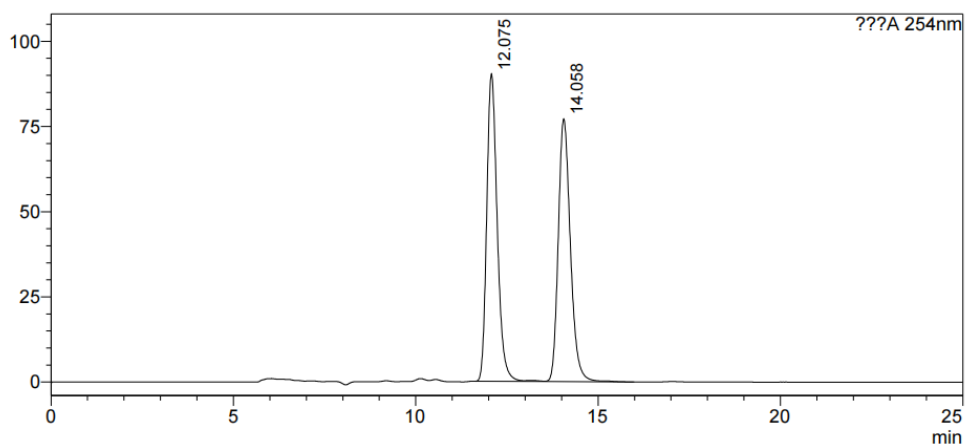

## <Peak Table>

??A 254nm

| Peak# | Ret. Time | Area    | Height | Conc.  | Area%   | Height% |
|-------|-----------|---------|--------|--------|---------|---------|
| 1     | 12.075    | 1804438 | 90243  | 50.273 | 50.273  | 53.932  |
| 2     | 14.058    | 1784813 | 77085  | 49.727 | 49.727  | 46.068  |
| Total |           | 3589251 | 167327 |        | 100.000 | 100.000 |

# <Chromatogram>

mV

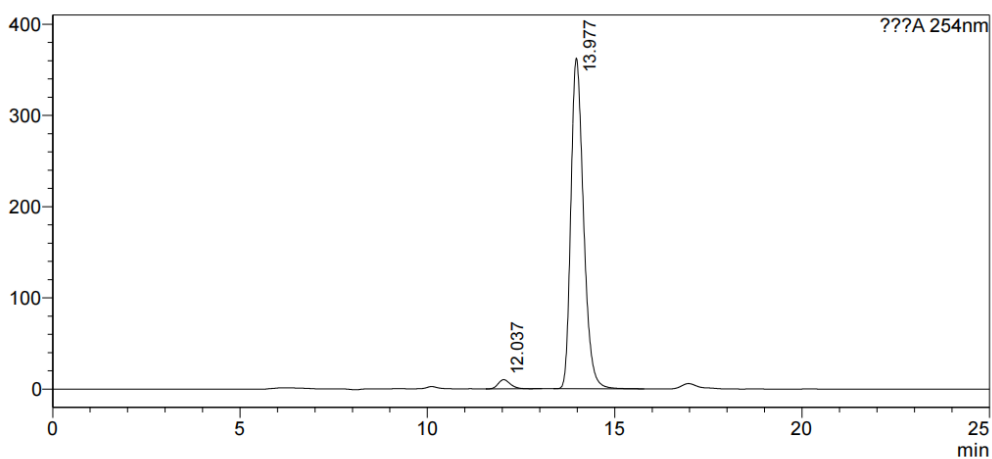

## <Peak Table>

??A 254nm

| Peak# | Ret. Time | Area    | Height | Conc.  | Area%   | Height% |
|-------|-----------|---------|--------|--------|---------|---------|
| 1     | 12.037    | 224716  | 10021  | 2.575  | 2.575   | 2.692   |
| 2     | 13.977    | 8501223 | 362202 | 97.425 | 97.425  | 97.308  |
| Total |           | 8725939 | 372223 |        | 100.000 | 100.000 |

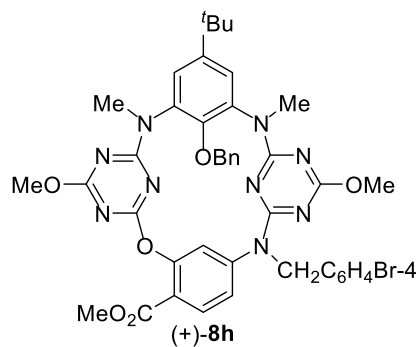

HPLC: IBN5 column, Hexane : *i*-PrOH = 80 : 20, flow rate 0.5 mL/min, 254 nm, 25 °C, 96.2% ee.

### <Chromatogram>

mV

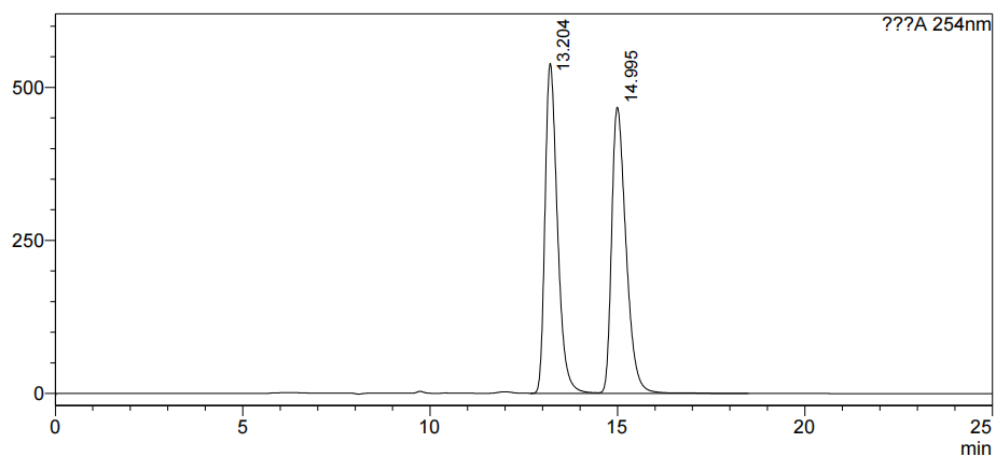

### <Peak Table>

??A 254nm

| Peak# | Ret. Time | Area     | Height  | Conc.  | Area%   | Height% |
|-------|-----------|----------|---------|--------|---------|---------|
| 1     | 13.204    | 12426750 | 538893  | 49.811 | 49.811  | 53.550  |
| 2     | 14.995    | 12521053 | 467437  | 50.189 | 50.189  | 46.450  |
| Total |           | 24947803 | 1006330 |        | 100.000 | 100.000 |

### <Chromatogram>

mV

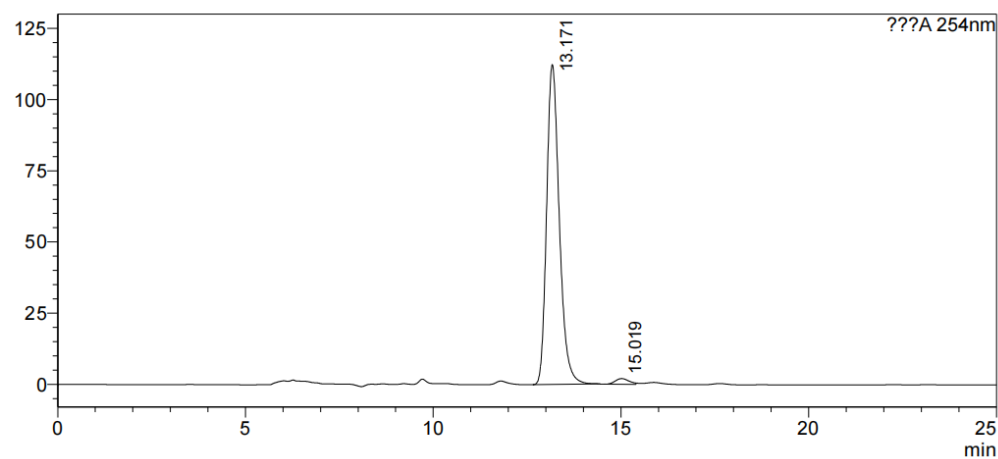

### <Peak Table>

??A 254nm

| Peak# | Ret. Time | Area    | Height | Conc.  | Area%   | Height% |
|-------|-----------|---------|--------|--------|---------|---------|
| 1     | 13.171    | 2637208 | 112357 | 98.099 | 98.099  | 98.242  |
| 2     | 15.019    | 51108   | 2011   | 1.901  | 1.901   | 1.758   |
| Total |           | 2688316 | 114368 |        | 100.000 | 100.000 |

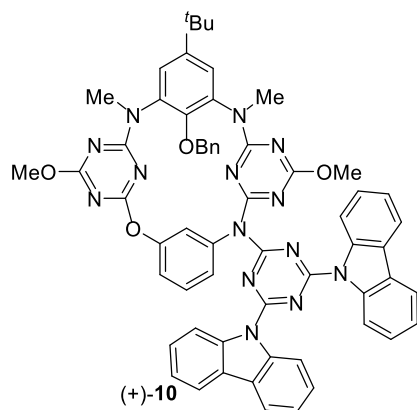

HPLC: IBN5 column, Hexane : *i*-PrOH : CH<sub>2</sub>Cl<sub>2</sub> = 80 : 5 : 15, flow rate 0.5 mL/min, 254 nm, 25 °C, 89.9% ee.

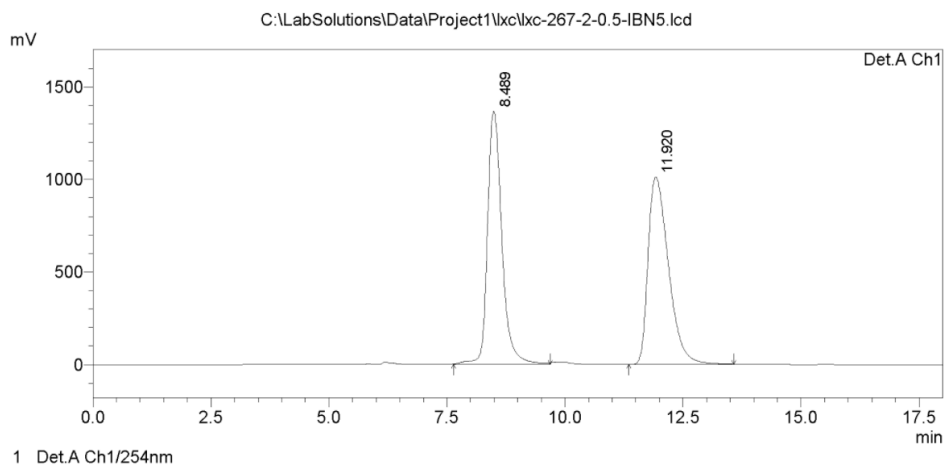

检测器 A Ch1 254nm

| Peak# | Ret. Time | Area     | Height  | Area %  | Height % |
|-------|-----------|----------|---------|---------|----------|
| 1     | 8.489     | 28932135 | 1366782 | 48.819  | 57.460   |
| 2     | 11.920    | 30331878 | 1011890 | 51.181  | 42.540   |
| Total |           | 59264013 | 2378672 | 100.000 | 100.000  |

PeakTable

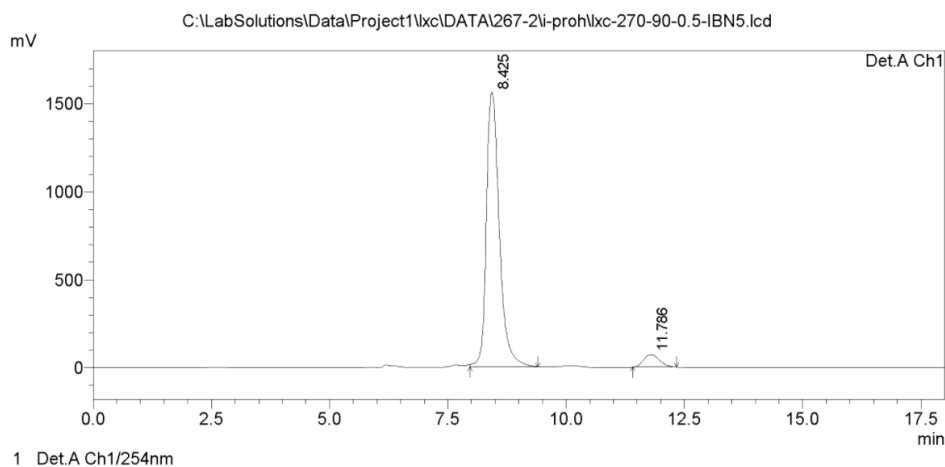

检测器 A Ch1 254nm

| Peak# | Ret. Time | Area     | Height  | Area %  | Height % |
|-------|-----------|----------|---------|---------|----------|
| 1     | 8.425     | 29748768 | 1560192 | 94.971  | 95.738   |
| 2     | 11.786    | 1575167  | 69459   | 5.029   | 4.262    |
| Total |           | 31323935 | 1629651 | 100.000 | 100.000  |

PeakTable

**12. Copies of CD spectra of compounds 6a-6l, 8a-8h and 10.**

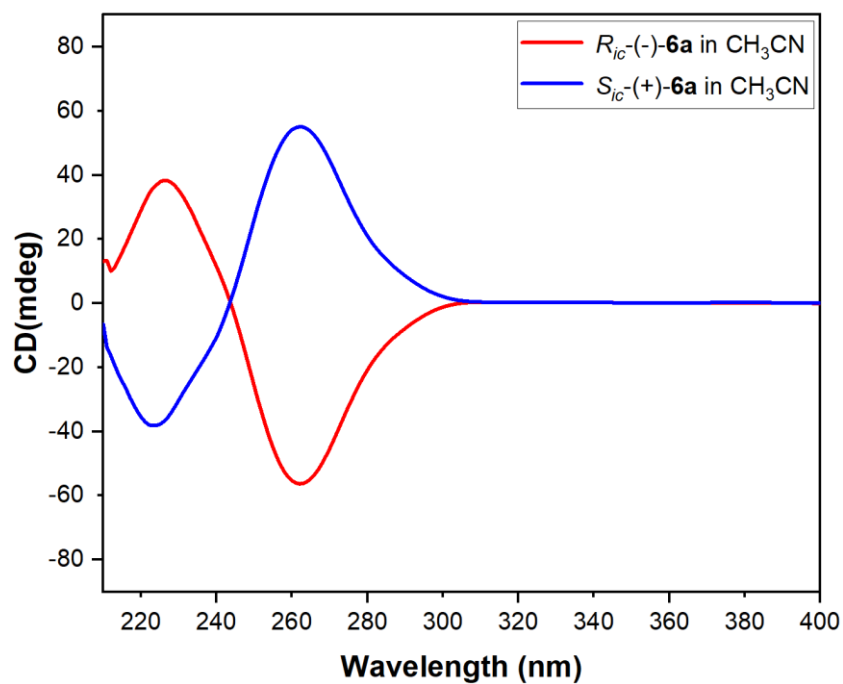

**Figure S7.** CD spectrum of  $R_{ic}(-)\text{-6a}$  and  $S_{ic}(+)\text{-6a}$  in  $\text{CH}_3\text{CN}$  ( $5.00 \times 10^{-5}$  M) at 25 °C.

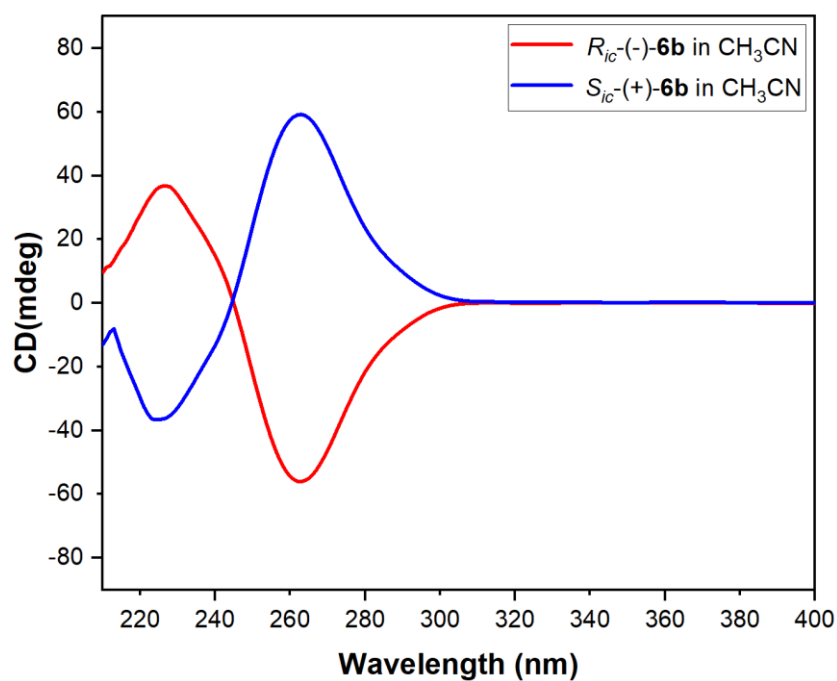

**Figure S8.** CD spectrum of  $R_{ic}(-)\text{-6b}$  and  $S_{ic}(+)\text{-6b}$  in  $\text{CH}_3\text{CN}$  ( $5.00 \times 10^{-5}$  M) at 25 °C.

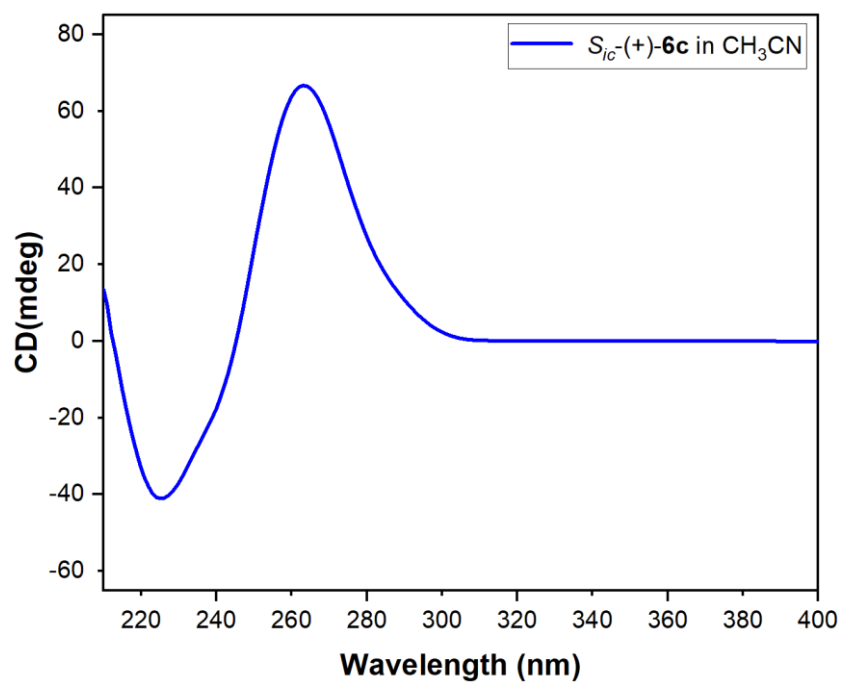

**Figure S9.** CD spectrum of  $S_{ic}-(+)-6c$  in  $CH_3CN$  ( $5.25 \times 10^{-5}$  M) at 25 °C.

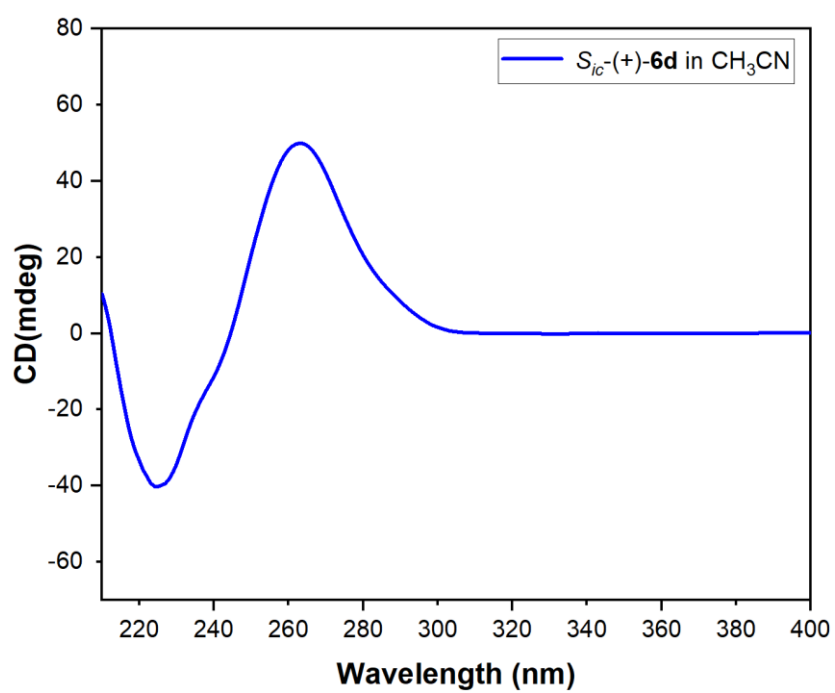

**Figure S10.** CD spectrum of  $S_{ic}-(+)-6d$  in  $CH_3CN$  ( $5.00 \times 10^{-5}$  M) at 25 °C.

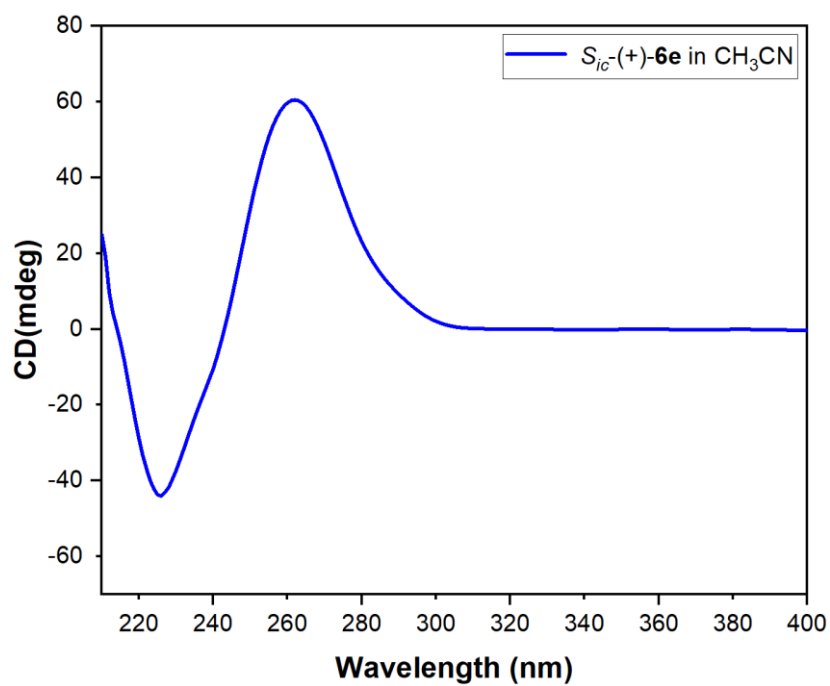

**Figure S11.** CD spectrum of  $S_{ic}-(+)-6e$  in  $CH_3CN$  (5.00 $\times 10^{-5}$  M) at 25 °C.

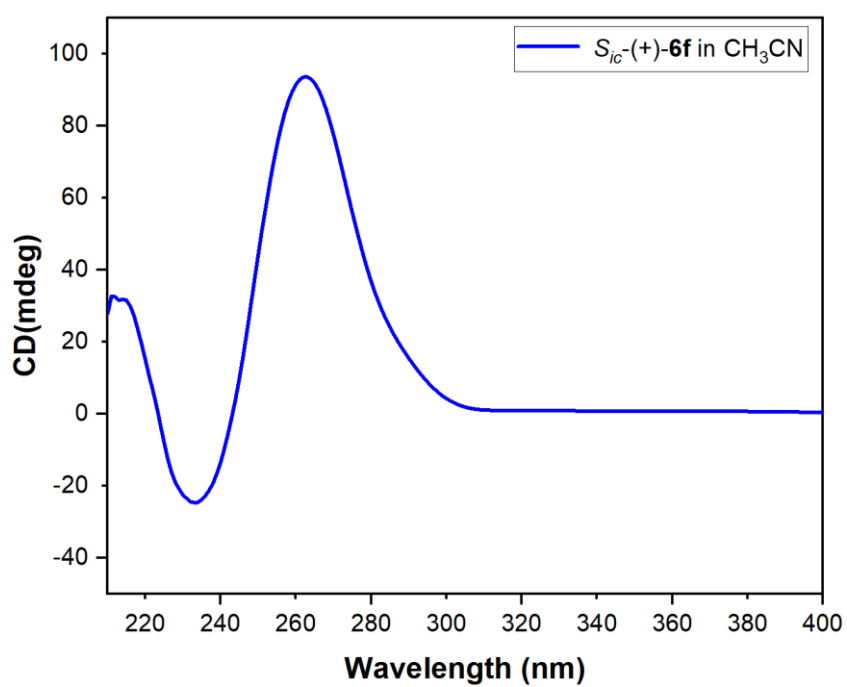

**Figure S12.** CD spectrum of  $S_{ic}-(+)-6f$  in  $CH_3CN$  (5.65 $\times 10^{-5}$  M) at 25 °C.

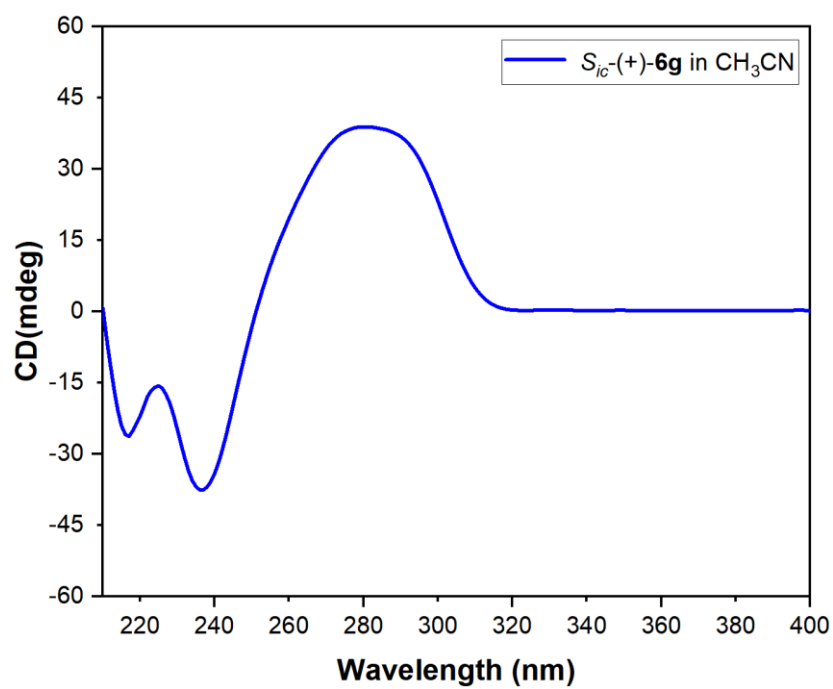

**Figure S13.** CD spectrum of  $S_{ic}$ -(+)-**6g** in  $\text{CH}_3\text{CN}$  ( $5.00 \times 10^{-5}$  M) at 25 °C.

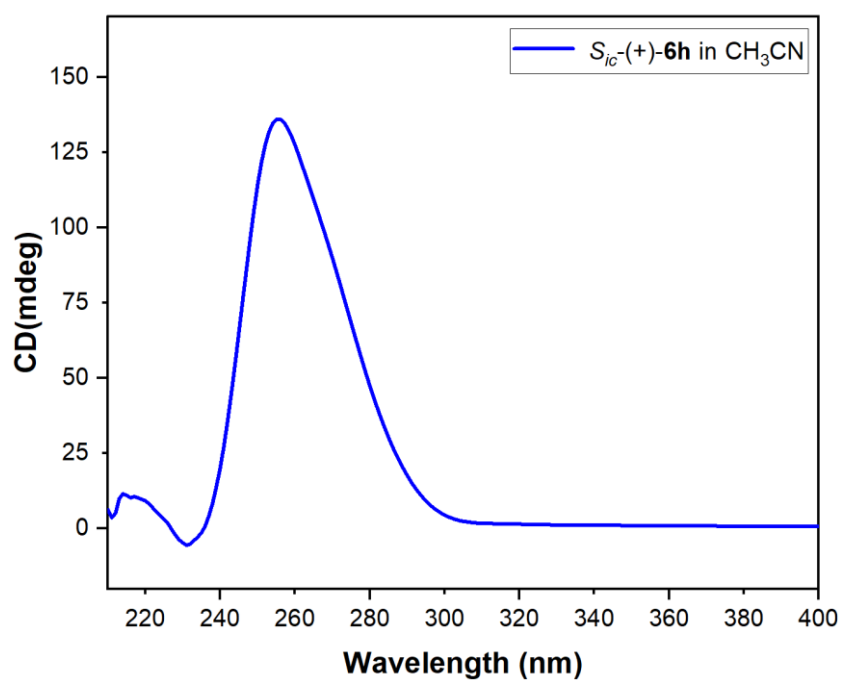

**Figure S14.** CD spectrum of  $S_{ic}$ -(+)-**6h** in  $\text{CH}_3\text{CN}$  ( $5.00 \times 10^{-5}$  M) at 25 °C.

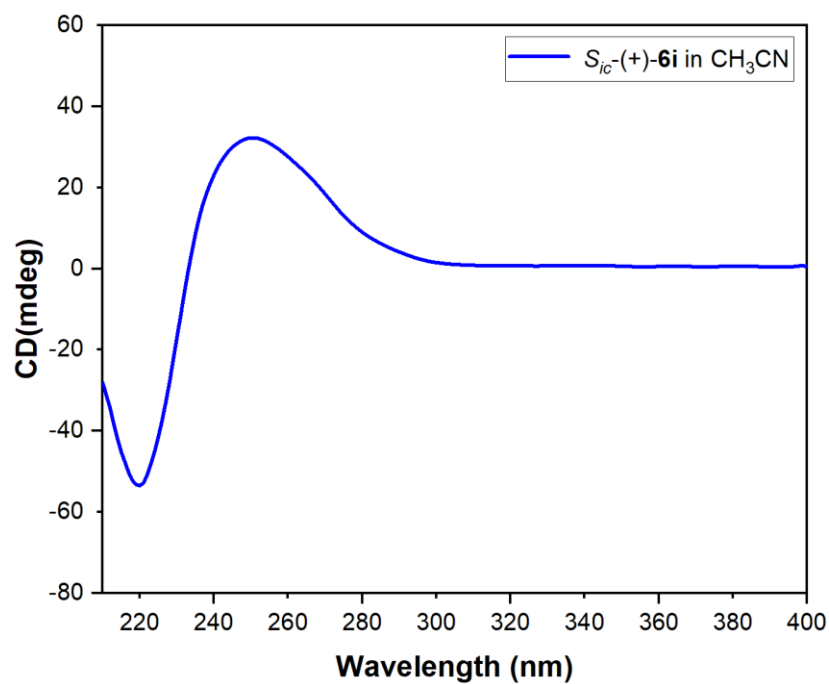

**Figure S15.** CD spectrum of  $S_{ic}-(+)-6i$  in  $CH_3CN$  ( $5.05 \times 10^{-5}$  M) at 25 °C.

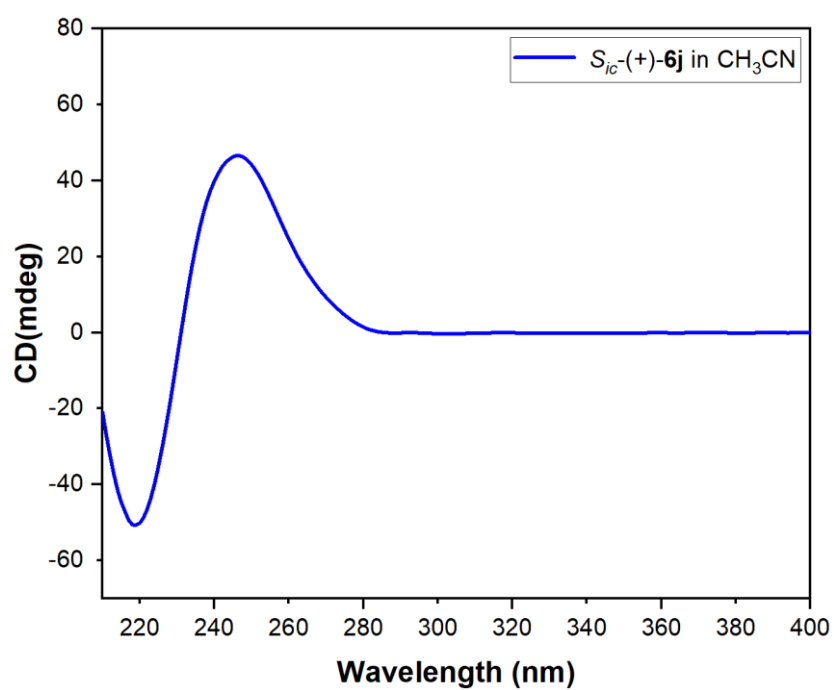

**Figure S16.** CD spectrum of  $S_{ic}-(+)-6j$  in  $CH_3CN$  ( $5.00 \times 10^{-5}$  M) at 25 °C.

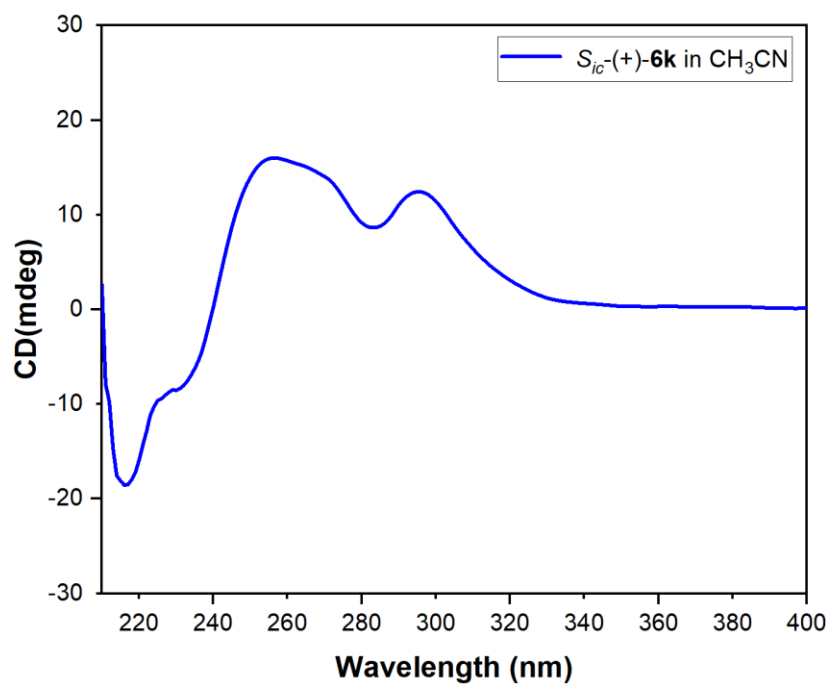

**Figure S17.** CD spectrum of  $S_{ic}-(+)-6\mathbf{k}$  in  $\text{CH}_3\text{CN}$  ( $5.00 \times 10^{-5}$  M) at 25 °C.

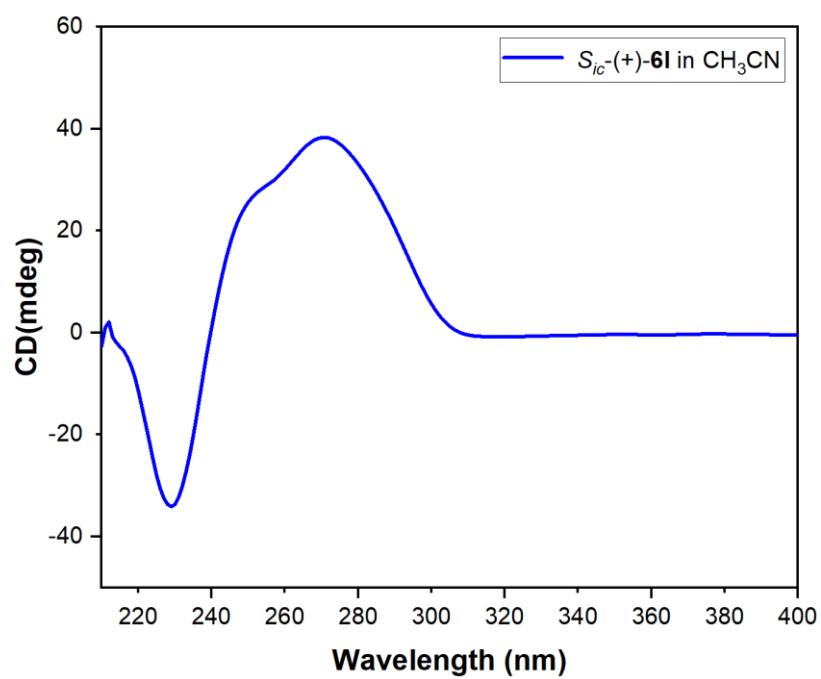

**Figure S18.** CD spectrum of  $S_{ic}-(+)-6\mathbf{l}$  in  $\text{CH}_3\text{CN}$  ( $5.00 \times 10^{-5}$  M) at 25 °C.

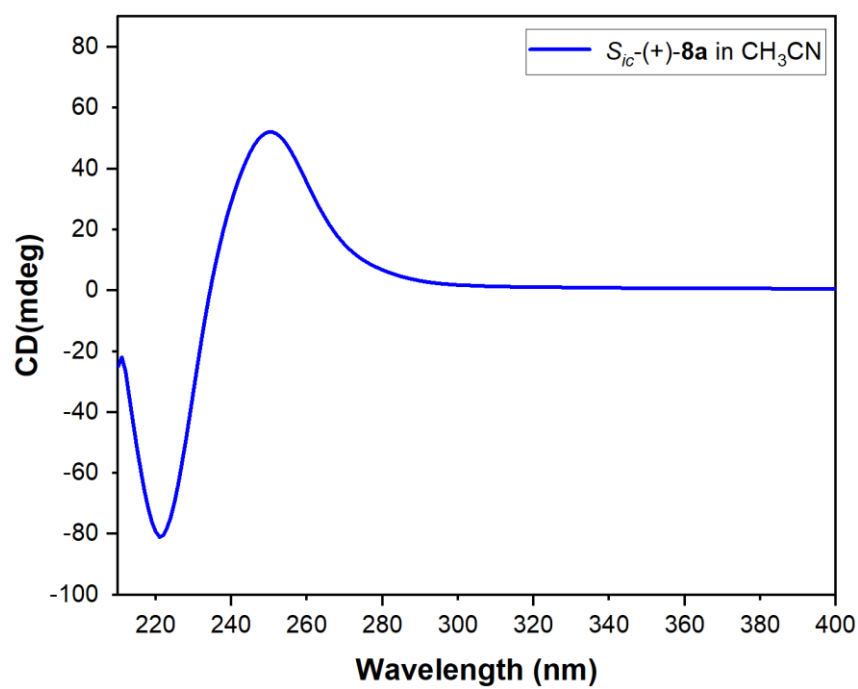

**Figure S19.** CD spectrum of  $S_{ic}-(+)-8a$  in  $CH_3CN$  ( $5.11 \times 10^{-5}$  M) at 25 °C.

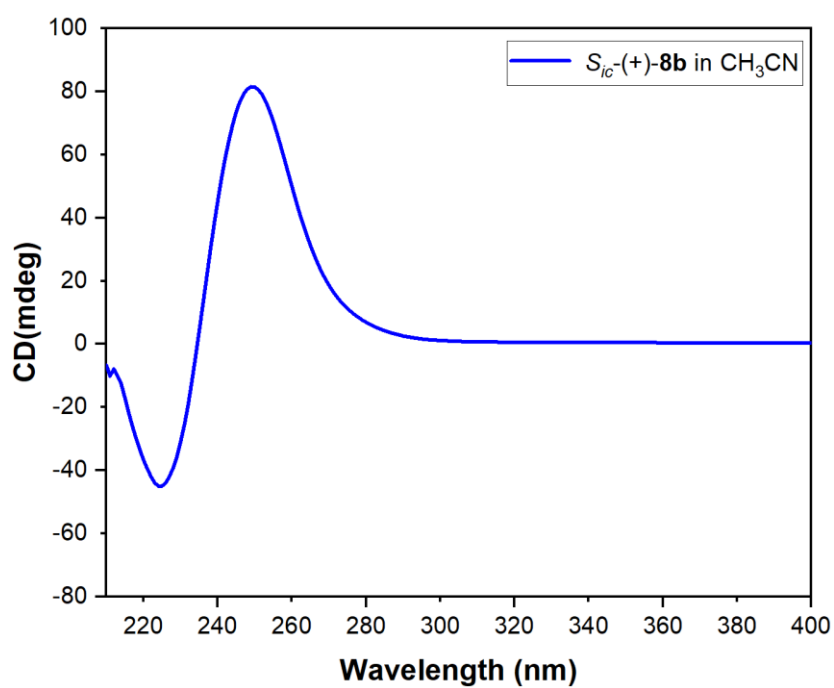

**Figure S20.** CD spectrum of  $S_{ic}-(+)-8b$  in  $CH_3CN$  ( $5.00 \times 10^{-5}$  M) at 25 °C.

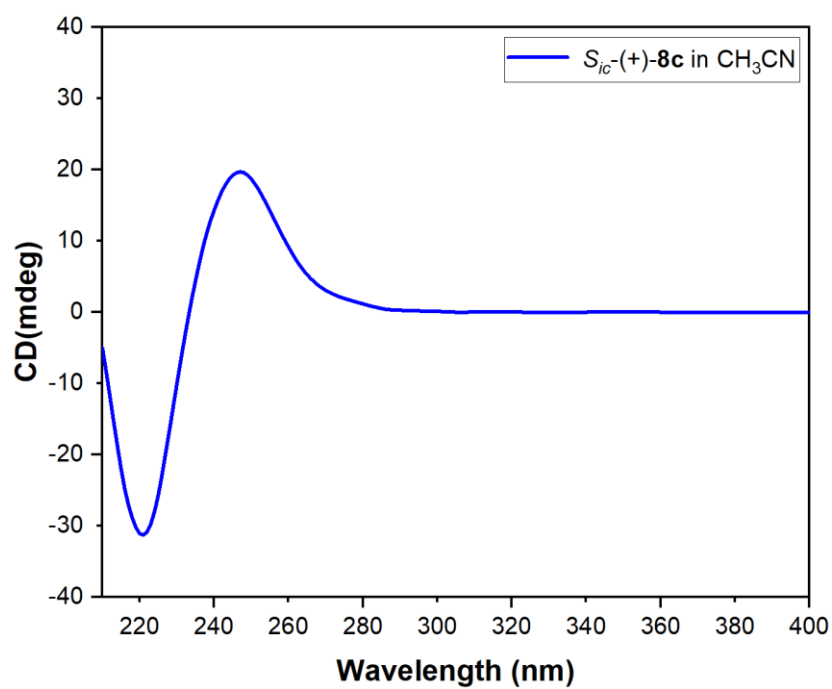

**Figure S21.** CD spectrum of  $S_{ic}-(+)-8c$  in  $CH_3CN$  ( $5.00 \times 10^{-5}$  M) at 25 °C.

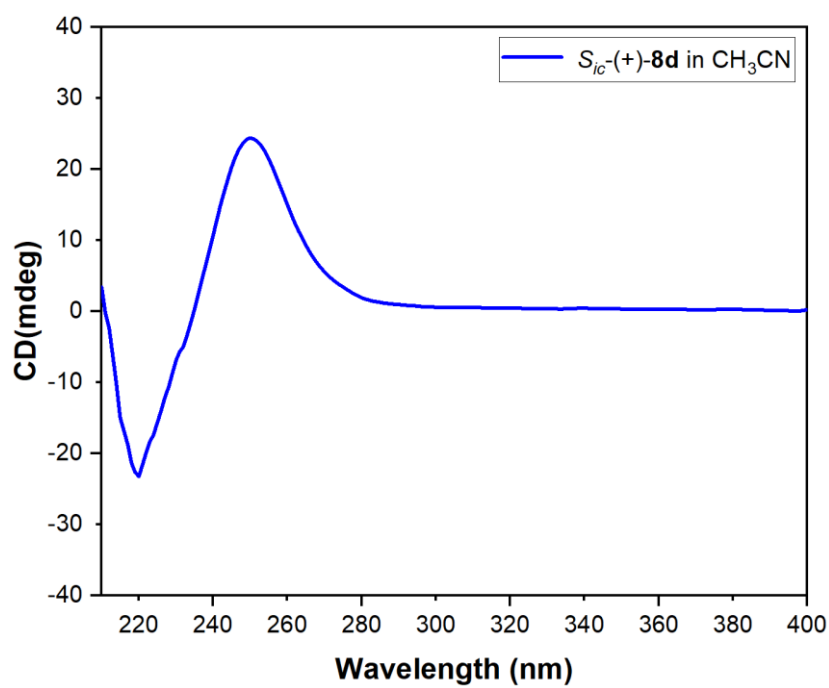

**Figure S22.** CD spectrum of  $S_{ic}-(+)-8d$  in  $CH_3CN$  ( $5.00 \times 10^{-5}$  M) at 25 °C.

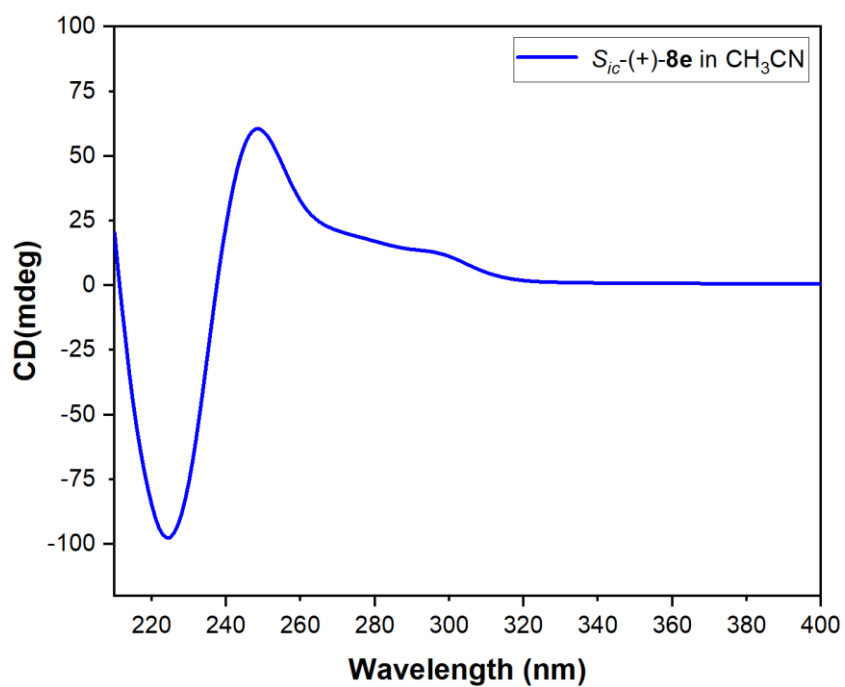

**Figure S23.** CD spectrum of  $S_{ic}-(+)-8e$  in  $CH_3CN$  ( $5.00 \times 10^{-5}$  M) at 25 °C.

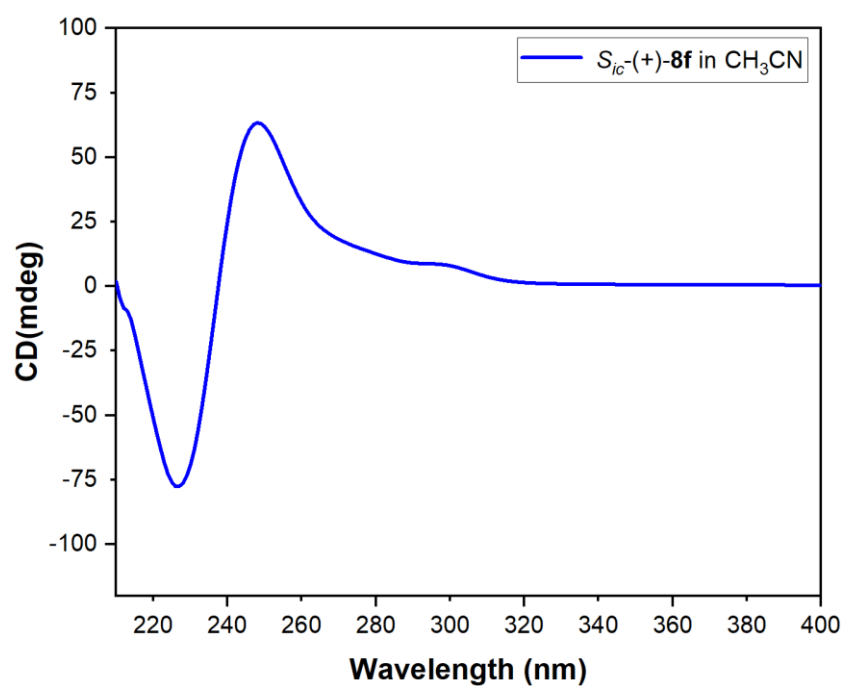

**Figure S24.** CD spectrum of  $S_{ic}-(+)-8f$  in  $CH_3CN$  ( $5.00 \times 10^{-5}$  M) at 25 °C.

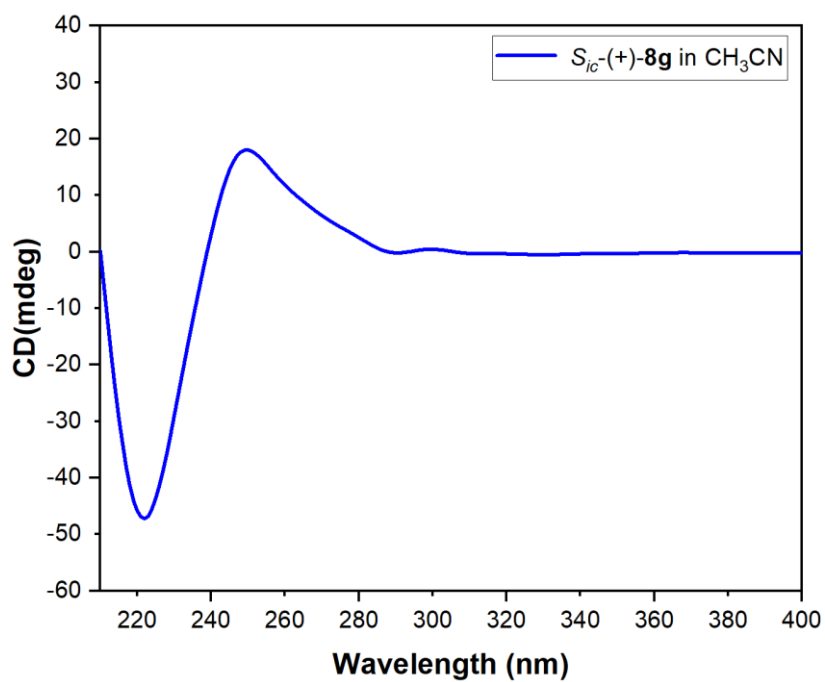

**Figure S25.** CD spectrum of  $S_{ic}-(+)-8g$  in  $CH_3CN$  ( $5.00 \times 10^{-5}$  M) at 25 °C.

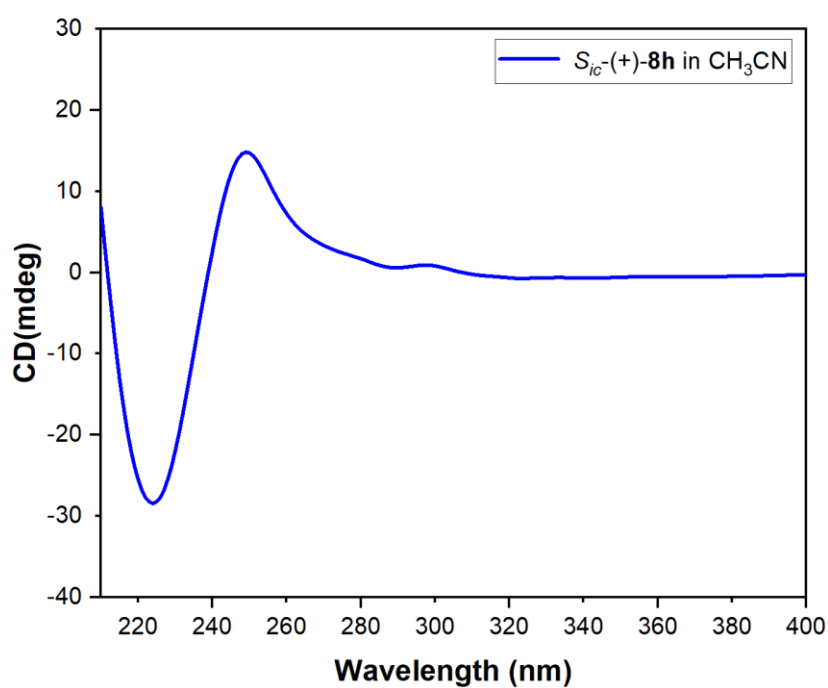

**Figure S26.** CD spectrum of  $S_{ic}-(+)-8h$  in  $CH_3CN$  ( $5.00 \times 10^{-5}$  M) at 25 °C.

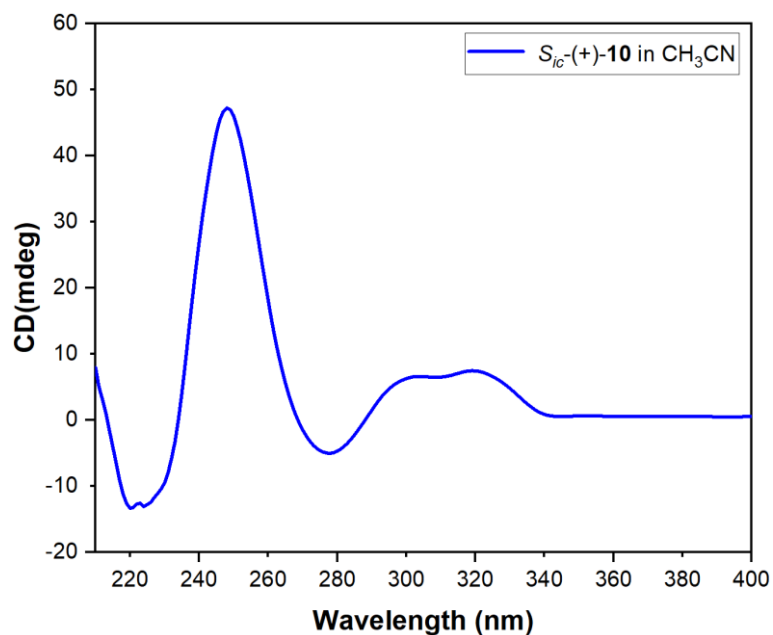

**Figure S27.** CD spectrum of  $S_{ic}-(+)$ -**10** in  $\text{CH}_3\text{CN}$  ( $5.00 \times 10^{-5}$  M) at 25 °C.

**Table S10.**  $g_{\text{abs}}$  values of compounds **6a-6l**, **8a-8h** and **10**.

| compound                 | $\lambda_{\text{CD}}$ [nm] <sup>[a]</sup> | $g_{\text{abs}}$       |
|--------------------------|-------------------------------------------|------------------------|
| $S_{ic}-(+)$ - <b>6a</b> | 263                                       | $2.30 \times 10^{-3}$  |
| $R_{ic}-(-)$ - <b>6a</b> | 263                                       | $-2.30 \times 10^{-3}$ |
| $S_{ic}-(+)$ - <b>6b</b> | 262                                       | $2.17 \times 10^{-3}$  |
| $R_{ic}-(-)$ - <b>6b</b> | 262                                       | $-2.14 \times 10^{-3}$ |
| $S_{ic}-(+)$ - <b>6c</b> | 264                                       | $2.64 \times 10^{-3}$  |
| $S_{ic}-(+)$ - <b>6d</b> | 263                                       | $2.36 \times 10^{-3}$  |
| $S_{ic}-(+)$ - <b>6e</b> | 263                                       | $1.83 \times 10^{-3}$  |
| $S_{ic}-(+)$ - <b>6f</b> | 262                                       | $2.21 \times 10^{-3}$  |
| $S_{ic}-(+)$ - <b>6g</b> | 285                                       | $1.54 \times 10^{-3}$  |
| $S_{ic}-(+)$ - <b>6h</b> | 256                                       | $2.02 \times 10^{-3}$  |
| $S_{ic}-(+)$ - <b>6i</b> | 250                                       | $1.41 \times 10^{-3}$  |
| $S_{ic}-(+)$ - <b>6j</b> | 247                                       | $2.06 \times 10^{-3}$  |
| $S_{ic}-(+)$ - <b>6k</b> | 257                                       | $3.10 \times 10^{-4}$  |
| $S_{ic}-(+)$ - <b>6l</b> | 271                                       | $1.24 \times 10^{-3}$  |
| $S_{ic}-(+)$ - <b>8a</b> | 251                                       | $2.35 \times 10^{-3}$  |
| $S_{ic}-(+)$ - <b>8b</b> | 250                                       | $2.15 \times 10^{-3}$  |
| $S_{ic}-(+)$ - <b>8c</b> | 247                                       | $1.56 \times 10^{-3}$  |
| $S_{ic}-(+)$ - <b>8d</b> | 250                                       | $1.19 \times 10^{-3}$  |
| $S_{ic}-(+)$ - <b>8e</b> | 248                                       | $1.73 \times 10^{-3}$  |
| $S_{ic}-(+)$ - <b>8f</b> | 248                                       | $1.77 \times 10^{-3}$  |
| $S_{ic}-(+)$ - <b>8g</b> | 249                                       | $1.25 \times 10^{-3}$  |
| $S_{ic}-(+)$ - <b>8h</b> | 249                                       | $1.16 \times 10^{-3}$  |
| $S_{ic}-(+)$ - <b>10</b> | 319                                       | $1.96 \times 10^{-4}$  |

<sup>[a]</sup>The wavelength corresponding to the first Cotton effect.

### 13. Result of a control experiment

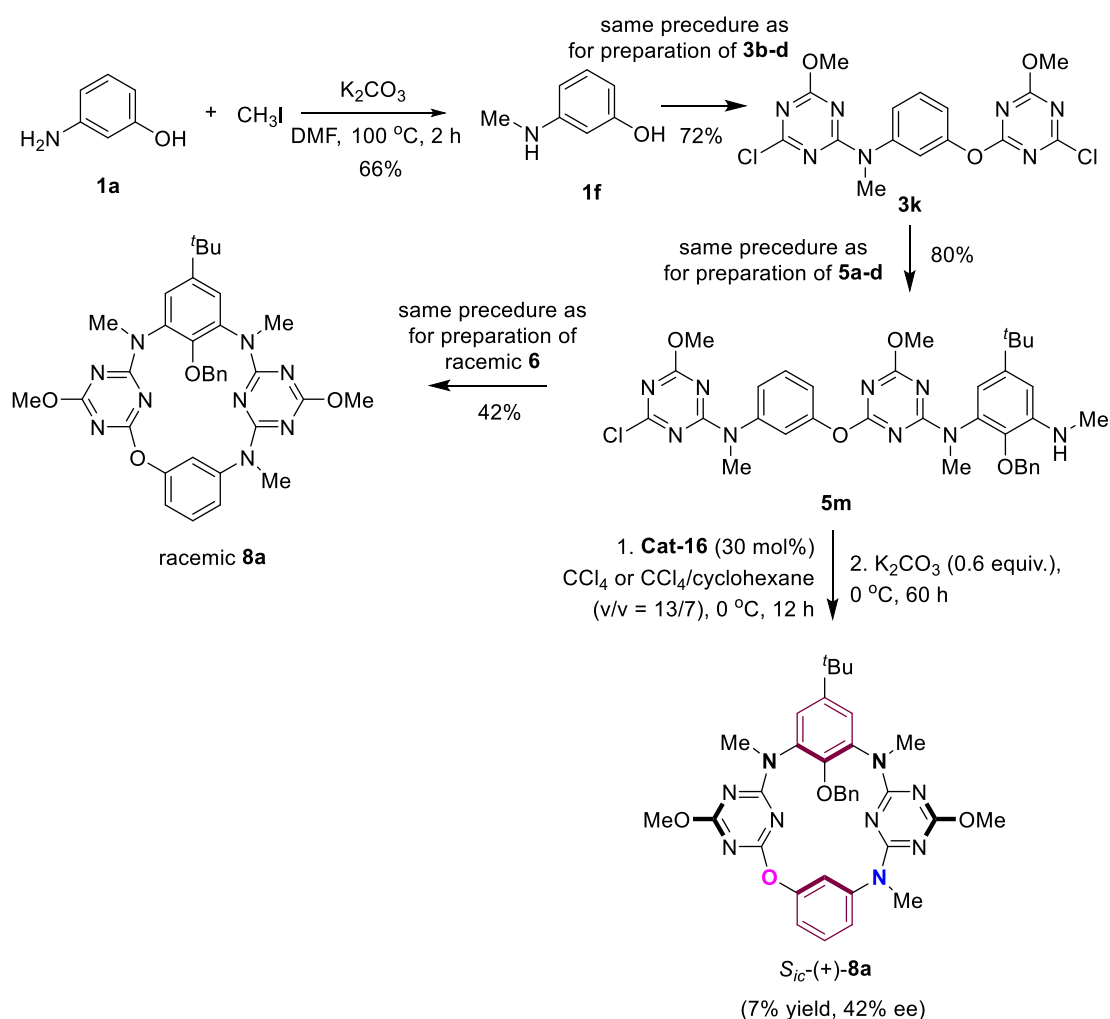

To a solution of **1a** (1.09 g, 10 mmol) and  $\text{K}_2\text{CO}_3$  (1.38 g, 10 mmol, 1.0 equiv) in DMF (10 mL) at room temperature was added  $\text{CH}_3\text{I}$  (1.42 g, 10 mmol, 1.0 equiv) and the resulting mixture was kept stirring for 2 h. After filtration through a celite pad and washing with ethyl acetate (3 X 10 mL), the filtrate was concentrated to dryness. The residue was dissolved in ethyl acetate (20 mL) and washed with saline (3 X 10 mL). The organic phase was dried over anhydrous  $\text{Na}_2\text{SO}_4$ . After removal of organic solvent, the residue was chromatographed with silica gel using a mixture of petroleum ether and ethyl acetate (v/v = 4/1) as an eluent to give product **1f** as brown oil, 812.0 mg, 66% yield.  $^1\text{H}$  NMR (600 MHz,  $\text{CDCl}_3$ )  $\delta$  (ppm): 7.04 (t,  $J = 7.8$  Hz, 1H), 6.24 (d,  $J = 7.8$  Hz, 2H), 6.08 (s, 1H), 5.04 (brs, 2H), 2.74 (s, 3H).  $^{13}\text{C}$  NMR (100 MHz,  $\text{CDCl}_3$ )  $\delta$  (ppm): 156.8, 150.1, 130.3, 106.2, 105.9, 100.9, 31.1. IR (KBr)  $\nu$  3410, 3333, 1612, 1504  $\text{cm}^{-1}$ .

Following the same synthetic procedure for **3b-d**, product **3k** was obtained as white solid, 589.0 mg, 72% yield, m.p. = 152 - 153  $^\circ\text{C}$ .  $^1\text{H}$  NMR (400 MHz,  $\text{CDCl}_3$ )  $\delta$  (ppm): 7.48 (t,  $J = 8.4$  Hz, 1H), 7.25 - 7.22 (m, 1H), 7.15 - 7.12 (m, 2H), 4.03 (s, 3H), 3.84 (br, 3H), 3.55 (s, 3H).  $^{13}\text{C}$  NMR (100 MHz,  $\text{CDCl}_3$ )  $\delta$  (ppm): 173.4, 172.9, 172.1, 170.9, 166.5, 151.7, 144.2, 130.2, 124.4, 120.1, 120.0, 56.5, 55.4, 38.7. IR (KBr)  $\nu$ : 1566  $\text{cm}^{-1}$ . HRMS (TOF-ESI)  $m/z$   $[\text{M}+\text{H}]^+$  calcd. for  $\text{C}_{15}\text{H}_{14}\text{Cl}_2\text{N}_7\text{O}_3$ : 410.0529; Found: 410.0535.

Following the same synthetic procedure for **5a-d**, product **5m** was obtained as white solid, 268.5

mg, 80% yield, m.p. = 70 - 72 °C. <sup>1</sup>H NMR (400 MHz, CDCl<sub>3</sub>) δ (ppm): 7.44 (t, J = 8.4 Hz, 0.57H), 7.30 - 7.17 (m, 8H), 7.07 - 7.00 (m, 1.43H), 6.61 (s, 0.57H), 6.55 (s, 0.43H), 6.54 (s, 0.57H), 6.45 (s, 0.43H), 4.72 - 4.66 (m, 2H), 4.12 - 3.98 (m, 3H), 3.79 - 3.70 (m, 3H), 3.54 (s, 1.7H), 3.44 (s, 1.3H), 3.37 (s, 3H), 2.81 (s, 1.7H), 2.79 (s, 1.3H), 1.30 (s, 5.1H), 1.24 (s, 3.9H). <sup>13</sup>C NMR (100 MHz, CDCl<sub>3</sub>) δ (ppm): 172.5, 172.0, 171.9, 171.1, 167.7, 166.3, 166.1, 152.4, 152.3, 148.2, 148.1, 143.6, 143.2, 136.9, 136.8, 135.8, 135.7, 129.7, 129.2, 128.4, 128.2, 128.1, 128.0, 127.8, 123.4, 123.0, 120.6, 120.4, 119.8, 75.3, 55.2, 54.8, 54.6, 38.6, 38.0, 37.7, 34.74, 34.65, 31.3, 31.2. IR (KBr) ν: 1744, 1574 cm<sup>-1</sup>. HRMS (TOF-ESI) m/z [M+H]<sup>+</sup> calcd. for C<sub>34</sub>H<sub>39</sub>ClN<sub>9</sub>O<sub>4</sub>: 672.2808; Found: 672.2796.

Following the same synthetic procedure for racemic **6**, racemic product **8a** was obtained as white solid, 27.0 mg, 42% yield.

Following the same catalytic enantioselective reaction of **5**, *S<sub>ic</sub>*-**8a** was obtained in 7% yield and 42% ee.

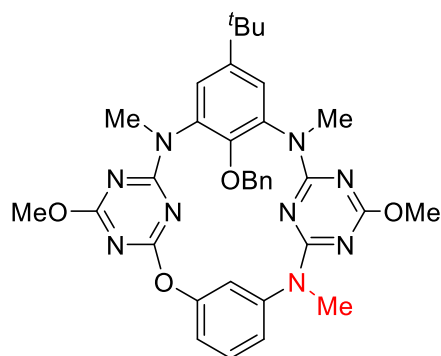

#### <Chromatogram>

mV

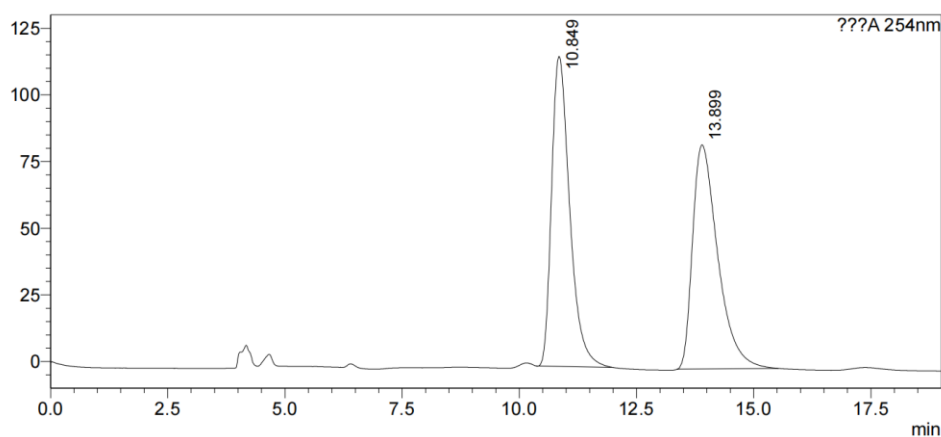

#### <Peak Table>

???A 254nm

| Peak# | Ret. Time | Area    | Height | Conc.  | Area%   | Height% |
|-------|-----------|---------|--------|--------|---------|---------|
| 1     | 10.849    | 3125169 | 116302 | 49.810 | 49.810  | 58.050  |
| 2     | 13.899    | 3149065 | 84045  | 50.190 | 50.190  | 41.950  |
| Total |           | 6274234 | 200347 |        | 100.000 | 100.000 |

### <Chromatogram>

mV

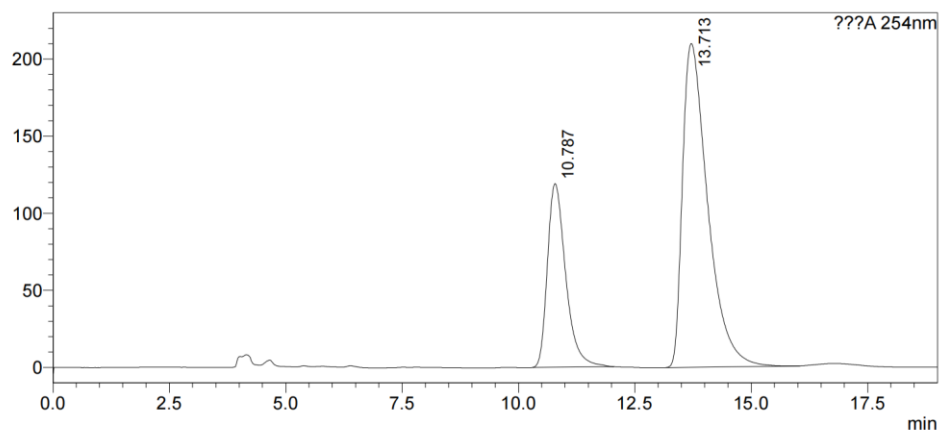

### <Peak Table>

???A 254nm

| Peak# | Ret. Time | Area     | Height | Conc.  | Area%   | Height% |
|-------|-----------|----------|--------|--------|---------|---------|
| 1     | 10.787    | 3254294  | 119035 | 29.127 | 29.127  | 36.182  |
| 2     | 13.713    | 7918627  | 209953 | 70.873 | 70.873  | 63.818  |
| Total |           | 11172921 | 328988 |        | 100.000 | 100.000 |

HPLC analysis of racemic sample of **8a** (top) and enantioenriched sample of *S<sub>ic</sub>*-**8a** (bottom).

## 14. <sup>1</sup>H and <sup>13</sup>C NMR spectra of all products

**2a**: <sup>1</sup>H NMR, 600 MHz, acetone-*d*<sub>6</sub>

1xc-OMe 1 — single\_pulse

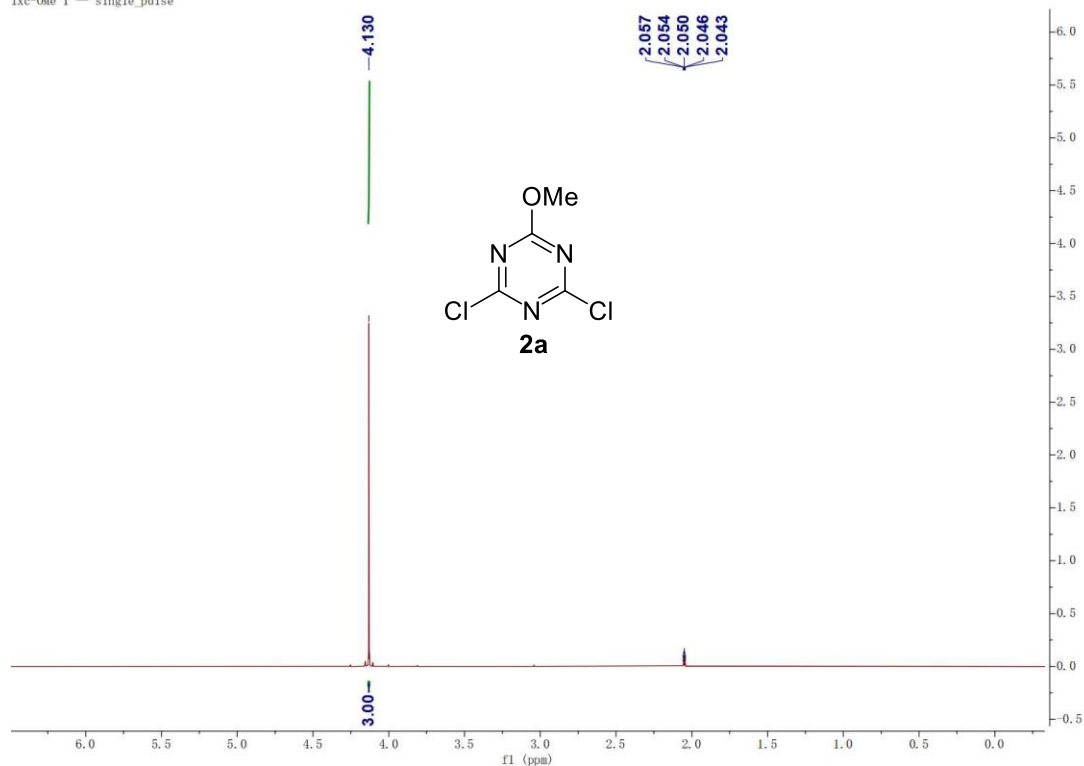

**2a**: <sup>13</sup>C NMR, 150 MHz, acetone-*d*<sub>6</sub>

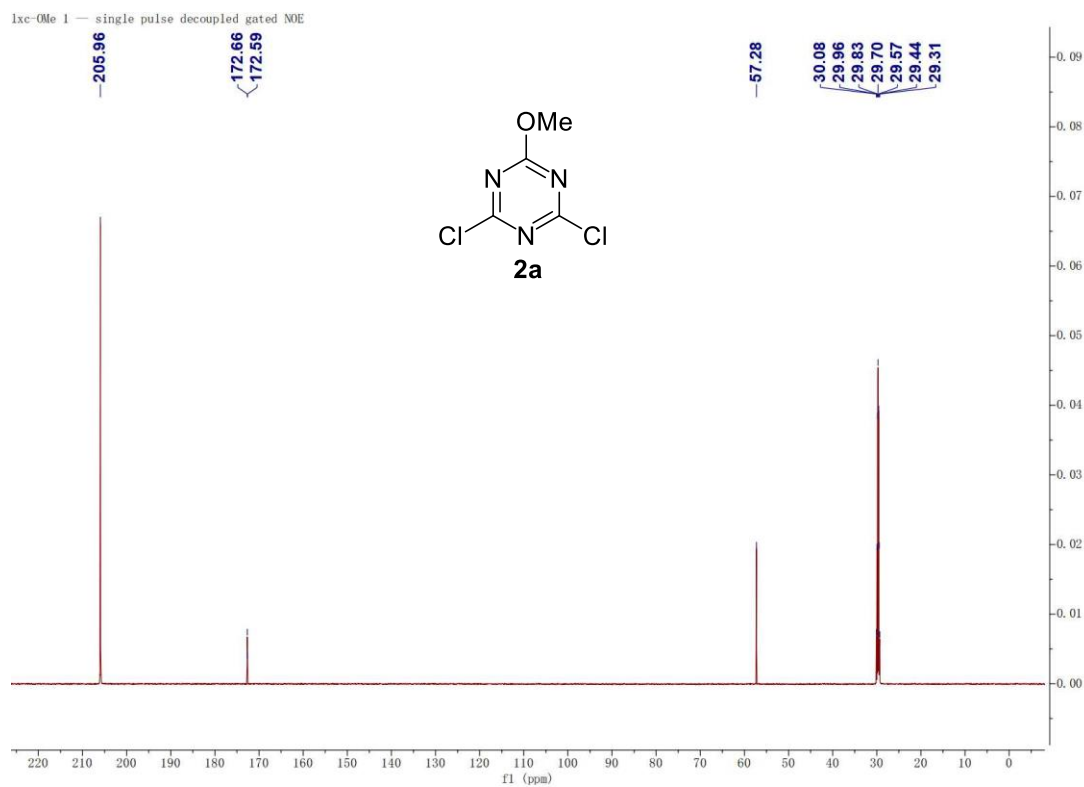

**2b**:  $^1\text{H}$  NMR, 600 MHz,  $\text{CDCl}_3$

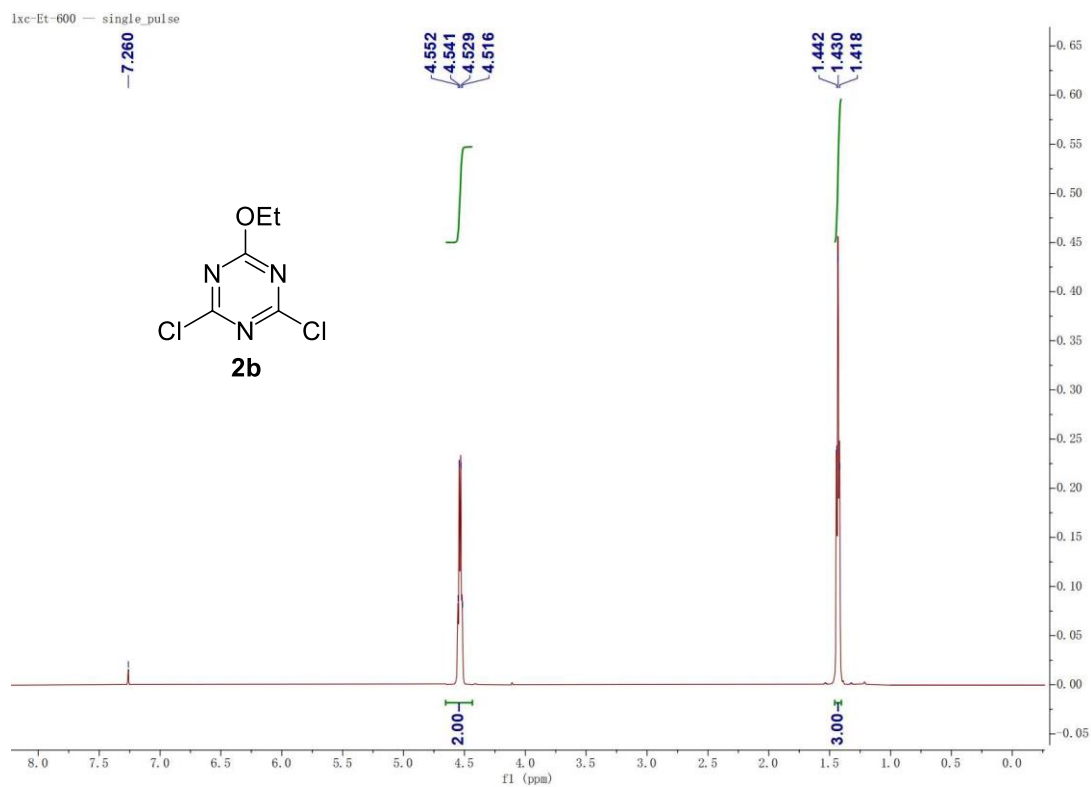

**2b**:  $^{13}\text{C}$  NMR, 150 MHz,  $\text{CDCl}_3$

lxc-Et-600 — single pulse decoupled gated NOE

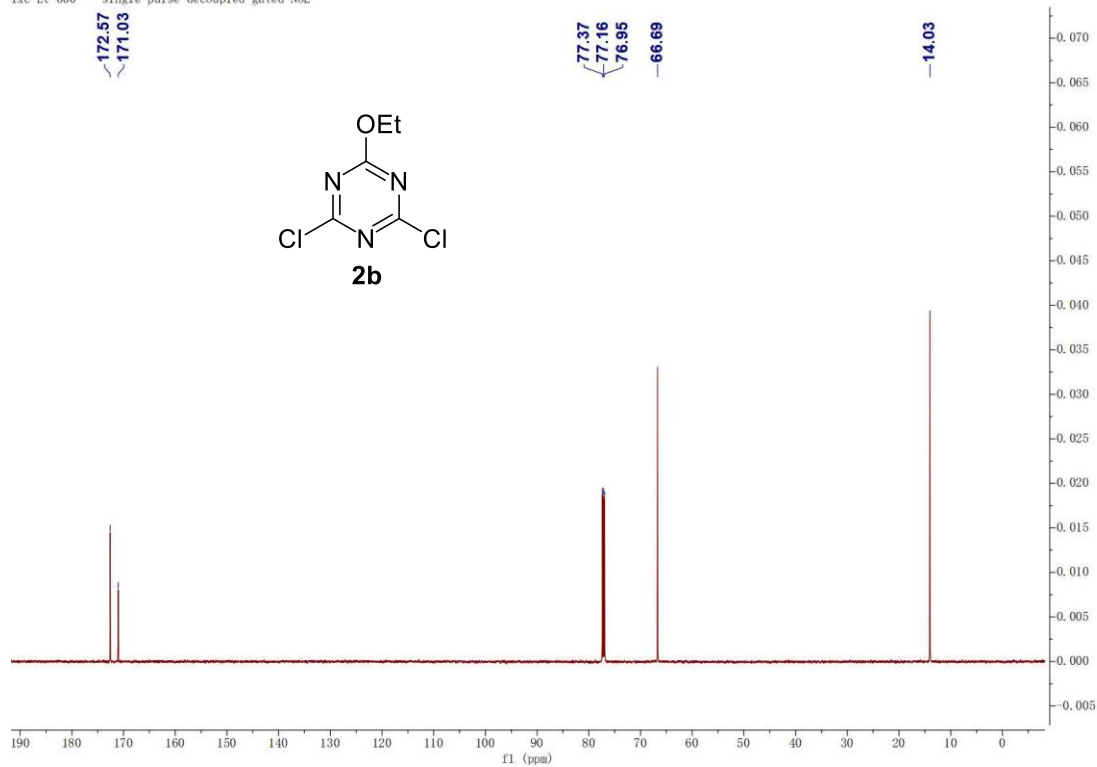

**2c**: <sup>1</sup>H NMR, 400 MHz, acetone-*d*<sub>6</sub>

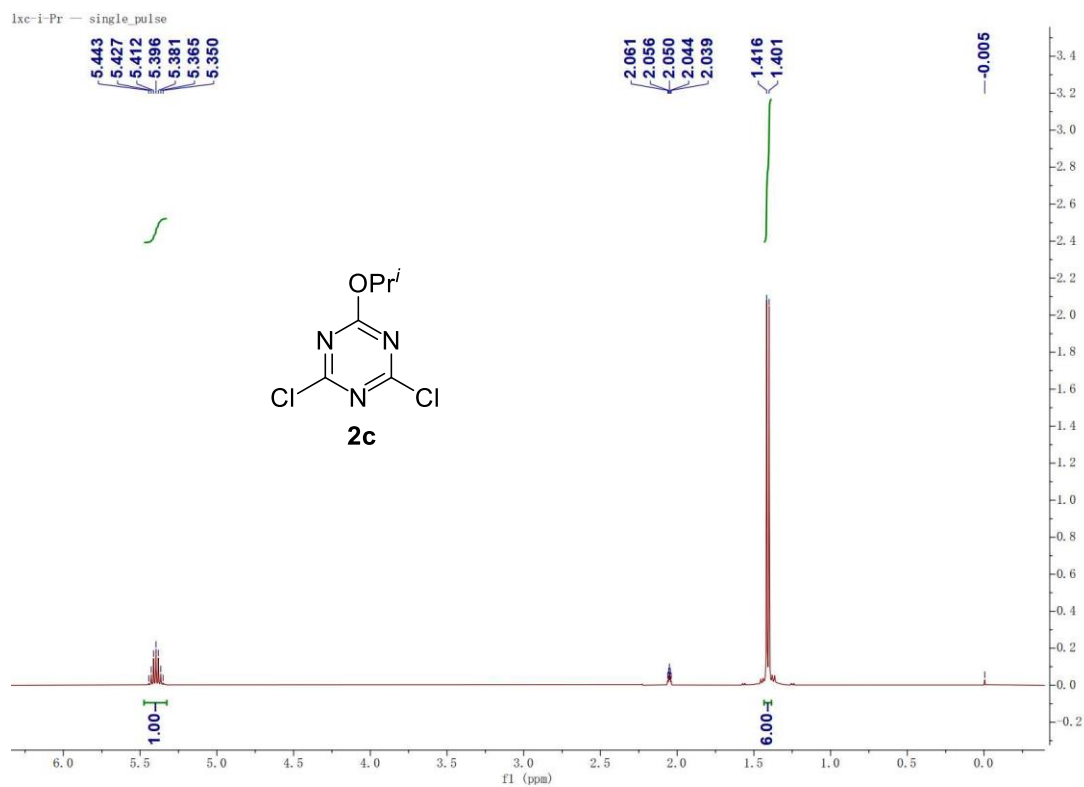

**2c**: <sup>13</sup>C NMR, 100 MHz, acetone-*d*<sub>6</sub>

lxc-i-Pr 1 — single pulse decoupled gated NOE

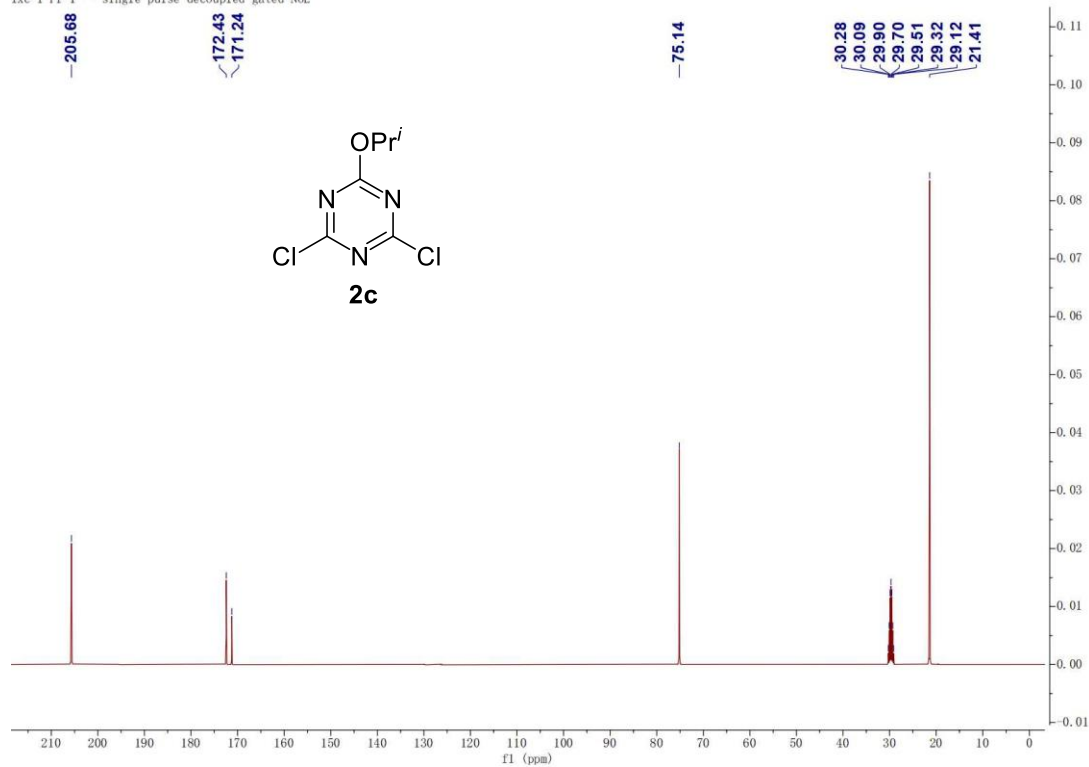

**4d**: <sup>1</sup>H NMR, 400 MHz, acetone-*d*<sub>6</sub>

lxc-OBn 1 — single\_pulse

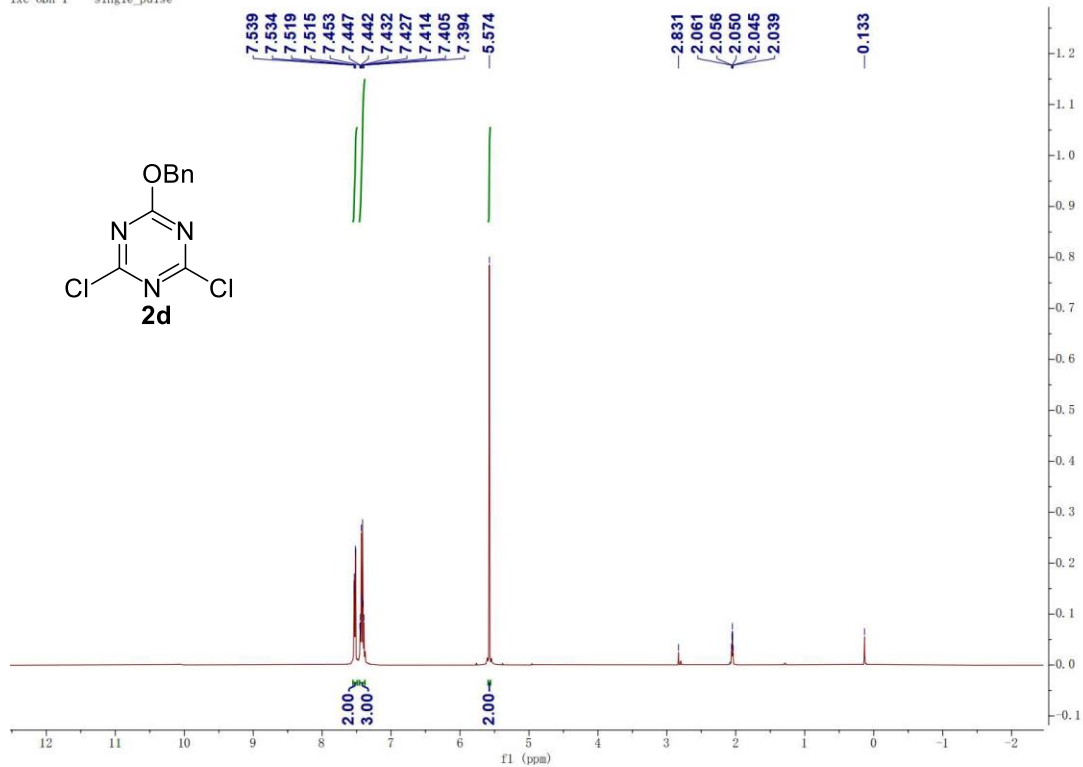

**2d**: <sup>13</sup>C NMR, 100 MHz, CDCl<sub>3</sub>

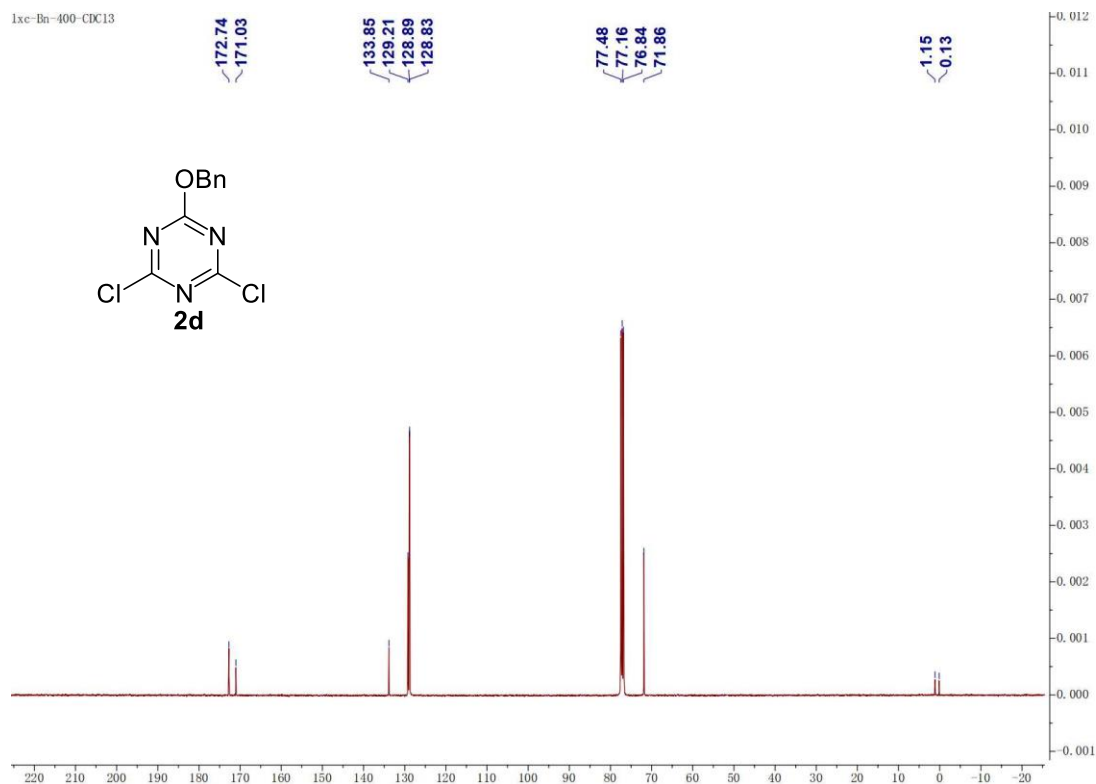

**2e**: <sup>1</sup>H NMR, 600 MHz, CDCl<sub>3</sub>

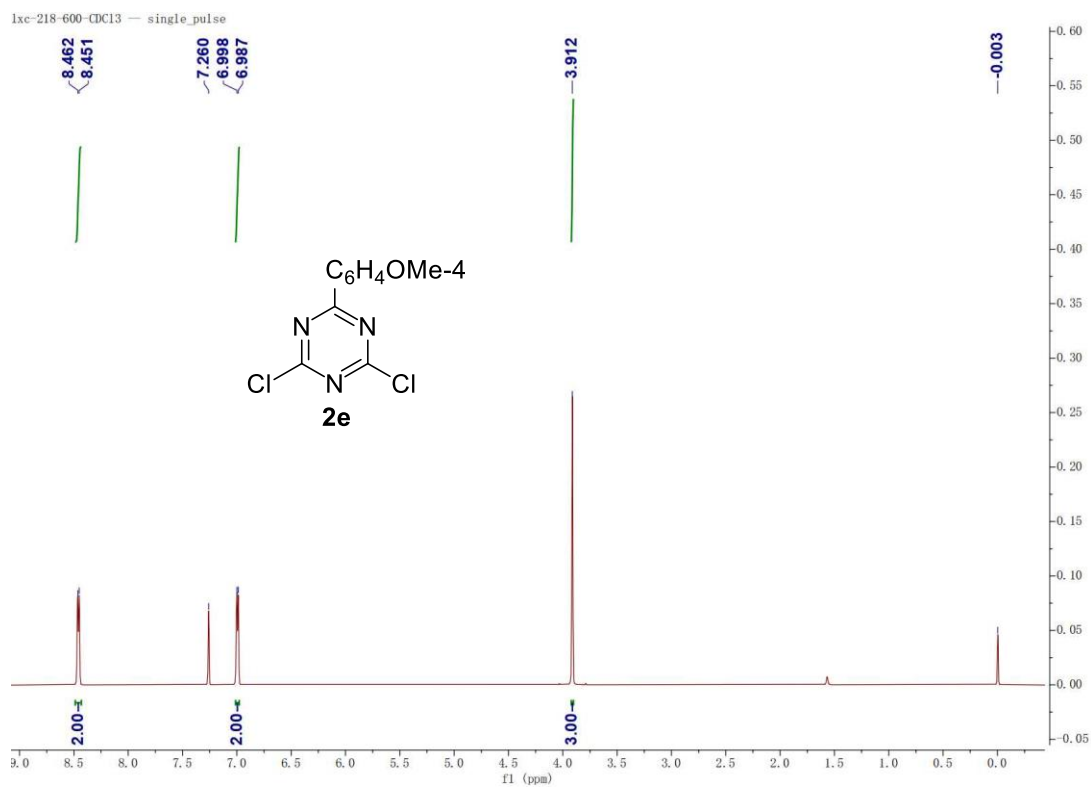

**2e**: <sup>13</sup>C NMR, 150 MHz, CDCl<sub>3</sub>

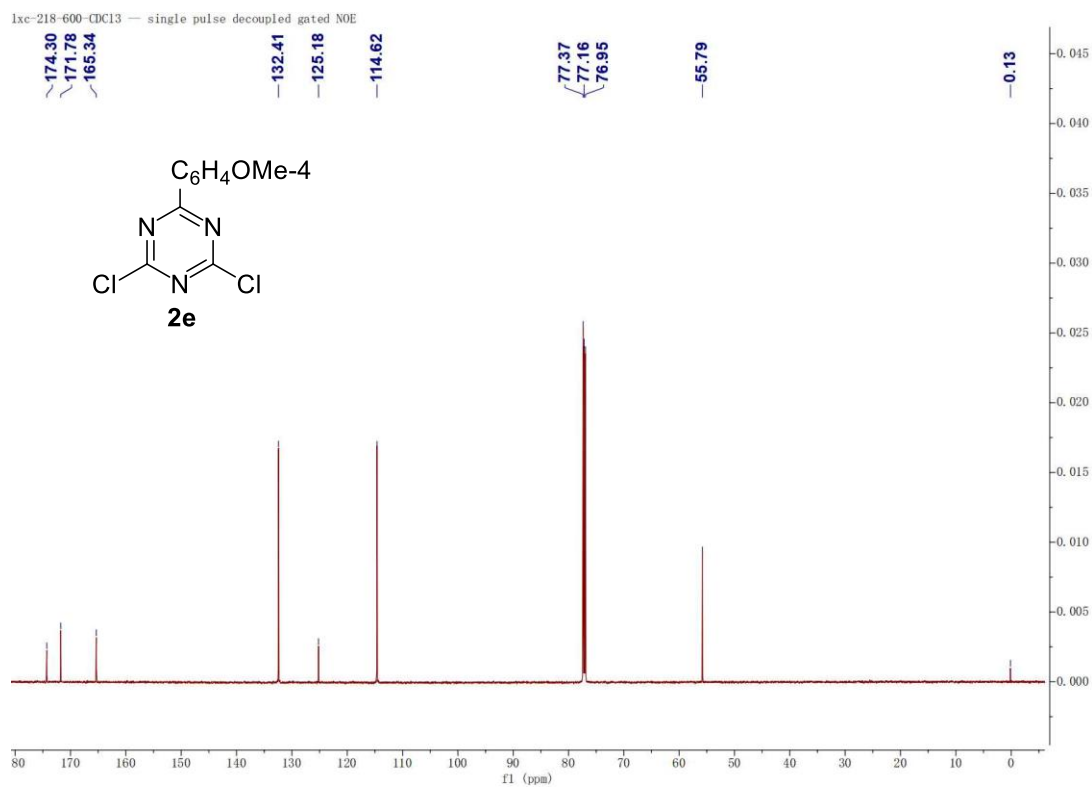

**2f**: <sup>1</sup>H NMR, 600 MHz, CDCl<sub>3</sub>

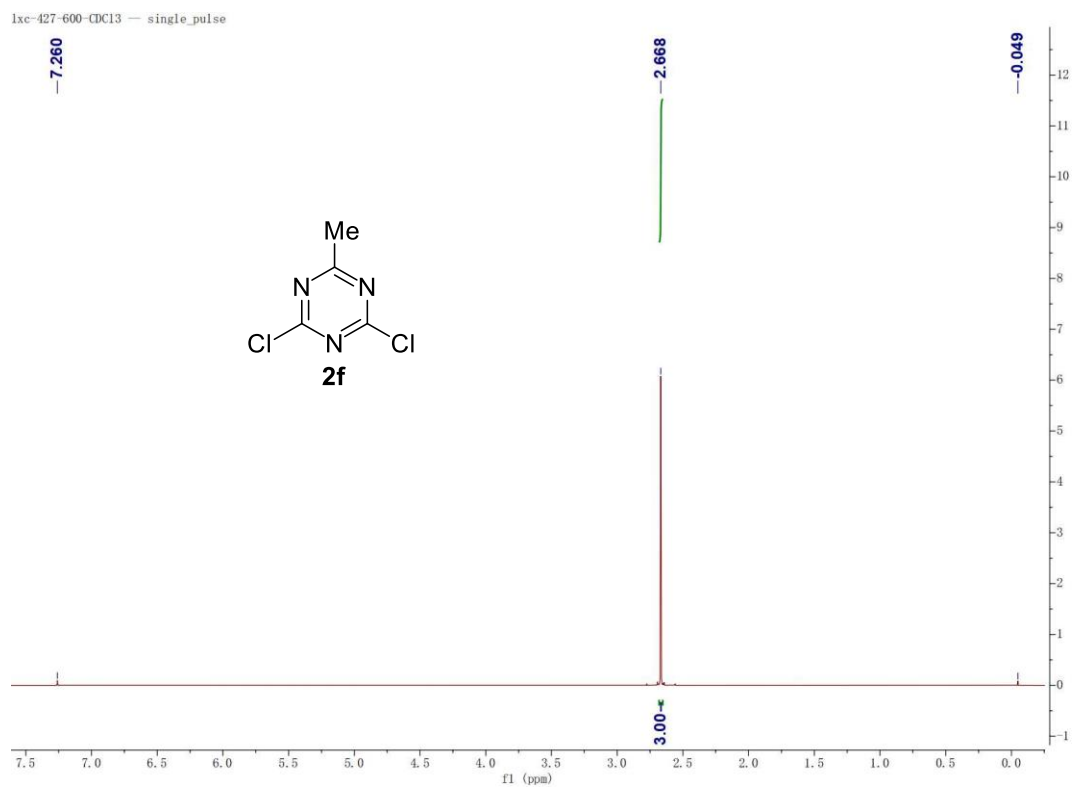

**2f**: <sup>13</sup>C NMR, 150 MHz, CDCl<sub>3</sub>

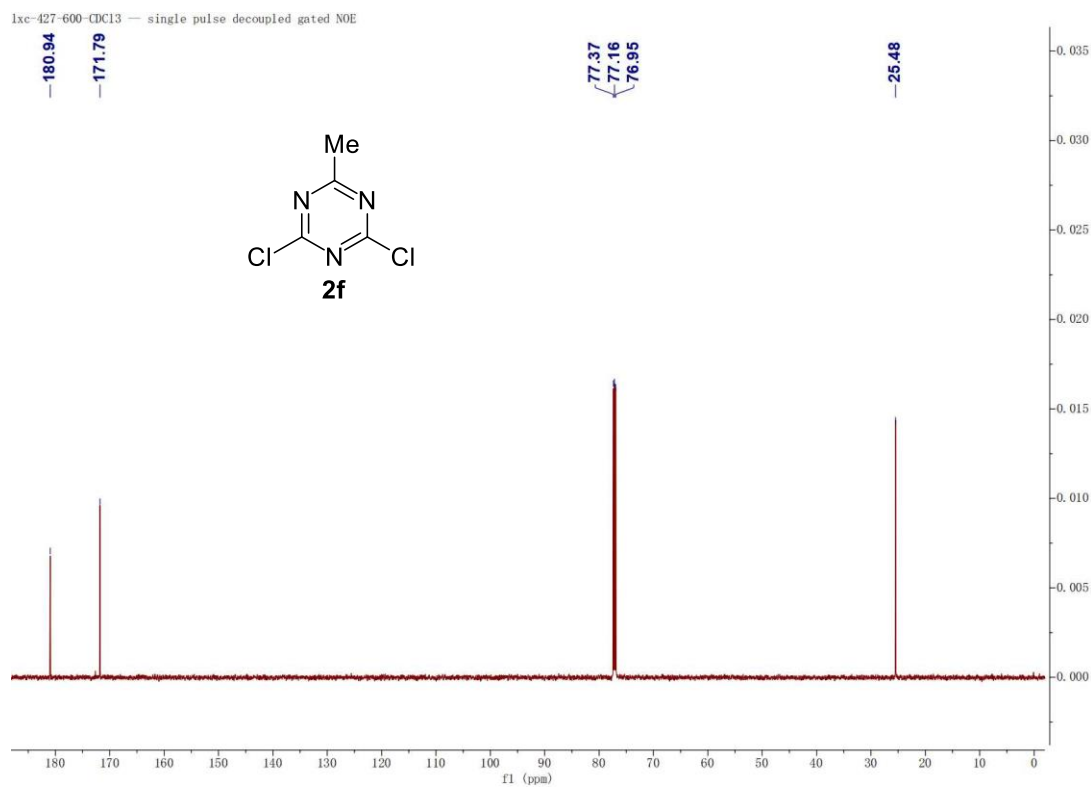

**3a**: <sup>1</sup>H NMR, 400 MHz, acetone-*d*<sub>6</sub>

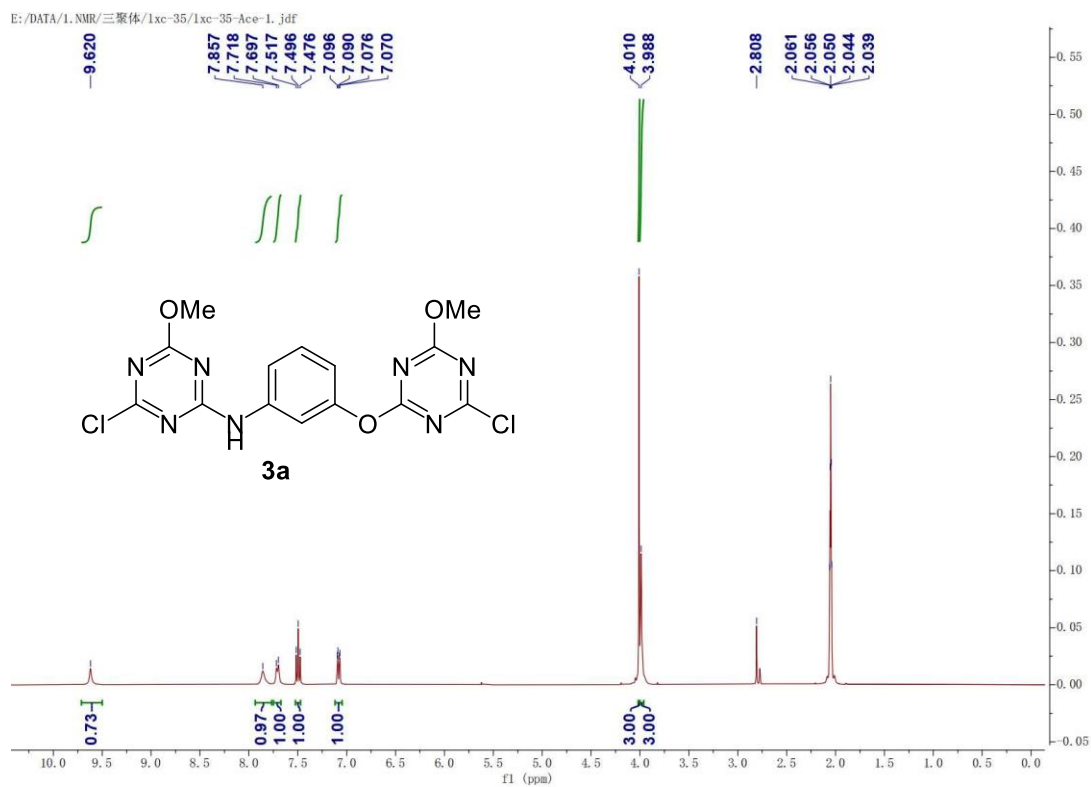

**3a**: <sup>13</sup>C NMR, 100 MHz, CDCl<sub>3</sub>

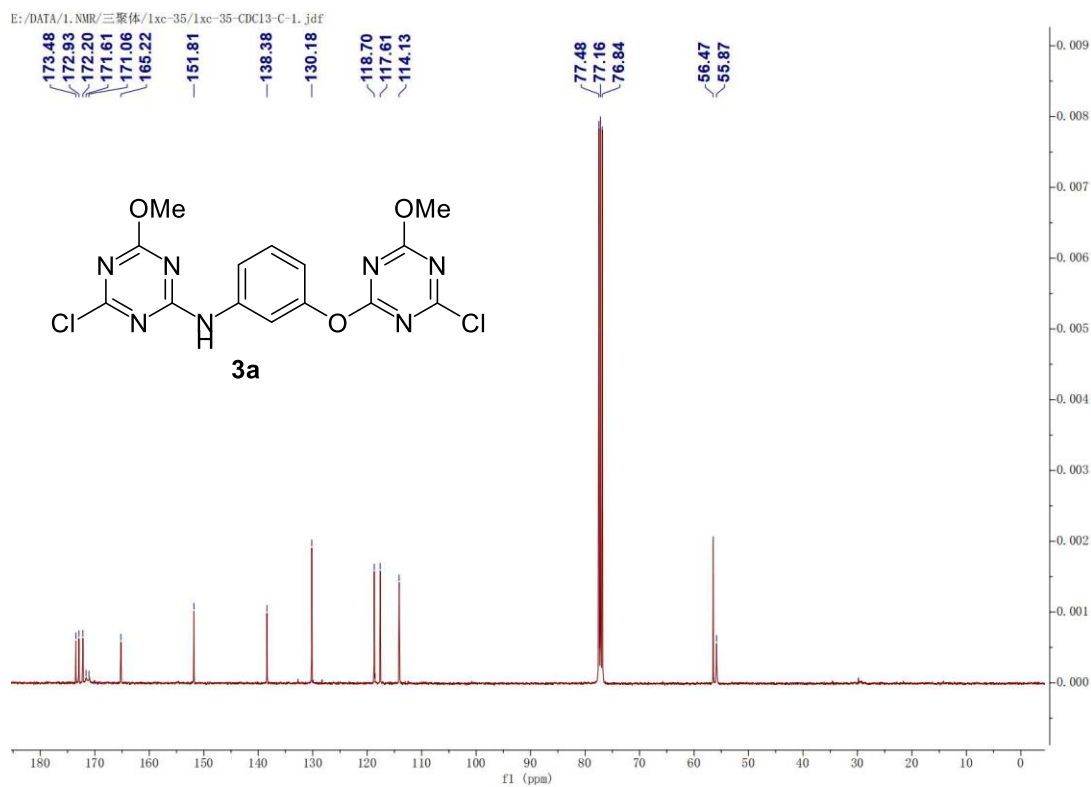

**3b: <sup>1</sup>H NMR, 400 MHz, acetone-*d*<sub>6</sub>**

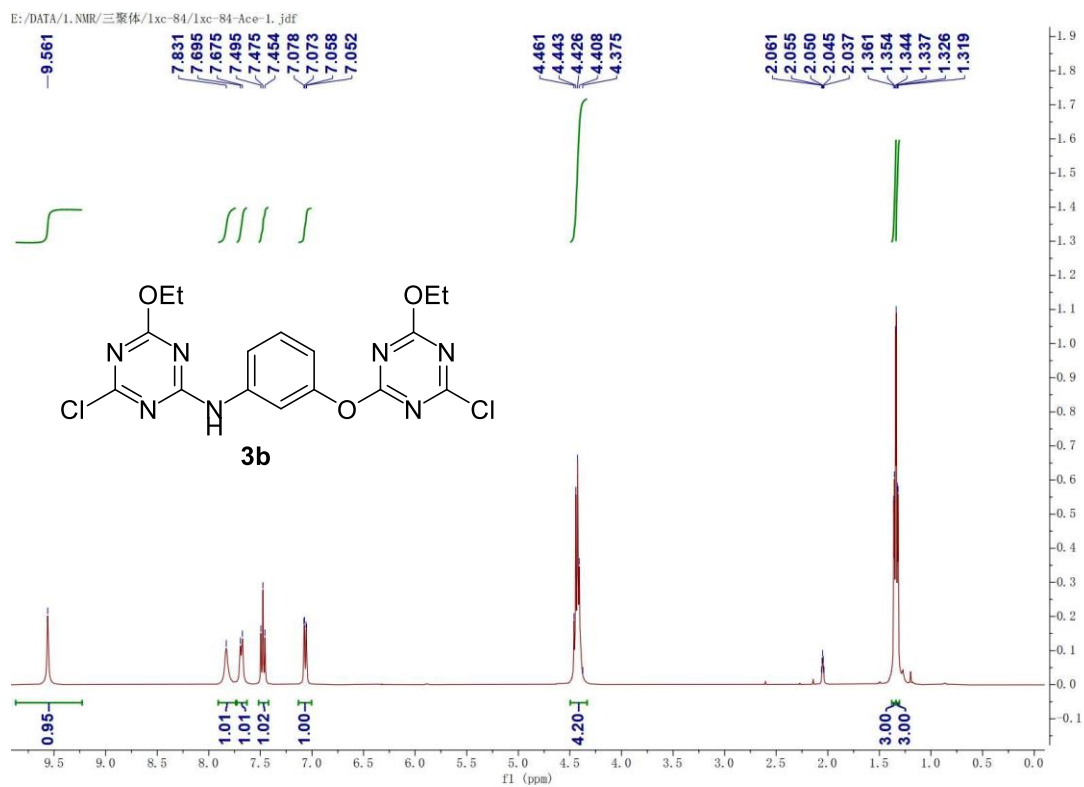

**3b: <sup>13</sup>C NMR, 100 MHz, acetone-*d*<sub>6</sub>**

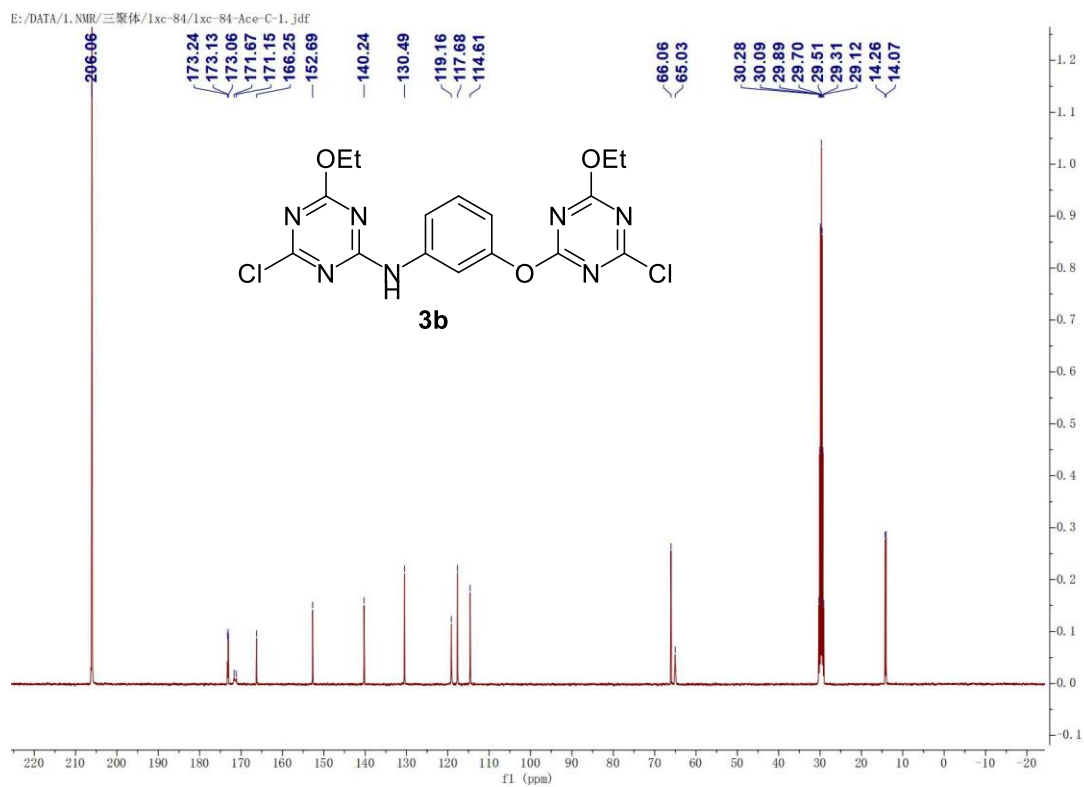

**3c: <sup>1</sup>H NMR, 400 MHz, acetone-*d*<sub>6</sub>**

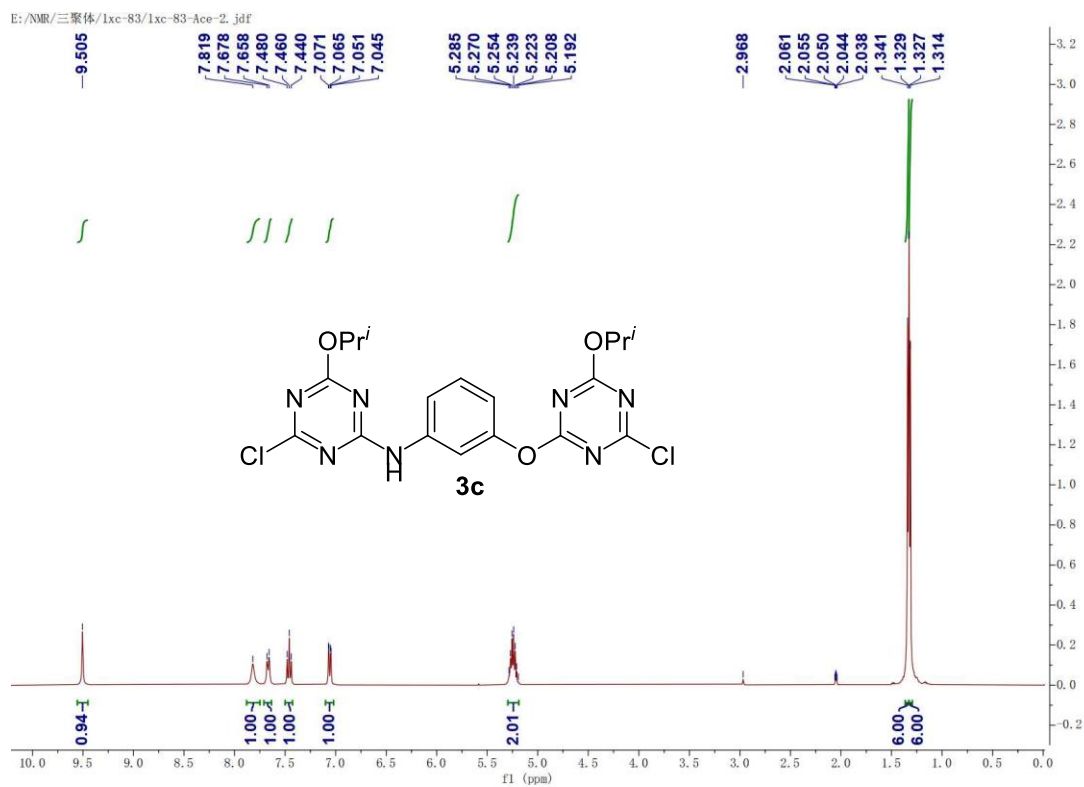

**3c: <sup>13</sup>C NMR, 100 MHz, acetone-*d*<sub>6</sub>**

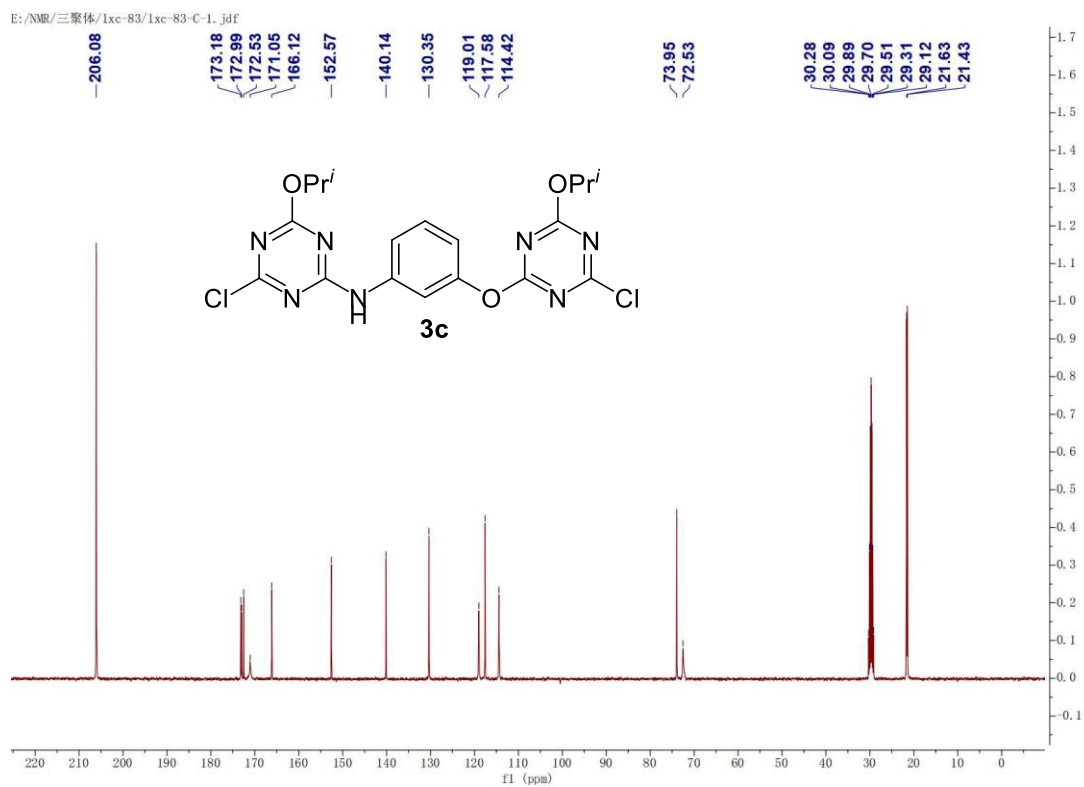

**3d**: <sup>1</sup>H NMR, 400 MHz, acetone-*d*<sub>6</sub>

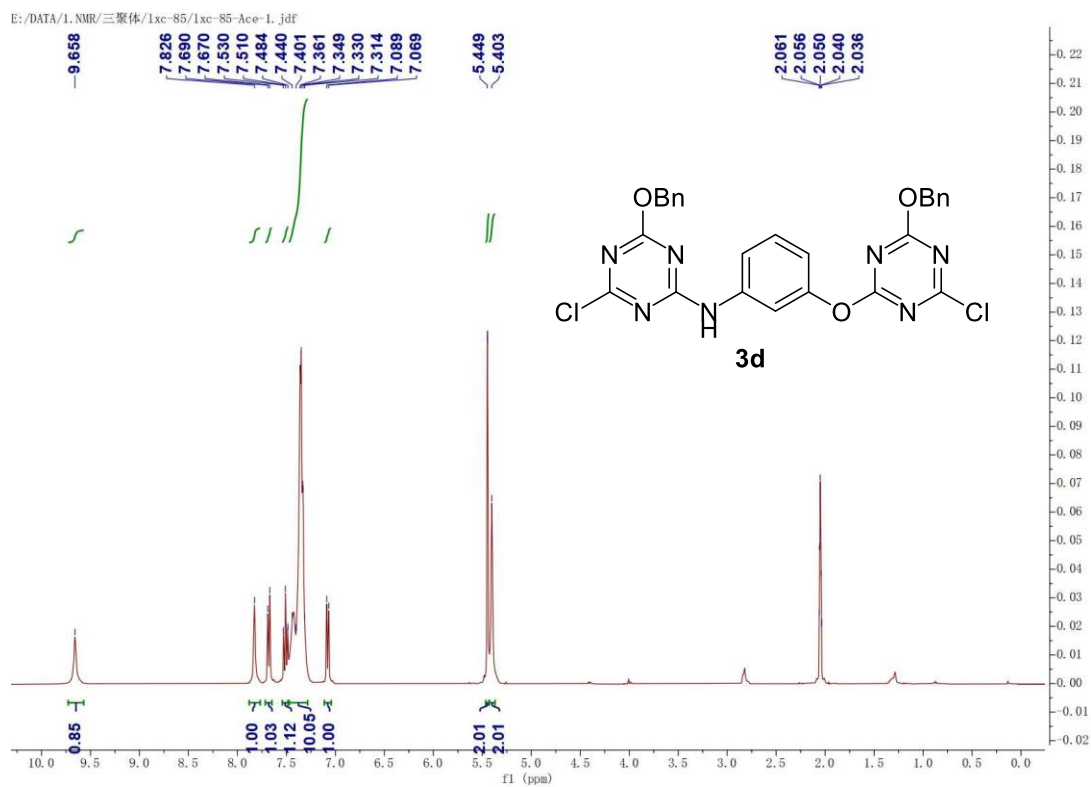

**3d**: <sup>13</sup>C NMR, 100 MHz, acetone-*d*<sub>6</sub>

E:/DATA/1.NMR/三聚体/lxc-85/lxc-85-Ace-C-1.jdf

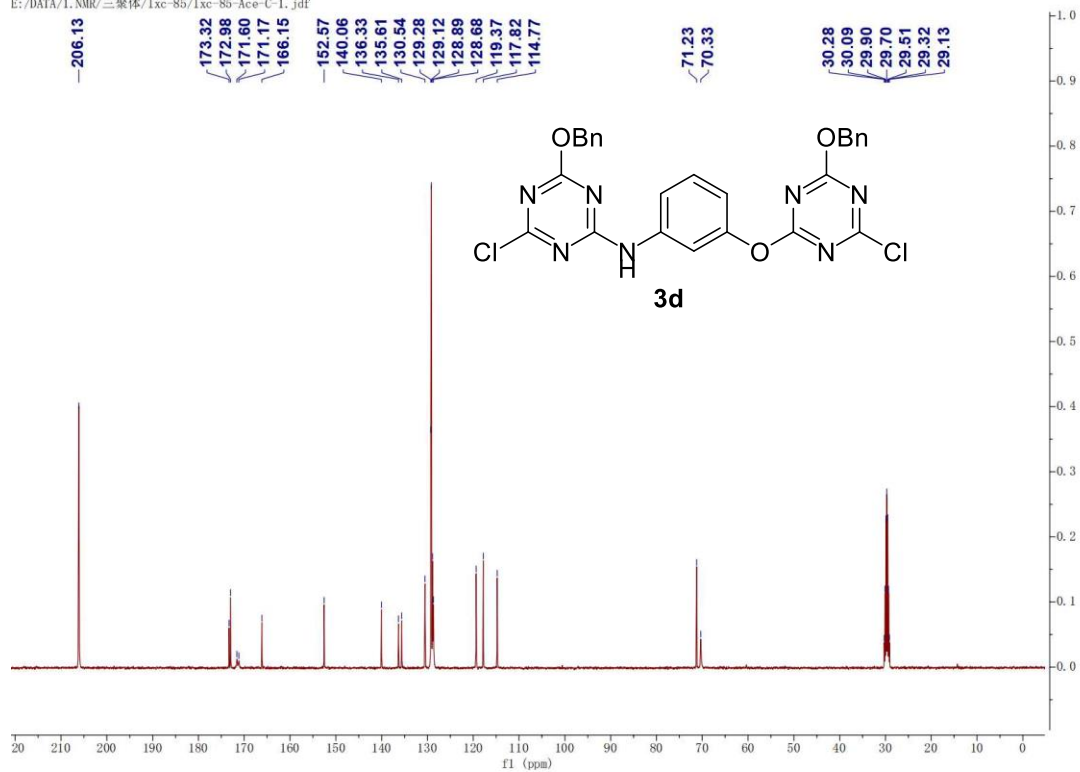

**3e**: <sup>1</sup>H NMR, 400 MHz, acetone-*d*<sub>6</sub>

lxc-277-4-2 — single\_pulse

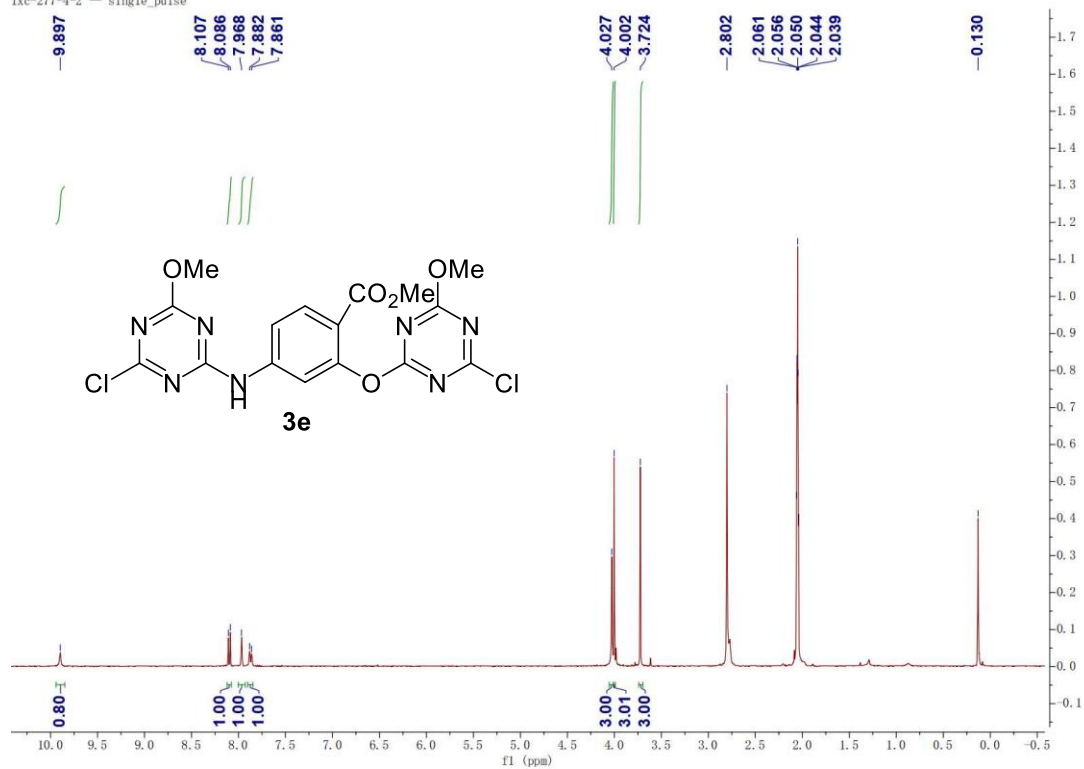

**3e**: <sup>13</sup>C NMR, 100 MHz, DMSO-*d*<sub>6</sub>

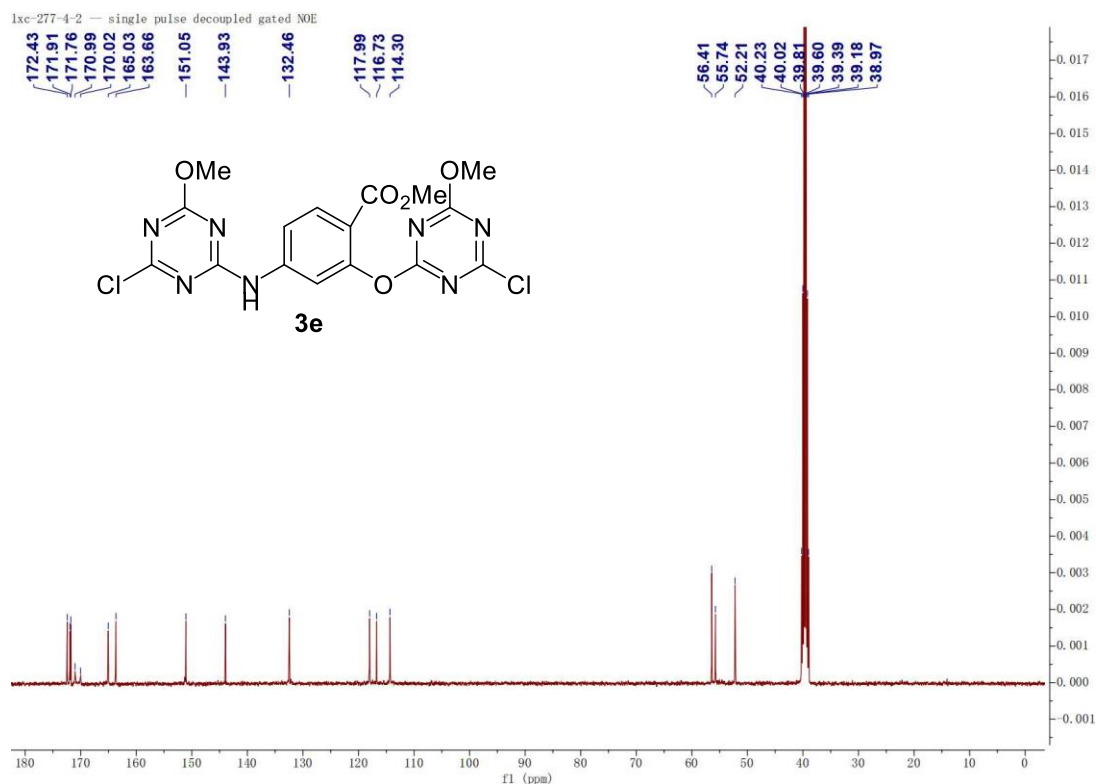

**3f**:  $^1\text{H}$  NMR, 400 MHz, acetone- $d_6$

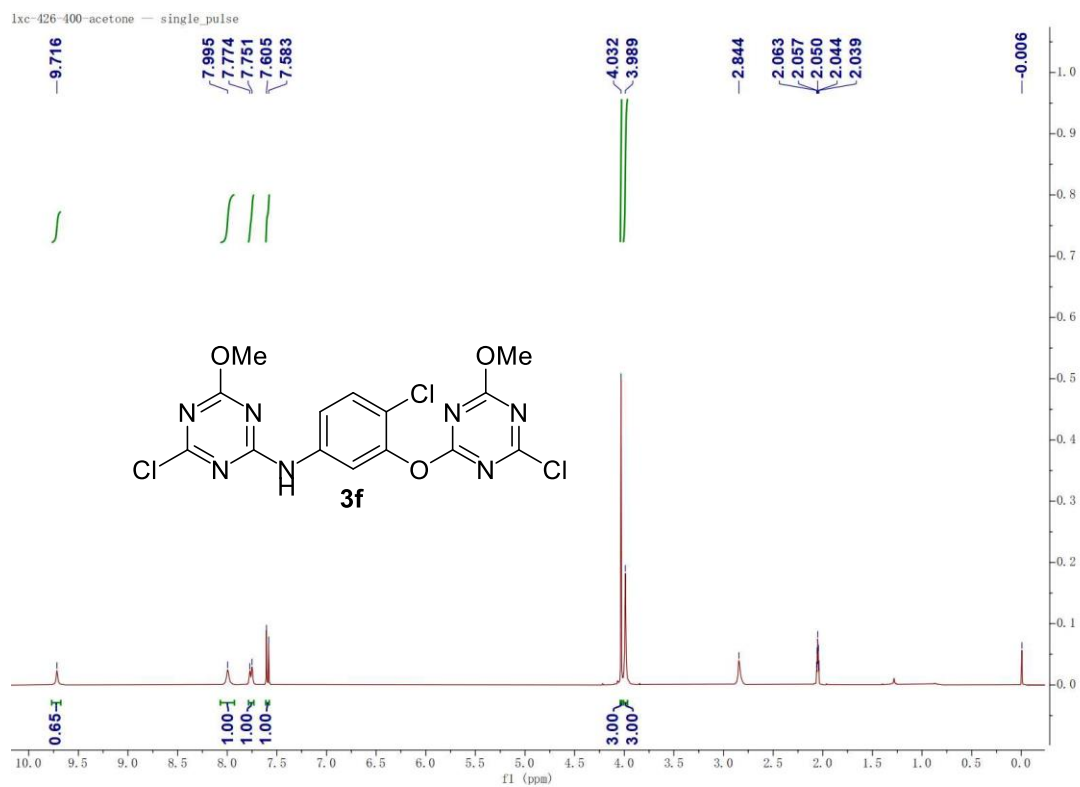

**3f**:  $^{13}\text{C}$  NMR, 150 MHz, DMSO- $d_6$

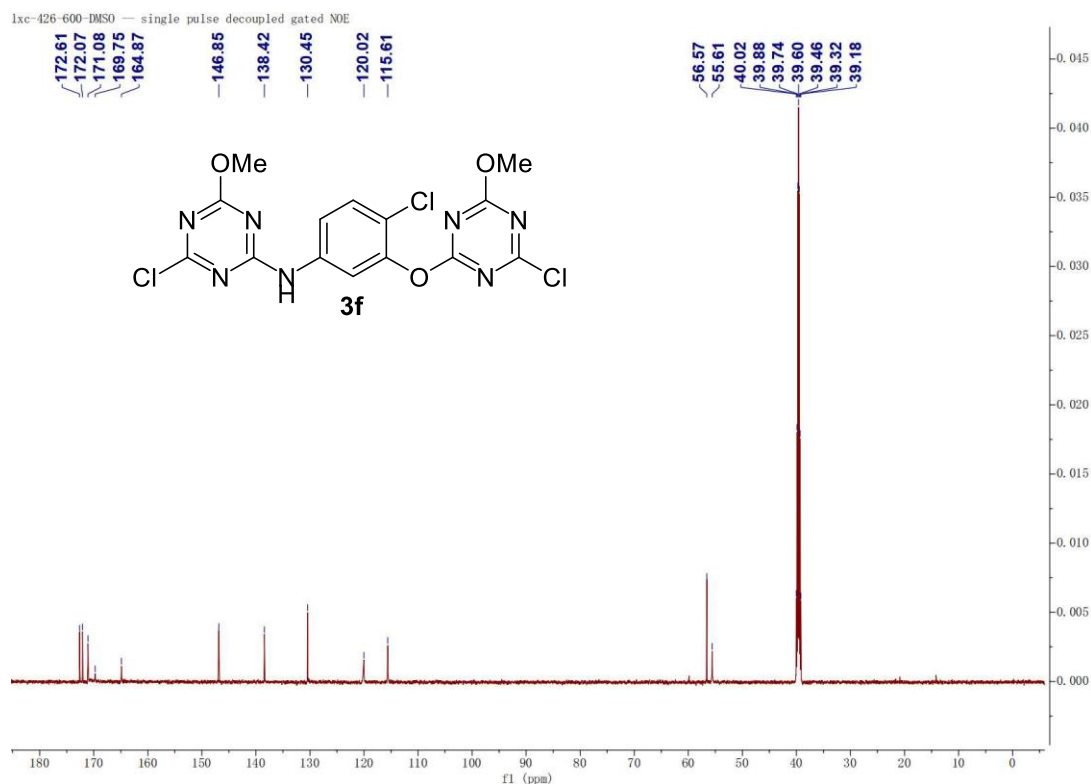

**3g**:  $^1\text{H}$  NMR, 400 MHz, acetone- $d_6$

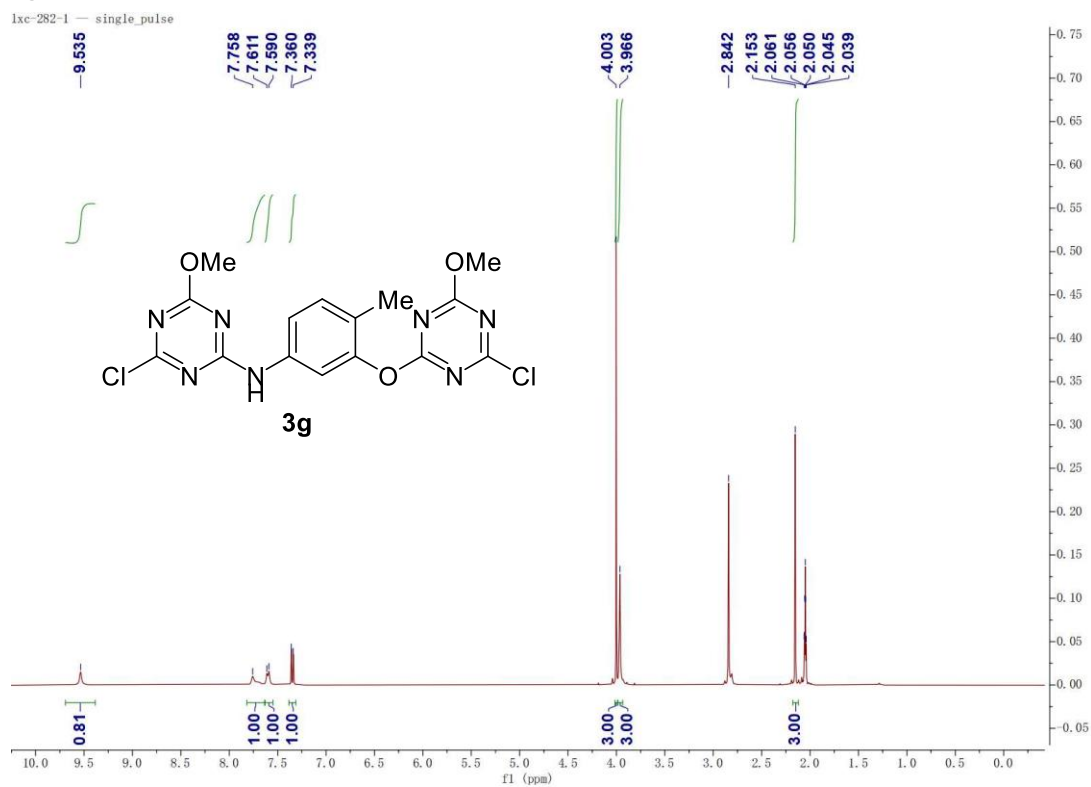

**3g**:  $^{13}\text{C}$  NMR, 100 MHz, acetone- $d_6$

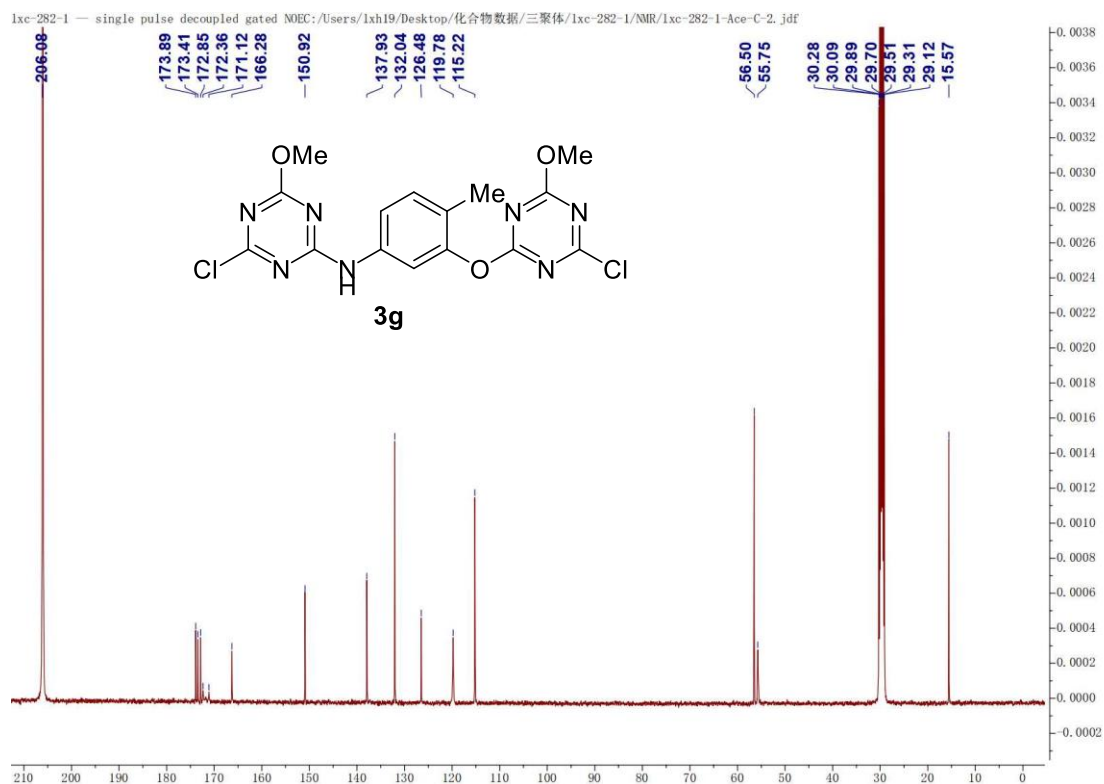

**3h**: <sup>1</sup>H NMR, 400 MHz, acetone-*d*<sub>6</sub>

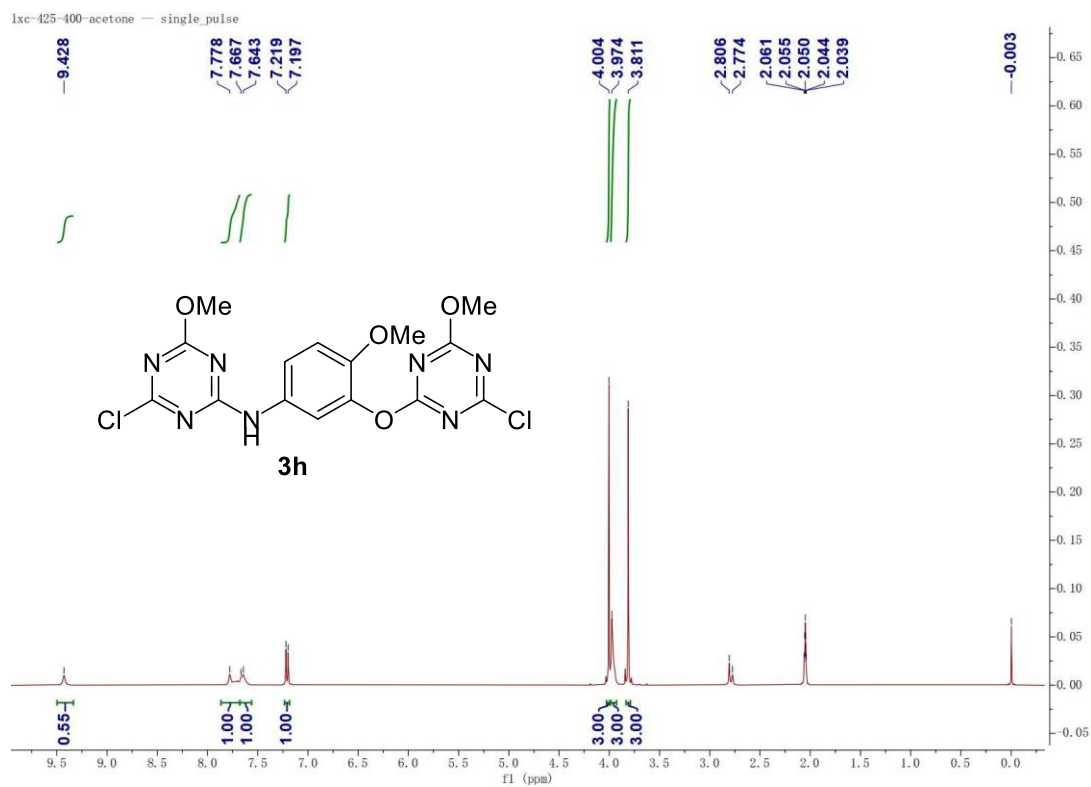

**3h**: <sup>13</sup>C NMR, 150 MHz, DMSO-*d*<sub>6</sub>, 60 °C

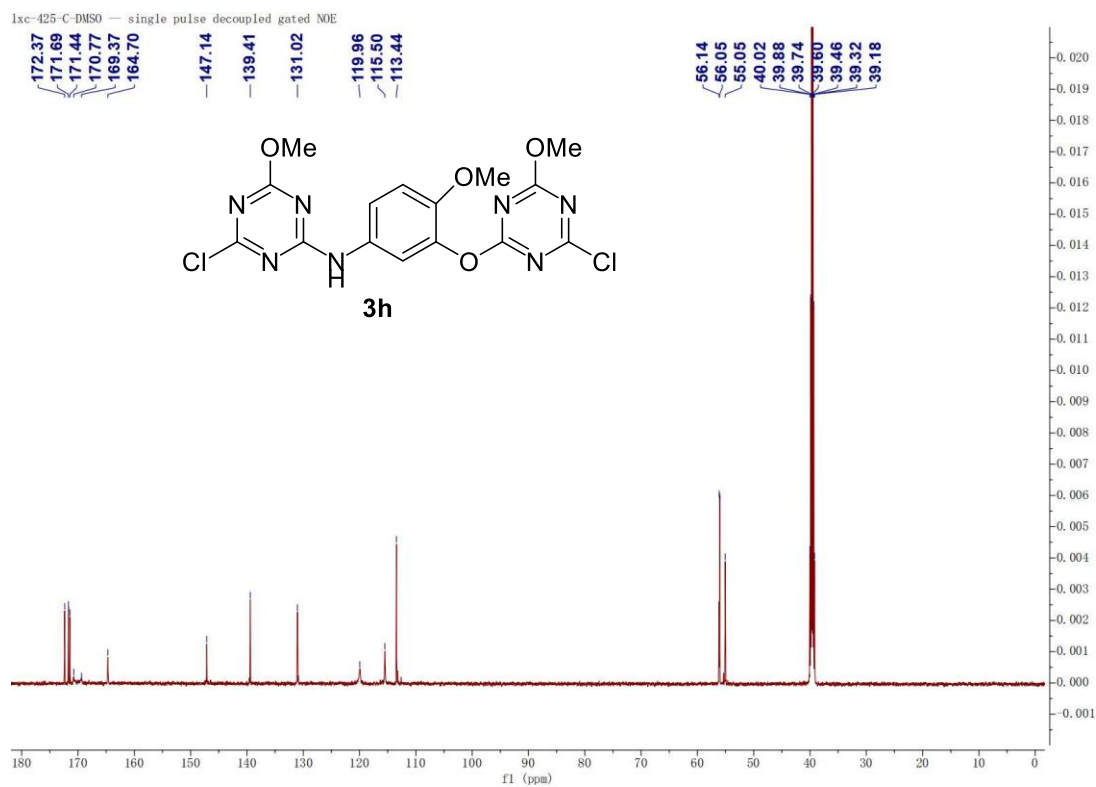

**3i:**  $^1\text{H}$  NMR, 400 MHz, acetone- $d_6$

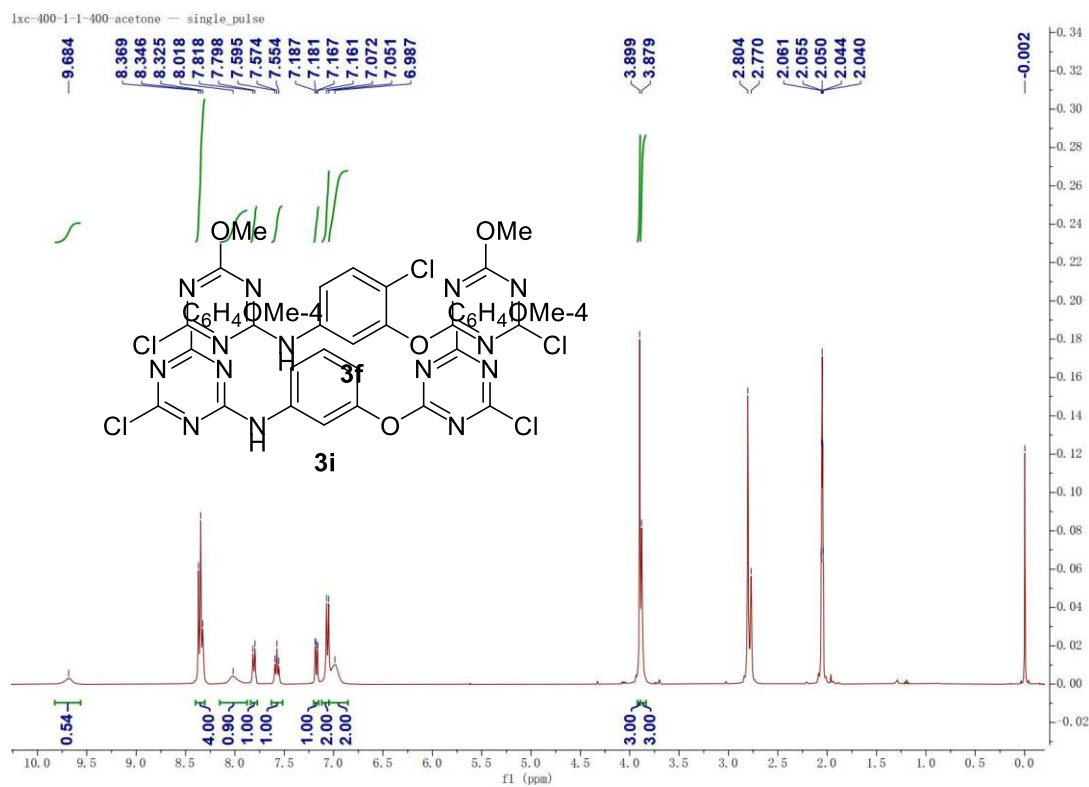

**3i:**  $^{13}\text{C}$  NMR, 150 MHz, acetone- $d_6$

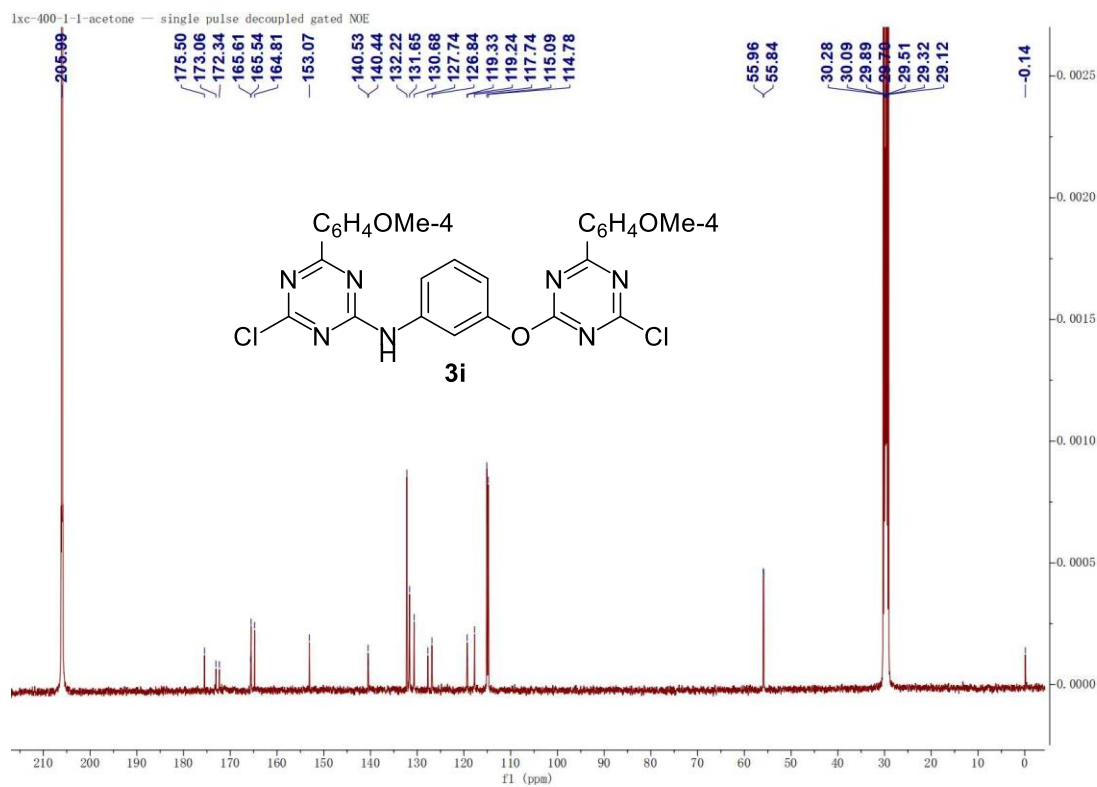

**3j**:  $^1\text{H}$  NMR, 400 MHz, acetone- $d_6$

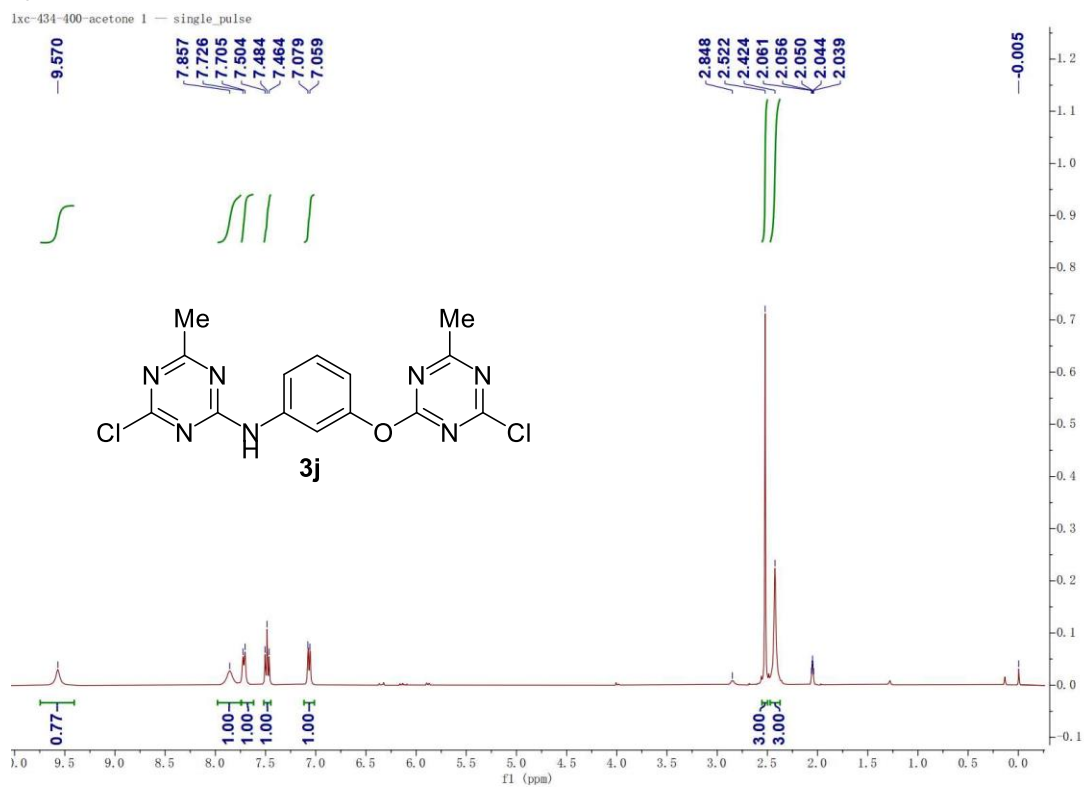

**3j**:  $^{13}\text{C}$  NMR, 150 MHz, benzene- $d_6$

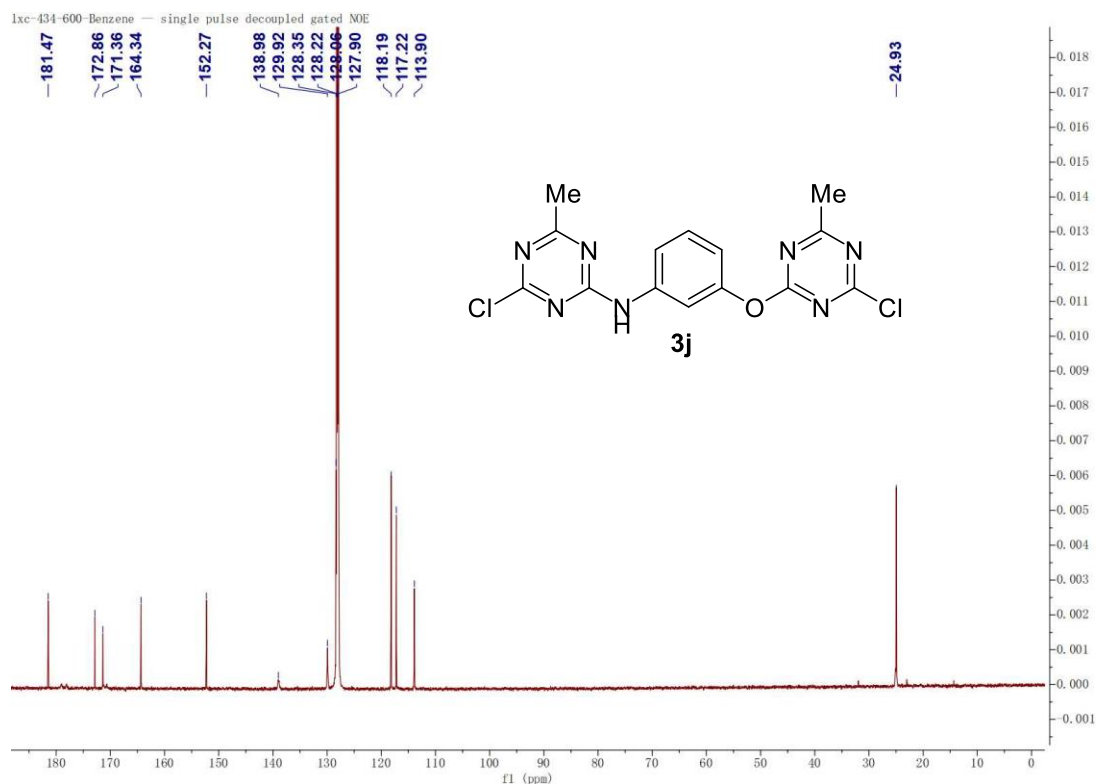

**IIa:**  $^1\text{H}$  NMR, 600 MHz,  $\text{CDCl}_3$

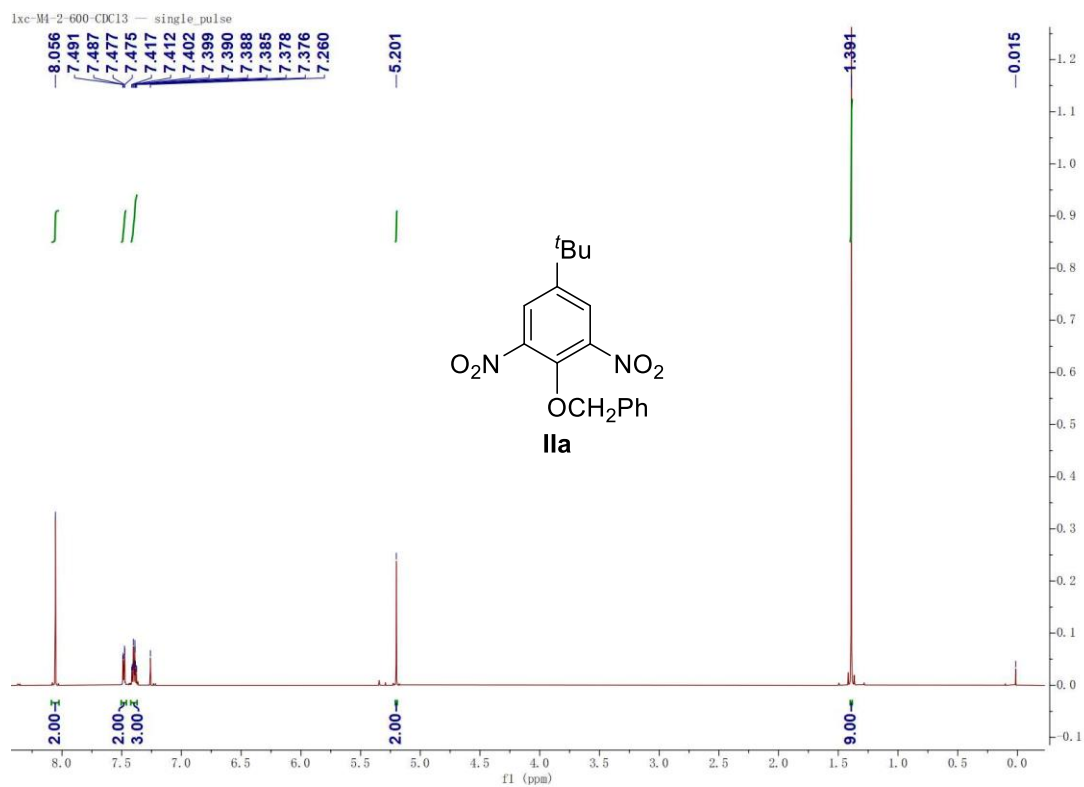

**IIa:**  $^{13}\text{C}$  NMR, 150 MHz,  $\text{CDCl}_3$

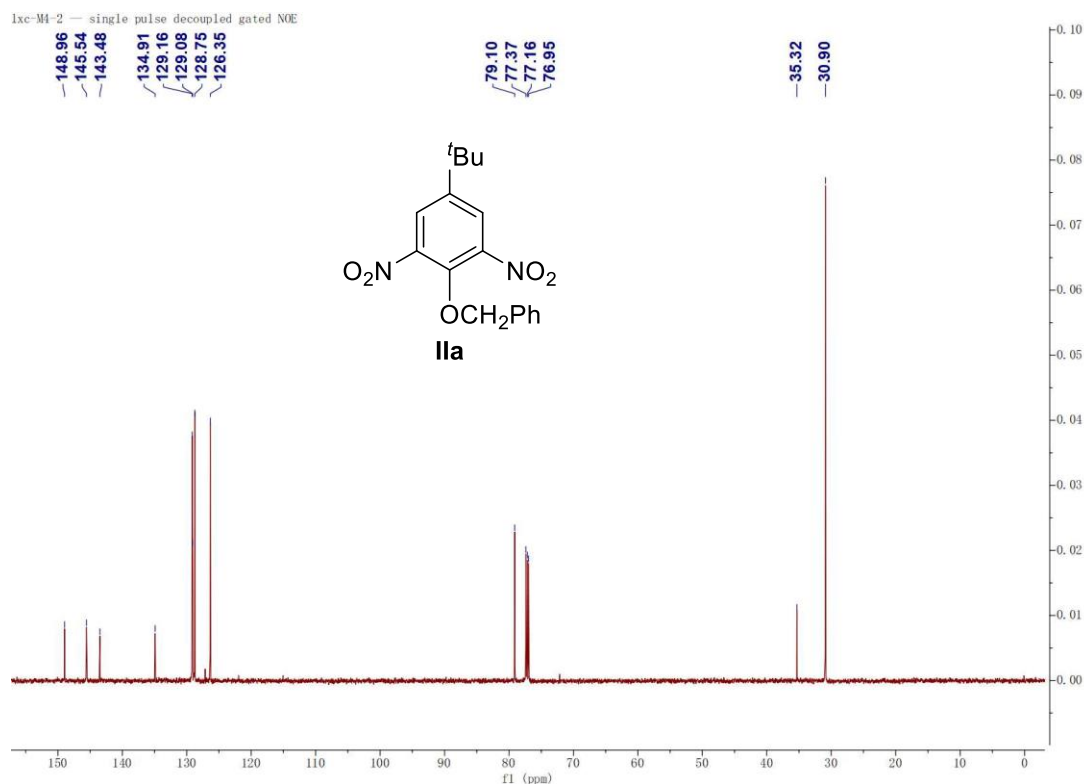

**IIb**:  $^1\text{H}$  NMR, 600 MHz,  $\text{CDCl}_3$

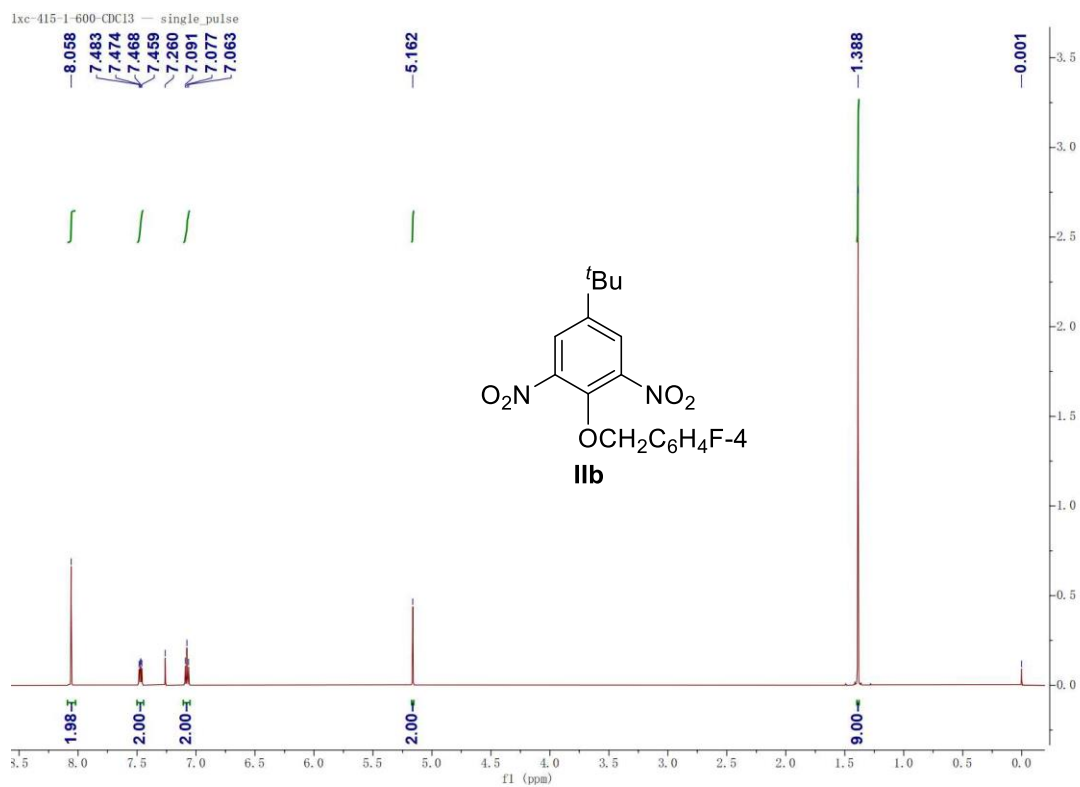

**IIb**:  $^{13}\text{C}$  NMR, 150 MHz,  $\text{CDCl}_3$

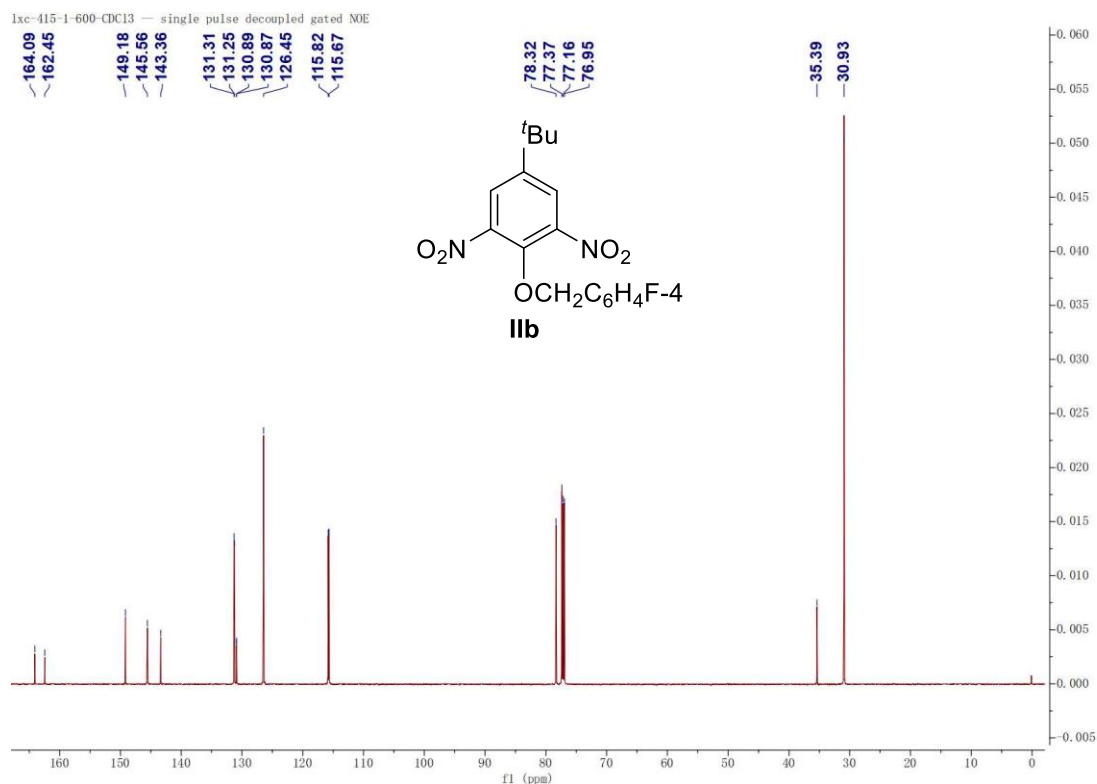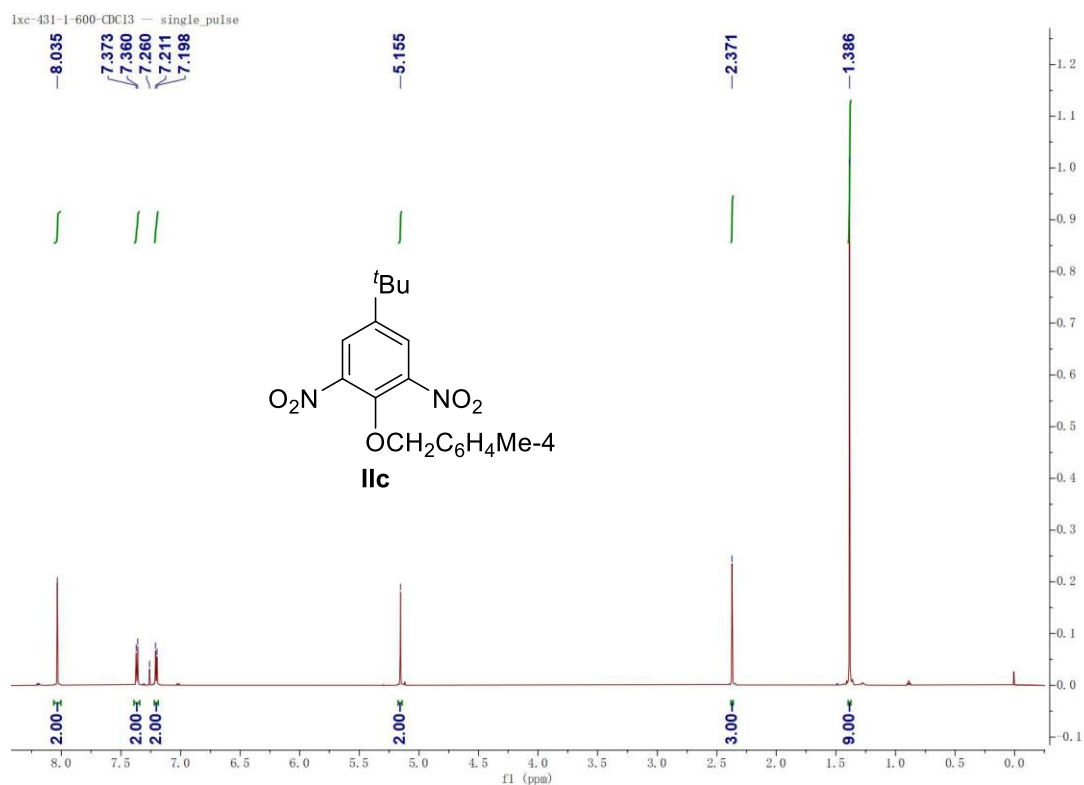

**IIc**: <sup>13</sup>C NMR, 150 MHz, CDCl<sub>3</sub>

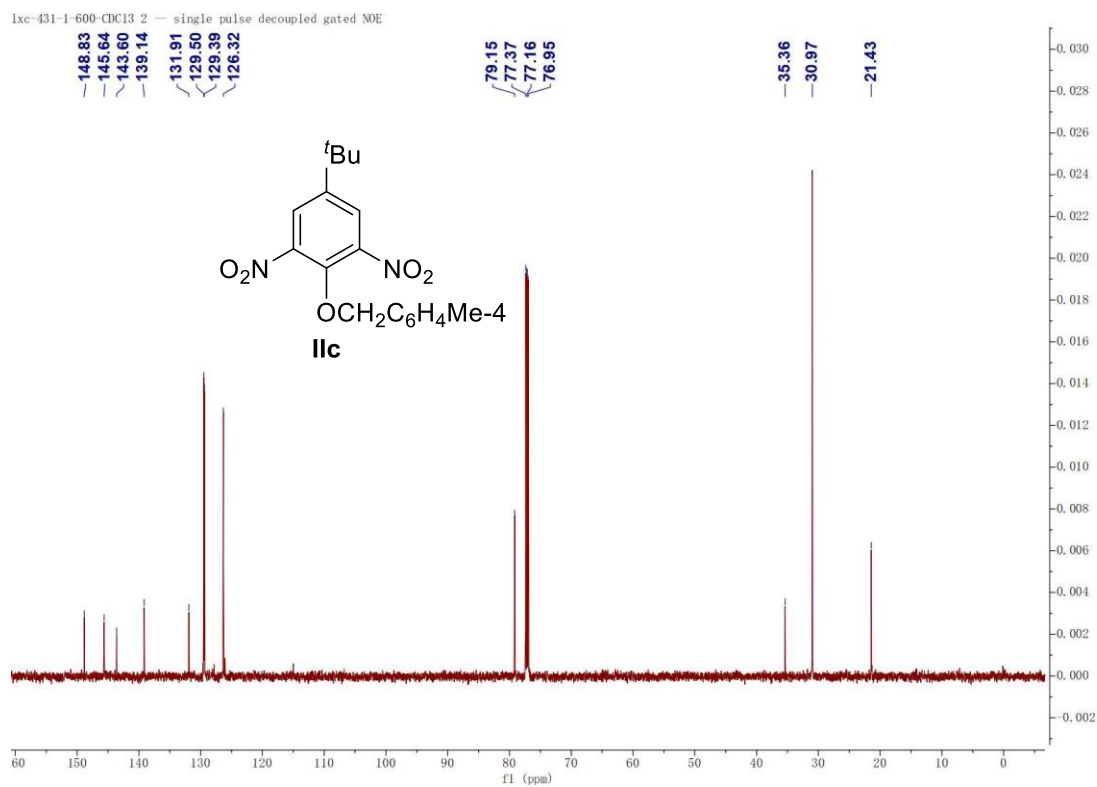

**IIIa**:  $^1\text{H}$  NMR, 600 MHz,  $\text{CDCl}_3$

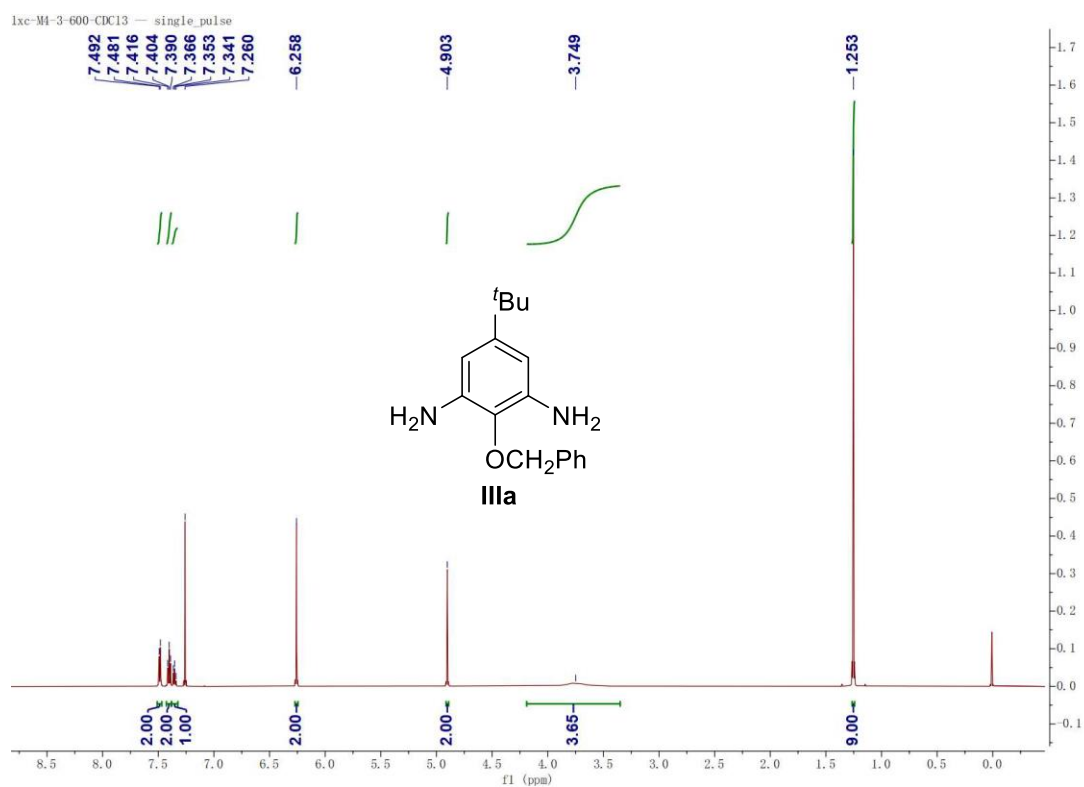

**IIIa:**  $^{13}\text{C}$  NMR, 150 MHz,  $\text{CDCl}_3$

lxc-M4-3-600- $\text{CDCl}_3$  — single pulse decoupled gated NOE

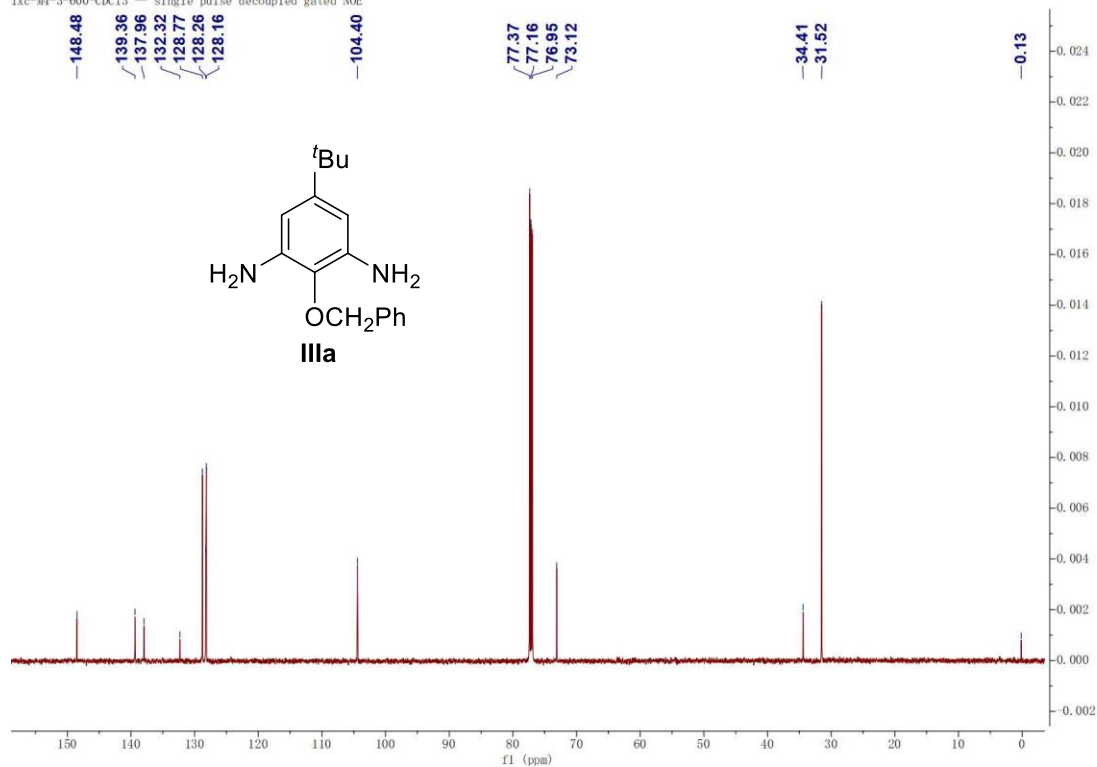

**IIIb:**  $^1\text{H}$  NMR, 600 MHz,  $\text{CDCl}_3$

lxc-415-2-600- $\text{CDCl}_3$  — single\_pulse

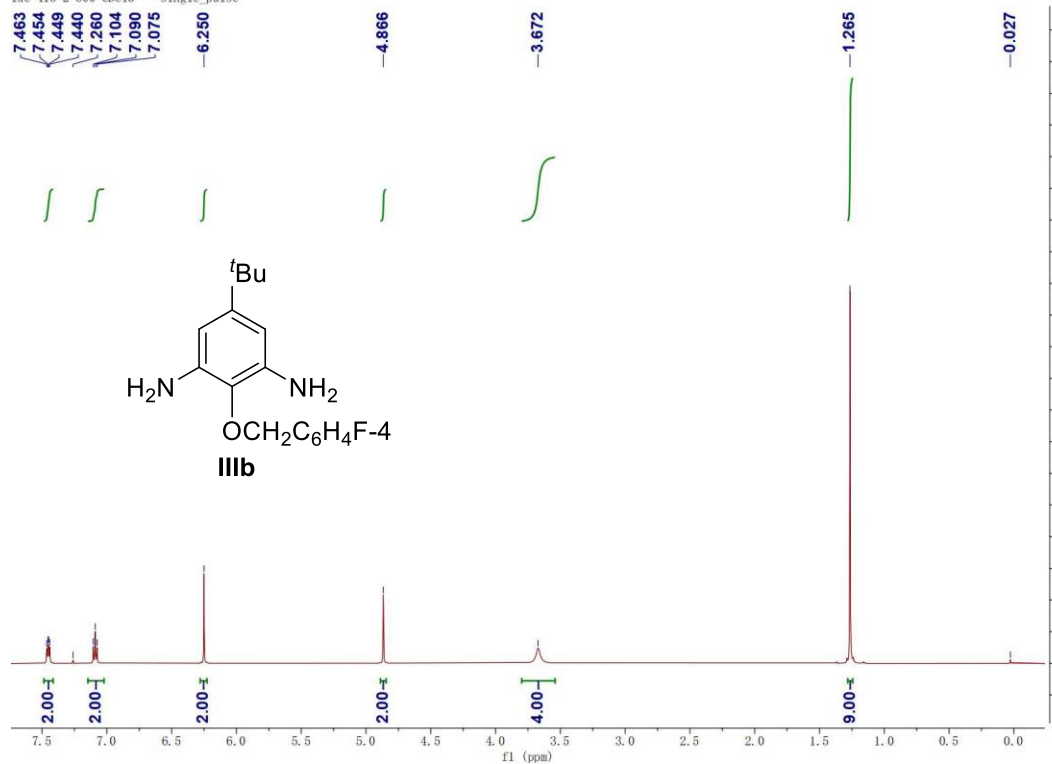

**IIIb:**  $^{13}\text{C}$  NMR, 100 MHz,  $\text{CDCl}_3$

lxc-415-2-600- $\text{CDCl}_3$  — single pulse decoupled gated NOE

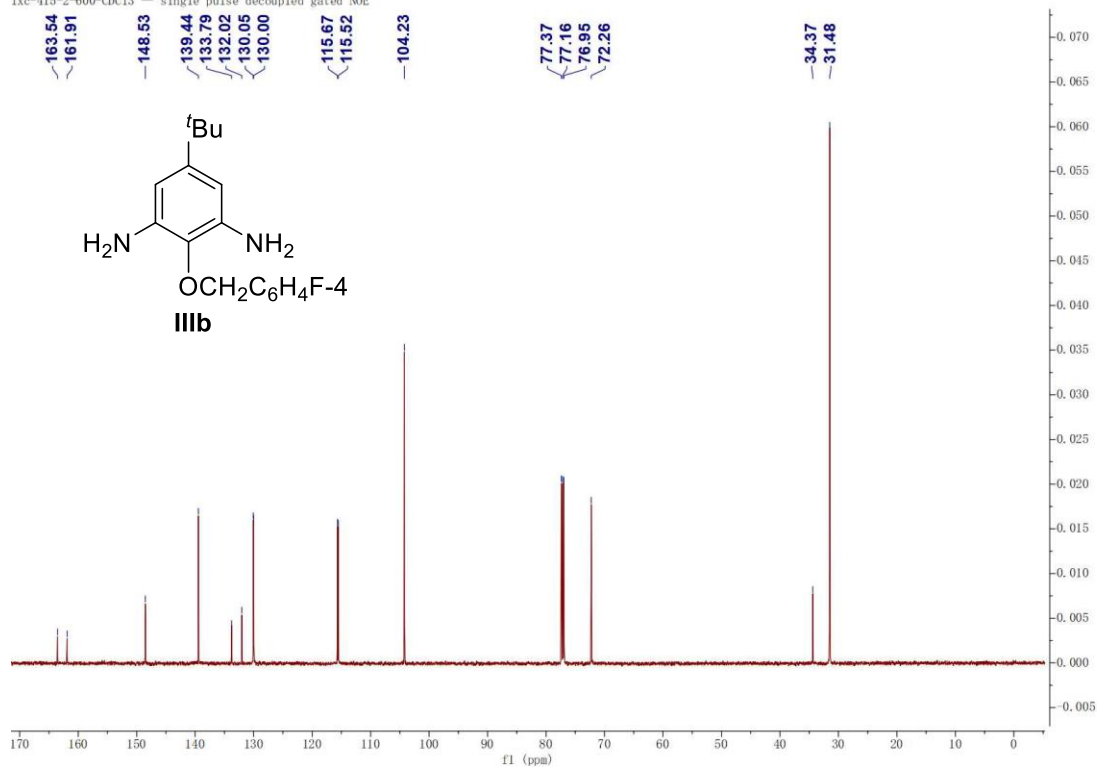

**IIIc:**  $^1\text{H}$  NMR, 600 MHz,  $\text{CDCl}_3$

lxc-431-2-600- $\text{CDCl}_3$  — single\_pulse

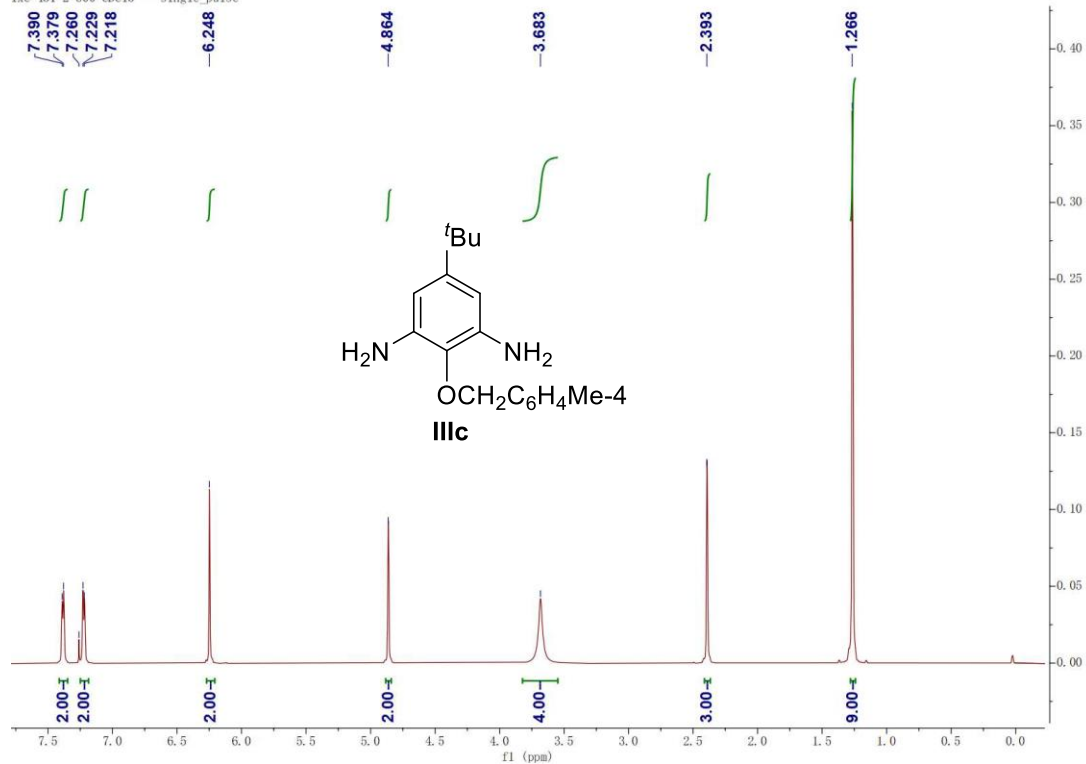

**IIIc:**  $^{13}\text{C}$  NMR, 150 MHz,  $\text{CDCl}_3$

1xc-431-2-600- $\text{CDCl}_3$  — single pulse decoupled gated NOE

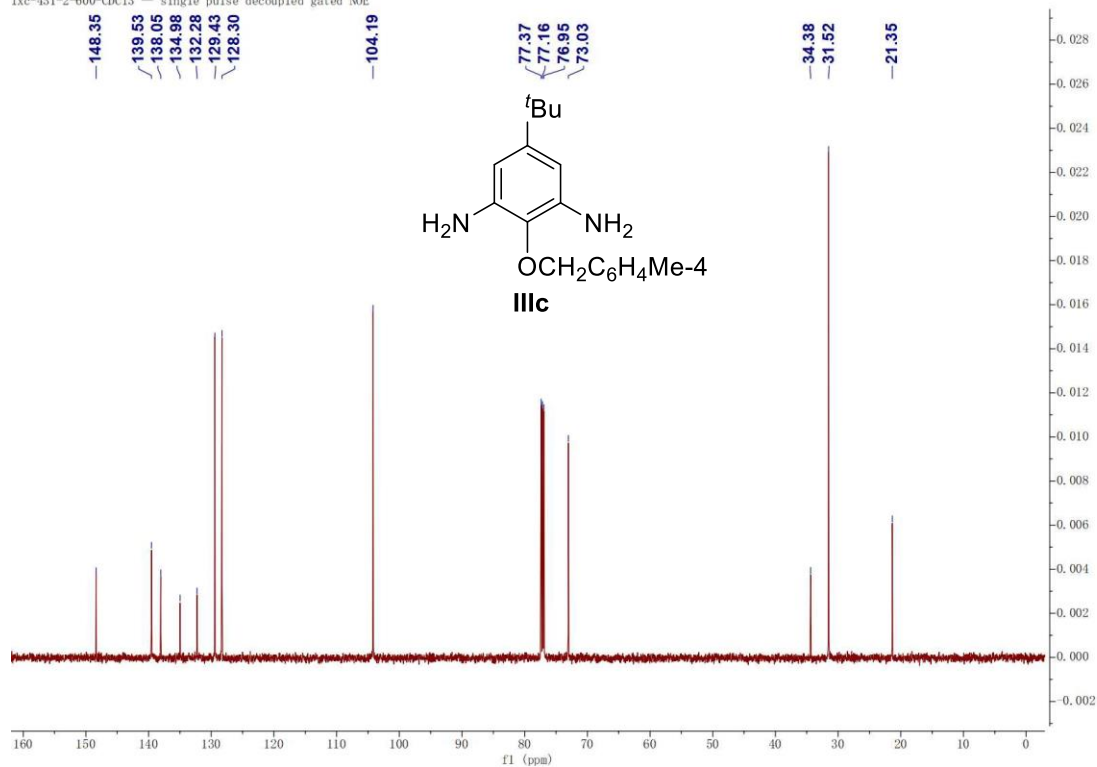

**IVa:**  $^1\text{H}$  NMR, 600 MHz,  $\text{CDCl}_3$

1xc-MH-4-600- $\text{CDCl}_3$  — single pulse

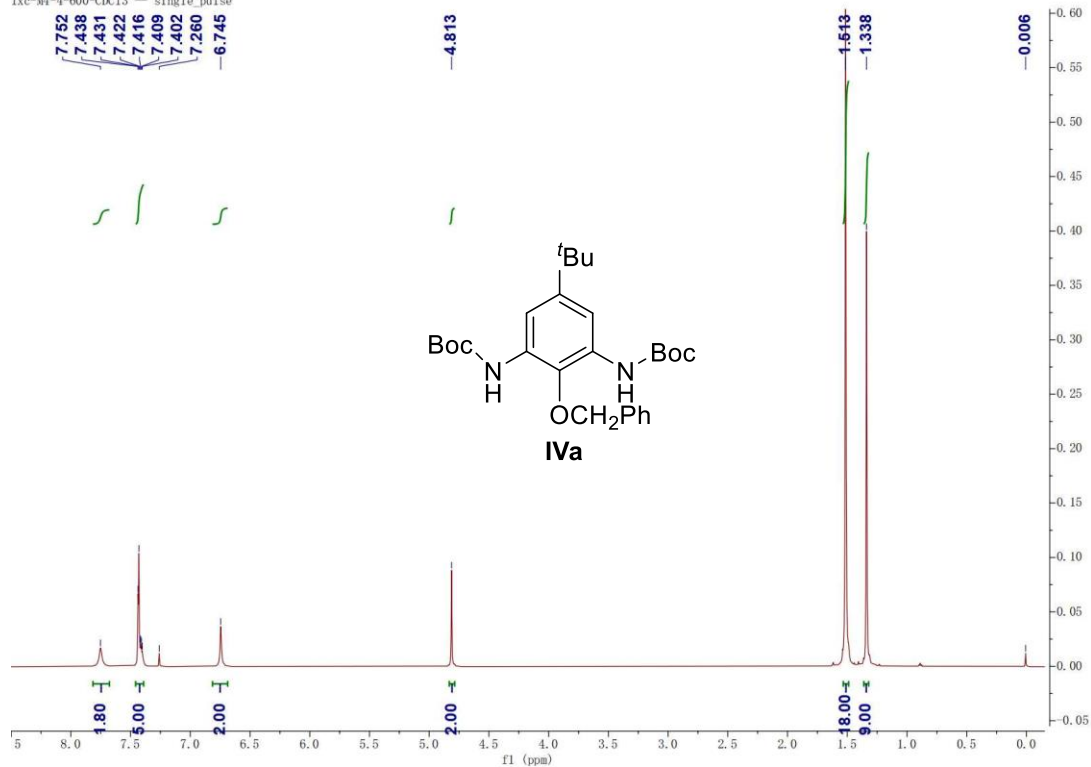

**IVa:**  $^{13}\text{C}$  NMR, 150 MHz,  $\text{CDCl}_3$

lxc-M4-4-600- $\text{CDCl}_3$  — single pulse decoupled gated NOE

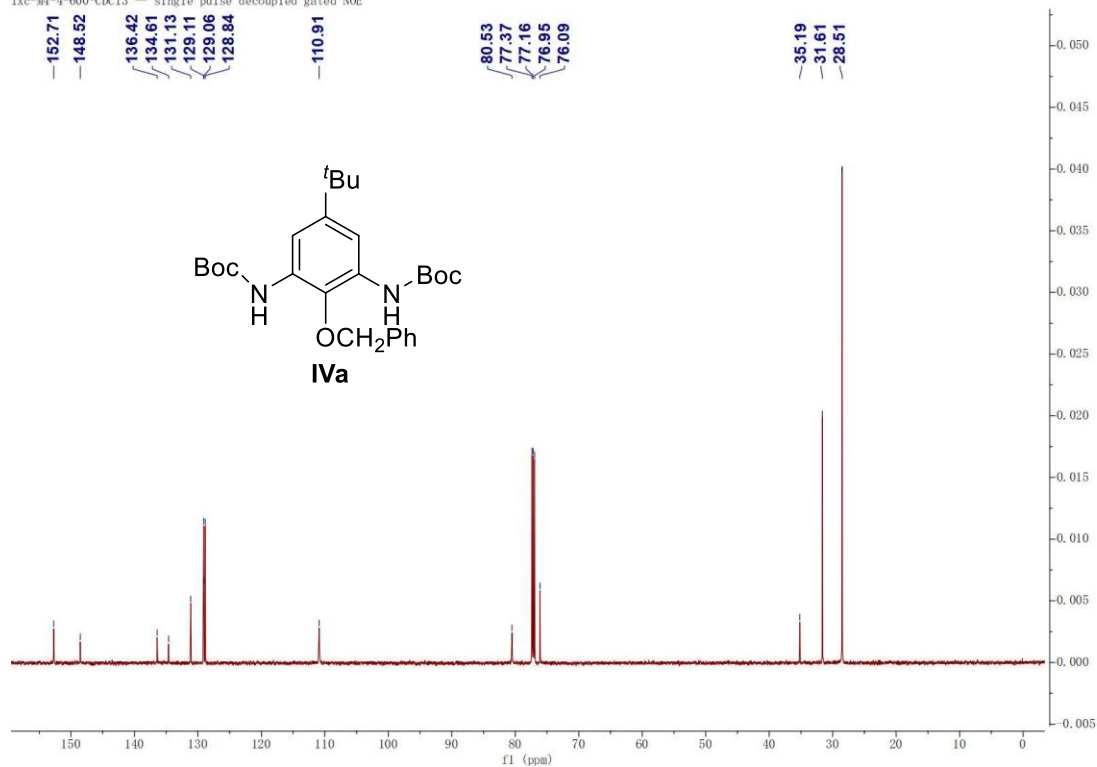

**IVb:**  $^1\text{H}$  NMR, 600 MHz,  $\text{CDCl}_3$

lxc-417-1-600- $\text{CDCl}_3$  — single\_pulse

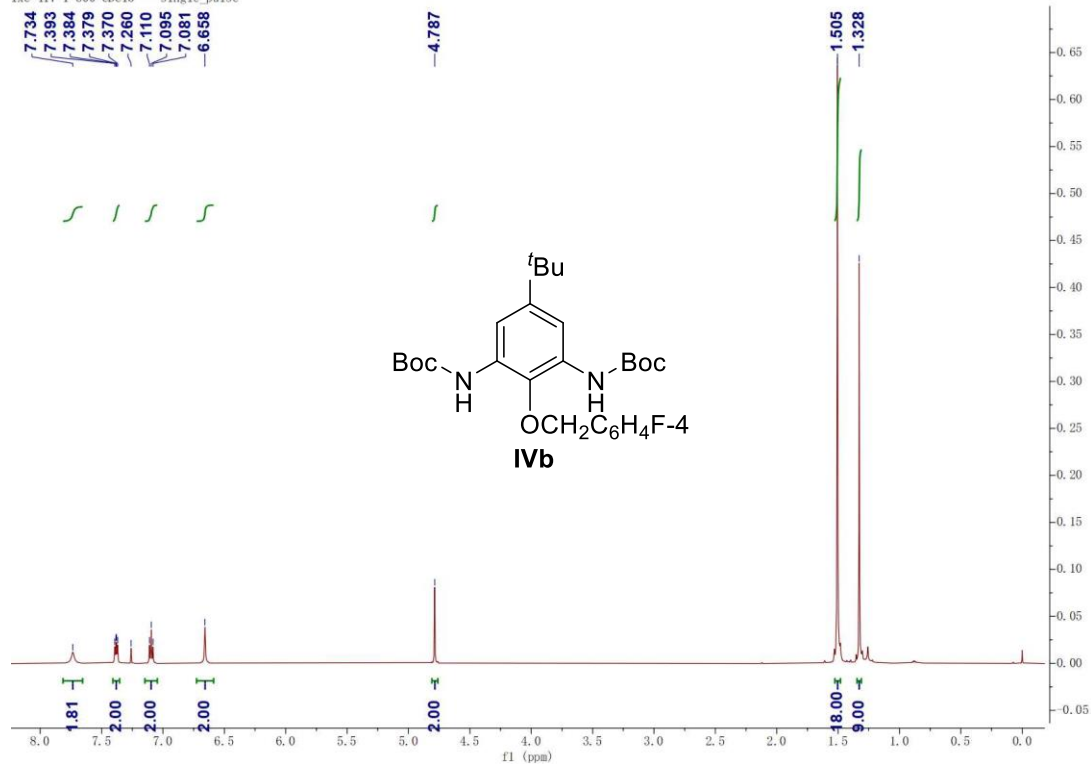

**IVb:**  $^{13}\text{C}$  NMR, 150 MHz,  $\text{CDCl}_3$

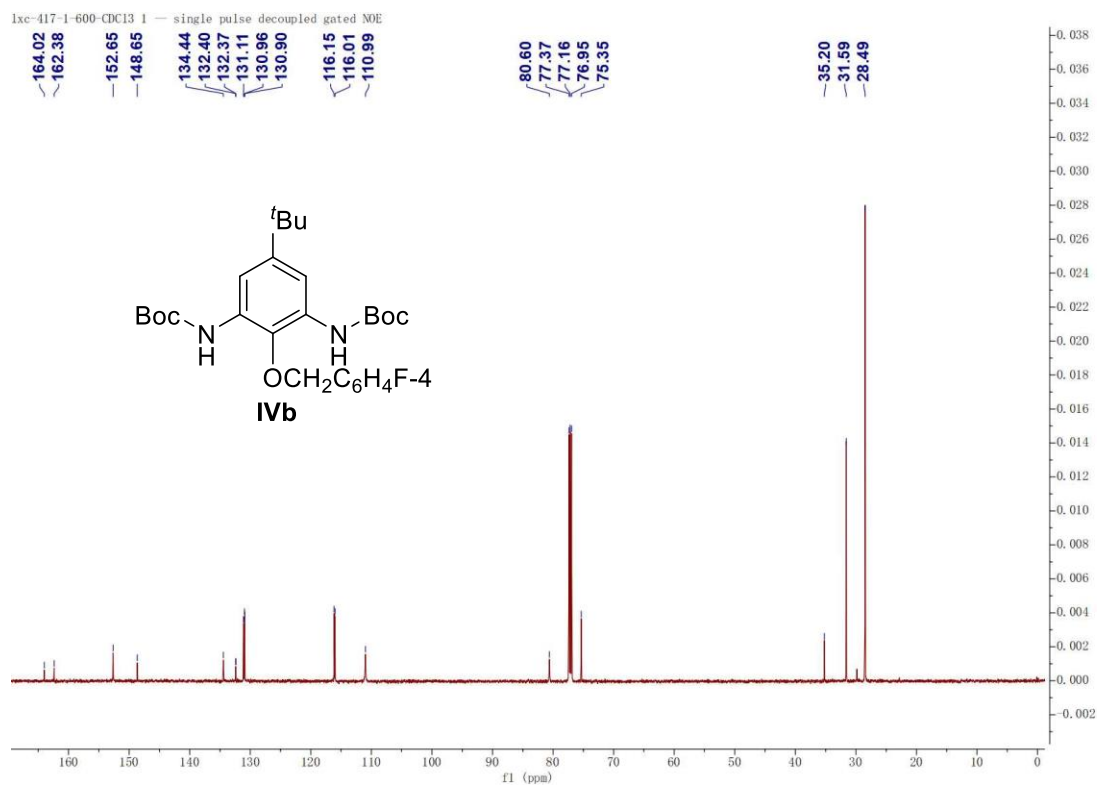

**IVc:**  $^1\text{H}$  NMR, 600 MHz,  $\text{CDCl}_3$

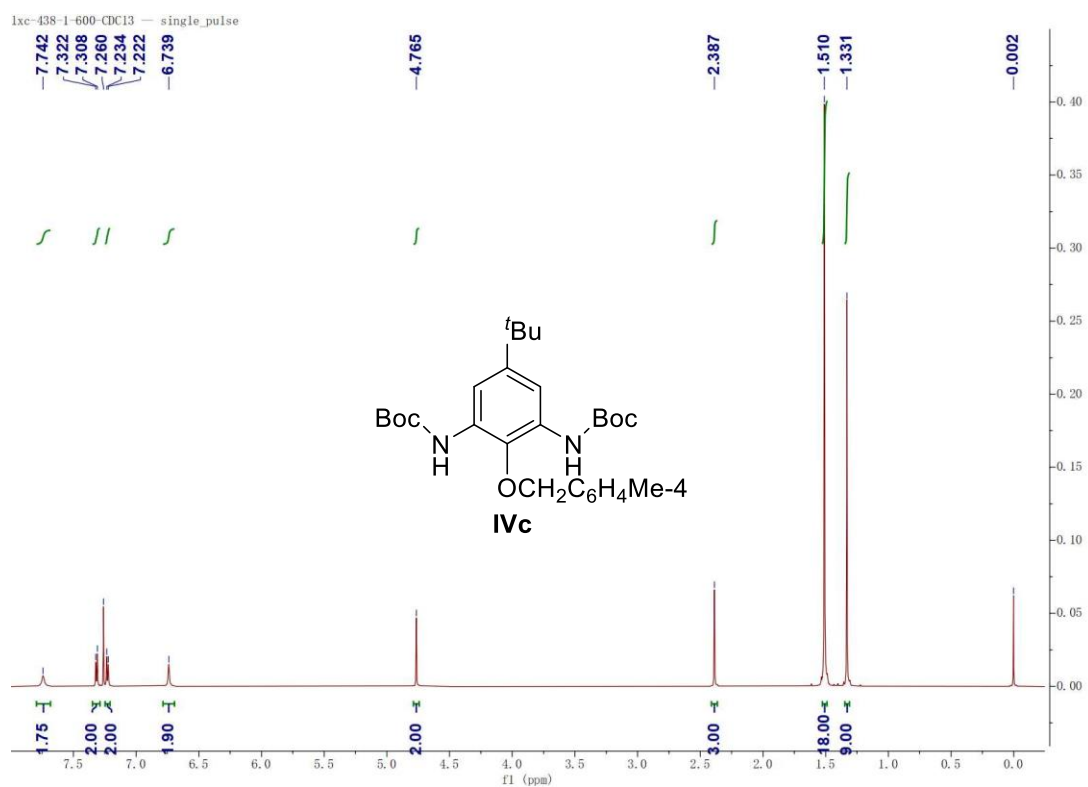

**IVc:**  $^{13}\text{C}$  NMR, 150 MHz,  $\text{CDCl}_3$

lxc-438-1-600- $\text{CDCl}_3$  1 — single pulse decoupled gated NOE

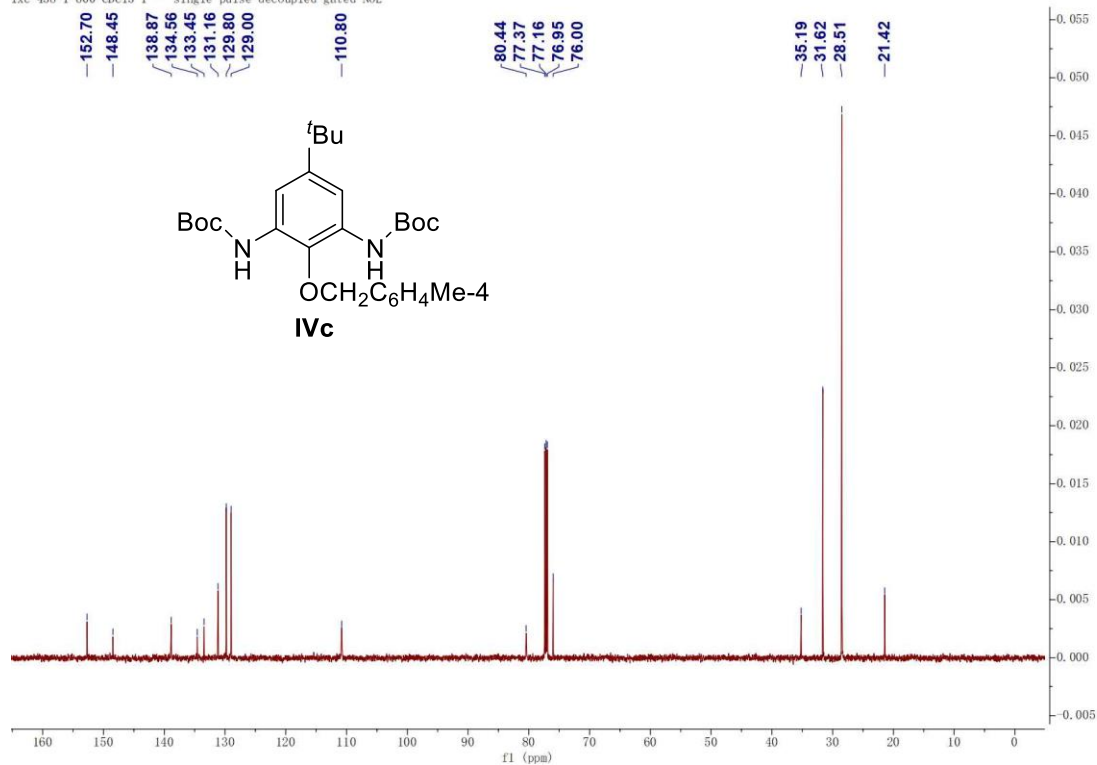

**4a:**  $^1\text{H}$  NMR, 400 MHz,  $\text{CDCl}_3$

lxc-M4-6 — single pulse

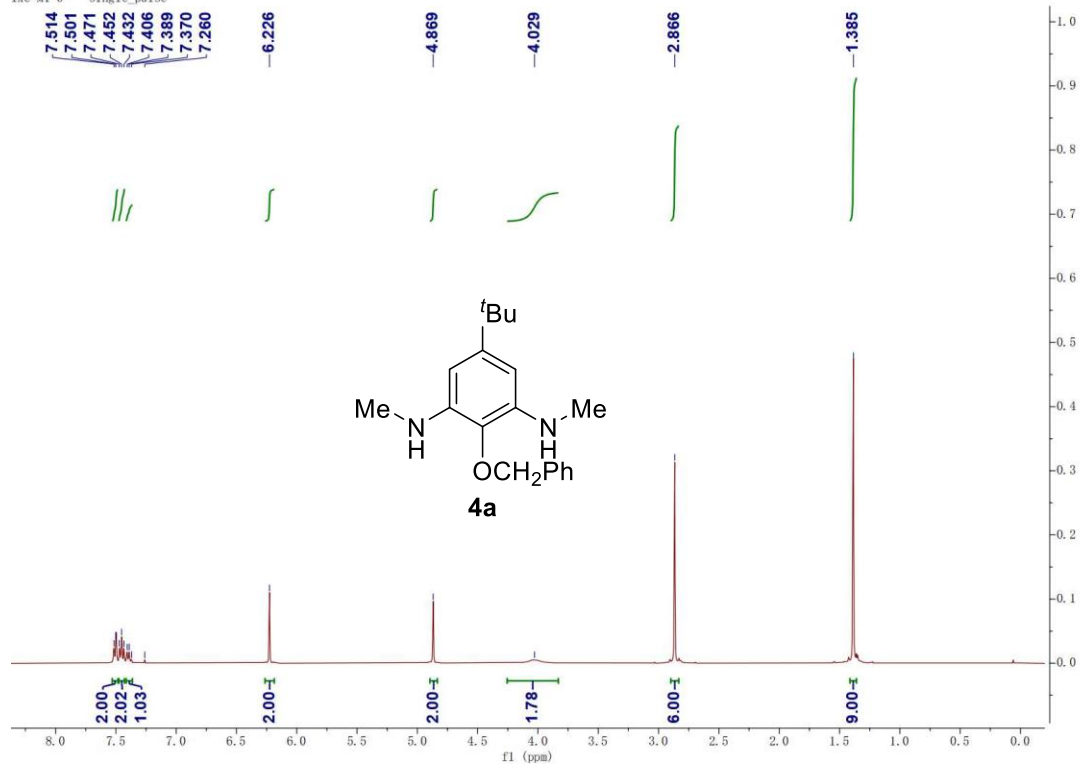

**4a:**  $^{13}\text{C}$  NMR, 100 MHz,  $\text{CDCl}_3$

C:/Users/lxh19/Desktop/化合物数据/单体/lxc-M4-6/lxc-M4-6-CDCl3-C-1.jdf

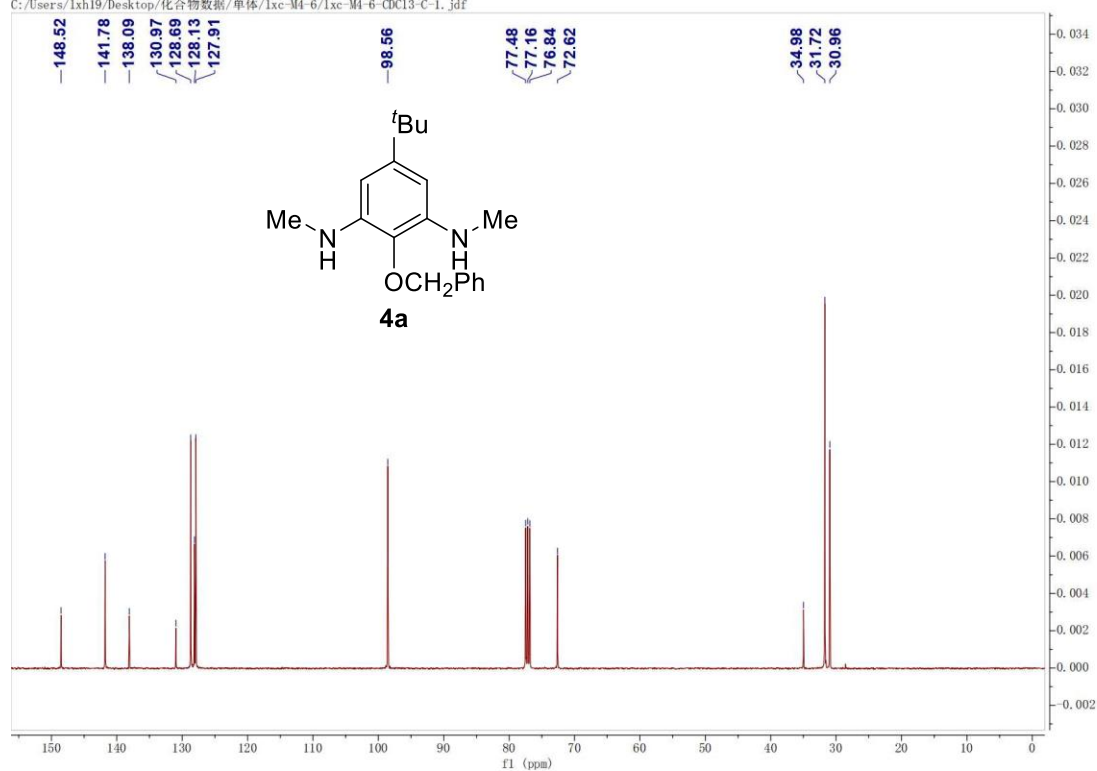

**4b:**  $^1\text{H}$  NMR, 600 MHz,  $\text{CDCl}_3$

lxc-417-3-600-CDCl3 — single\_pulse

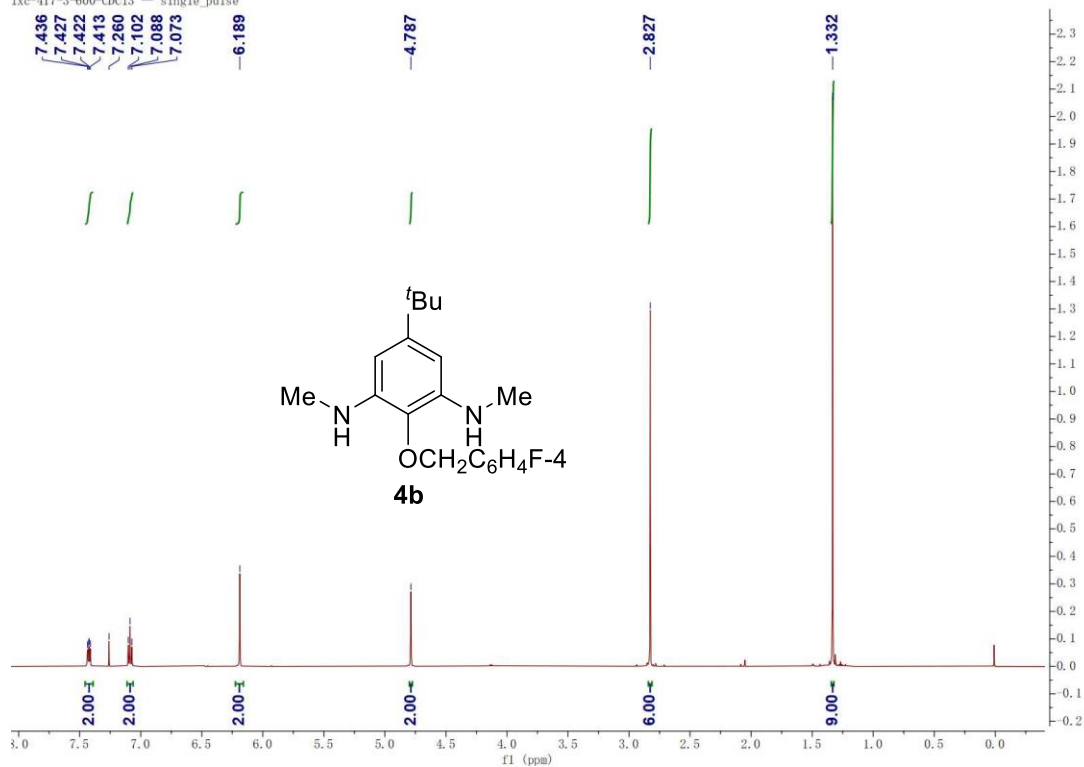

**4b:**  $^{13}\text{C}$  NMR, 150 MHz,  $\text{CDCl}_3$

lxc-417-3-600- $\text{CDCl}_3$  — single pulse decoupled gated NOE

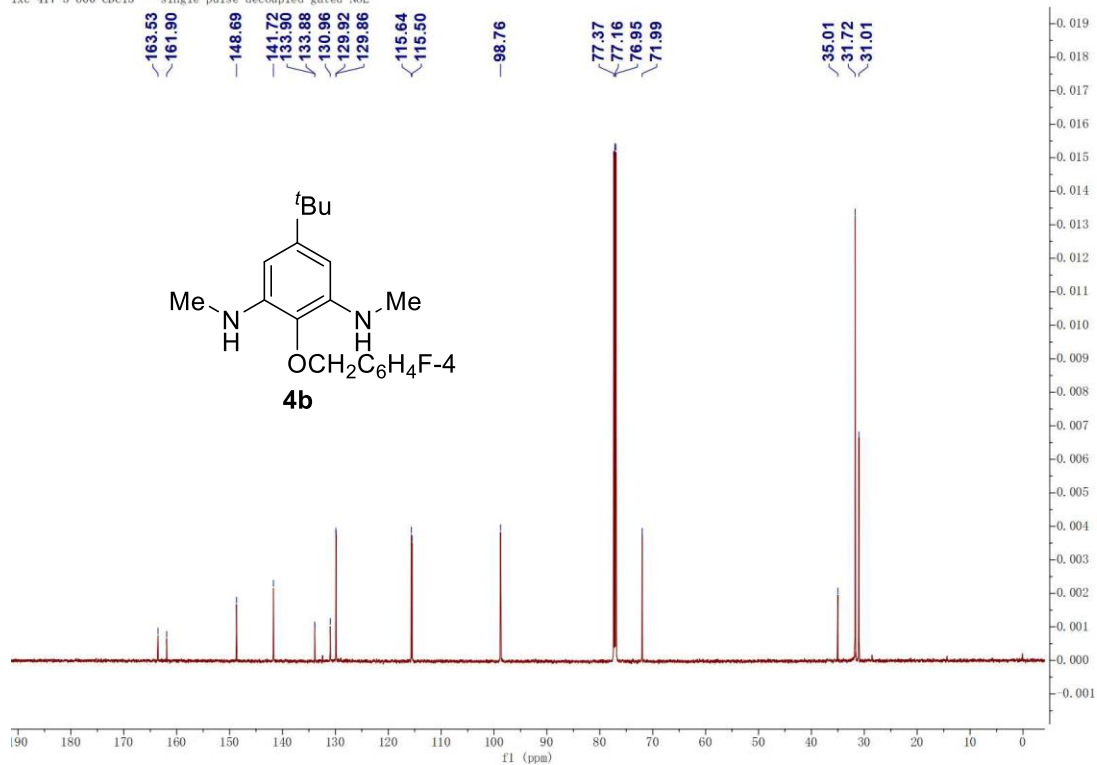

**4c:**  $^1\text{H}$  NMR, 600 MHz,  $\text{CDCl}_3$

lxc-438-3-600- $\text{CDCl}_3$  — single\_pulse

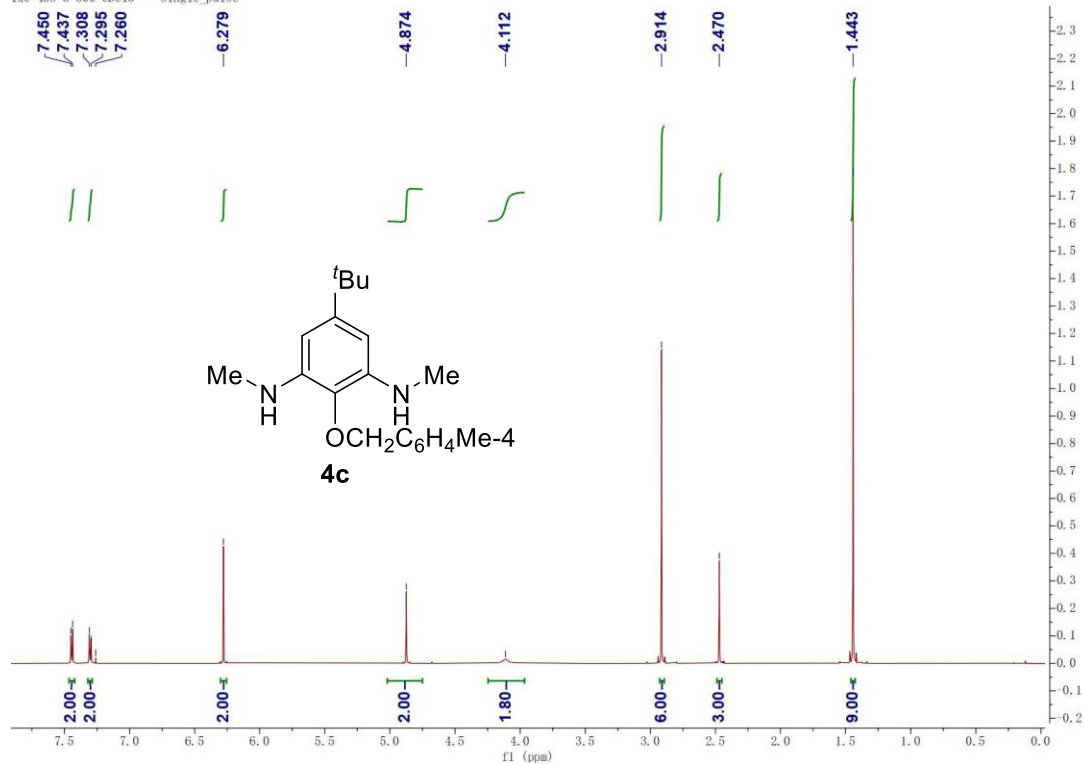

**4c:**  $^{13}\text{C}$  NMR, 150 MHz,  $\text{CDCl}_3$

lxc-438-3-600- $\text{CDCl}_3$  — single pulse decoupled gated NOE

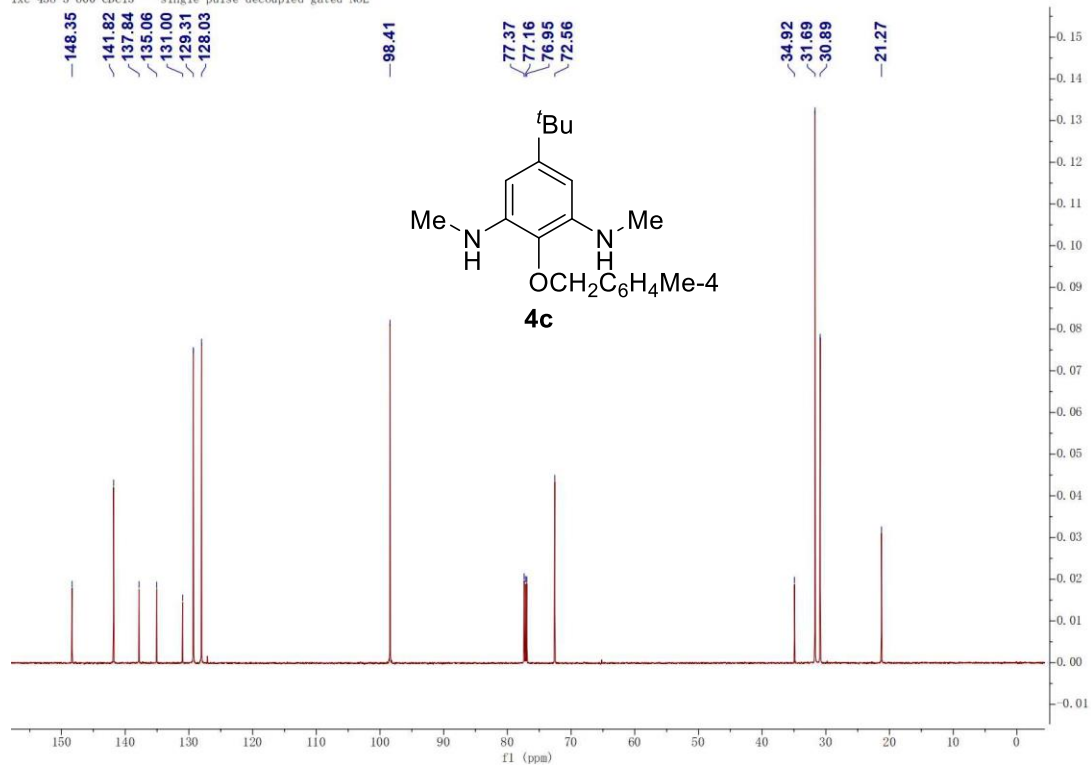

**5a:**  $^1\text{H}$  NMR, 600 MHz,  $\text{CDCl}_3$

S#650565 — single pulse

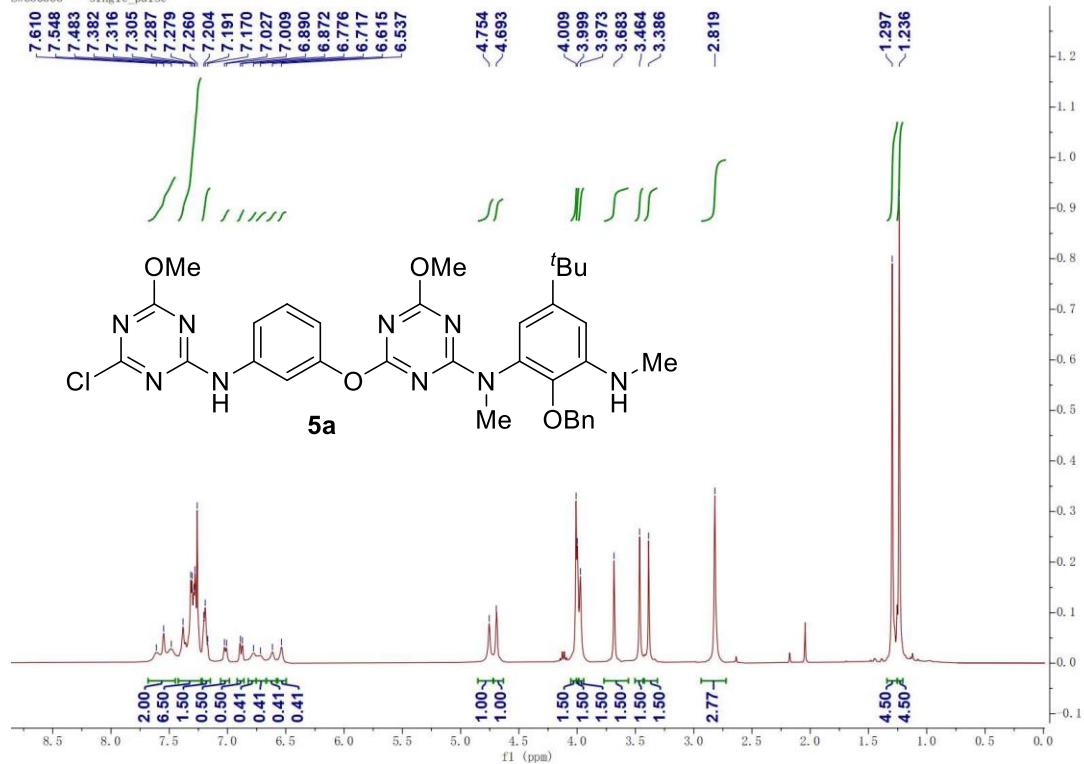

**5a:**  $^{13}\text{C}$  NMR, 100 MHz,  $\text{CDCl}_3$

C:/Users/WMX/Desktop/新建文件夹/1xc-37-1/1xc-37-1-CDCl3-C-1.jdf

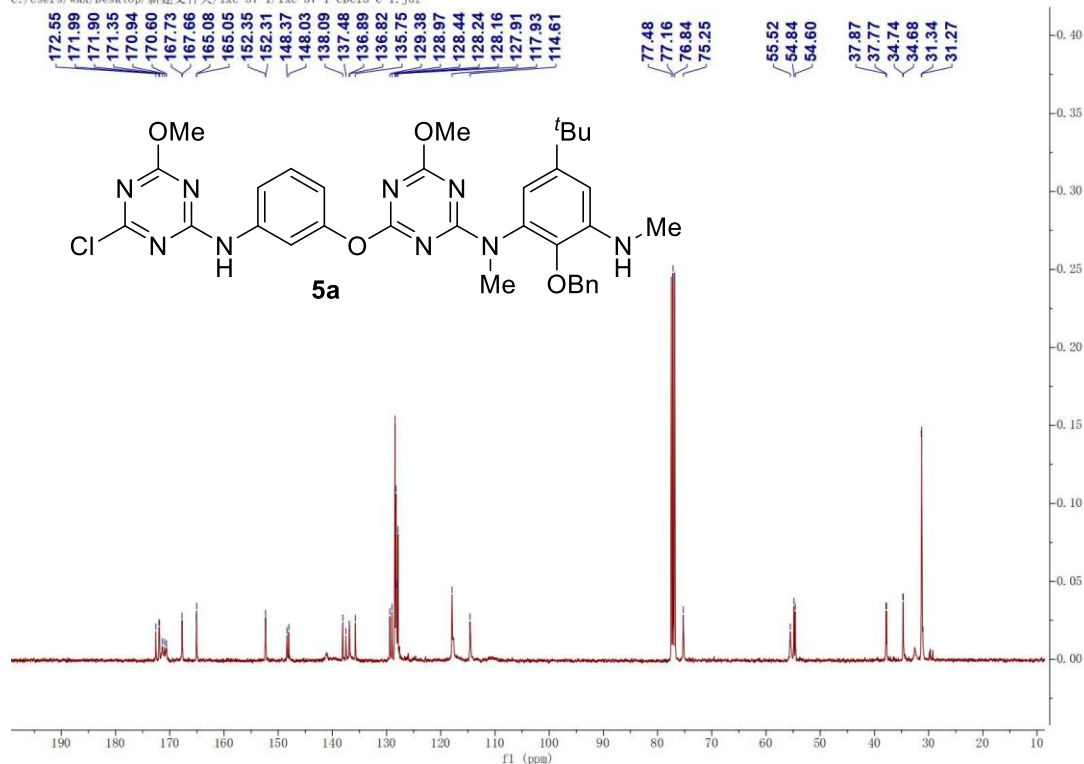

**5b: <sup>1</sup>H NMR, 400 MHz, CDCl<sub>3</sub>**

1xc-197-2-400-CDCl3 — single\_pulse

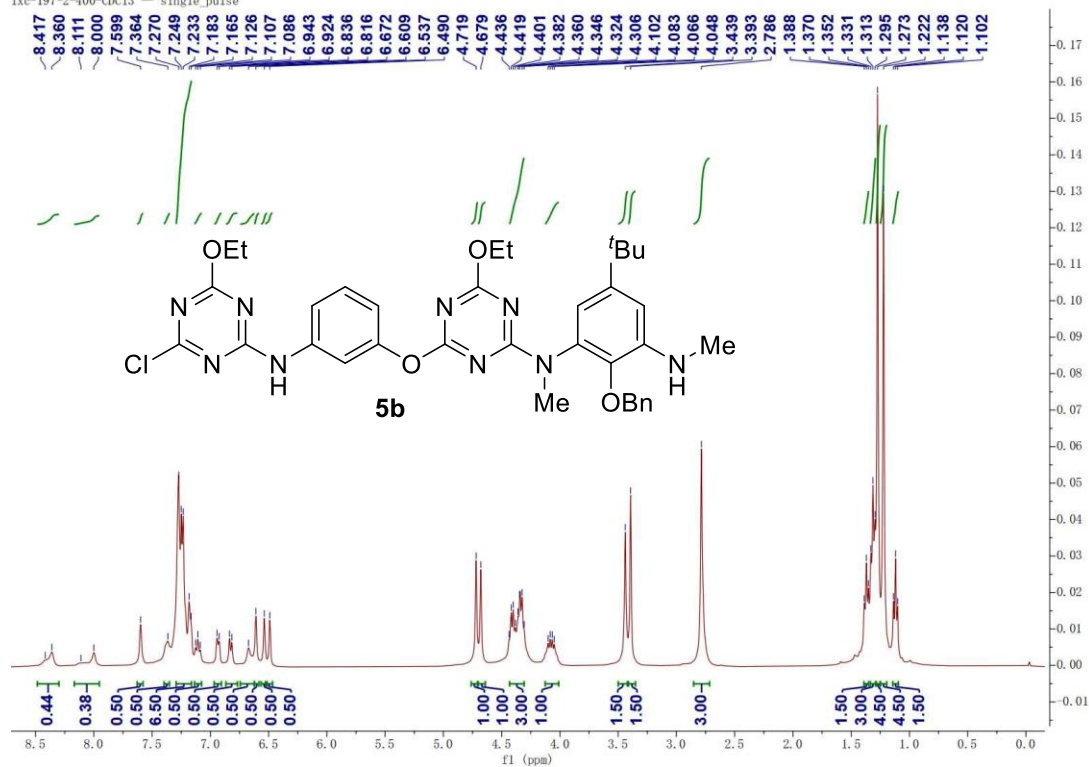

**5b:**  $^{13}\text{C}$  NMR, 100 MHz,  $\text{CDCl}_3$

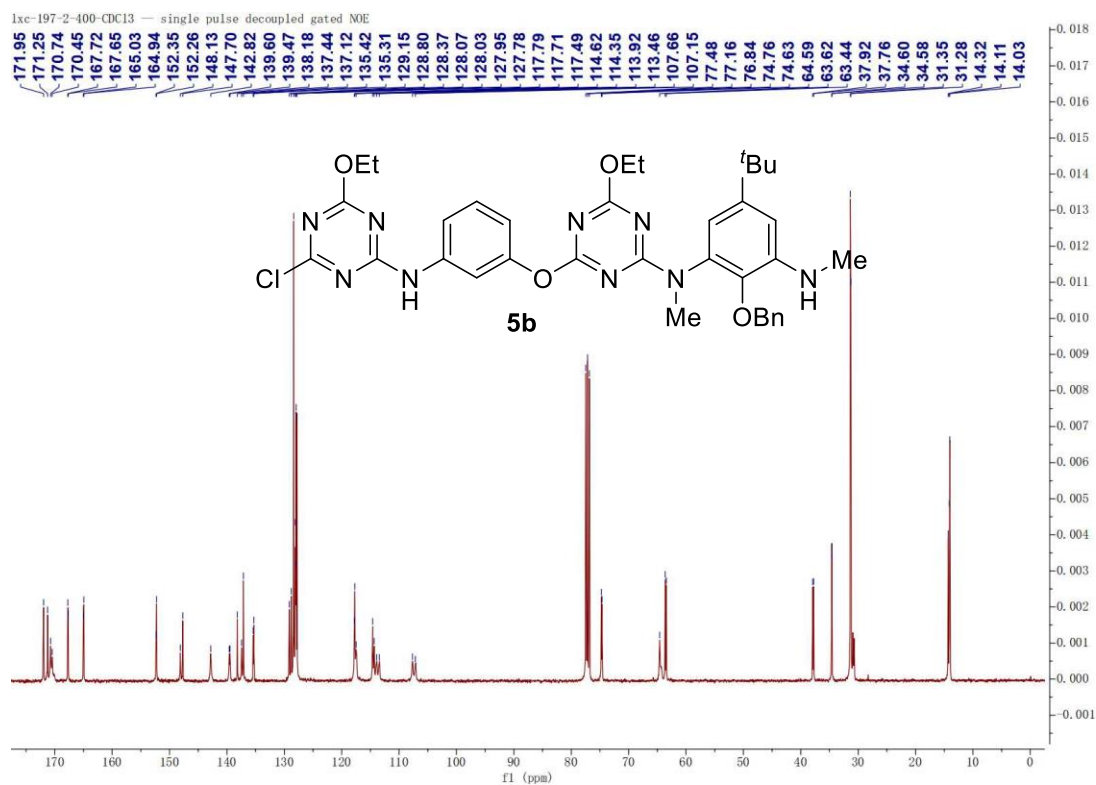

**5c:**  $^1\text{H}$  NMR, 400 MHz,  $\text{CDCl}_3$

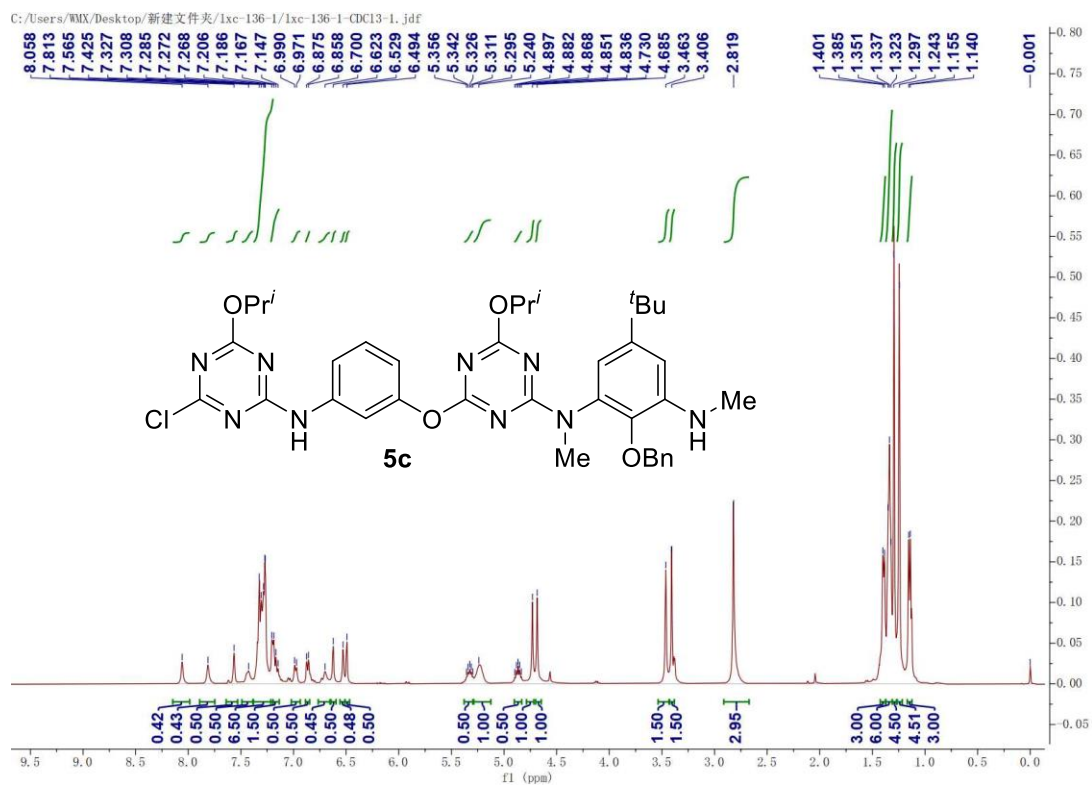

**5c:**  $^{13}\text{C}$  NMR, 150 MHz,  $\text{CDCl}_3$

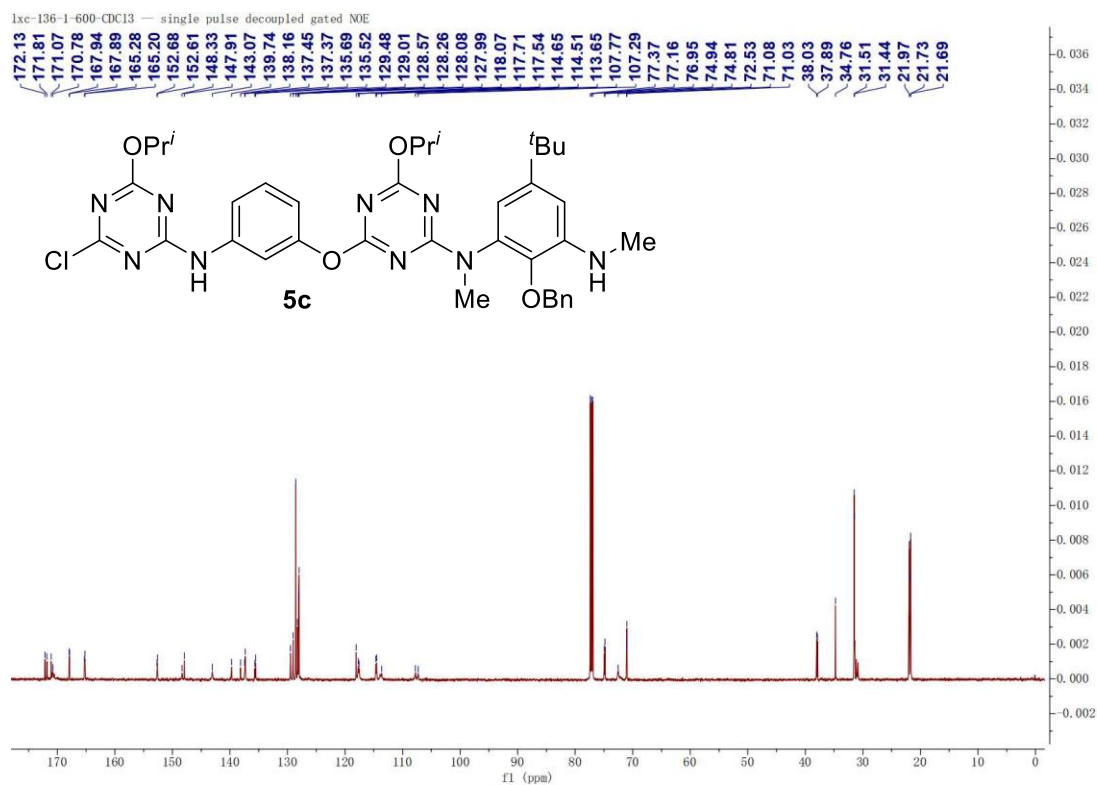

**5d:**  $^1\text{H}$  NMR, 400 MHz,  $\text{CDCl}_3$

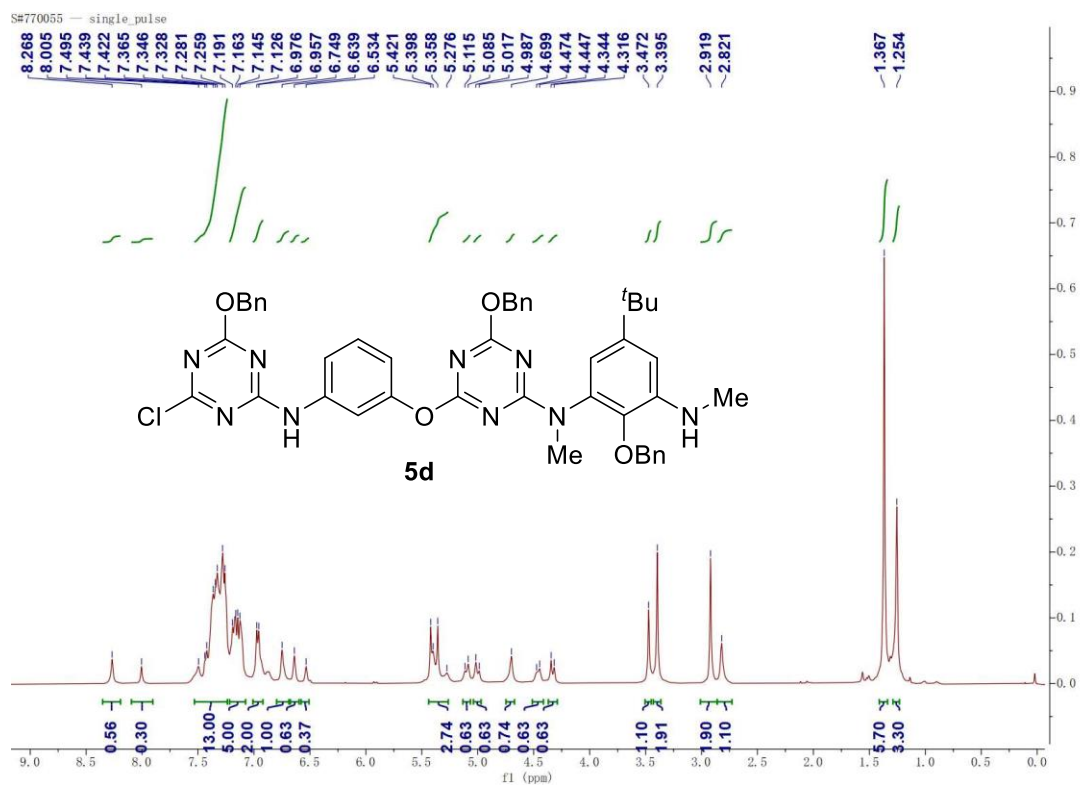

**5d:**  $^{13}\text{C}$  NMR, 100 MHz,  $\text{CDCl}_3$

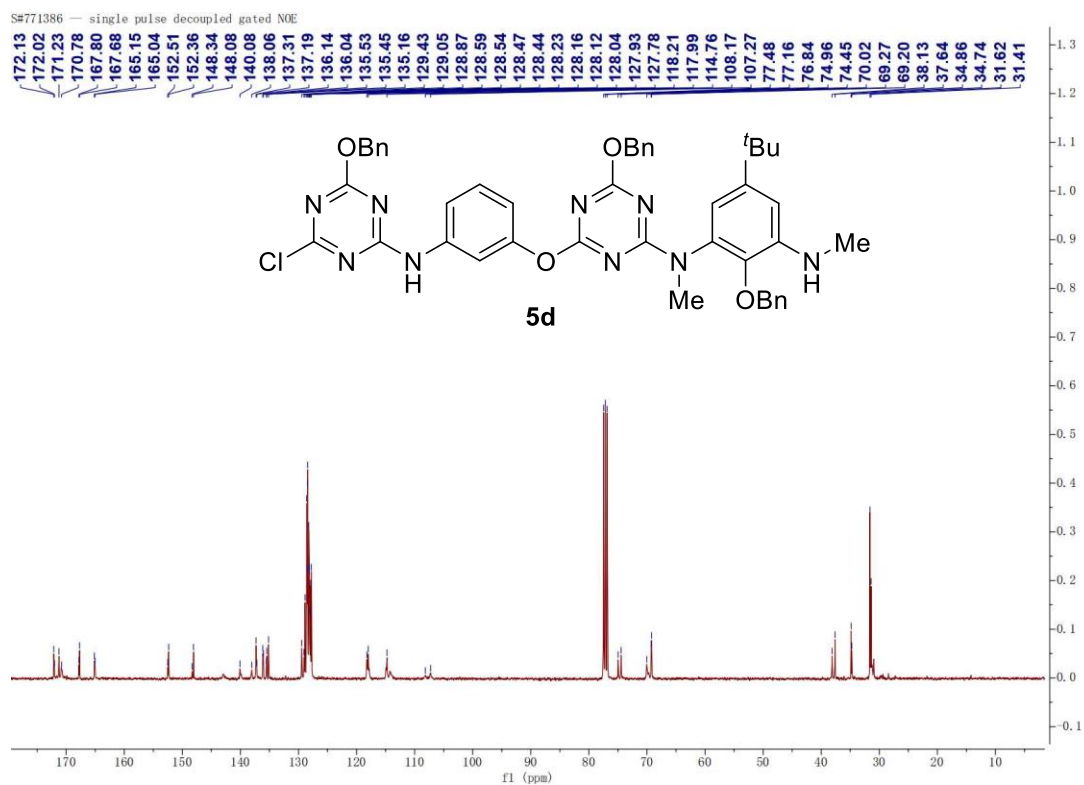

**5e:**  $^1\text{H}$  NMR, 400 MHz,  $\text{CDCl}_3$

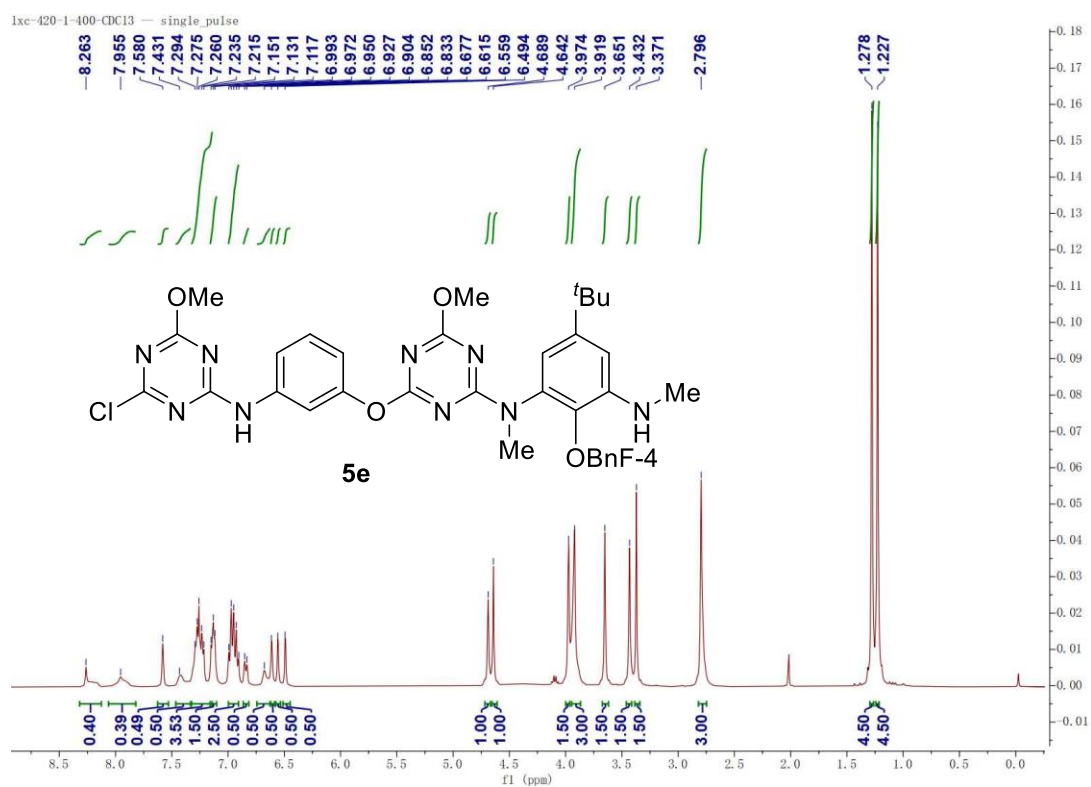

**5e:**  $^{13}\text{C}$  NMR, 150 MHz,  $\text{CDCl}_3$

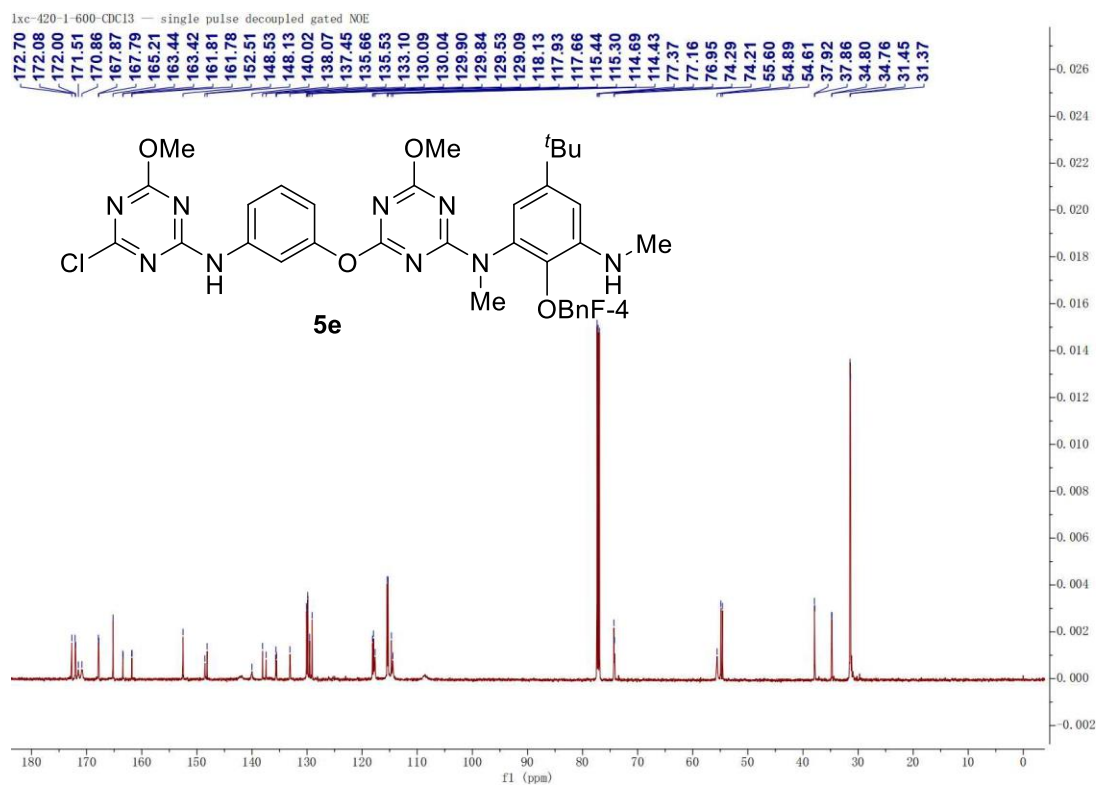

**5f:**  $^1\text{H}$  NMR, 600 MHz,  $\text{CDCl}_3$

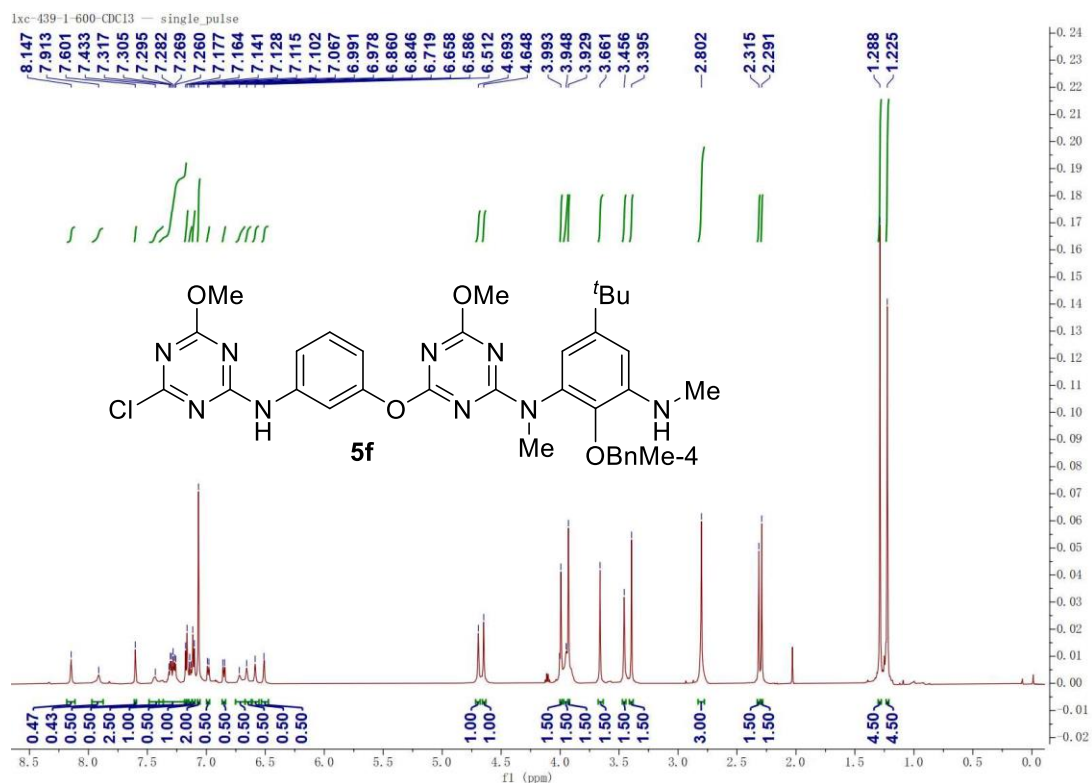

**5f:**  $^{13}\text{C}$  NMR, 150 MHz,  $\text{CDCl}_3$

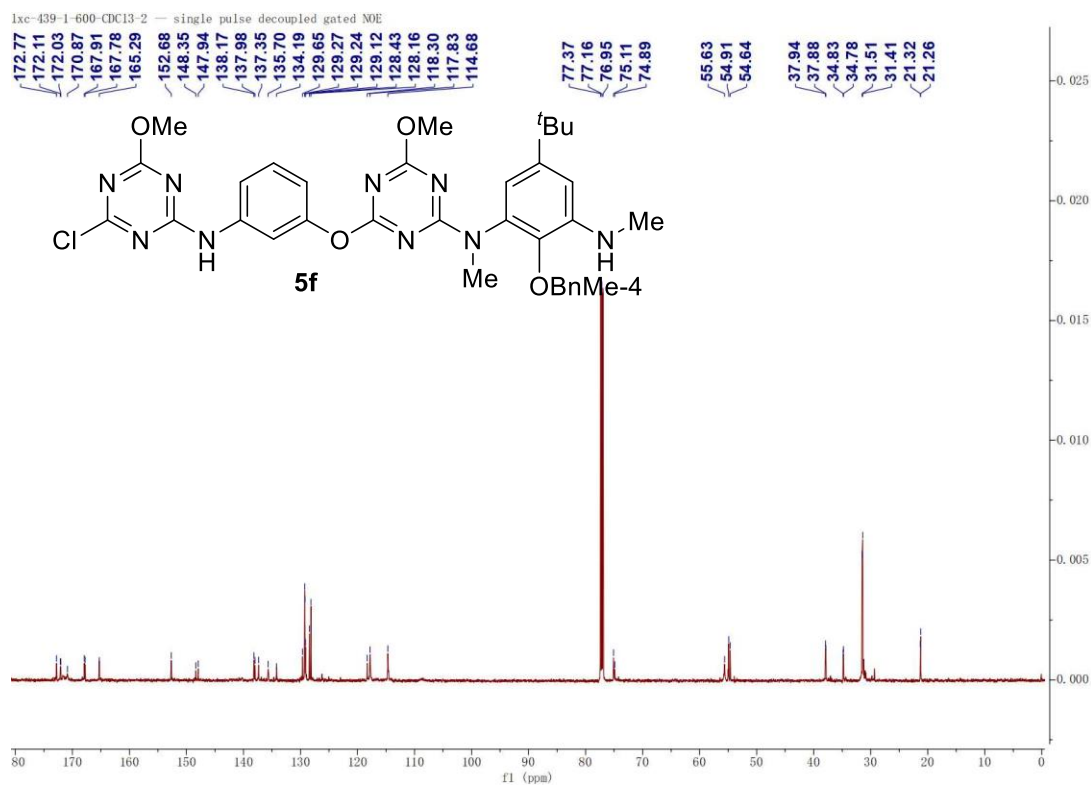

**5g:**  $^1\text{H}$  NMR, 400 MHz,  $\text{CDCl}_3$

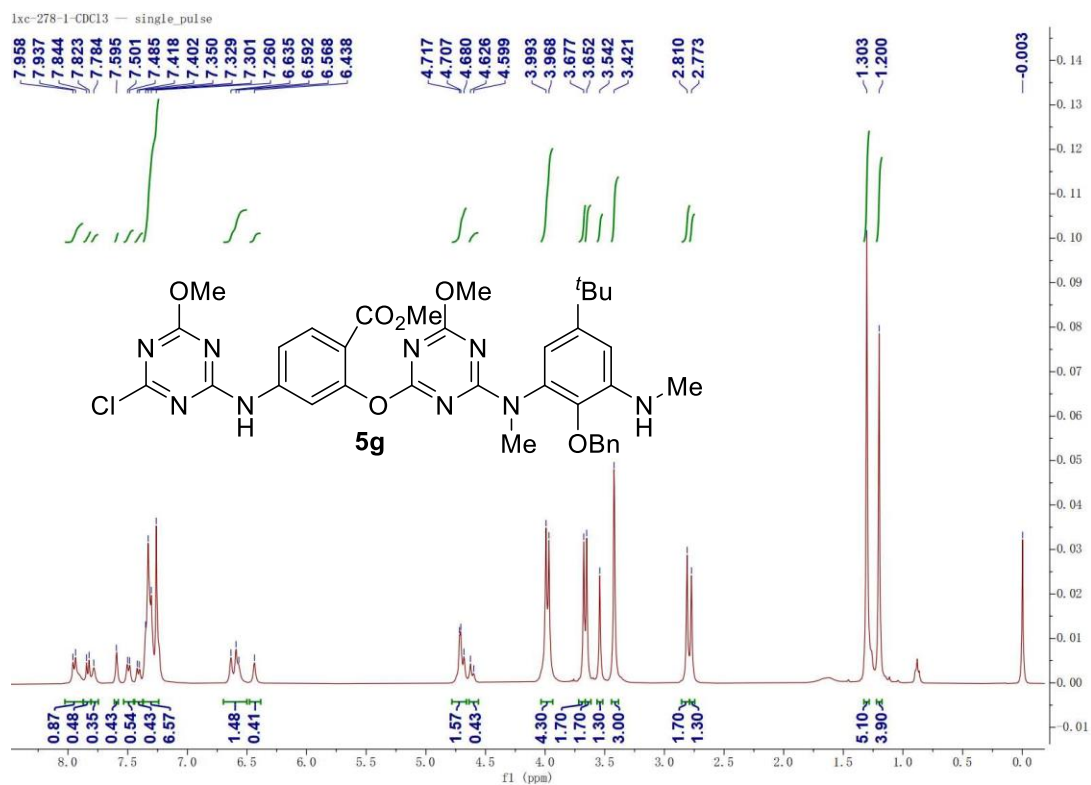

**5g:**  $^{13}\text{C}$  NMR, 100 MHz,  $\text{CDCl}_3$

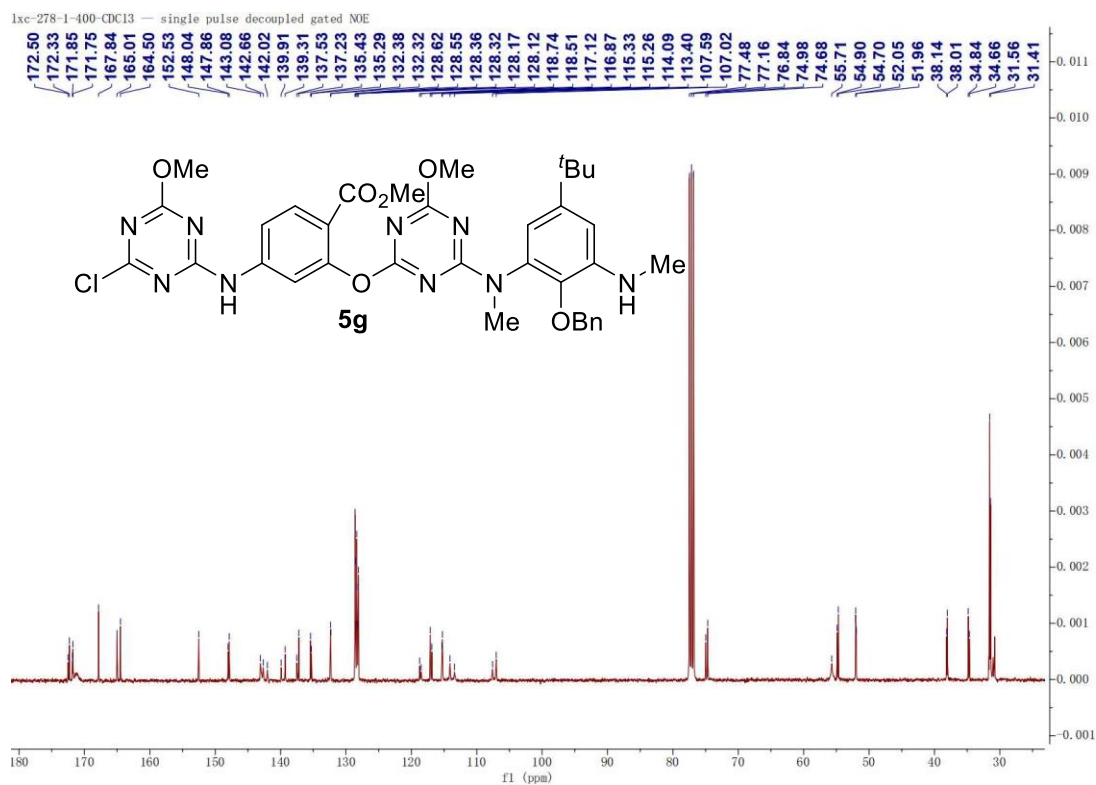

**5h:**  $^1\text{H}$  NMR, 600 MHz,  $\text{CDCl}_3$

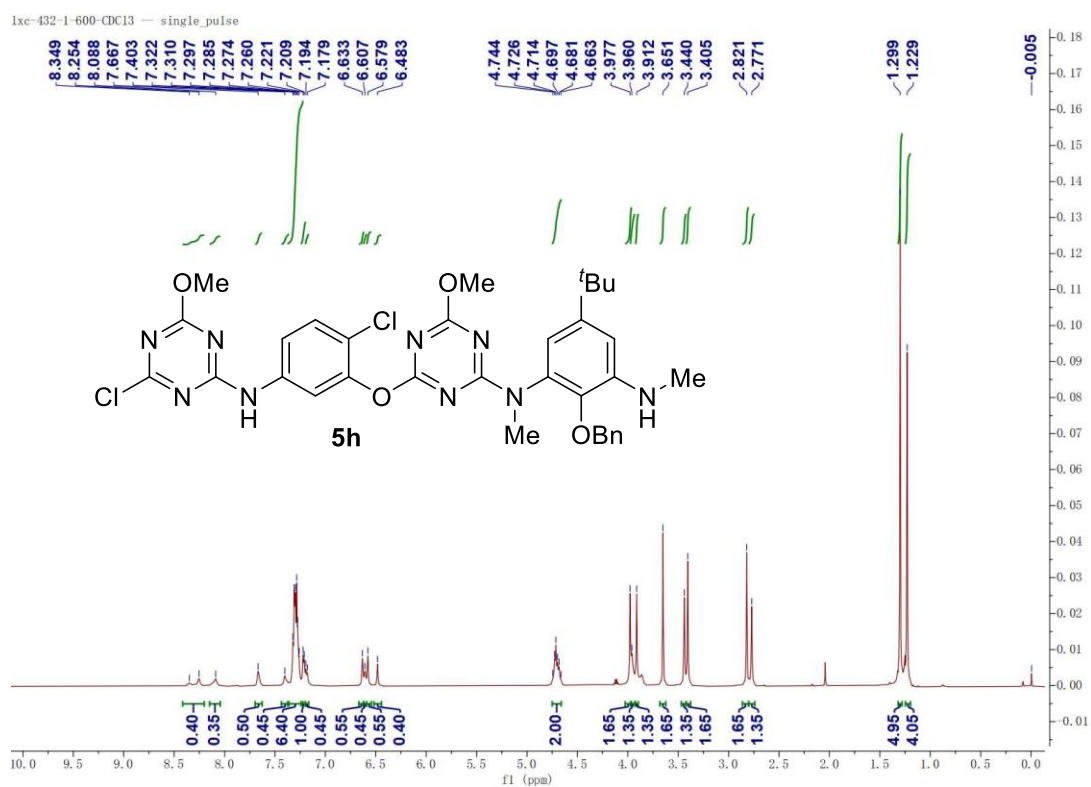

**5h:**  $^{13}\text{C}$  NMR, 150 MHz,  $\text{CDCl}_3$

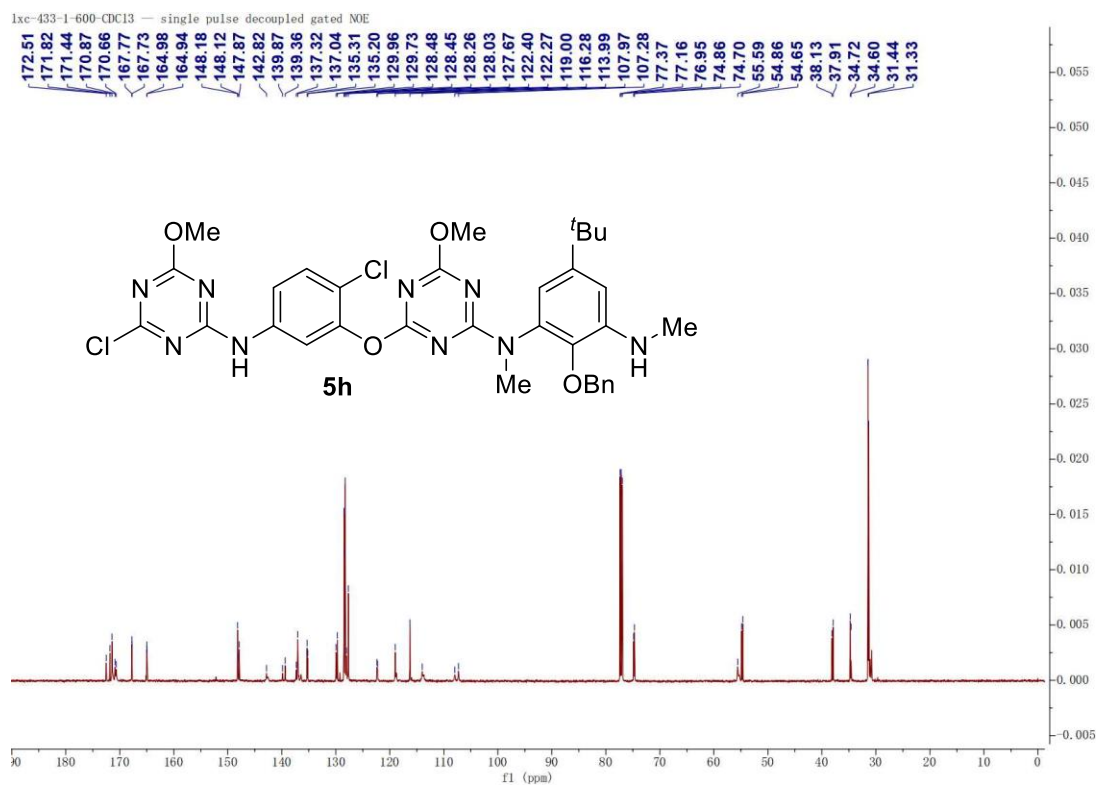

**5i:**  $^1\text{H}$  NMR, 400 MHz,  $\text{CDCl}_3$

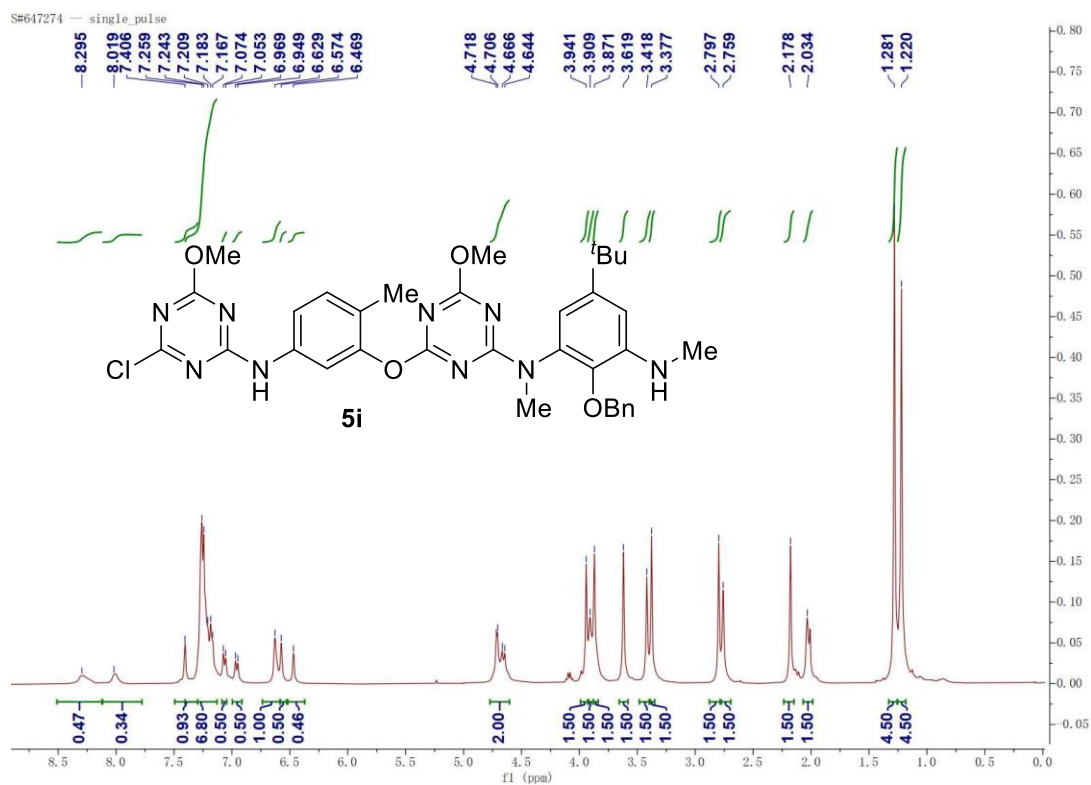

**5i:**  $^{13}\text{C}$  NMR, 100 MHz,  $\text{CDCl}_3$

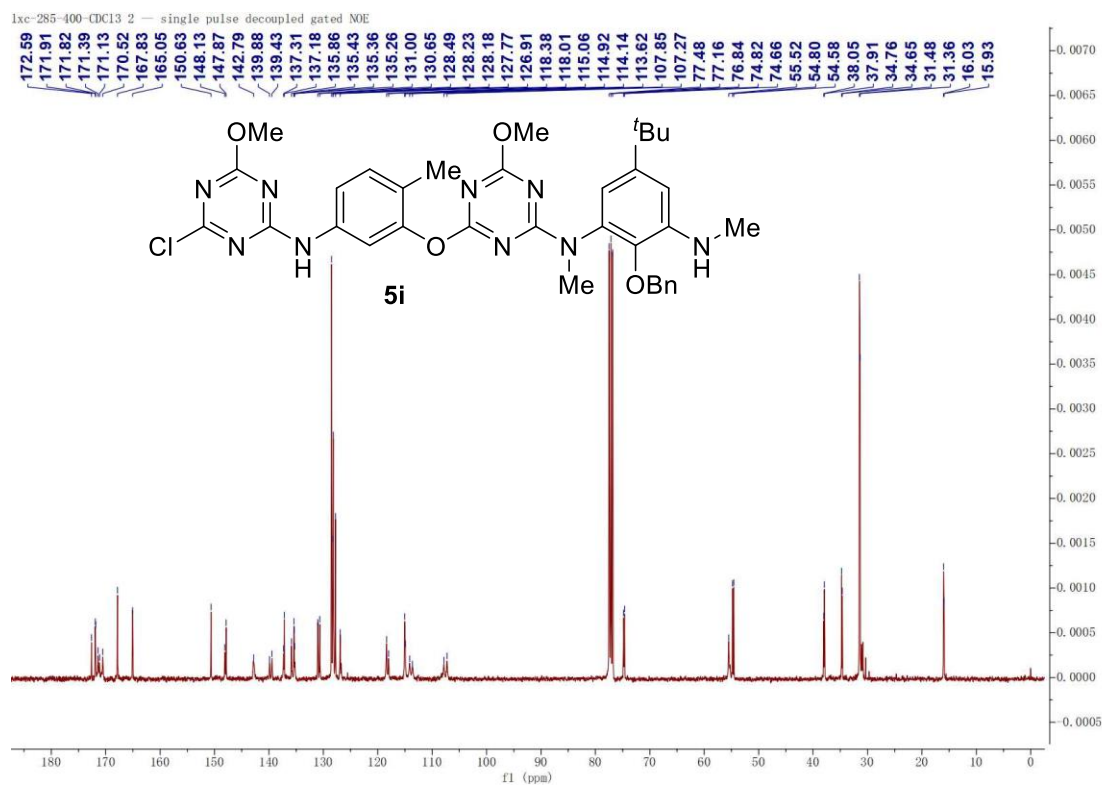

**5j:**  $^1\text{H}$  NMR, 400 MHz,  $\text{CDCl}_3$

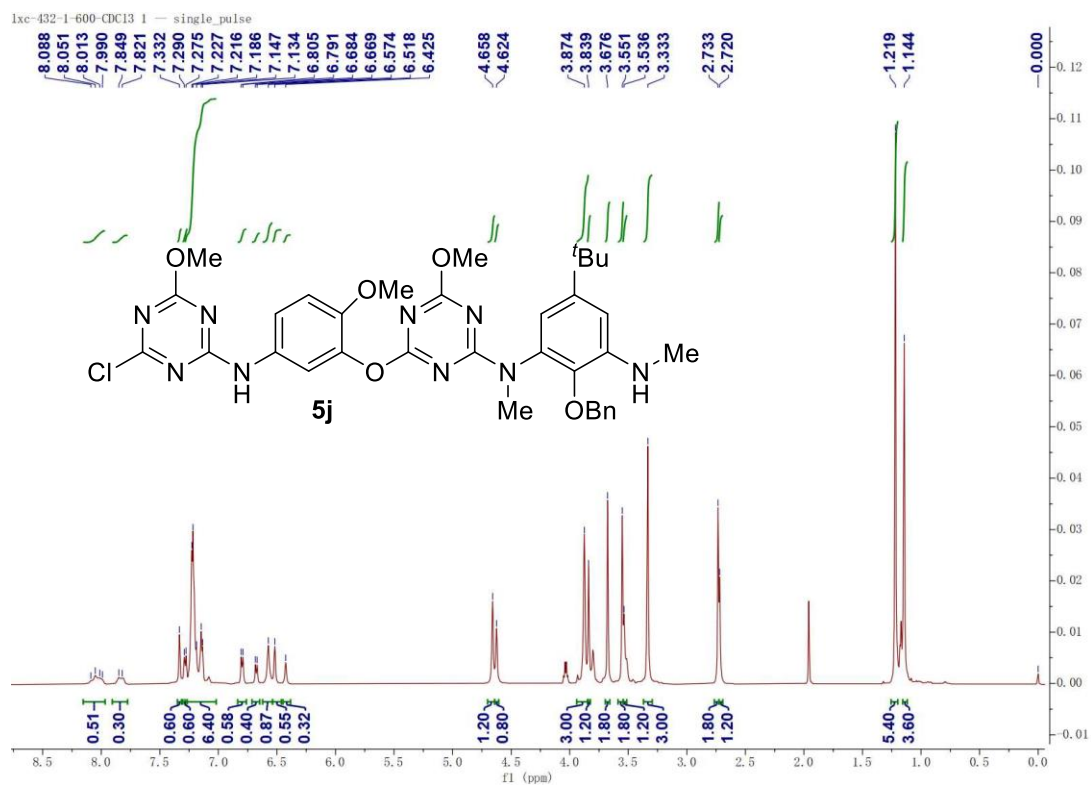

**5j:**  $^{13}\text{C}$  NMR, 100 MHz,  $\text{CDCl}_3$

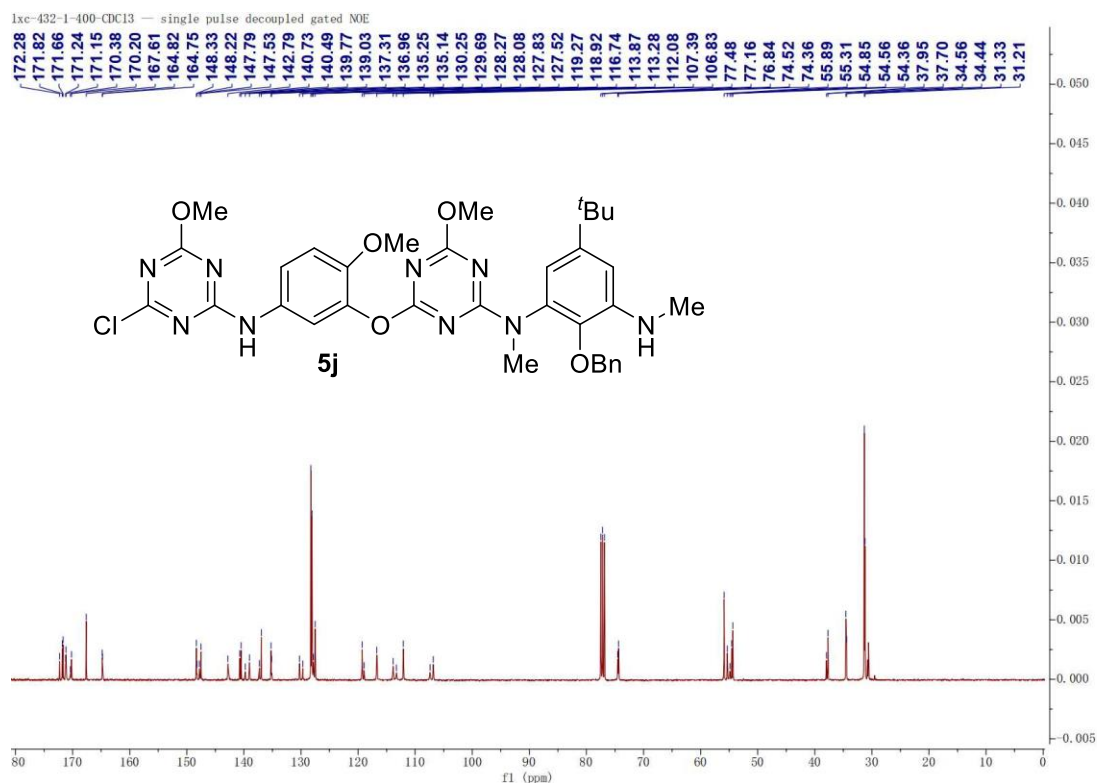

**5k:**  $^1\text{H}$  NMR, 400 MHz,  $\text{CDCl}_3$

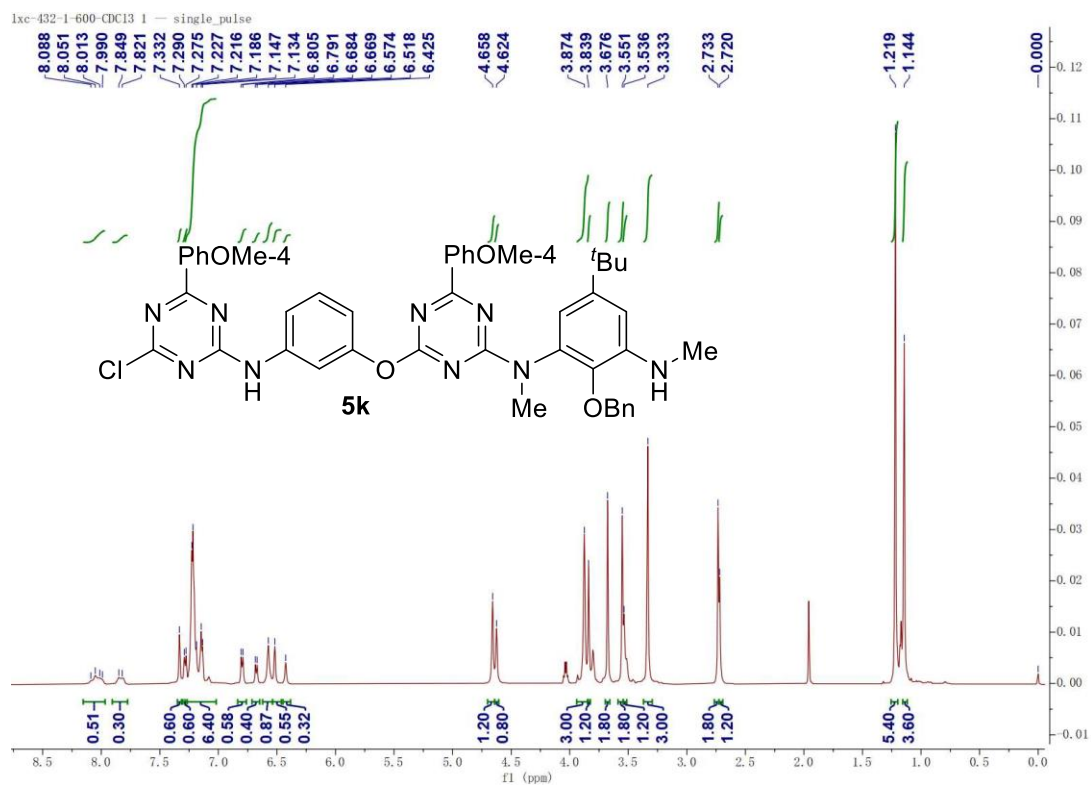

**5k:**  $^{13}\text{C}$  NMR, 150 MHz,  $\text{CDCl}_3$

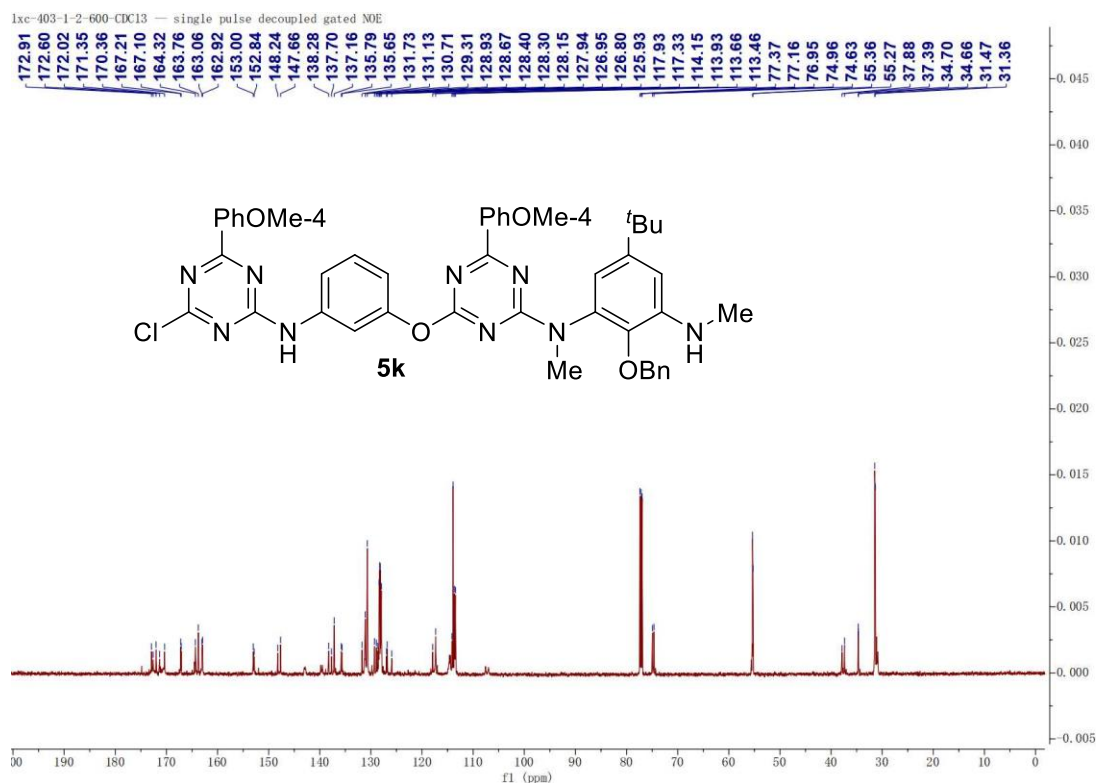

**5l:**  $^1\text{H}$  NMR, 600 MHz,  $\text{CDCl}_3$

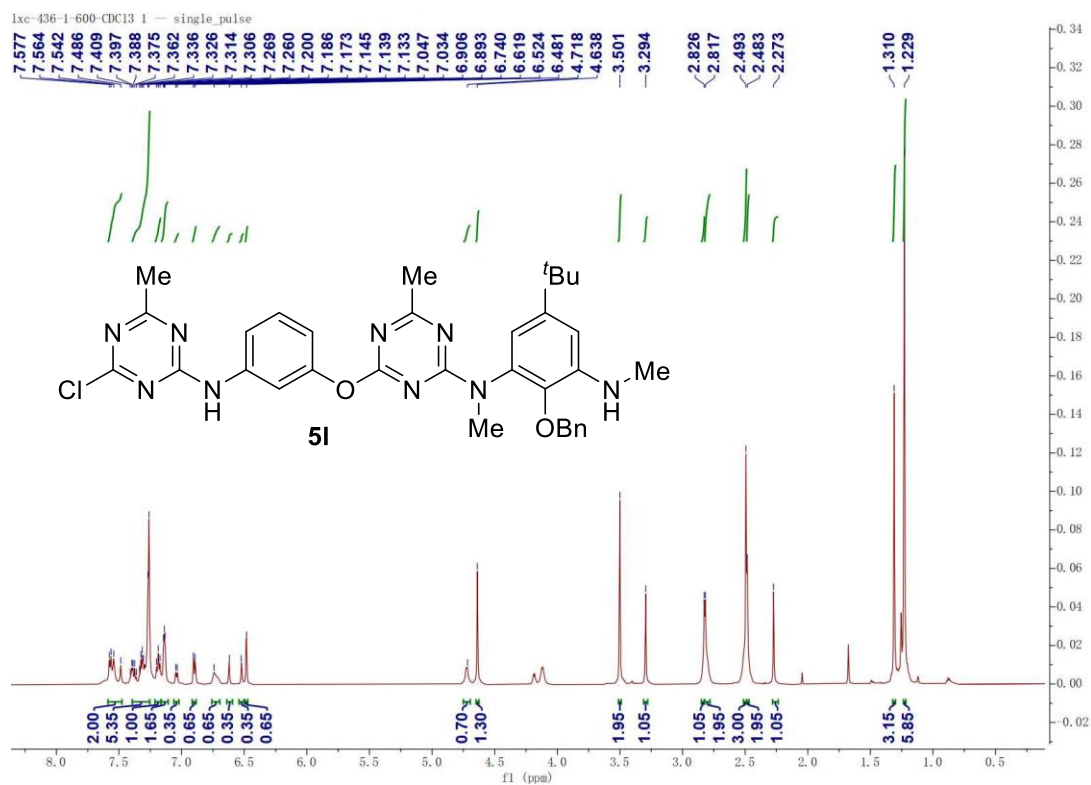

**5I:**  $^{13}\text{C}$  NMR, 150 MHz,  $\text{CDCl}_3$

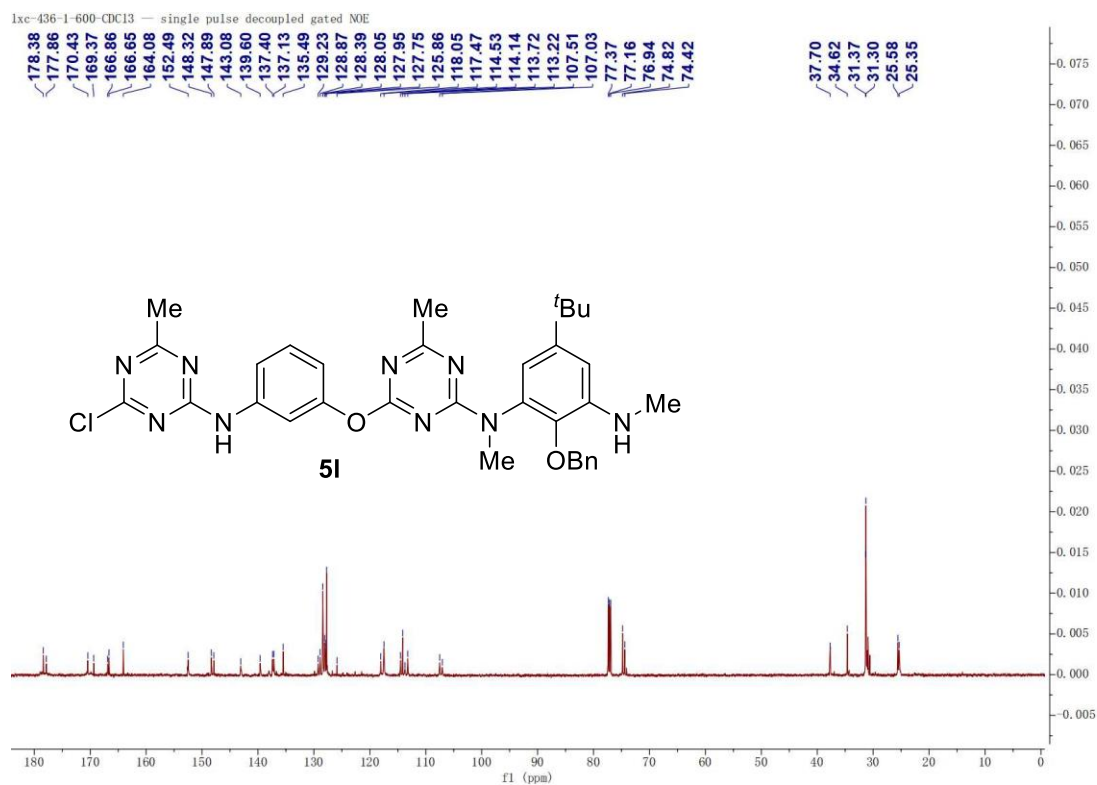

**6a:**  $^1\text{H}$  NMR, 400 MHz,  $\text{acetone-}d_6$

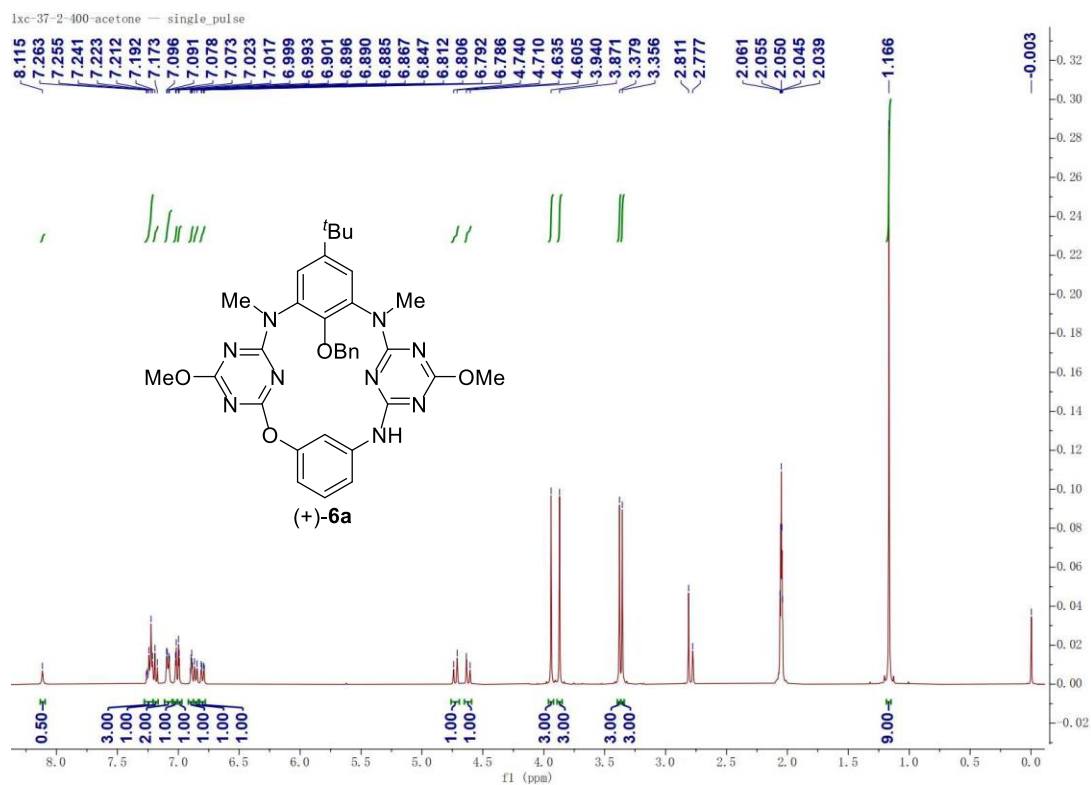



**6b:**  $^{13}\text{C}$  NMR, 100 MHz,  $\text{CDCl}_3$

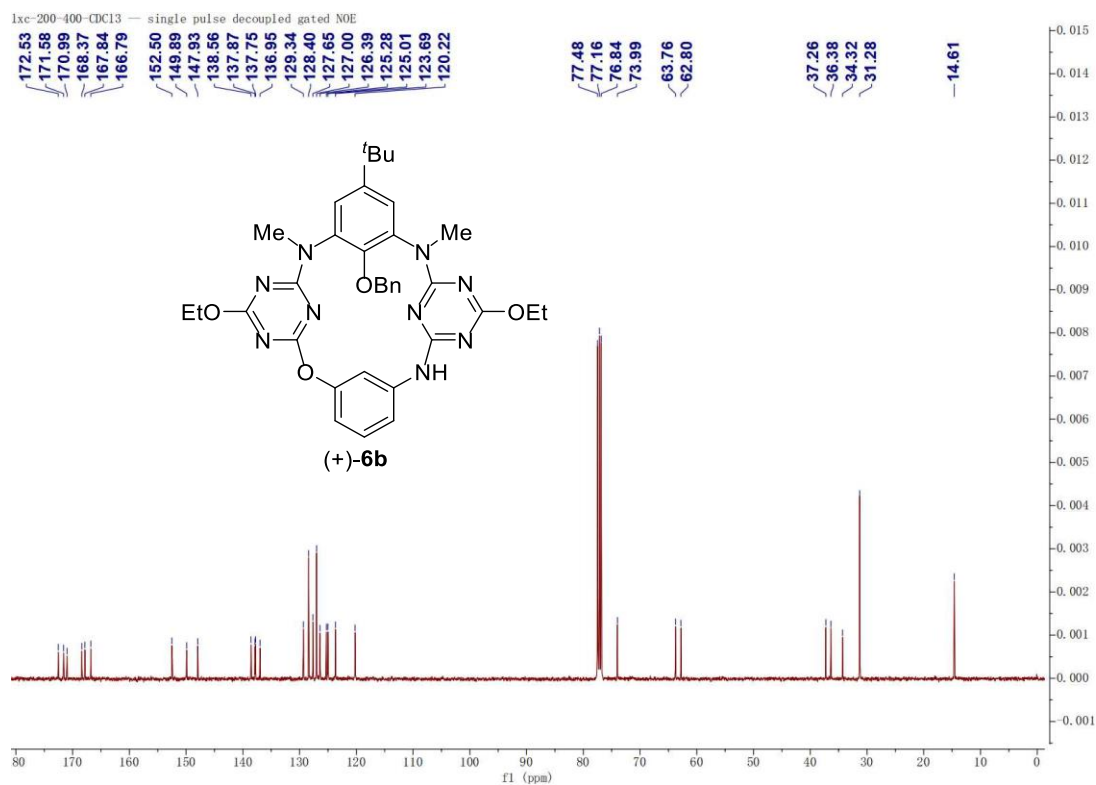

**6c:**  $^1\text{H}$  NMR, 600 MHz,  $\text{acetone-}d_6$

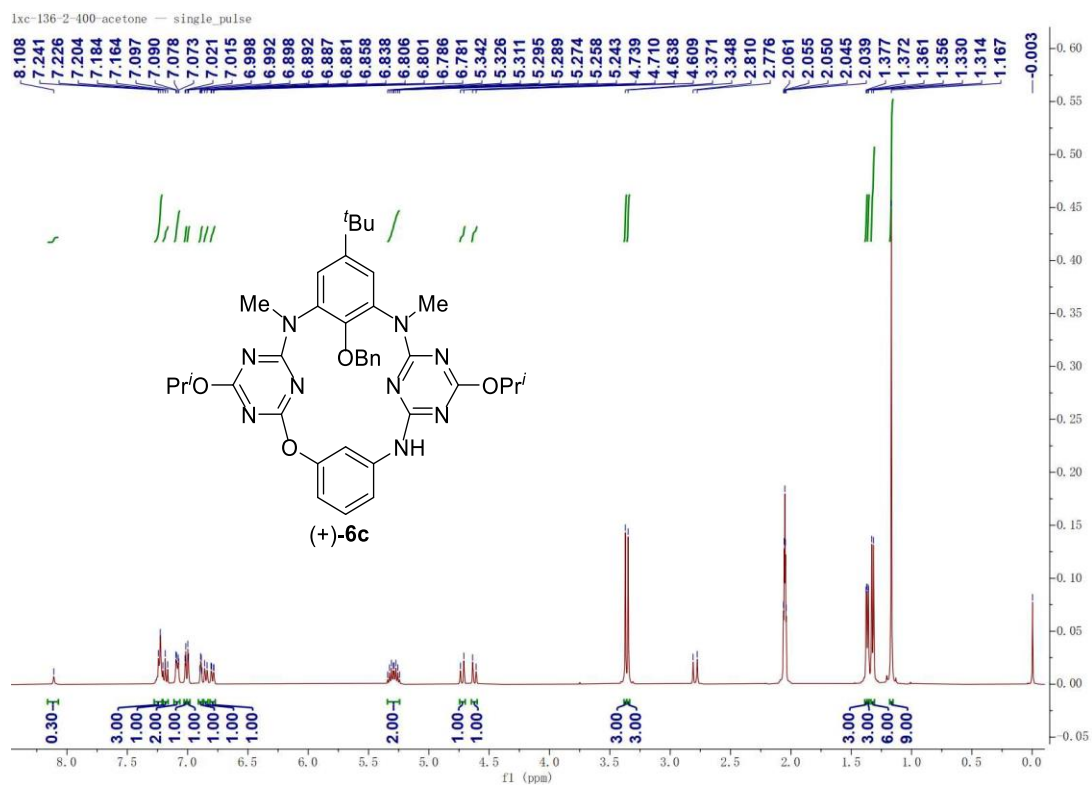

**6c:**  $^{13}\text{C}$  NMR, 150 MHz,  $\text{CDCl}_3$

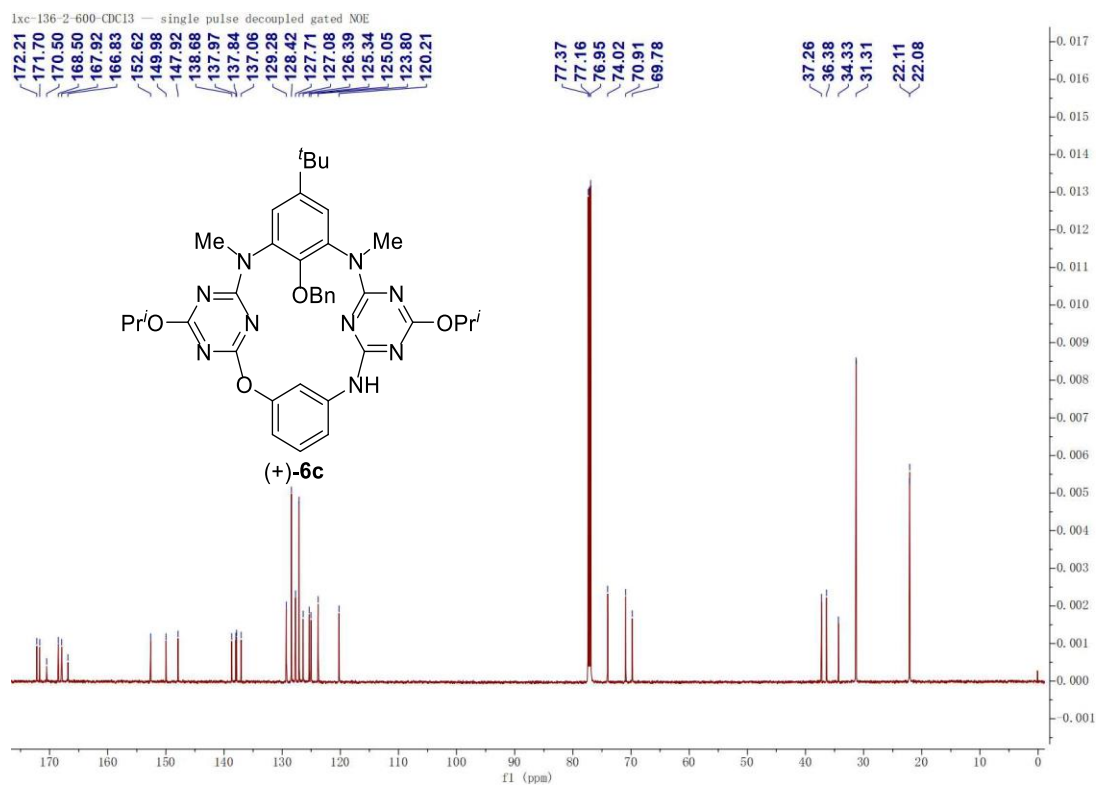

**6d:**  $^1\text{H}$  NMR, 400 MHz,  $\text{acetone-}d_6$

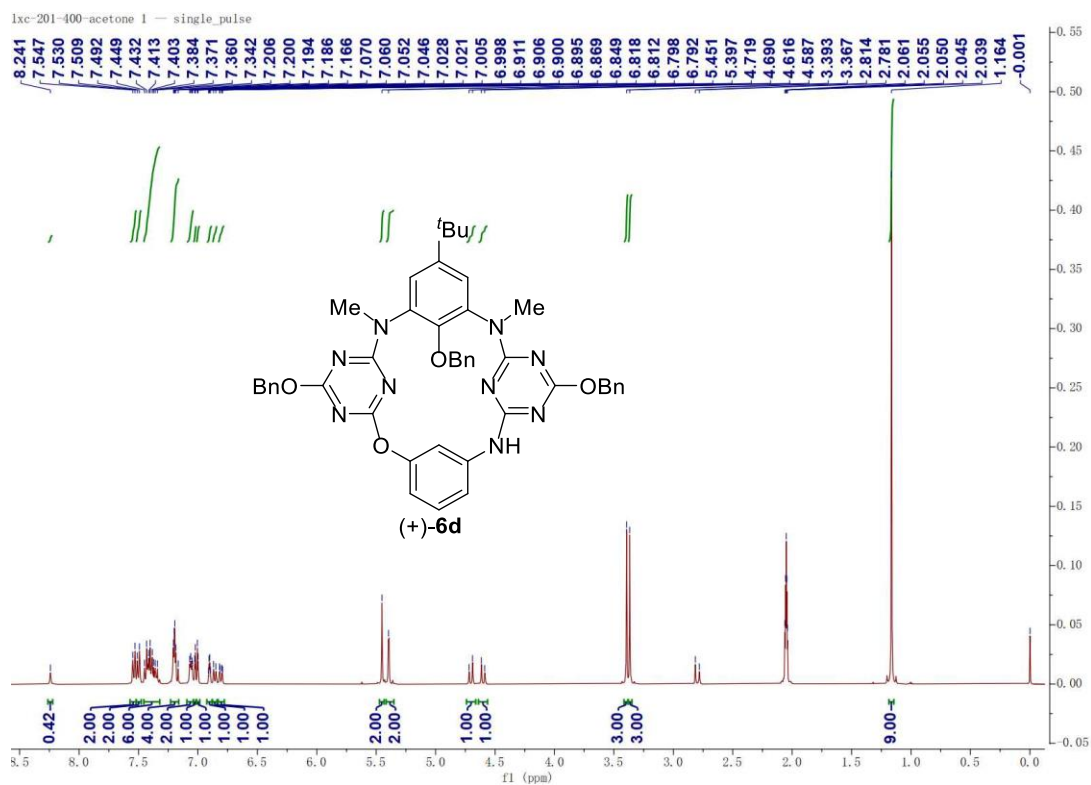



**6e:**  $^{13}\text{C}$  NMR, 100 MHz,  $\text{CDCl}_3$

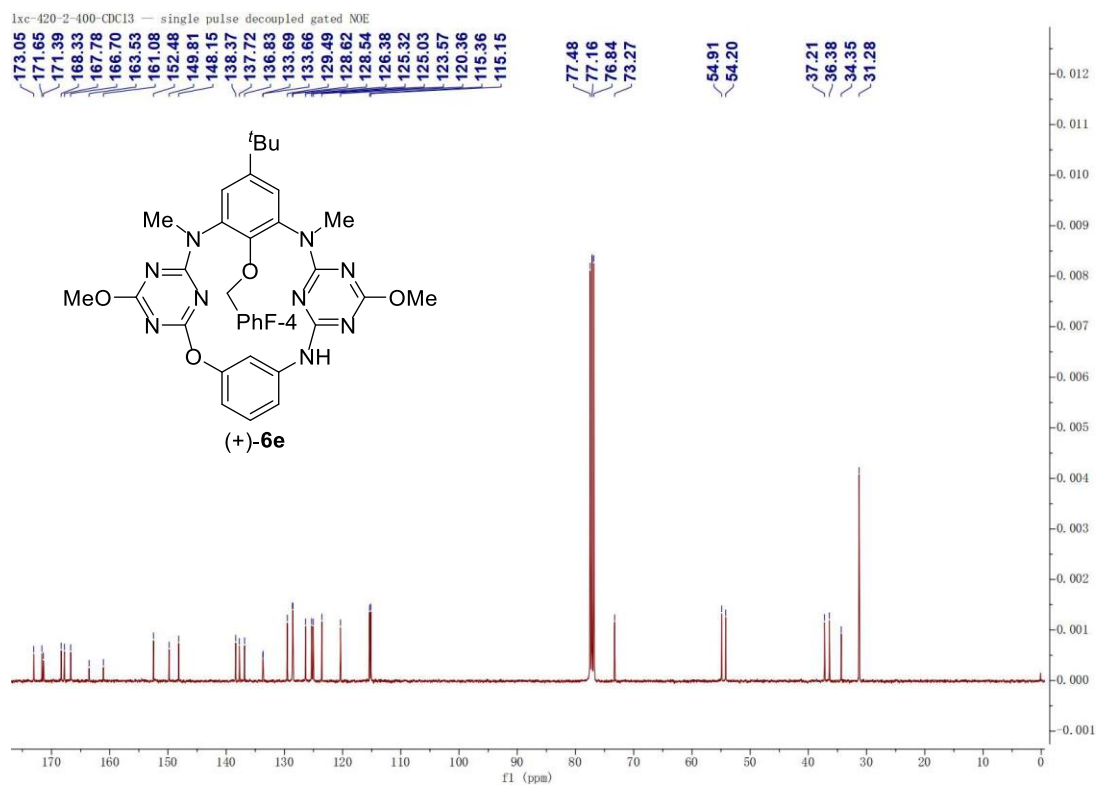

**6f:**  $^1\text{H}$  NMR, 400 MHz,  $\text{acetone-}d_6$

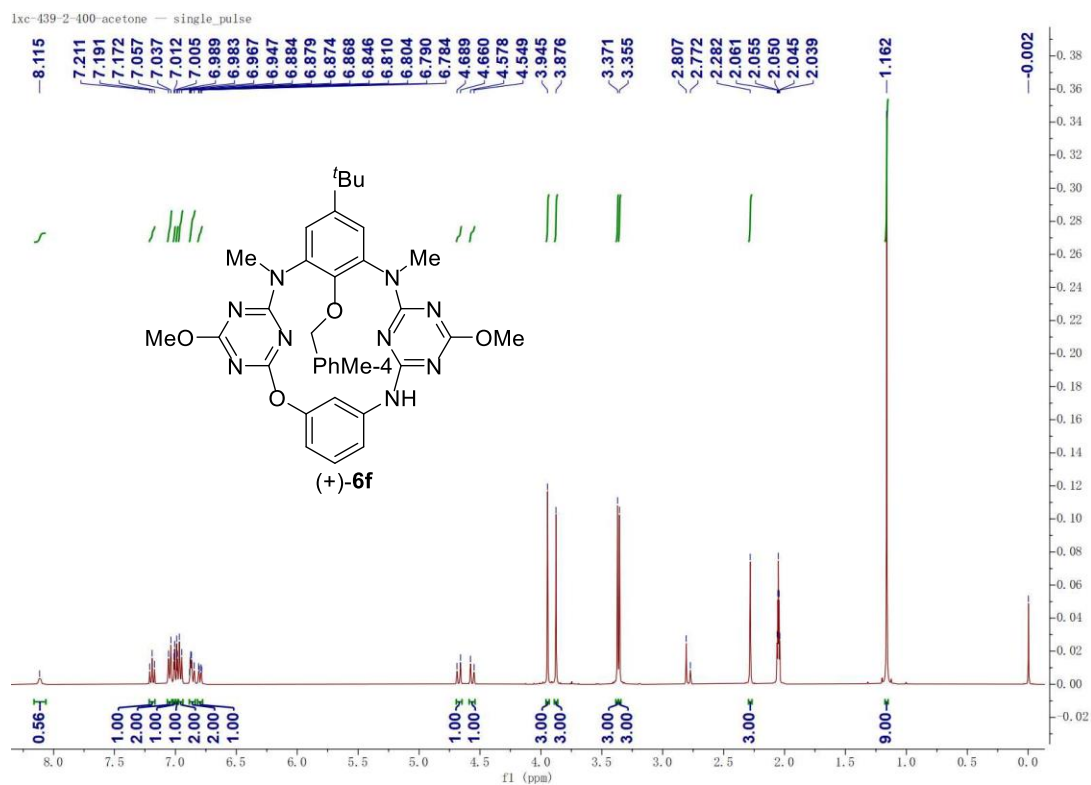

**6f:**  $^{13}\text{C}$  NMR, 150 MHz,  $\text{CDCl}_3$

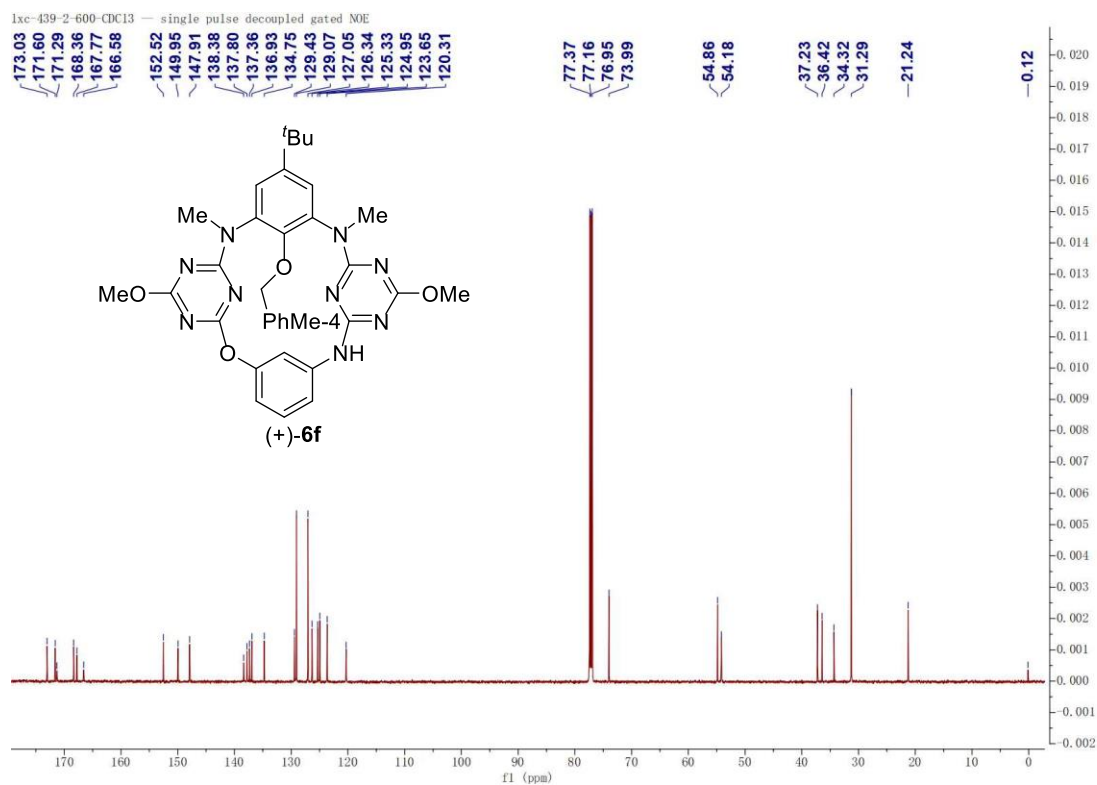

**6g:**  $^1\text{H}$  NMR, 600 MHz,  $\text{CDCl}_3$

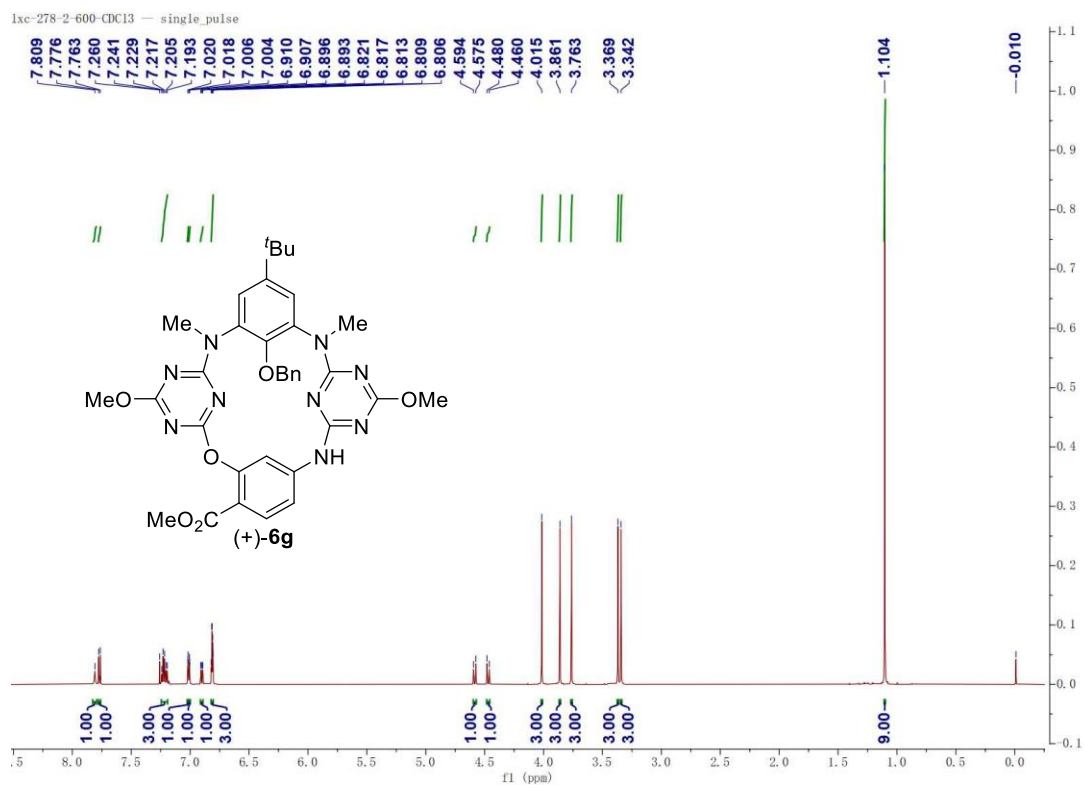

**6g:**  $^{13}\text{C}$  NMR, 150 MHz,  $\text{CDCl}_3$

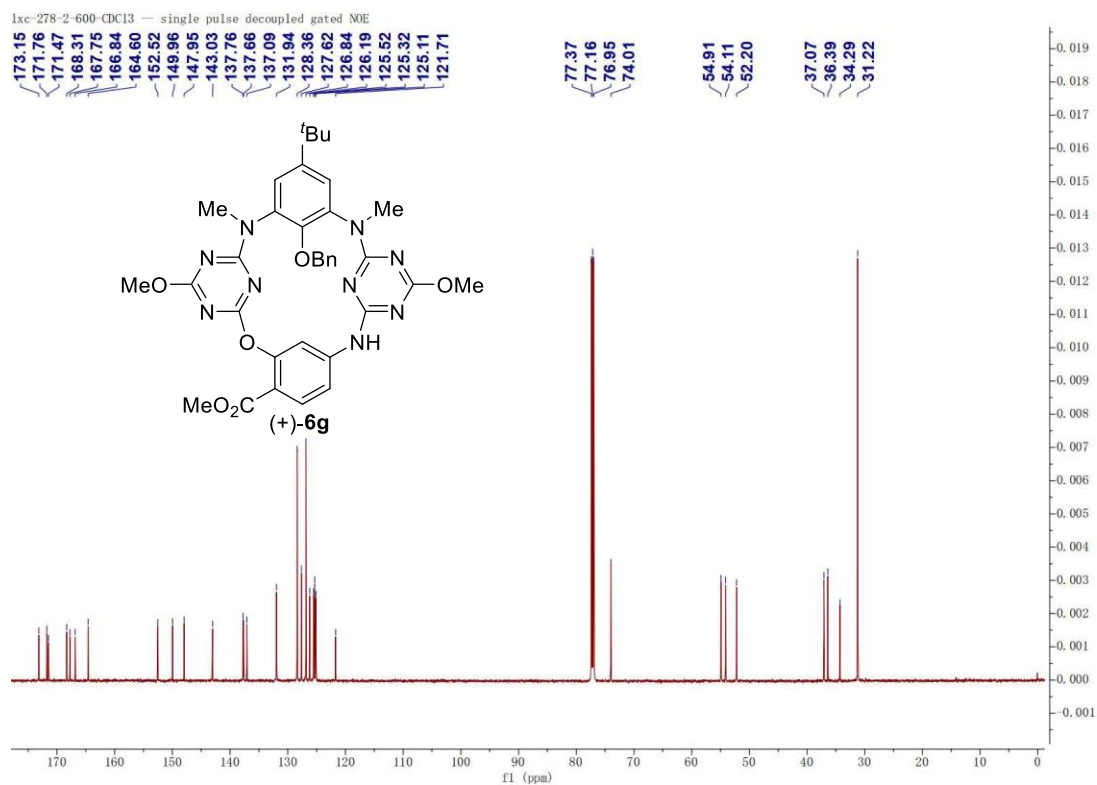

**6h:**  $^1\text{H}$  NMR, 400 MHz,  $\text{acetone-}d_6$

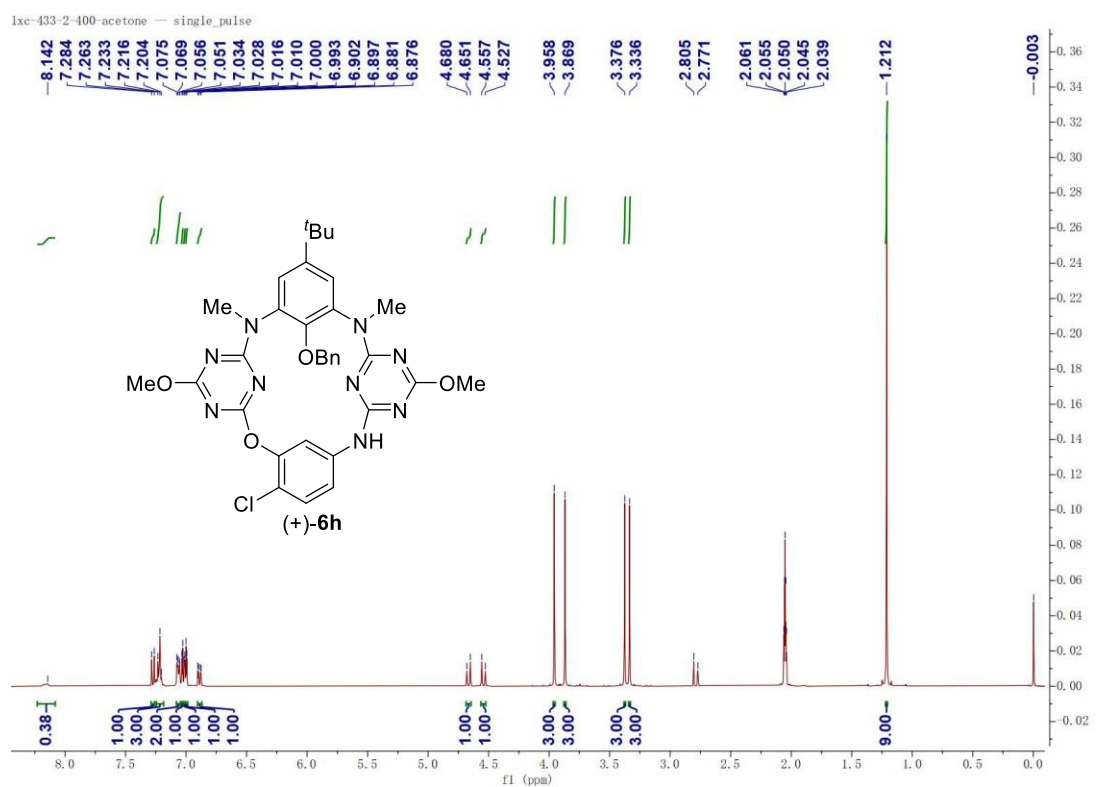

**6h:**  $^{13}\text{C}$  NMR, 150 MHz,  $\text{CDCl}_3$

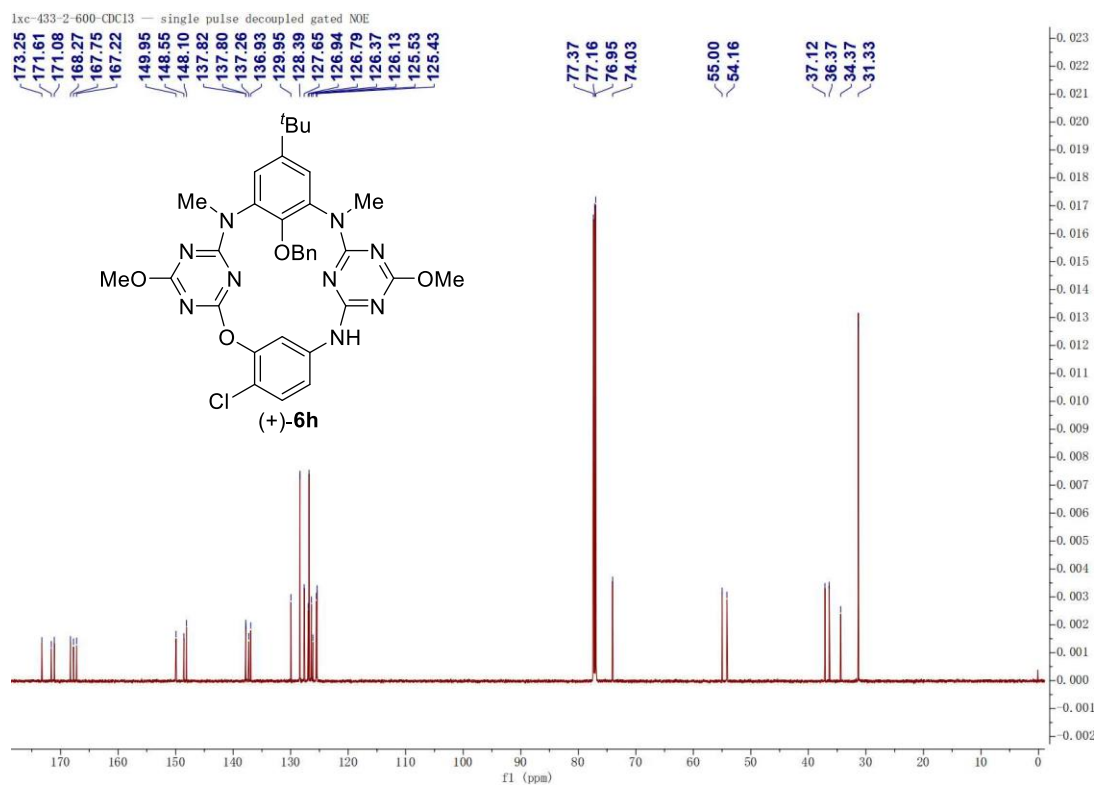

**6i:**  $^1\text{H}$  NMR, 400 MHz,  $\text{acetone-}d_6$

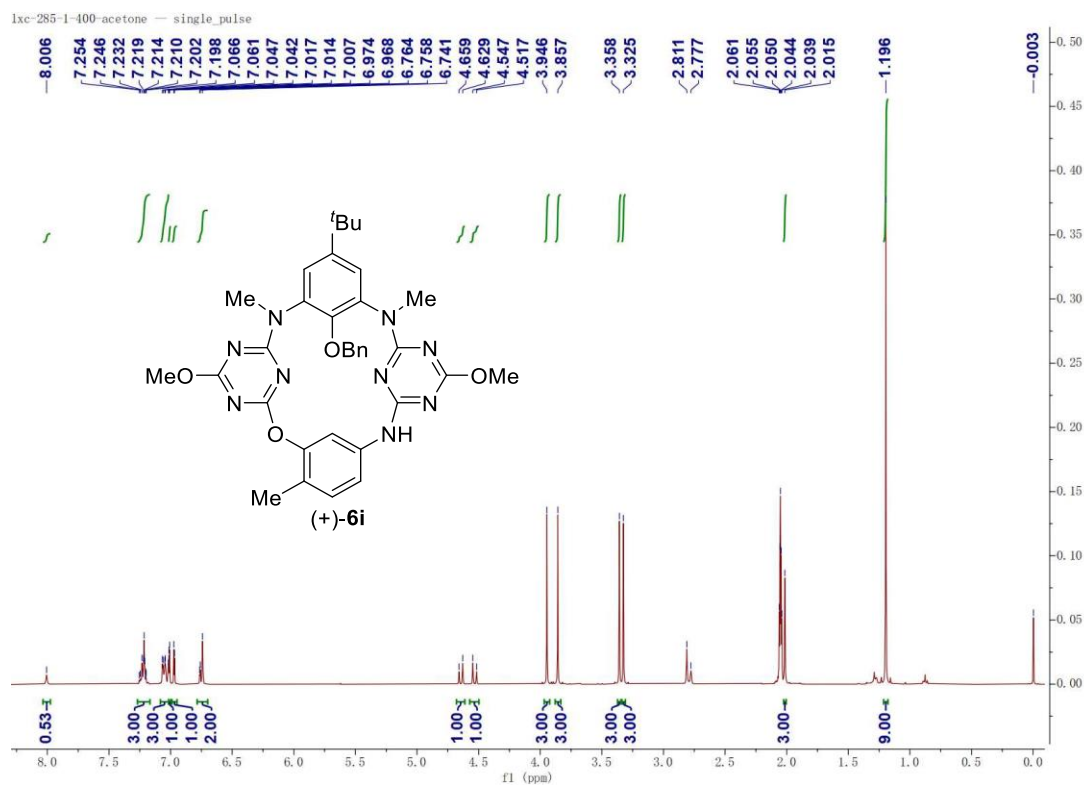

**6i:**  $^{13}\text{C}$  NMR, 100 MHz,  $\text{CDCl}_3$

lxc-285-1-400- $\text{CDCl}_3$  — single pulse decoupled gated NOE

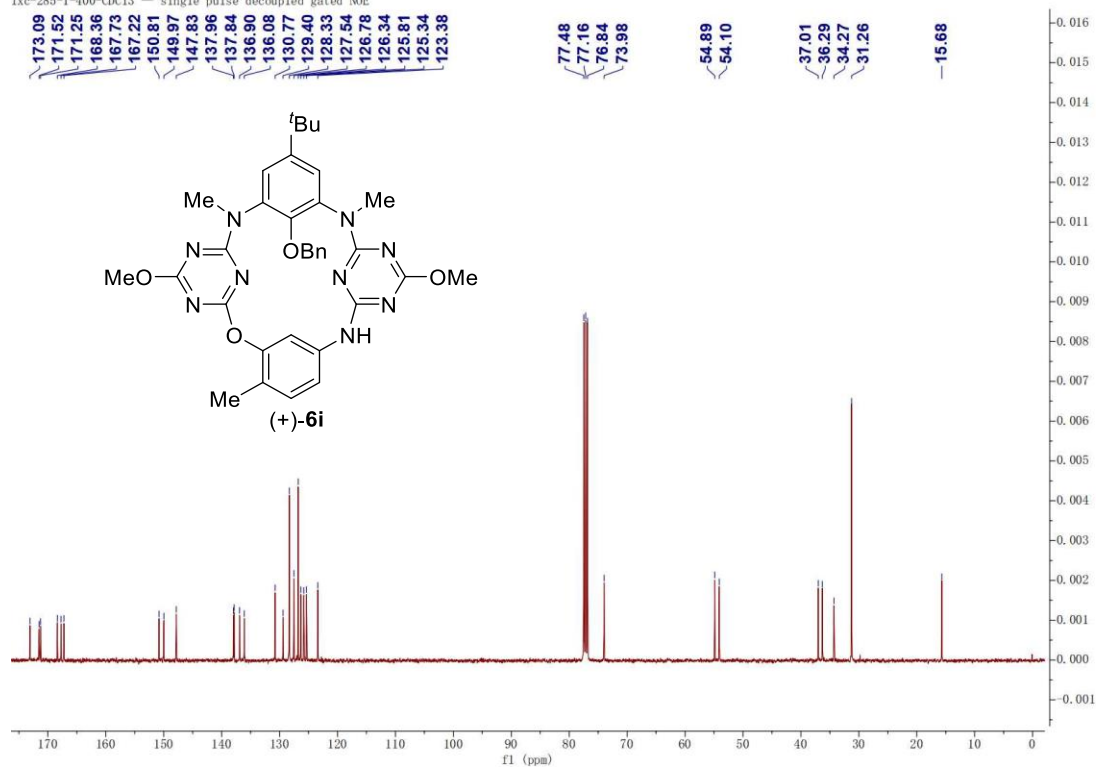

**6j:**  $^1\text{H}$  NMR, 400 MHz,  $\text{acetone-}d_6$

lxc-432-2-400-acetone — single\_pulse

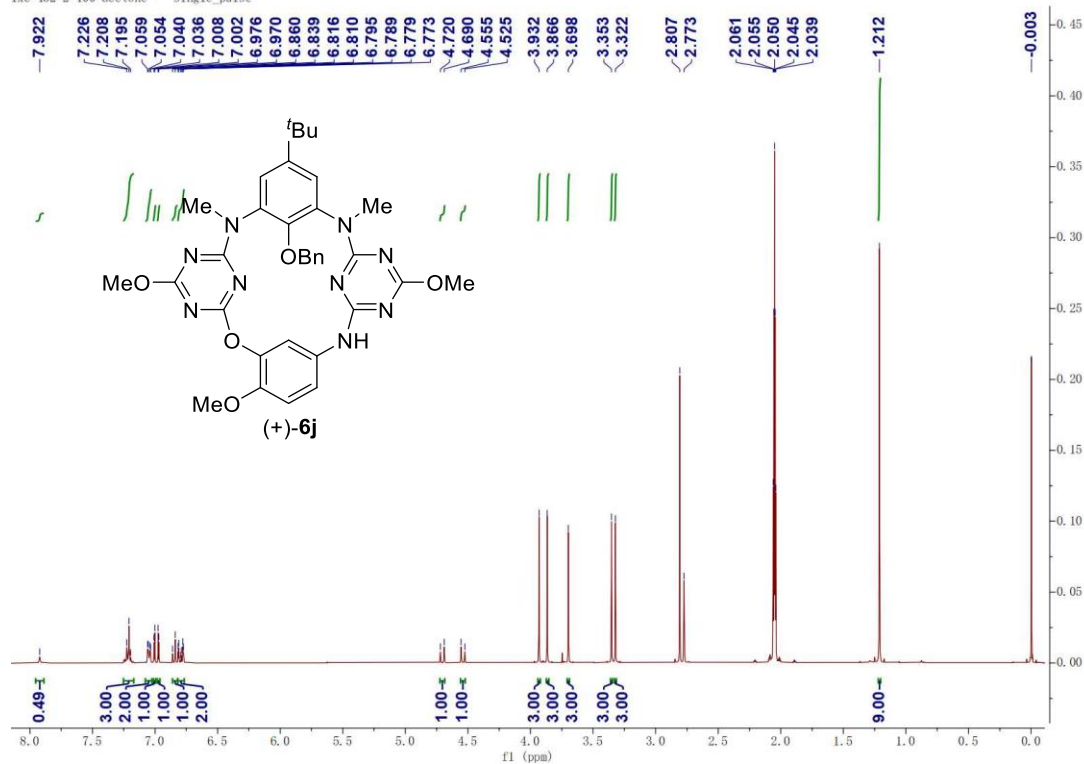

**6j:**  $^{13}\text{C}$  NMR, 150 MHz,  $\text{CDCl}_3$

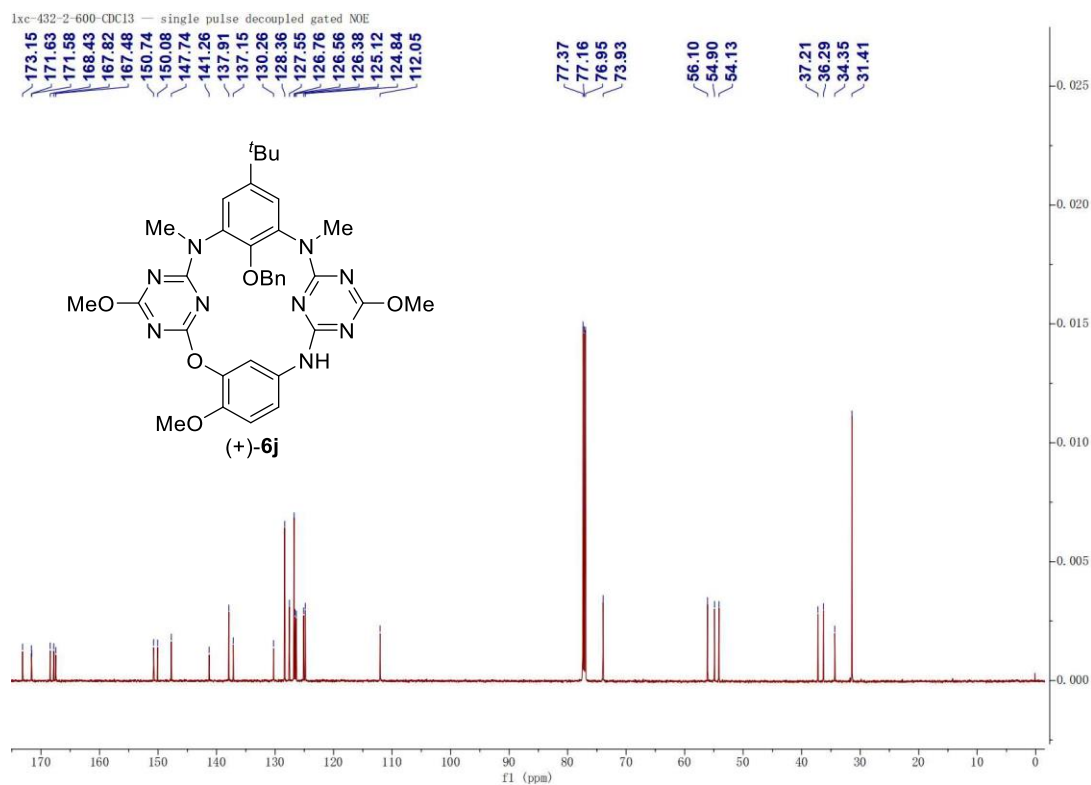

**6k:**  $^1\text{H}$  NMR, 400 MHz,  $\text{acetone-}d_6$

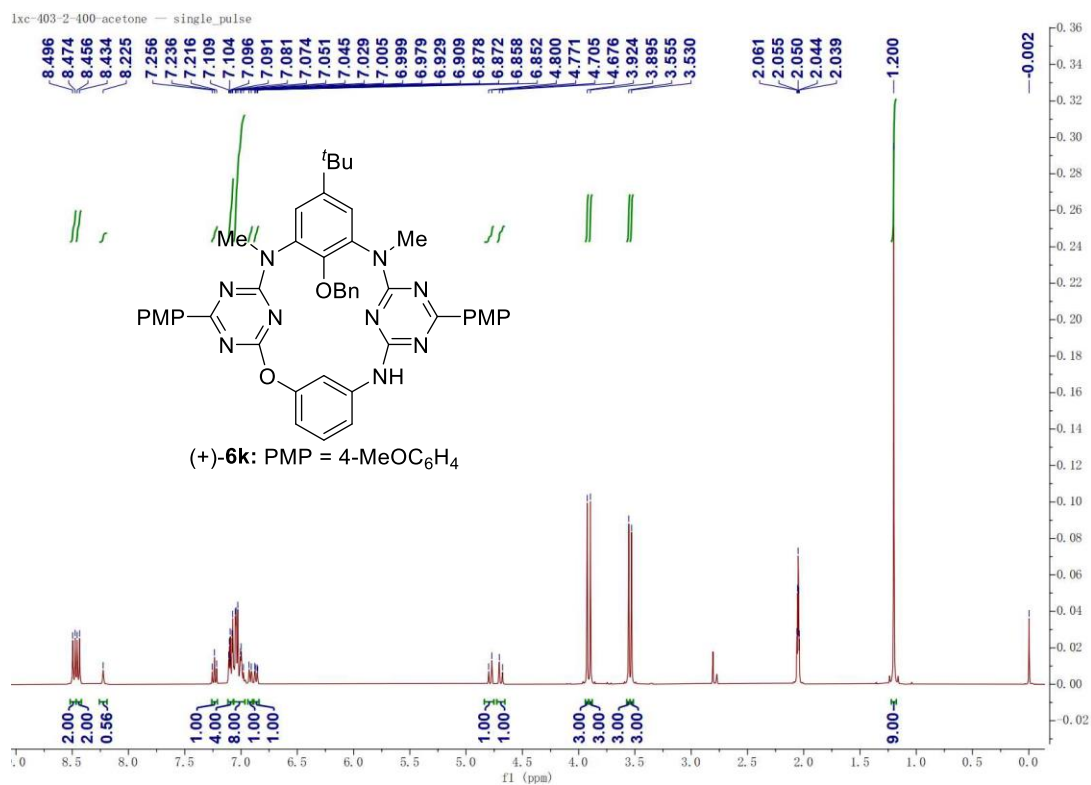

**6k:**  $^{13}\text{C}$  NMR, 100 MHz,  $\text{CDCl}_3$

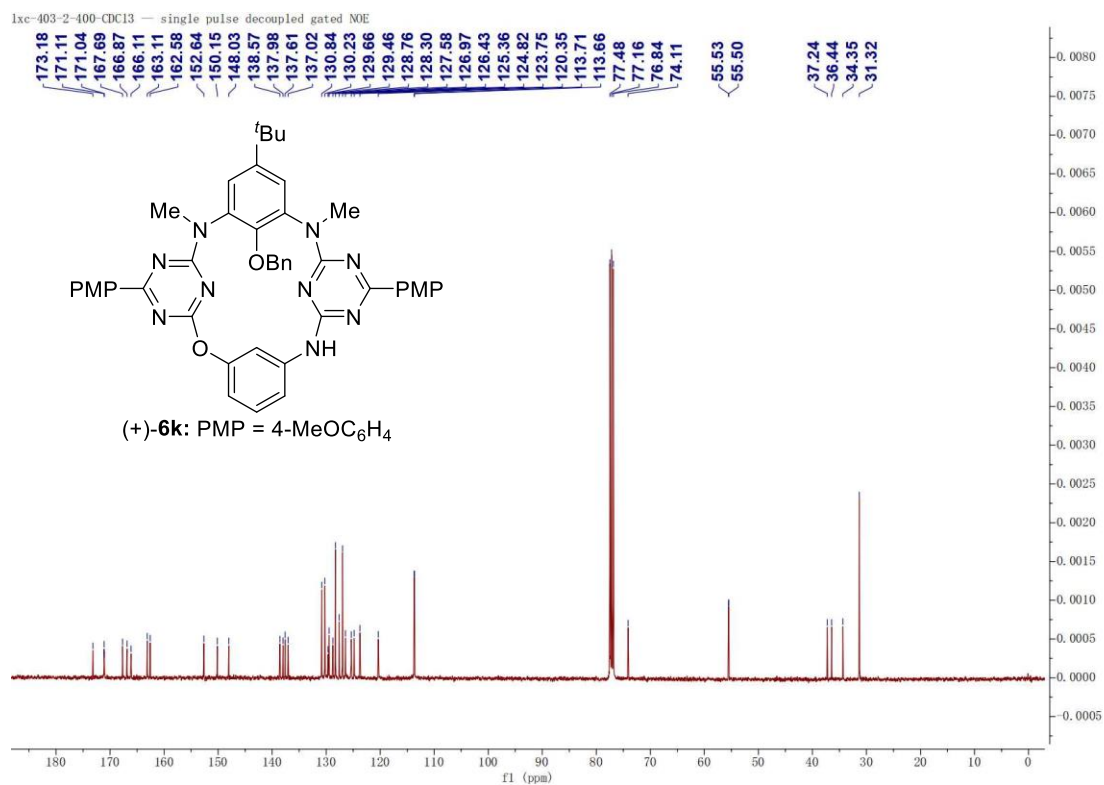

**6l:**  $^1\text{H}$  NMR, 400 MHz, acetone- $d_6$

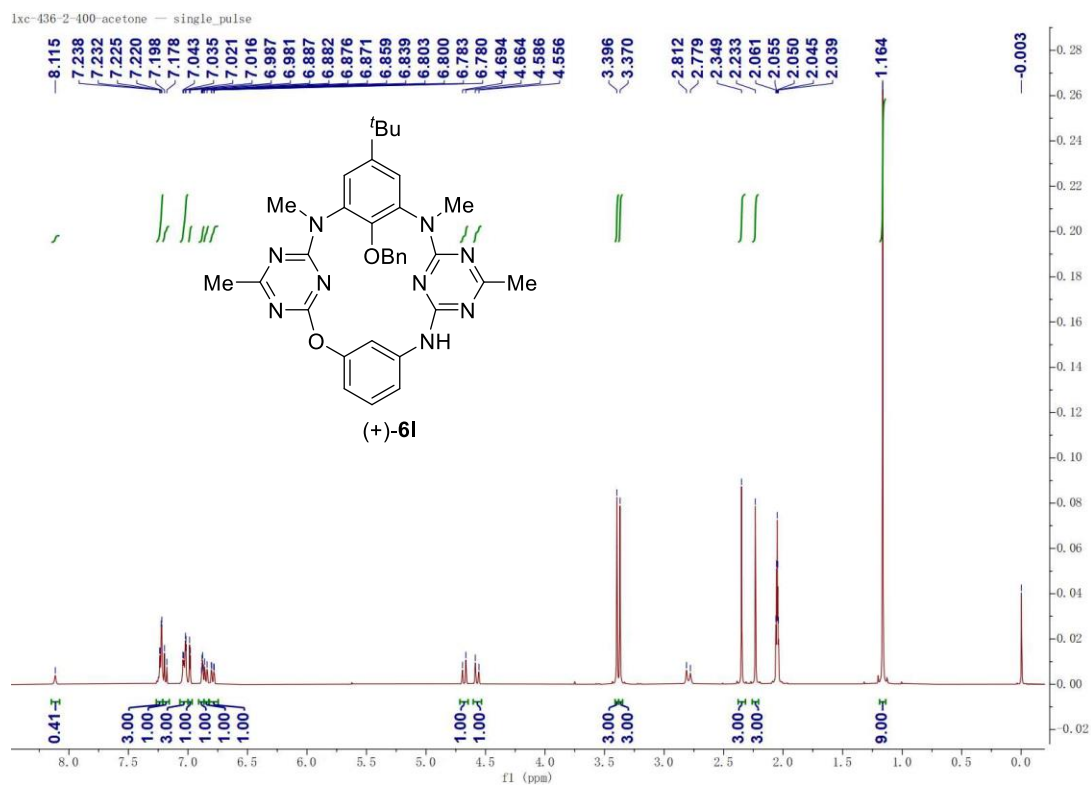

**6l:**  $^{13}\text{C}$  NMR, 150 MHz,  $\text{CDCl}_3$

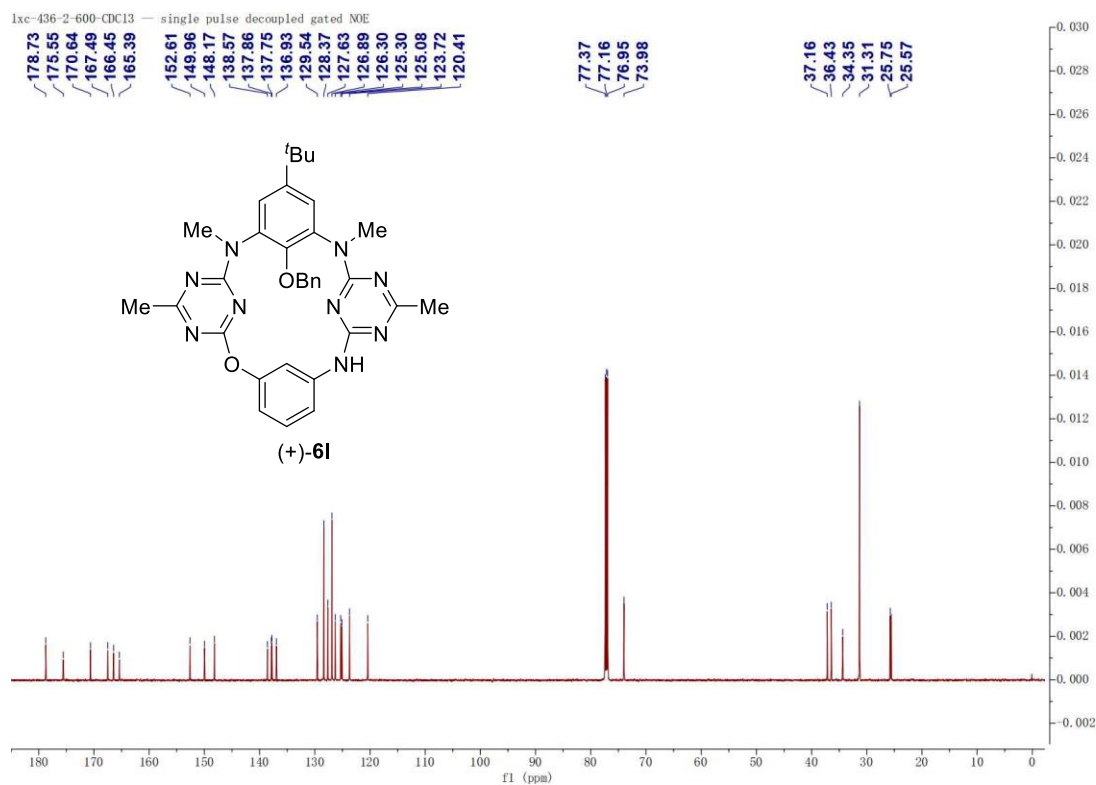

**8a:**  $^1\text{H}$  NMR, 600 MHz,  $\text{CDCl}_3$

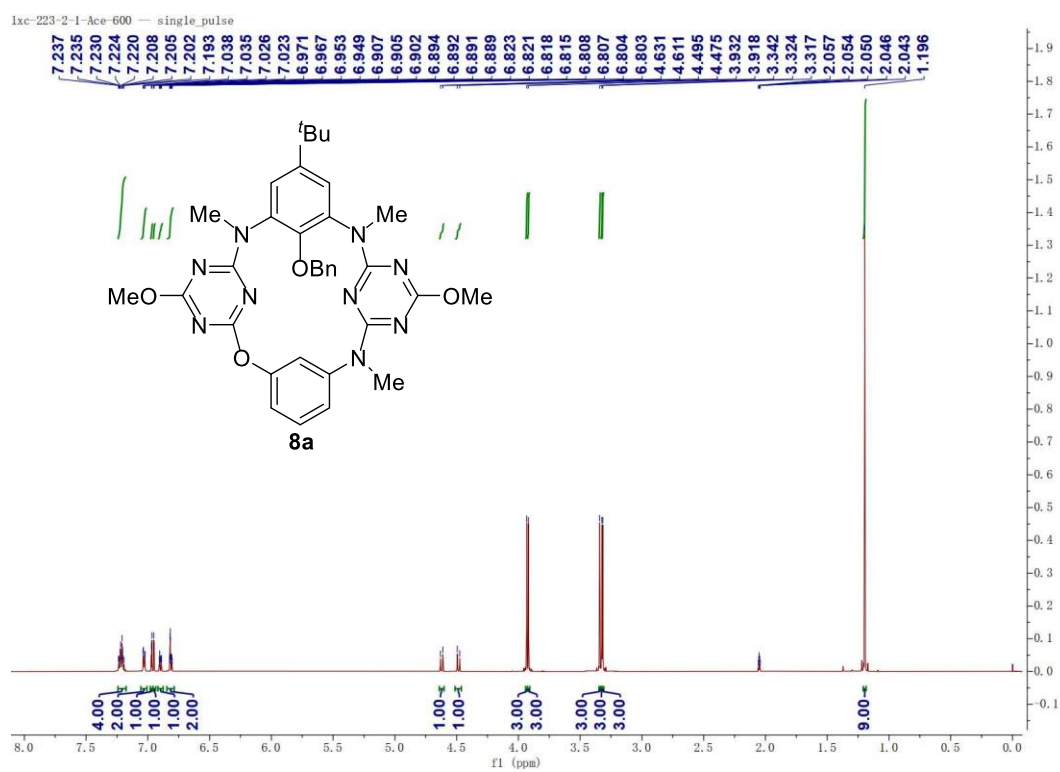

**8a:**  $^{13}\text{C}$  NMR, 100 MHz,  $\text{CDCl}_3$

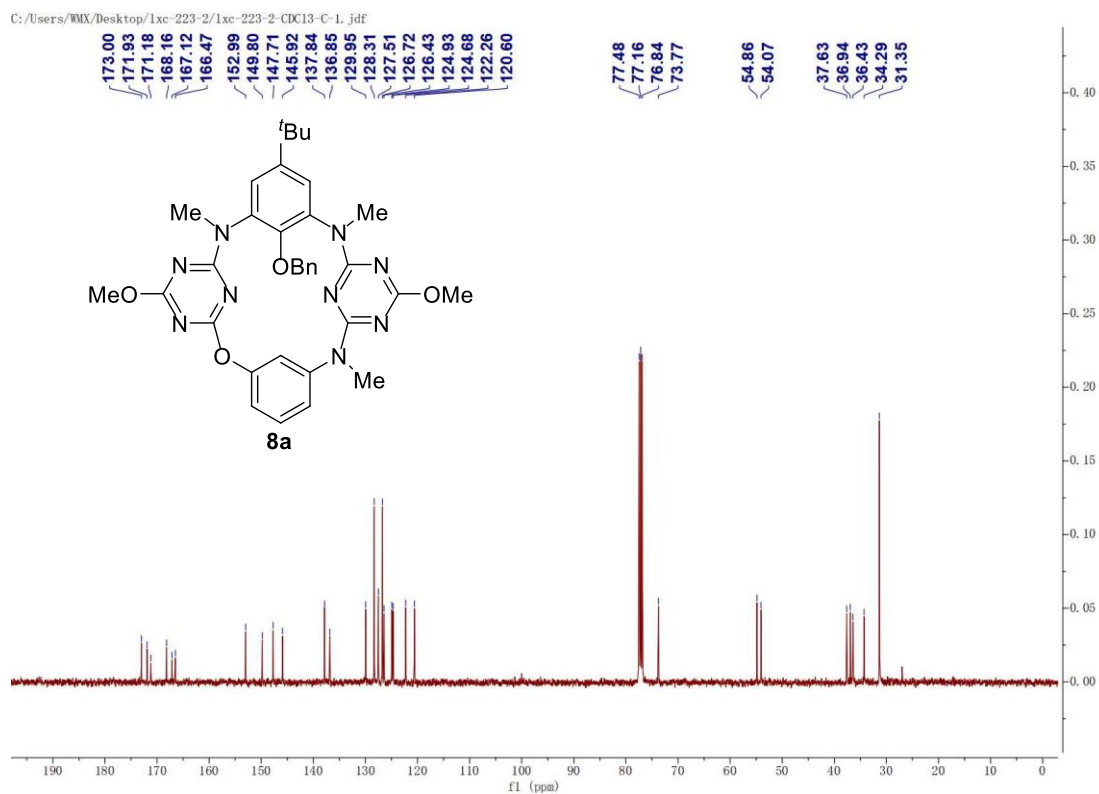

**8b**:  $^1\text{H}$  NMR, 600 MHz,  $\text{CDCl}_3$

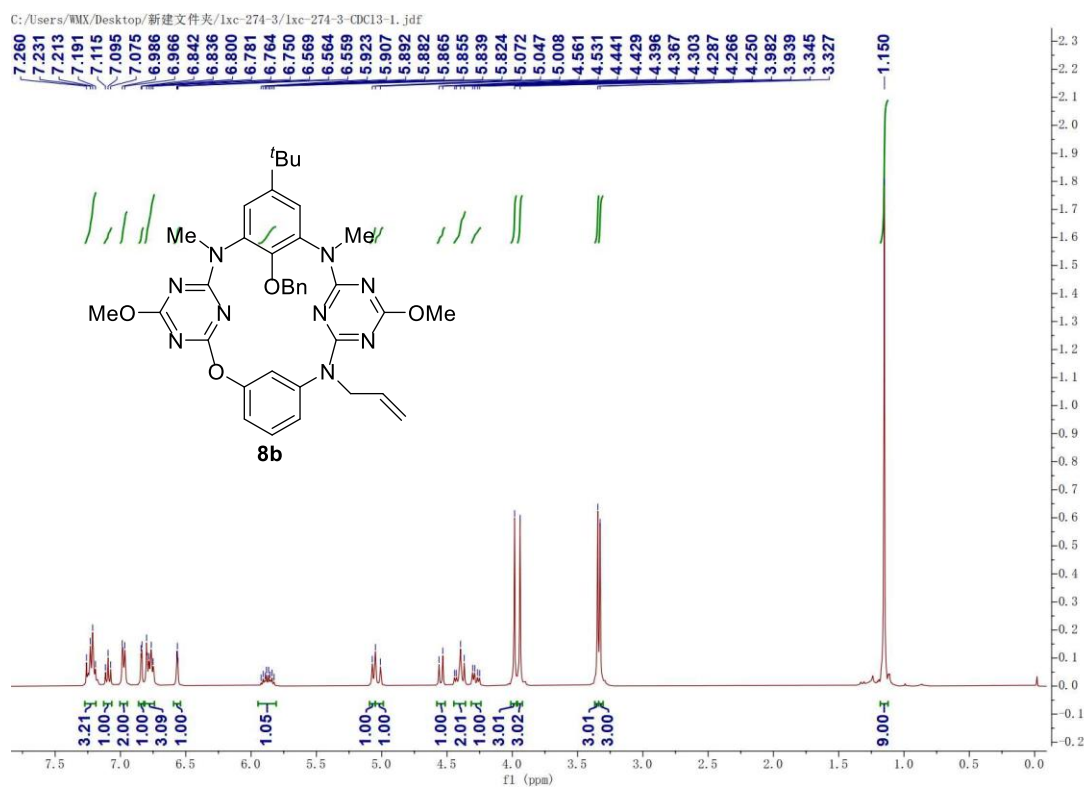

**8b**:  $^{13}\text{C}$  NMR, 100 MHz,  $\text{CDCl}_3$

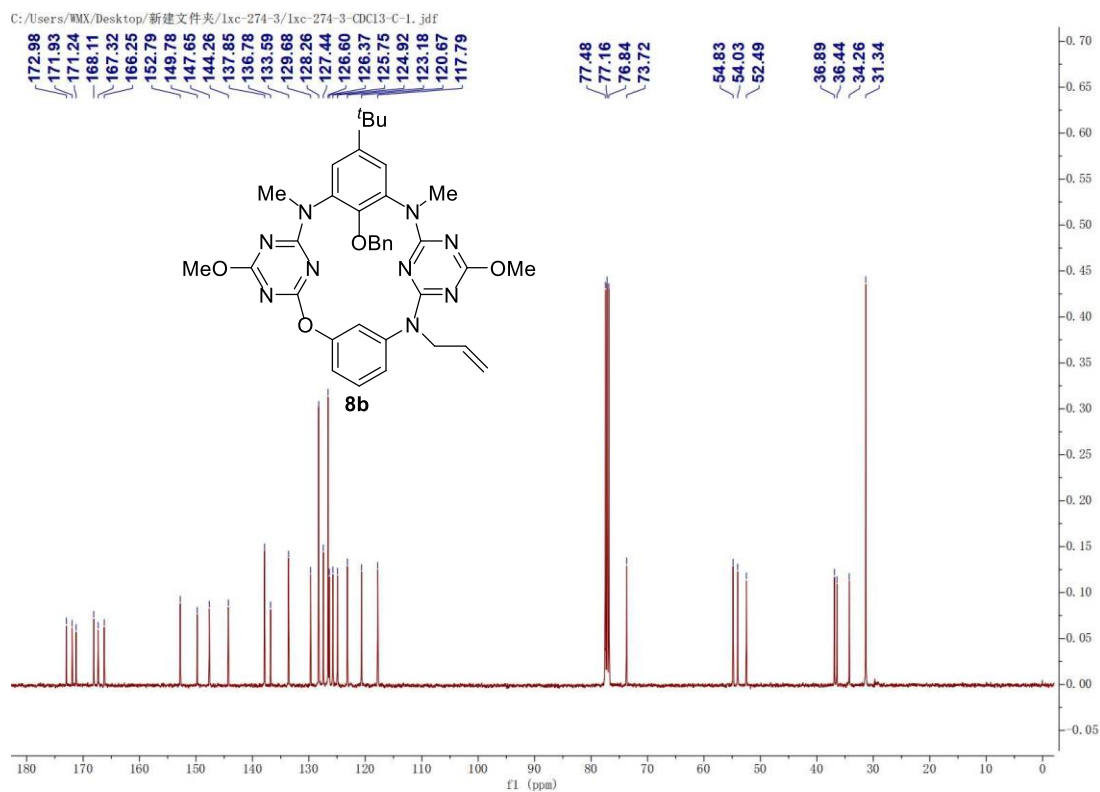

**8c**: <sup>1</sup>H NMR, 400 MHz, CDCl<sub>3</sub>

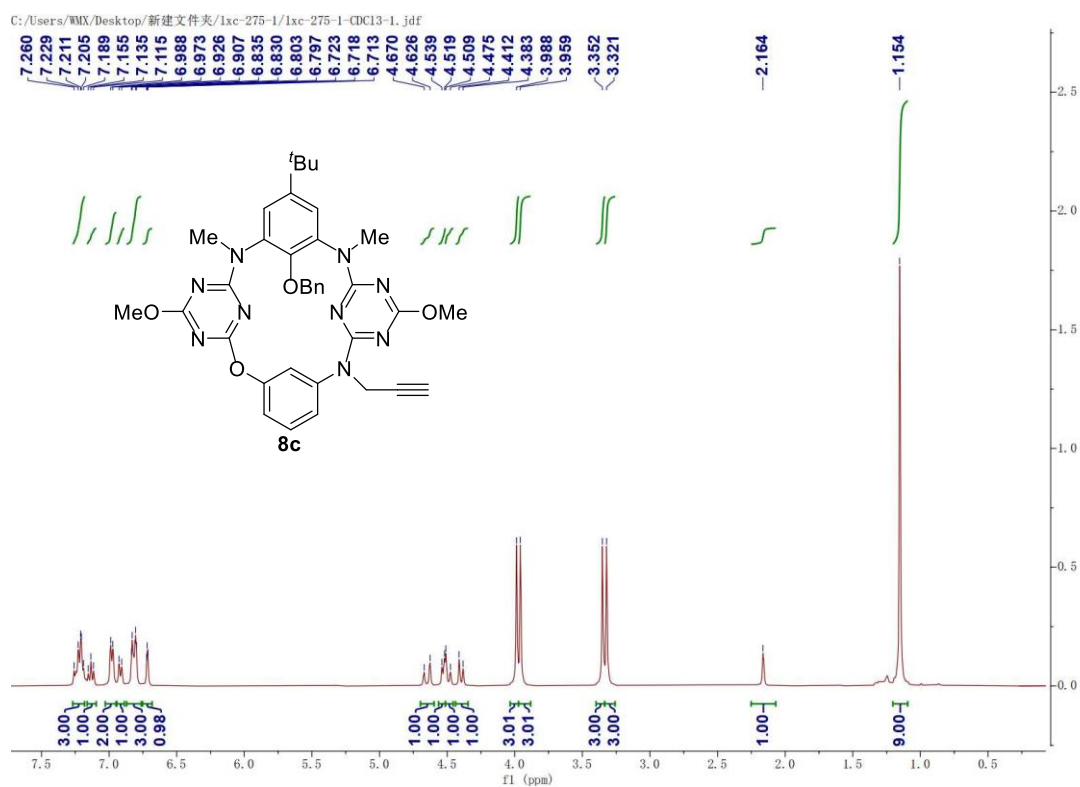

**8c**: <sup>13</sup>C NMR, 100 MHz, CDCl<sub>3</sub>



C:/Users/WMX/Desktop/新建文件夹/lxc-274-2/lxc-274-2-CDC13-C-1.jdf

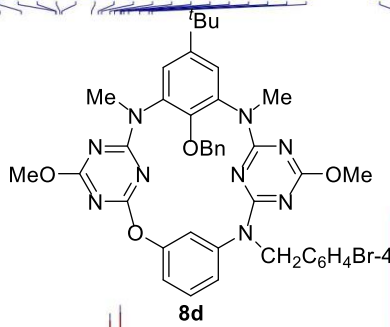

## 1xc-291-2 — single\_pulse

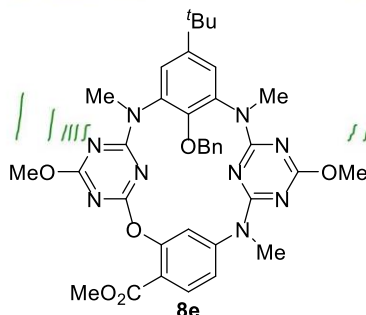

**8e:**  $^{13}\text{C}$  NMR, 100 MHz,  $\text{CDCl}_3$

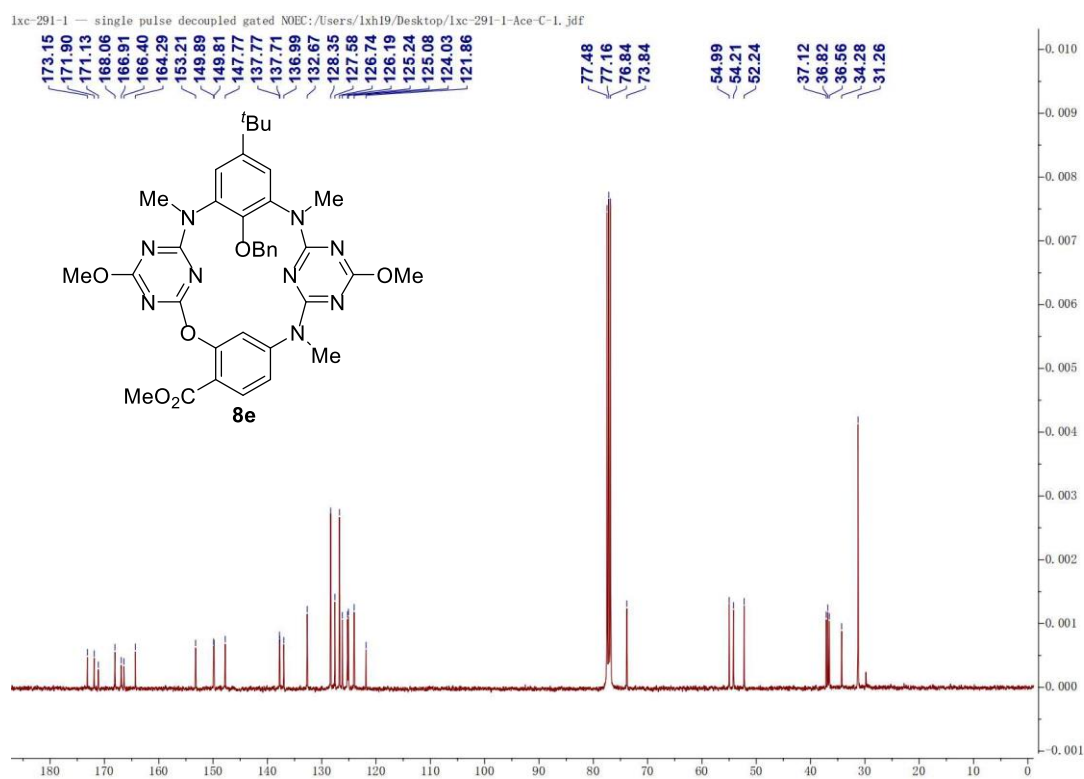

**8f:**  $^1\text{H}$  NMR, 600 MHz,  $\text{CDCl}_3$

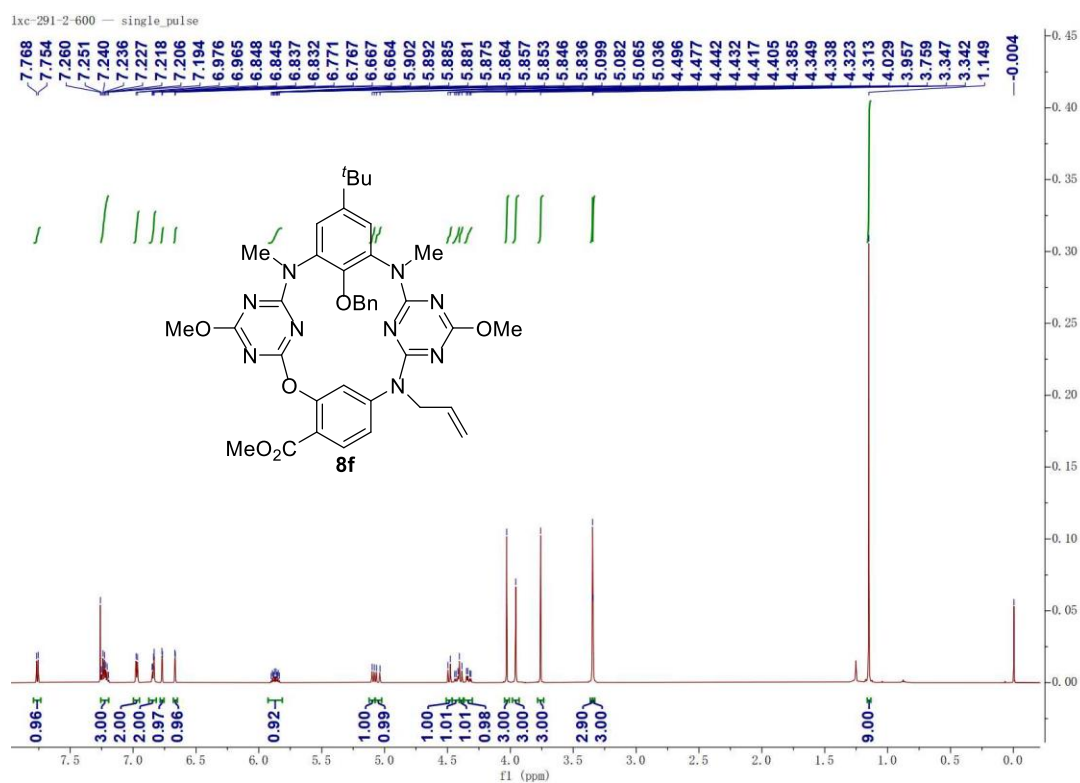

**8f:**  $^{13}\text{C}$  NMR, 100 MHz,  $\text{CDCl}_3$

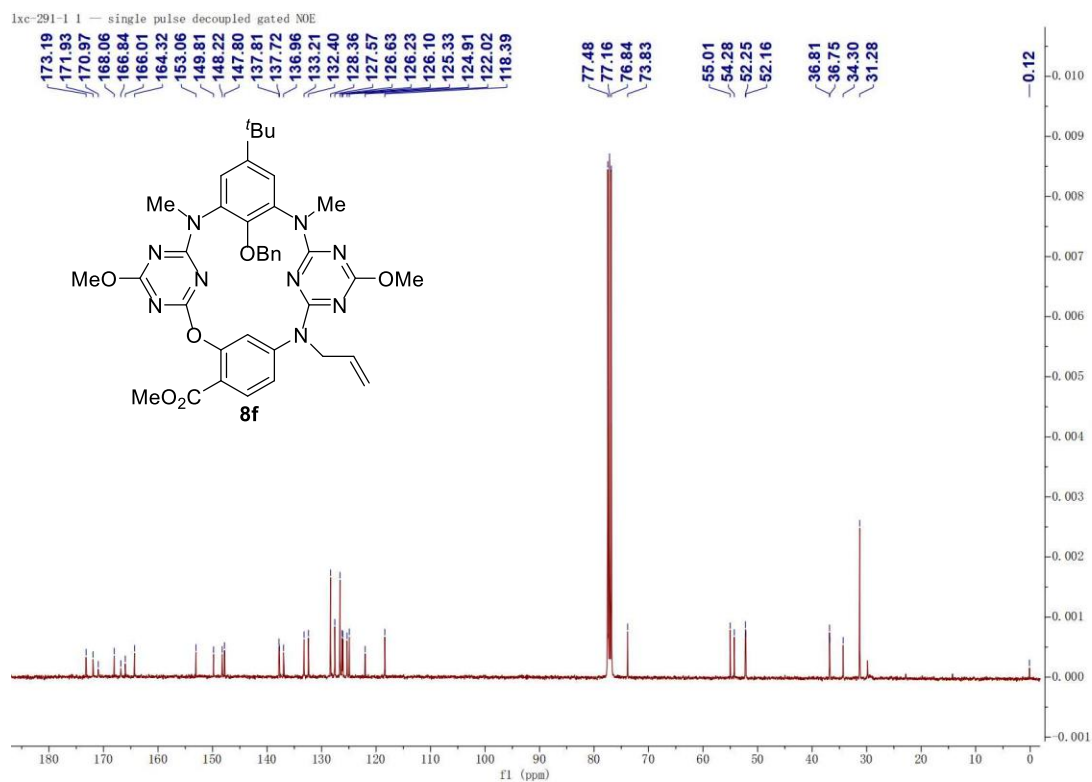

**8g**:  $^1\text{H}$  NMR, 400 MHz,  $\text{CDCl}_3$

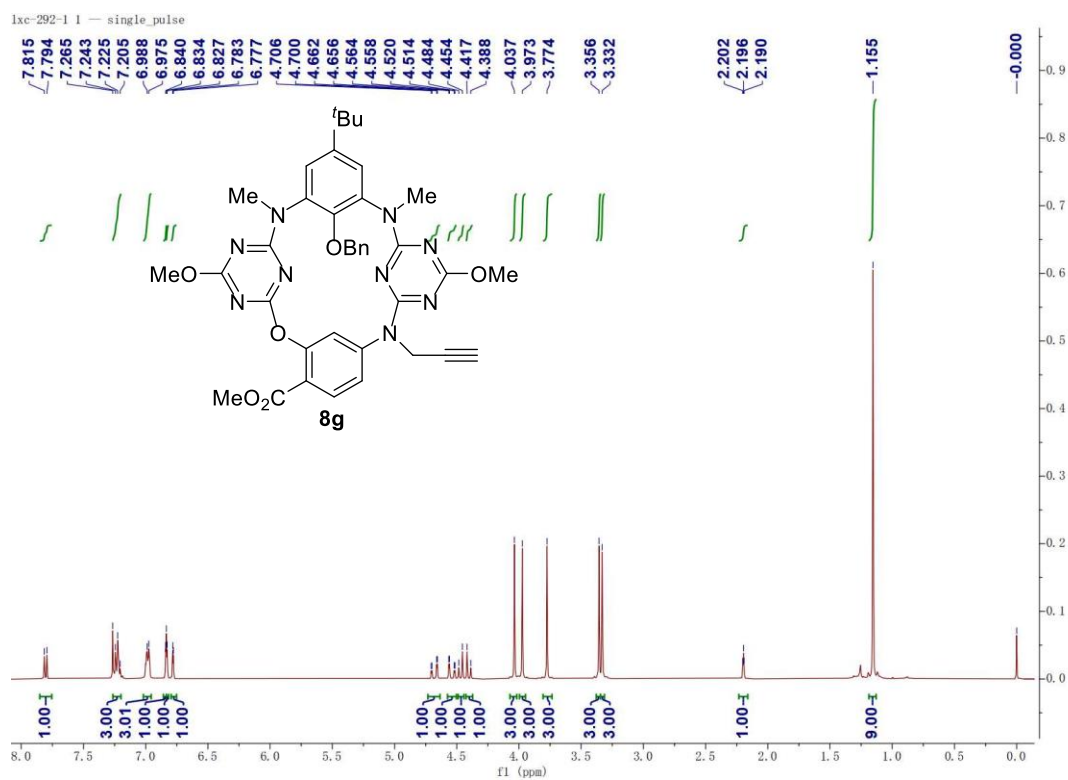

lxc-292-1-600 1 - single pulse decoupled gated NOE

Chemical structure of **8g** is shown. The structure is a macrocyclic dimer of 1,3,5-trimethyl-2-((4-methoxyphenyl)methyl)-1H-1,2,4-triazole. The structure features two triazole rings linked by a central oxygen atom, with various substituents including methyl groups, a benzyl group, a tert-butyl group, and a methoxycarbonyl group.

<sup>13</sup>C NMR spectrum (CDCl<sub>3</sub>) of compound **8g**. The spectrum shows peaks corresponding to the structure, with the following chemical shifts (ppm) labeled above the peaks:

173.20, 171.96, 171.16, 168.07, 167.14, 166.02, 164.30, 153.07, 149.86, 147.85, 147.52, 137.79, 137.70, 137.00, 132.48, 128.36, 127.55, 126.69, 126.16, 126.08, 125.39, 124.98, 122.51, 79.40, 77.38, 77.16, 76.95, 73.93, 72.43, 55.01, 54.34, 52.27, 38.47, 36.82, 36.70, 34.31, 31.29.

1xc-292-2 1 — single\_pulse

Chemical structure of compound **8h** is shown above the spectrum. The structure is a macrocyclic dimer of 1,3,5-trimethoxy-2-(4-(benzyloxy)-3-tert-butylphenyl)-1H-1,2,4-triazole. The macrocycle is formed by two triazole rings linked by an ether bridge. The phenyl rings are substituted with a tert-butyl group, a benzyloxy group, and a methoxy group. The macrocycle is terminated with a 4-bromophenyl group.

**1H NMR spectrum (CDCl<sub>3</sub>) data:**

| Chemical Shift (ppm) | Integration |
|----------------------|-------------|
| 7.706                | 0.92        |
| 7.685                | 2.00        |
| 7.357                | 3.10        |
| 7.337                | 2.00        |
| 7.289                | 2.00        |
| 7.249                | 2.00        |
| 7.232                | 1.00        |
| 7.080                | 1.00        |
| 7.060                | 1.00        |
| 6.960                | 1.00        |
| 6.944                | 1.00        |
| 6.836                | 1.00        |
| 6.759                | 1.00        |
| 6.647                | 1.00        |
| 6.627                | 1.00        |
| 6.497                | 1.00        |
| 4.988                | 1.00        |
| 4.950                | 1.00        |
| 4.927                | 1.00        |
| 4.890                | 1.00        |
| 4.896                | 1.00        |
| 4.467                | 1.00        |
| 4.395                | 1.00        |
| 4.366                | 1.00        |
| 4.024                | 1.00        |
| 3.970                | 1.00        |
| 3.746                | 1.00        |
| 3.345                | 1.00        |
| 1.142                | 9.00        |
| 0.000                | 0.00        |

**8h:**  $^{13}\text{C}$  NMR, 150 MHz,  $\text{CDCl}_3$

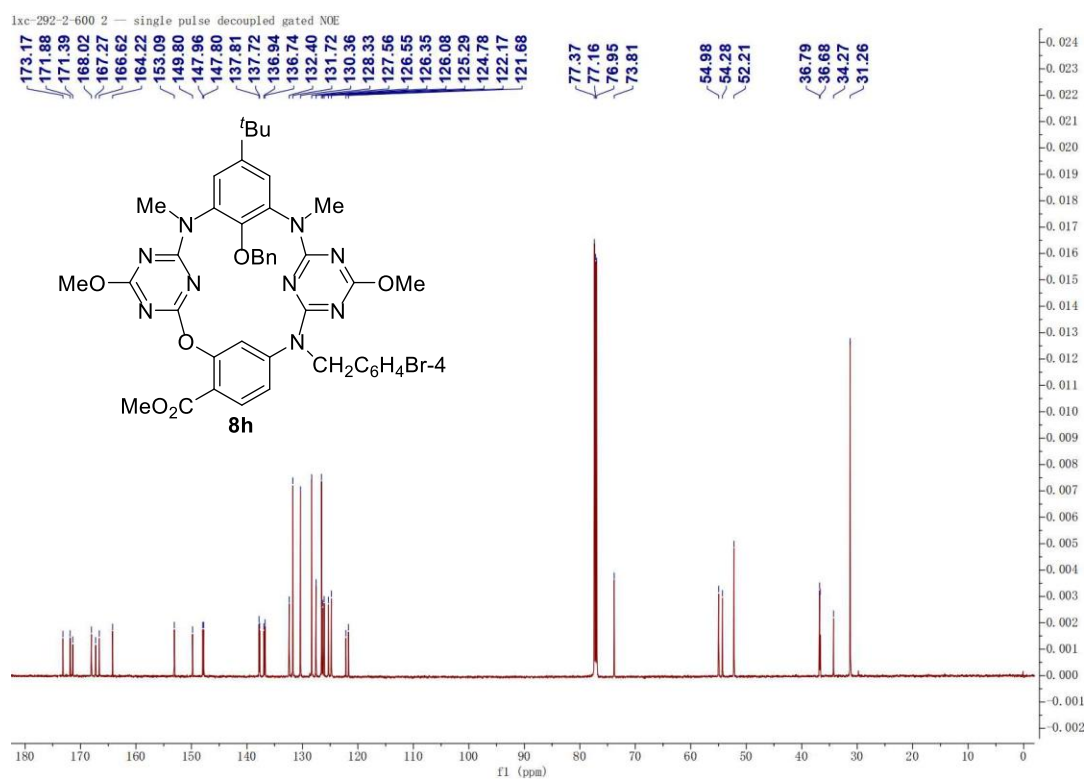

**9:**  $^1\text{H}$  NMR, 400 MHz,  $\text{CDCl}_3$

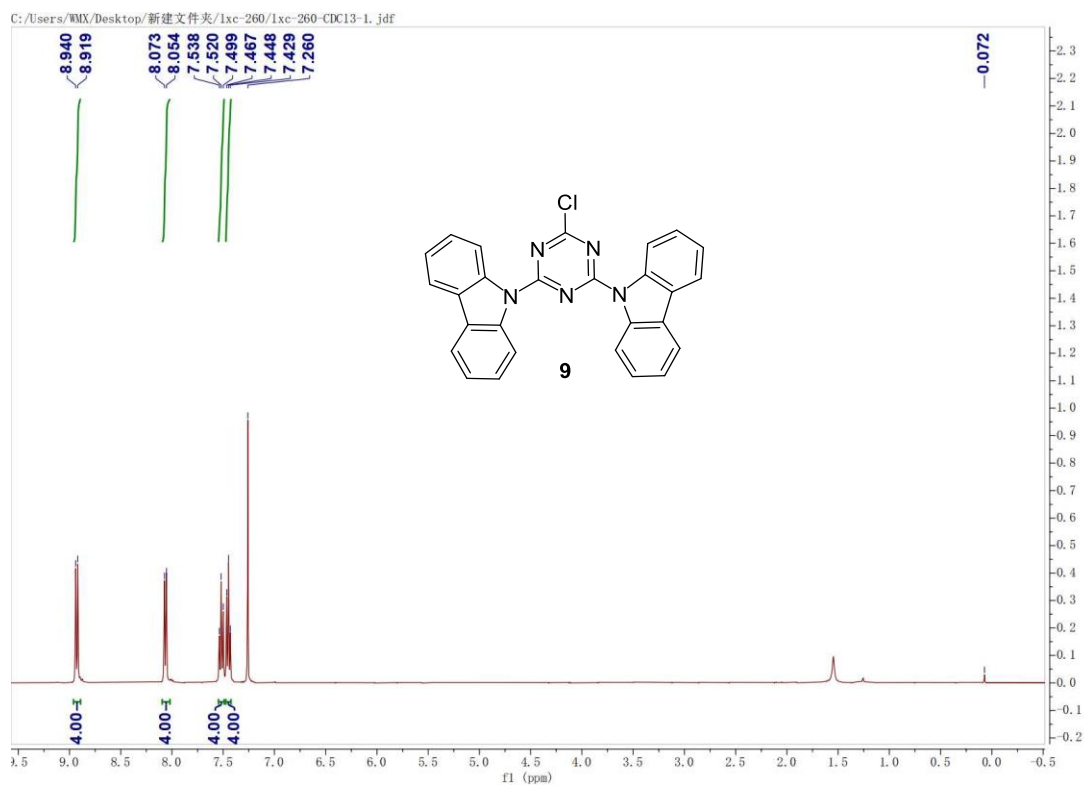

**9:**  $^{13}\text{C}$  NMR, 100 MHz,  $\text{CDCl}_3$

C:/Users/lxh19/Desktop/化合物数据/单体/NMR/lxc-260- $\text{CDCl}_3$ -C-1.jdf

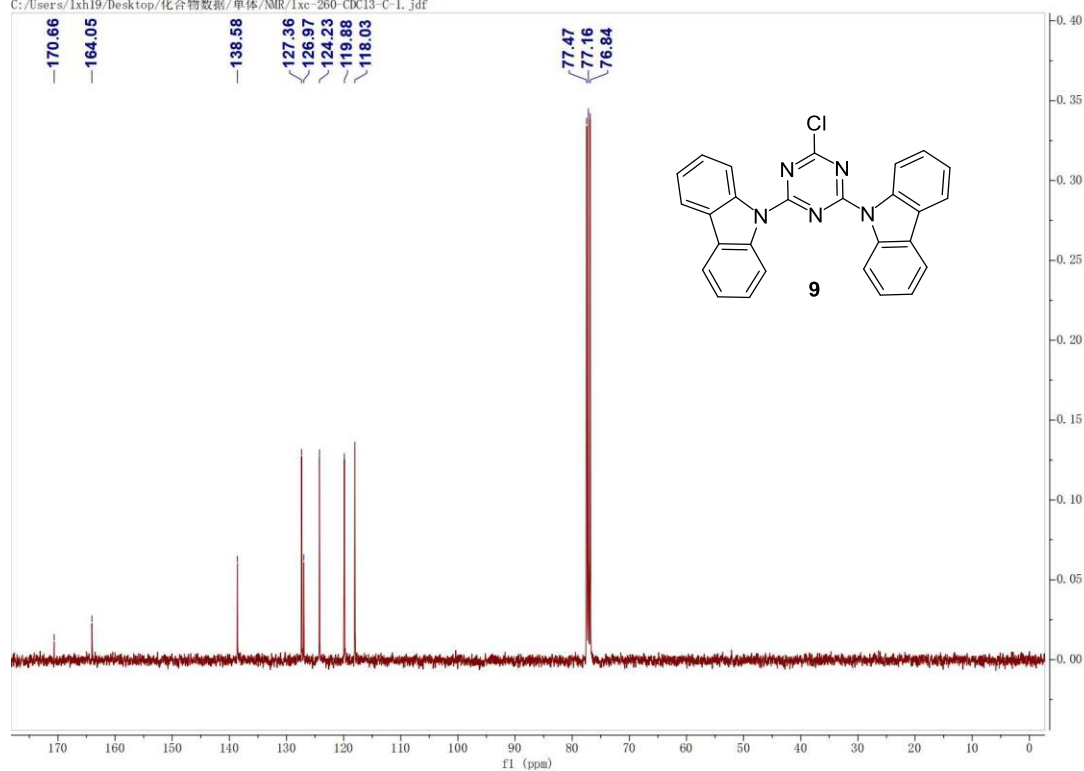

**10:**  $^1\text{H}$  NMR, 400 MHz,  $\text{CDCl}_3$

C:/Users/WMX/Desktop/新建文件夹/lxc-267-2/lxc-267-2- $\text{CDCl}_3$ -1.jdf

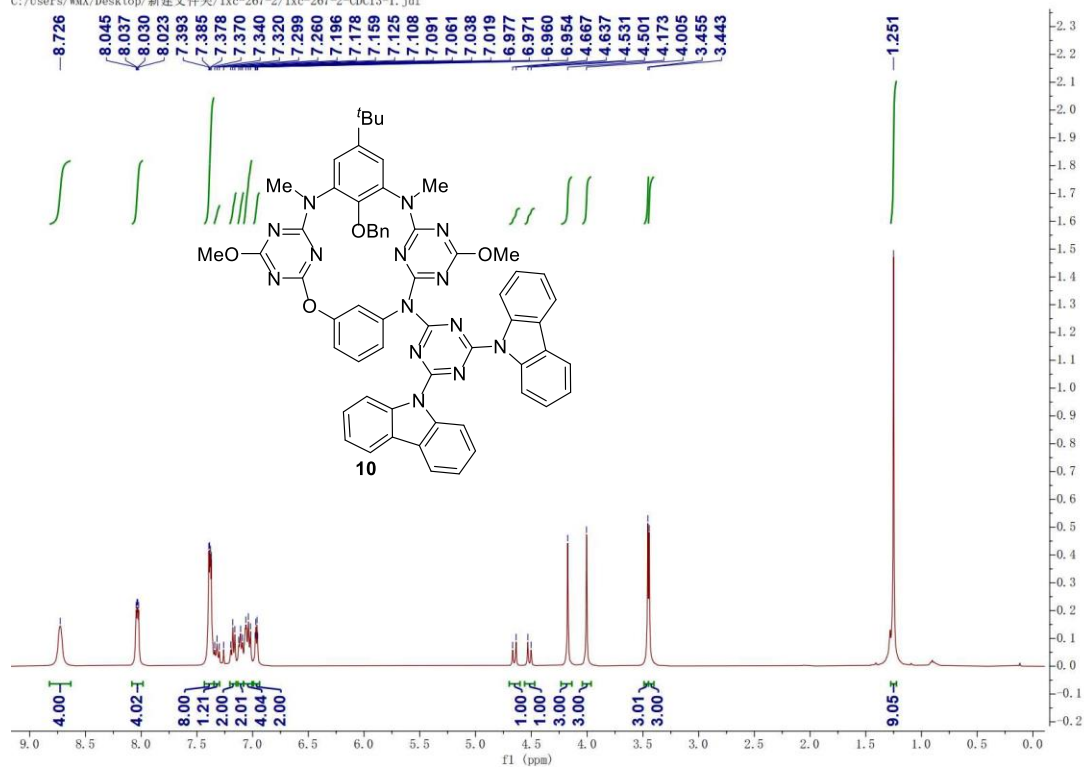

## 10: $^{13}\text{C}$ NMR, 100 MHz, $\text{CDCl}_3$

C:/Users/WMX/Desktop/新建文件夹/1xc-267-2/1xc-267-2-CDCl3-C-1\_.jdf

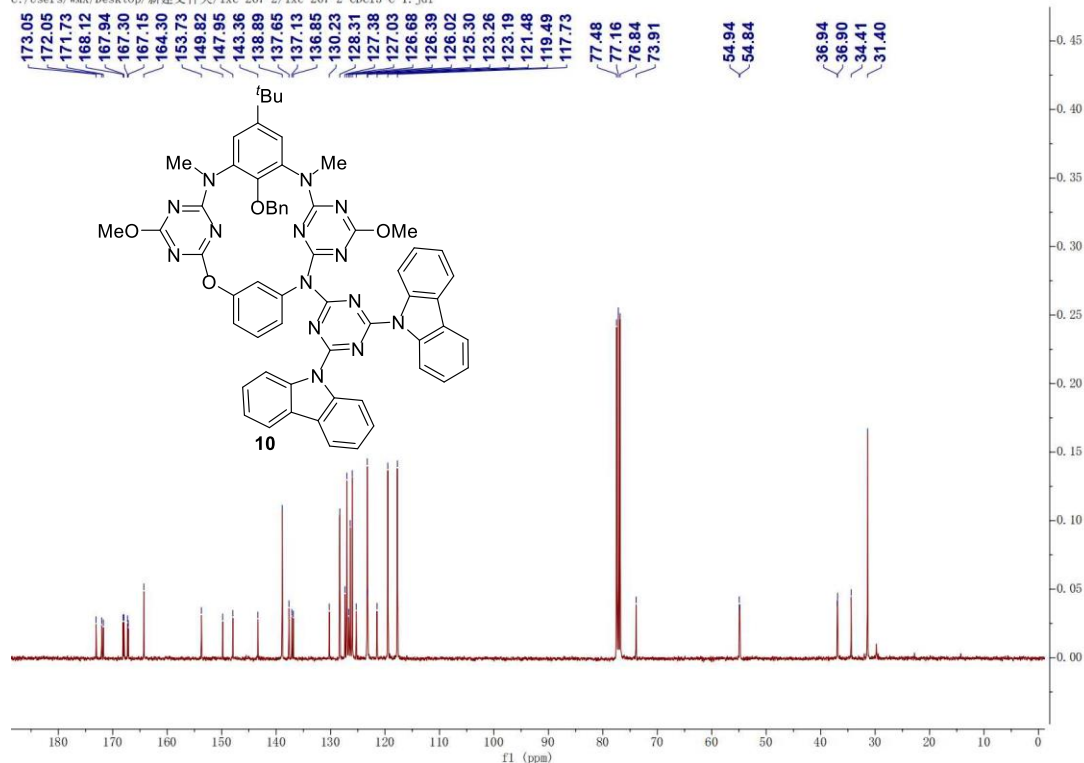

## 15. Details of theoretical calculations

### Mechanism of catalytic enantioselective macrocyclization

All geometrical optimizations were carried out with the Gaussian16 suite of program at the M06-2X/6-31G(d,p) level.

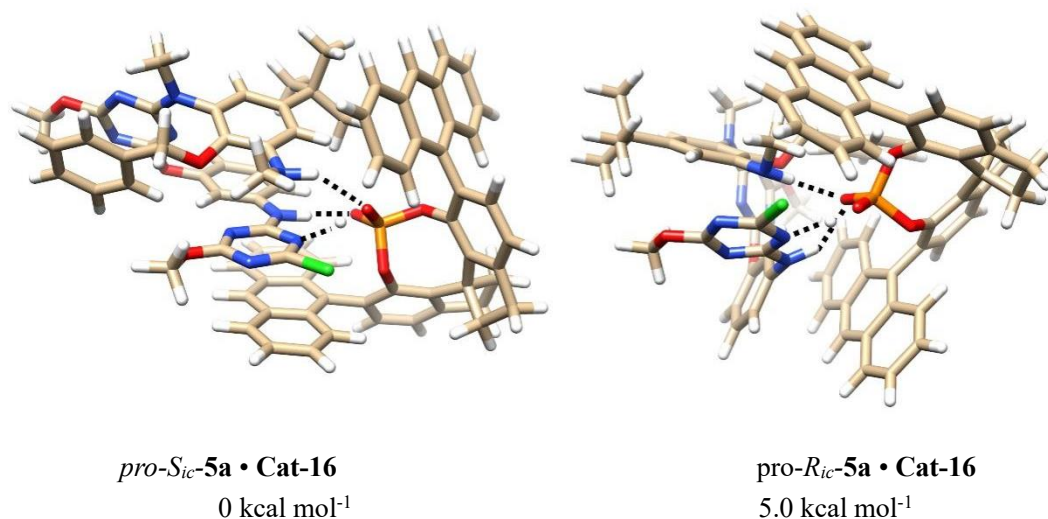

**Figure S28.** Optimized structures (at M06-2X/6-31G(d,p) level) of complexes between **Cat-16** and substrate **5a** which lead to the formation of *Sic-6a* (left) and *Ric-6a* (right), respectively. The zero point energy suggests that complex *pro-Sic-5a • Cat-16* (left) was favored. This was in line with

observed enantioselectivity.

### Geometrical coordinates of the optimized structures

**Table S10** Cartesian coordinates:

*pro-S<sub>ic</sub>*-**5a•Cat-16**

|   |             |             |             |
|---|-------------|-------------|-------------|
| C | 6.88890900  | 0.64274700  | 1.67649100  |
| C | 7.79131800  | -0.45324400 | 2.19153300  |
| C | 7.12632800  | -1.71323600 | 1.61492700  |
| C | 6.09164800  | 0.16761500  | 0.62884200  |
| H | 6.31095800  | -2.03222500 | 2.27307700  |
| C | 6.51164100  | -1.24732900 | 0.26290900  |
| C | 5.55159300  | -2.29175700 | -0.27162600 |
| C | 6.24384600  | -3.22607400 | -1.04428500 |
| C | 7.60047800  | -1.28020700 | -0.84609300 |
| C | 7.66400800  | -2.76048800 | -1.27465400 |
| C | 5.60200800  | -4.37075200 | -1.49831800 |
| C | 4.19295100  | -2.45644200 | -0.05334700 |
| C | 3.50823700  | -3.59236400 | -0.50434700 |
| C | 4.25439000  | -4.55533600 | -1.19922900 |
| H | 3.74066200  | -5.44788900 | -1.54290800 |
| H | 6.13605800  | -5.11147400 | -2.08571600 |
| C | 5.11720500  | 1.00273400  | 0.09613300  |
| C | 6.76496300  | 1.94630600  | 2.13545100  |
| C | 5.81921100  | 2.78043900  | 1.54816200  |
| H | 5.70515300  | 3.80506200  | 1.88901500  |
| C | 4.96917700  | 2.32392300  | 0.53418100  |
| H | 7.38760700  | 2.30887200  | 2.94765700  |
| C | 2.31928800  | -3.60236300 | 2.19864100  |
| C | 1.52020700  | -3.82273800 | 1.02874000  |
| C | 1.76511700  | -3.58946200 | 3.44423000  |
| C | 2.04781100  | -3.79726900 | -0.28106000 |
| C | 0.12341100  | -4.10048900 | 1.22351000  |
| C | 0.36799400  | -3.81081000 | 3.62557100  |
| H | 2.39146500  | -3.40647300 | 4.31123200  |
| C | 1.20403600  | -4.04885600 | -1.38857000 |
| C | -0.68329400 | -4.39770700 | 0.12724600  |
| C | -0.42210000 | -4.06927300 | 2.54676900  |
| H | -0.05756300 | -3.77058700 | 4.62318900  |
| C | 1.65322600  | -3.95774600 | -2.74799200 |
| C | -0.17142100 | -4.40063100 | -1.16896900 |
| H | -1.73658700 | -4.61880700 | 0.28515200  |
| H | -1.48811500 | -4.25013800 | 2.66370500  |
| C | 0.82958400  | -4.28385400 | -3.78565800 |
| H | 2.65716600  | -3.60024900 | -2.94410900 |

|   |             |             |             |
|---|-------------|-------------|-------------|
| C | -1.00375100 | -4.73137800 | -2.28505900 |
| C | -0.51402100 | -4.70062600 | -3.55442300 |
| H | 1.19365300  | -4.20356800 | -4.80527700 |
| H | -2.04042300 | -4.99215800 | -2.09132800 |
| H | -1.15357500 | -4.94731600 | -4.39565200 |
| H | 3.38524200  | -3.44246200 | 2.08706600  |
| C | 2.68630300  | 3.25511800  | 2.10260700  |
| C | 2.92968200  | 3.76027600  | 0.78201200  |
| C | 1.68566100  | 3.76533100  | 2.87777100  |
| C | 3.96253100  | 3.26369000  | -0.03938100 |
| C | 2.07280100  | 4.80388000  | 0.29366100  |
| C | 0.83426800  | 4.80221100  | 2.38710900  |
| H | 1.52475200  | 3.36763900  | 3.87635100  |
| C | 4.11241800  | 3.73961900  | -1.35825500 |
| C | 2.27134400  | 5.30824200  | -0.99102500 |
| C | 1.02314500  | 5.29960100  | 1.13332100  |
| H | 0.03311100  | 5.18011400  | 3.01480000  |
| C | 5.11850000  | 3.24457100  | -2.25011800 |
| C | 3.24630900  | 4.78062800  | -1.83621900 |
| H | 1.63753100  | 6.11473400  | -1.35164300 |
| H | 0.37709600  | 6.07972700  | 0.73985700  |
| C | 5.22786100  | 3.72220700  | -3.52219000 |
| H | 5.79589400  | 2.47288500  | -1.90201700 |
| C | 3.39796100  | 5.25854900  | -3.17619200 |
| C | 4.35215800  | 4.74171800  | -3.99883500 |
| H | 5.99053100  | 3.32465200  | -4.18380600 |
| H | 2.72655400  | 6.04059700  | -3.52022700 |
| H | 4.45541000  | 5.10430900  | -5.01627000 |
| H | 3.29934600  | 2.43953100  | 2.46952200  |
| O | 4.25204300  | 0.51871100  | -0.88332200 |
| O | 3.50638400  | -1.43311600 | 0.59281200  |
| P | 2.94375800  | -0.27563100 | -0.39160600 |
| O | 2.17018400  | -0.80118700 | -1.53589500 |
| O | 2.21946800  | 0.66988200  | 0.61821900  |
| H | 8.81225500  | -0.32988500 | 1.80979200  |
| H | 7.85330600  | -0.46407600 | 3.28287400  |
| H | 7.25976000  | -0.66610400 | -1.68648100 |
| H | 8.55869600  | -0.88338000 | -0.49895800 |
| H | 8.36960500  | -3.32593400 | -0.65401600 |
| H | 7.97828800  | -2.88639900 | -2.31415400 |
| O | -8.90585700 | 0.01789200  | -1.70228200 |
| O | -4.87740100 | -1.88974200 | -2.54993400 |
| O | -3.31019500 | -1.58140700 | 3.12886300  |
| O | -3.67717000 | 1.29306800  | 2.08549700  |

|   |             |             |             |
|---|-------------|-------------|-------------|
| N | -2.00382000 | -1.36938700 | 1.34121500  |
| N | -1.16356500 | -0.90090100 | 3.52583900  |
| N | -7.06604700 | 1.14430800  | -1.11825200 |
| N | -4.94243500 | 0.12514600  | -1.46411800 |
| N | -0.52832100 | -1.16197900 | -0.45773700 |
| H | 0.44494800  | -1.01468600 | -0.73202900 |
| N | -5.12373900 | 2.14011100  | -0.36939800 |
| N | -6.90987800 | -1.01654400 | -2.12489500 |
| N | -1.03349700 | 1.91766900  | 2.33756200  |
| N | 0.25730400  | -0.71044300 | 1.64387000  |
| C | -2.11749400 | -1.26143700 | 2.65666900  |
| C | -5.58909500 | -0.87518600 | -2.01628600 |
| C | -3.49304600 | -1.73975500 | -2.61339900 |
| C | -1.38303300 | -1.39144700 | -1.55377600 |
| C | -7.57543600 | 0.03699700  | -1.65077500 |
| C | -0.02634500 | -0.62885500 | 2.92513500  |
| C | -5.73497000 | 1.10721100  | -1.00520600 |
| C | -2.75550400 | -1.60165700 | -1.44439800 |
| H | -3.24971300 | -1.59784500 | -0.48640200 |
| C | -2.92168000 | 2.49348800  | -1.34279600 |
| H | -3.44876500 | 2.66648400  | -2.27461900 |
| C | -0.79497100 | -1.08700600 | 0.85303300  |
| C | -0.76536000 | -1.38167500 | -2.81316200 |
| H | 0.31009700  | -1.24100300 | -2.87554100 |
| C | -1.52993900 | 2.53763700  | -1.27977600 |
| C | -3.08071000 | 1.87325800  | 0.99352100  |
| C | -1.69023500 | 2.07512300  | 1.11285500  |
| C | -2.90944600 | -1.74703800 | -3.86993900 |
| H | -3.53268300 | -1.86793200 | -4.74831600 |
| C | -9.51059500 | -1.15937000 | -2.22480100 |
| H | -9.23254700 | -2.03294000 | -1.63018600 |
| H | -9.20280100 | -1.33127300 | -3.25817600 |
| C | -0.93898800 | 2.36607200  | -0.02745300 |
| H | 0.13861700  | 2.45885600  | 0.09611700  |
| C | -3.69654600 | 2.16658000  | -0.23024700 |
| C | -1.52821600 | -1.57660300 | -3.95427900 |
| H | -1.04047000 | -1.58478100 | -4.92382900 |
| C | -0.68491300 | 2.86288100  | -2.51324000 |
| C | -5.90259200 | 3.34382200  | -0.09912200 |
| H | -6.32389000 | 3.75131500  | -1.02298800 |
| H | -5.23847700 | 4.08174000  | 0.35104500  |
| H | -6.73319700 | 3.11493300  | 0.57552600  |
| C | 0.73043400  | 2.27910700  | -2.38247300 |
| H | 1.28954400  | 2.71102800  | -1.54621700 |

|    |              |             |             |
|----|--------------|-------------|-------------|
| H  | 1.30401700   | 2.49167400  | -3.29110200 |
| H  | 0.69742400   | 1.19294300  | -2.24537200 |
| C  | -1.32256400  | 2.28244700  | -3.78396300 |
| H  | -1.49811800  | 1.20779900  | -3.67781300 |
| H  | -0.65383100  | 2.44363900  | -4.63572900 |
| H  | -2.27438100  | 2.76523300  | -4.02347600 |
| C  | -0.60545400  | 4.39290400  | -2.64153600 |
| H  | -1.59519500  | 4.81599500  | -2.84300000 |
| H  | 0.06968600   | 4.67865400  | -3.45719700 |
| H  | -0.23228000  | 4.82983700  | -1.71156400 |
| C  | -4.95704100  | 1.68987100  | 2.54368700  |
| H  | -5.18255600  | 2.71365400  | 2.22526700  |
| H  | -4.88224700  | 1.70490200  | 3.63994700  |
| C  | -1.62832700  | 2.42831300  | 3.56444300  |
| H  | -2.28141000  | 1.68237400  | 4.02252200  |
| H  | -2.20825600  | 3.34829100  | 3.40072100  |
| H  | -0.82013500  | 2.64658500  | 4.26743900  |
| C  | -3.57175200  | -1.33014100 | 4.50598600  |
| H  | -4.62470100  | -1.57164400 | 4.64223800  |
| H  | -3.38495400  | -0.27978300 | 4.74212500  |
| H  | -0.06624600  | 2.21002200  | 2.24657400  |
| Cl | 1.26857000   | -0.06734500 | 3.94174800  |
| H  | -10.58370000 | -0.98200800 | -2.16770600 |
| H  | -2.94115200  | -1.95549400 | 5.14132700  |
| C  | -6.05768800  | 0.73876100  | 2.12773100  |
| C  | -7.39026800  | 1.10139700  | 2.32844400  |
| C  | -5.76192600  | -0.50014200 | 1.55924000  |
| C  | -8.41969800  | 0.24208000  | 1.95703800  |
| H  | -7.62590200  | 2.06883600  | 2.76822800  |
| C  | -6.79383000  | -1.36249900 | 1.19353400  |
| H  | -4.72488600  | -0.77037100 | 1.38826400  |
| C  | -8.12301000  | -0.99468100 | 1.39041400  |
| H  | -9.45252300  | 0.54288800  | 2.09900400  |
| H  | -6.55626200  | -2.31895500 | 0.73695400  |
| H  | -8.92516300  | -1.66414500 | 1.09513100  |
| H  | 7.81098200   | -2.55621700 | 1.48801200  |
| H  | 1.45539900   | 0.15645600  | 1.08376900  |

**Table S11** Cartesian coordinates:

*pro-R<sub>ic</sub>-5a•Cat-16*

|   |             |             |             |
|---|-------------|-------------|-------------|
| O | -5.96301700 | -3.38229300 | -3.33121300 |
| O | -5.14579700 | -2.11944100 | 0.92698400  |
| O | -2.43505800 | 4.16998800  | 3.26125100  |
| O | -2.12001100 | 0.23907200  | -1.45659300 |

|   |             |             |             |
|---|-------------|-------------|-------------|
| N | -1.73492300 | 2.01713800  | 3.03816100  |
| N | -0.23523800 | 3.86015000  | 2.95465700  |
| N | -5.30790000 | -1.27420200 | -2.97079200 |
| N | -4.82753100 | -0.57305000 | -0.73714700 |
| N | -0.98112600 | -0.07461600 | 2.46537900  |
| H | -0.32525200 | -0.59536400 | 1.88327200  |
| N | -4.60981400 | 0.87103300  | -2.52766100 |
| N | -5.54935600 | -2.79802200 | -1.15893100 |
| N | -0.69623100 | 2.08049000  | 0.07440900  |
| N | 0.57655200  | 1.65144500  | 2.62045200  |
| C | -1.45195000 | 3.30006900  | 3.08243400  |
| C | -5.14905500 | -1.79142200 | -0.37446400 |
| C | -4.34492500 | -1.49804700 | 1.86475600  |
| C | -2.29851200 | -0.58374100 | 2.67029300  |
| C | -5.60149800 | -2.45885500 | -2.44298000 |
| C | 0.70385700  | 2.96655700  | 2.76352800  |
| C | -4.91769300 | -0.36437700 | -2.06736100 |
| C | -3.06533100 | -1.01157900 | 1.59110300  |
| H | -2.67015100 | -0.97164100 | 0.57940700  |
| C | -4.48206400 | 3.04930300  | -1.43332700 |
| H | -5.47069500 | 3.25972600  | -1.83095000 |
| C | -0.70884100 | 1.21937500  | 2.70834300  |
| C | -2.78161700 | -0.63416000 | 3.97827800  |
| H | -2.14162700 | -0.30271200 | 4.78869400  |
| C | -3.78910000 | 4.00347200  | -0.67595700 |
| C | -2.66427100 | 1.47413200  | -1.19366200 |
| C | -1.96027700 | 2.40545500  | -0.42516400 |
| C | -4.85395400 | -1.53726100 | 3.15616500  |
| H | -5.85066400 | -1.93549100 | 3.30878500  |
| C | -6.26231500 | -4.67997300 | -2.82578400 |
| H | -5.39154100 | -5.11203700 | -2.32604500 |
| H | -7.08881700 | -4.63908100 | -2.11366600 |
| C | -2.53387300 | 3.66018000  | -0.17660600 |
| H | -1.96779700 | 4.35526700  | 0.43661800  |
| C | -3.92805800 | 1.80163000  | -1.68913600 |
| C | -4.06527400 | -1.10134000 | 4.21591600  |
| H | -4.45240500 | -1.14008800 | 5.22865100  |
| C | -4.42794700 | 5.37242600  | -0.42223500 |
| C | -4.69468100 | 1.13962400  | -3.95979500 |
| H | -5.66955800 | 0.83442000  | -4.34082900 |
| H | -4.55259900 | 2.20966200  | -4.10810500 |
| H | -3.92617000 | 0.58646500  | -4.51197600 |
| C | -3.54909600 | 6.26172700  | 0.46336200  |
| H | -2.58727900 | 6.47511600  | -0.01327300 |

|    |             |             |             |
|----|-------------|-------------|-------------|
| H  | -4.05419000 | 7.21660900  | 0.63741200  |
| H  | -3.34820300 | 5.80097600  | 1.43605500  |
| C  | -5.78864800 | 5.18907100  | 0.27002700  |
| H  | -5.66986500 | 4.67970600  | 1.23083600  |
| H  | -6.25229800 | 6.16422400  | 0.45262400  |
| H  | -6.47773600 | 4.59812100  | -0.33938700 |
| C  | -4.63957400 | 6.08424400  | -1.76929100 |
| H  | -5.30094900 | 5.51123800  | -2.42574900 |
| H  | -5.09166500 | 7.06905400  | -1.61044300 |
| H  | -3.68545300 | 6.22244600  | -2.28672600 |
| C  | -1.11091400 | 0.25160000  | -2.47702300 |
| H  | -1.50010200 | 0.81167300  | -3.33991300 |
| H  | -0.20404400 | 0.75822200  | -2.12245400 |
| C  | 0.40775400  | 2.91738200  | -0.38590600 |
| H  | 0.44649100  | 2.98528300  | -1.48127900 |
| H  | 0.32566700  | 3.93032700  | 0.02145900  |
| H  | 1.35454000  | 2.49551400  | -0.02982900 |
| C  | -3.76023100 | 3.63159200  | 3.28596100  |
| H  | -4.41247200 | 4.49057200  | 3.43920600  |
| H  | -3.97913600 | 3.13561600  | 2.33584500  |
| H  | -0.48511300 | 1.09400900  | -0.06506900 |
| Cl | 2.32341500  | 3.56998600  | 2.65429300  |
| H  | -6.53532500 | -5.27209100 | -3.69780000 |
| H  | -3.86909800 | 2.91047100  | 4.09796700  |
| C  | -0.79393600 | -1.16717000 | -2.85868100 |
| C  | 0.52654400  | -1.61355400 | -2.88963900 |
| C  | -1.82366800 | -2.03893200 | -3.21722400 |
| C  | 0.81432100  | -2.91996900 | -3.27791900 |
| H  | 1.32656400  | -0.93736100 | -2.59945400 |
| C  | -1.53620600 | -3.34685100 | -3.59679800 |
| H  | -2.85250200 | -1.68847200 | -3.20377600 |
| C  | -0.21513000 | -3.79216300 | -3.62297100 |
| H  | 1.84434300  | -3.26070300 | -3.29281200 |
| H  | -2.34569300 | -4.01535700 | -3.87649000 |
| H  | 0.01135500  | -4.81388800 | -3.91250300 |
| C  | 6.59736500  | -0.95463000 | -0.86348100 |
| C  | 7.30170400  | -2.27961600 | -0.68882500 |
| C  | 6.13356800  | -3.23047100 | -0.37957600 |
| C  | 5.21560000  | -1.14113100 | -0.98312200 |
| H  | 5.90402400  | -3.20265500 | 0.69097500  |
| C  | 4.93188400  | -2.62168900 | -1.15508800 |
| C  | 3.63256700  | -3.29344900 | -0.76788100 |
| C  | 3.43631800  | -4.42550200 | -1.56283500 |
| C  | 5.02015000  | -3.03577600 | -2.65252900 |

|   |             |             |             |
|---|-------------|-------------|-------------|
| C | 4.44876100  | -4.46465400 | -2.68415700 |
| C | 2.39480400  | -5.30149400 | -1.29413000 |
| C | 2.72532200  | -2.99255000 | 0.23799100  |
| C | 1.66287900  | -3.85405800 | 0.53812000  |
| C | 1.53898500  | -5.01865400 | -0.23705700 |
| H | 0.72467900  | -5.69707500 | -0.00517800 |
| H | 2.24084500  | -6.18849900 | -1.90154800 |
| C | 4.37874700  | -0.03094000 | -1.01384100 |
| C | 7.14986200  | 0.31622500  | -0.90862600 |
| C | 6.30255300  | 1.40706500  | -1.05362300 |
| H | 6.71325500  | 2.40962900  | -1.11828000 |
| C | 4.90735200  | 1.26616800  | -1.07857500 |
| H | 8.22377900  | 0.45932200  | -0.83827200 |
| C | 2.49187100  | -3.46294600 | 3.37042500  |
| C | 1.11235300  | -3.53280600 | 2.98516700  |
| C | 2.85668700  | -3.31803900 | 4.67590400  |
| C | 0.68515100  | -3.64732200 | 1.64355300  |
| C | 0.13211900  | -3.53683200 | 4.03800000  |
| C | 1.87528800  | -3.24729300 | 5.70765800  |
| H | 3.90843700  | -3.26038300 | 4.93690000  |
| C | -0.69266800 | -3.77394100 | 1.34642100  |
| C | -1.20560100 | -3.78308300 | 3.73405400  |
| C | 0.55618800  | -3.36579800 | 5.39430200  |
| H | 2.18763000  | -3.11943700 | 6.73892200  |
| C | -1.20474000 | -3.76531300 | 0.00509900  |
| C | -1.63270500 | -3.94712300 | 2.41723700  |
| H | -1.93091700 | -3.86176800 | 4.54089400  |
| H | -0.20603400 | -3.34658900 | 6.16850300  |
| C | -2.51333600 | -4.06715800 | -0.24179300 |
| H | -0.54350200 | -3.50083900 | -0.81531500 |
| C | -2.98422900 | -4.30114800 | 2.11069100  |
| C | -3.40567500 | -4.39887900 | 0.81922200  |
| H | -2.88572900 | -4.04224400 | -1.26142000 |
| H | -3.66894400 | -4.47188200 | 2.93705200  |
| H | -4.43587500 | -4.64583200 | 0.58628900  |
| H | 3.25808400  | -3.52874500 | 2.60793900  |
| C | 5.08256800  | 3.39433600  | 0.91153100  |
| C | 4.27864300  | 3.54551600  | -0.26727200 |
| C | 5.29966100  | 4.44200800  | 1.75828300  |
| C | 4.08516000  | 2.50223500  | -1.20197400 |
| C | 3.65198800  | 4.81911700  | -0.48407800 |
| C | 4.71142200  | 5.71726700  | 1.51073200  |
| H | 5.90711200  | 4.29883200  | 2.64617500  |
| C | 3.23285400  | 2.69335300  | -2.31129900 |

|   |            |             |             |
|---|------------|-------------|-------------|
| C | 2.82604400 | 4.99821700  | -1.59268000 |
| C | 3.89791900 | 5.89001100  | 0.43278300  |
| H | 4.89464500 | 6.53621200  | 2.19832400  |
| C | 2.97358100 | 1.67269500  | -3.28454300 |
| C | 2.59146300 | 3.96555300  | -2.49831900 |
| H | 2.34995300 | 5.96326200  | -1.75121600 |
| H | 3.41760600 | 6.84588300  | 0.24434700  |
| C | 2.09623900 | 1.87597400  | -4.30924900 |
| H | 3.48155700 | 0.71934100  | -3.20040300 |
| C | 1.69943700 | 4.14851000  | -3.60312800 |
| C | 1.43987300 | 3.13206600  | -4.47115100 |
| H | 1.90175900 | 1.07613900  | -5.01691600 |
| H | 1.21961100 | 5.11649600  | -3.71788000 |
| H | 0.74837300 | 3.27462400  | -5.29507200 |
| H | 5.49767000 | 2.42013200  | 1.14111500  |
| O | 2.99454200 | -0.20695100 | -1.01233600 |
| O | 2.90177900 | -1.81260100 | 0.95854600  |
| P | 2.20931000 | -0.47950800 | 0.37303800  |
| O | 0.75232800 | -0.58798500 | 0.12868700  |
| O | 2.68007100 | 0.61234100  | 1.38070100  |
| H | 7.82508200 | -2.57161300 | -1.60727300 |
| H | 8.04780900 | -2.24692900 | 0.10963600  |
| H | 4.37728800 | -2.36583000 | -3.23582600 |
| H | 6.03653200 | -2.95748600 | -3.04763300 |
| H | 5.22749400 | -5.21215700 | -2.49063300 |
| H | 3.99277700 | -4.71910000 | -3.64573000 |
| H | 6.32395900 | -4.26980100 | -0.66005700 |
| H | 1.89418400 | 0.96699400  | 1.93732500  |
